# Supplementary material for: Ubiquitin activation is essential for schizont maturation in Plasmodium falciparum blood-stage development
Source: PLoS Pathog. 2020 Jun 22;16(6):e1008640. doi: 10.1371/journal.ppat.1008640 (PMC7332102; doi:10.1371/journal.ppat.1008640)
Supplement: S1 Dataset — (XLSX) [file ppat.1008640.s009.xlsx]

## Sheet: P. falciparum peptides
Sample independent ubiquitinylated peptide properties												Leading peptide identification from peptide with highest localisation probablity											RING					TROPHOZOITE					SCHIZONT					MEROZOITE
All Proteins	Positions within all proteins	Position within leading protein	LEADING AcNR	LEADING PROTEIN NAME (PlasmoDB v.46)	Fasta headers	Number of GlyGly (K)	Amino acid	Sequence window	Position in peptide	ubiquitiny-lation motif (from Motif X)	motif name	Maximum Localization probability > 0.75	GlyGly (K) Probabilities	disclaimer for C terminal modified peptides	GlyGly (K) Score diffs	Charge	Mass error [ppm]	Score diff	PEP	Score	Delta score	Score for localization	Localization prob ring	Score diff ring	PEP ring	Score ring	Intensity ring	Localization prob trophozoite	Score diff trophozoite	PEP trophozoite	Score trophozoite	Intensity trophozoite	Localization prob schizont	Score diff schizont	PEP schizont	Score schizont	Intensity schizont	Localization prob merozoites	Score diff merozoites	PEP merozoites	Score merozoites	Intensity merozoites
PF3D7_0102200	259	259	PF3D7_0102200	ring-infected erythrocyte surface antigen	>PF3D7_0102200 organism=Plasmodium_falciparum_3D7 product=ring-infected erythrocyte surface antigen (RESA) location=Pf3D7_01_v3:98819-102282(+) length=1085 sequence_SO=chromosome SO=protein_coding	1	K	DQGGENLEERLNSQFKNWYRQKYLNLEEYRR	6			1	LNSQFK(1)NWYR	FALSE	LNSQFK(67.33)NWYR	2	-1.4404	67.3338	0.00147263	71.451	53.785	67.334	1	52.4897	0.00147263	71.451							1	67.3338	0.0108674	67.334
PF3D7_0102200	545	545	PF3D7_0102200	ring-infected erythrocyte surface antigen	>PF3D7_0102200 organism=Plasmodium_falciparum_3D7 product=ring-infected erythrocyte surface antigen (RESA) location=Pf3D7_01_v3:98819-102282(+) length=1085 sequence_SO=chromosome SO=protein_coding	1	K	VGVNADMNEITERYFKLAENYYPYQRSGSTV	3	......K.A....	motif1	1	YFK(1)LAENYYPYQR	FALSE	YFK(53.45)LAENYYPYQR	3	-0.80235	53.4477	3.02932e-05	107.97	96.324	53.448											1	53.4477	3.02932e-05	107.97	24789000
PF3D7_0102200	612	612	PF3D7_0102200	ring-infected erythrocyte surface antigen	>PF3D7_0102200 organism=Plasmodium_falciparum_3D7 product=ring-infected erythrocyte surface antigen (RESA) location=Pf3D7_01_v3:98819-102282(+) length=1085 sequence_SO=chromosome SO=protein_coding	1	K	MNPSIFYLLSSLEKFKDFTGTPQIVTLLRFF	2			1	FK(1)DFTGTPQIVTLLR	FALSE	FK(42.95)DFTGTPQIVTLLR	3	0.20968	42.9467	0.00082815	42.947	36.26	42.947																1	42.9467	0.00082815	42.947	4555600
PF3D7_0102200;PF3D7_1149200		215	PF3D7_0102200	ring-infected erythrocyte surface antigen	>PF3D7_0102200 organism=Plasmodium_falciparum_3D7 product=ring-infected erythrocyte surface antigen (RESA) location=Pf3D7_01_v3:98819-102282(+) length=1085 sequence_SO=chromosome SO=protein_coding;>PF3D7_1149200 organism=Plasmodium_falciparum_3D7 product=	1	K	DINKRKYDFLKTKLQKTYSQYKVQYDMPKEV;DINKRKYDSLKEKLQKTYSQYKVQYDMPKEA	3			1	LQK(1)TYSQYK	FALSE	LQK(72.14)TYSQYK(-72.14)	2	-0.27056	72.1378	0.0114563	92.838	24.941	92.838	0.999996	53.7941	0.0272322	71.614	4652800						1	72.1378	0.0114563	92.838	9015100
PF3D7_0102200;PF3D7_1149200		176	PF3D7_0102200	ring-infected erythrocyte surface antigen	>PF3D7_0102200 organism=Plasmodium_falciparum_3D7 product=ring-infected erythrocyte surface antigen (RESA) location=Pf3D7_01_v3:98819-102282(+) length=1085 sequence_SO=chromosome SO=protein_coding;>PF3D7_1149200 organism=Plasmodium_falciparum_3D7 product=	1	K	FNPLIVDKVLFDYNEKVDNLGRSGGDIIKKM	8			1	VLFDYNEK(1)VDNLGR	FALSE	VLFDYNEK(42.32)VDNLGR	3	0.37175	42.3169	0.000197355	66.004	57.439	42.317	1	66.0043	0.000197355	66.004	31769000						1	42.3169	0.000440867	57.434	15511000
PF3D7_0102200;PF3D7_1149200		189	PF3D7_0102200	ring-infected erythrocyte surface antigen	>PF3D7_0102200 organism=Plasmodium_falciparum_3D7 product=ring-infected erythrocyte surface antigen (RESA) location=Pf3D7_01_v3:98819-102282(+) length=1085 sequence_SO=chromosome SO=protein_coding;>PF3D7_1149200 organism=Plasmodium_falciparum_3D7 product=	1	K	NEKVDNLGRSGGDIIKKMQTLWDEIMDINKR	7			0.883094	SGGDIIK(0.883)K(0.117)	FALSE	SGGDIIK(8.78)K(-8.78)	2	-0.17388	8.7817	0.0236138	76.679	21.148	76.679	0.868682	8.20538	0.0240697	76.221	77275000						0.883094	8.7817	0.0236138	76.679	200020000
PF3D7_0102200;PF3D7_1149200		221	PF3D7_0102200	ring-infected erythrocyte surface antigen	>PF3D7_0102200 organism=Plasmodium_falciparum_3D7 product=ring-infected erythrocyte surface antigen (RESA) location=Pf3D7_01_v3:98819-102282(+) length=1085 sequence_SO=chromosome SO=protein_coding;>PF3D7_1149200 organism=Plasmodium_falciparum_3D7 product=	1	K	YDFLKTKLQKTYSQYKVQYDMPKEVYESKWG;YDSLKEKLQKTYSQYKVQYDMPKEAYESKWT	6	......K.Q....	motif7	0.999988	TYSQYK(1)VQYDMPK	FALSE	TYSQYK(49.32)VQYDMPK(-49.32)	3	-0.56996	49.323	0.000105724	59.227	48.874	57.106											0.999988	49.323	0.000105724	59.227	26692000
PF3D7_0103200	401	401	PF3D7_0103200	nucleoside transporter 4	>PF3D7_0103200 organism=Plasmodium_falciparum_3D7 product=nucleoside transporter 4 (NT4) location=Pf3D7_01_v3:140662-142219(-) length=434 sequence_SO=chromosome SO=protein_coding	1	K	NISYARISDCFEESNKKTKQIAVASSFCALC	10	......K.....A	motif2	0.874689	ISDCFEESNK(0.875)K(0.125)	FALSE	ISDCFEESNK(8.44)K(-8.44)	2	-0.50731	8.43865	0.00105365	99.752	76.284	99.752																0.874689	8.43865	0.00105365	99.752	8374500
PF3D7_0103200	230	230	PF3D7_0103200	nucleoside transporter 4	>PF3D7_0103200 organism=Plasmodium_falciparum_3D7 product=nucleoside transporter 4 (NT4) location=Pf3D7_01_v3:140662-142219(-) length=434 sequence_SO=chromosome SO=protein_coding	1	K	YNGSNDLCEVEKGKNKSSENIQSNNVSMISK	2			1	NK(1)SSENIQSNNVSMISK	FALSE	NK(76.28)SSENIQSNNVSMISK(-76.28)	3	0.42218	76.281	7.02198e-08	93.226	60.524	78.078											1	76.281	7.02198e-08	93.226	14562000
PF3D7_0103200	203	203	PF3D7_0103200	nucleoside transporter 4	>PF3D7_0103200 organism=Plasmodium_falciparum_3D7 product=nucleoside transporter 4 (NT4) location=Pf3D7_01_v3:140662-142219(-) length=434 sequence_SO=chromosome SO=protein_coding	1	K	IFIQYNSPYFKEQKEKIESAQNKKCIEYNGS	2			1	EK(1)IESAQNKK	FALSE	EK(75.03)IESAQNK(-75.03)K(-80.88)	3	0.093233	75.0335	0.000931547	94.692	9.0164	94.692																1	75.0335	0.000931547	94.692	19172000
PF3D7_0103200	210	210	PF3D7_0103200	nucleoside transporter 4	>PF3D7_0103200 organism=Plasmodium_falciparum_3D7 product=nucleoside transporter 4 (NT4) location=Pf3D7_01_v3:140662-142219(-) length=434 sequence_SO=chromosome SO=protein_coding	1	K	PYFKEQKEKIESAQNKKCIEYNGSNDLCEVE	9			0.983137	EKIESAQNK(0.983)K(0.017)	FALSE	EK(-51.26)IESAQNK(17.66)K(-17.66)	3	0.087286	17.6587	0.00177931	132.25	32.562	86.014											0.978953	16.6758	0.00310111	132.25	3018700	0.983137	17.6587	0.00177931	107.06	7016800
PF3D7_0104200	465	465	PF3D7_0104200	StAR-related lipid transfer protein	>PF3D7_0104200 organism=Plasmodium_falciparum_3D7 product=StAR-related lipid transfer protein location=Pf3D7_01_v3:182822-184222(-) length=466 sequence_SO=chromosome SO=protein_coding	1	K	INVNFFKKIFGIFFNKD______________	8			1	IFGIFFNK(1)	TRUE	IFGIFFNK(79.47)	2	0.65731	79.4686	0.00279691	89.55	16.622	79.469						1	79.4686	0.0328314	89.55	10229000						1	89.5498	0.00279691	89.55
PF3D7_0104800	251	251	PF3D7_0104800	novel putative transporter 1, putative	>PF3D7_0104800 organism=Plasmodium_falciparum_3D7 product=novel putative transporter 1 (NPT1) location=Pf3D7_01_v3:215776-217509(+) length=577 sequence_SO=chromosome SO=protein_coding	1	K	FKALDYYLEKNNETTKHTNAEGRSRSSNNIY	6			1	NNETTK(1)HTNAEGR	FALSE	NNETTK(61.41)HTNAEGR	3	-0.21545	61.4093	0.000477416	61.409	31.204	61.409																1	61.4093	0.000477416	61.409	16177000
PF3D7_0106300	578	578	PF3D7_0106300	calcium-transporting ATPase	>PF3D7_0106300 organism=Plasmodium_falciparum_3D7 product=calcium-transporting ATPase (ATP6) location=Pf3D7_01_v3:265208-269173(-) length=1228 sequence_SO=chromosome SO=protein_coding	1	K	PAEYEKNTTPVQSSNKKDKSPRGINKFFSSK	10			0.959068	NTTPVQSSNK(0.959)K(0.041)	FALSE	NTTPVQSSNK(13.7)K(-13.7)	2	0.1687	13.6979	0.000942226	101.39	64.24	74.237																0.959068	13.6979	0.0010979	101.39	17330000
PF3D7_0106300	874	874	PF3D7_0106300	calcium-transporting ATPase	>PF3D7_0106300 organism=Plasmodium_falciparum_3D7 product=calcium-transporting ATPase (ATP6) location=Pf3D7_01_v3:265208-269173(-) length=1228 sequence_SO=chromosome SO=protein_coding	1	K	ICCYNGREFEDFSLEKQKHILKNTPRIVFCR	9			0.968618	EFEDFSLEK(0.969)QK(0.031)	FALSE	EFEDFSLEK(14.89)QK(-14.89)	2	0.34906	14.8947	0.00820275	80.834	53.406	68.132																0.968618	14.8947	0.00820275	68.132	15724000
PF3D7_0106300	960	960	PF3D7_0106300	calcium-transporting ATPase	>PF3D7_0106300 organism=Plasmodium_falciparum_3D7 product=calcium-transporting ATPase (ATP6) location=Pf3D7_01_v3:265208-269173(-) length=1228 sequence_SO=chromosome SO=protein_coding	1	K	IVLADDNFNTIVEAIKEGRCIYNNMKAFIRY	20	....A.K......	motif10	1	EASDIVLADDNFNTIVEAIK(1)EGR	FALSE	EASDIVLADDNFNTIVEAIK(89.66)EGR	3	-0.15722	89.6627	3.2274e-16	89.663	83.356	89.663																1	89.6627	3.2274e-16	89.663	12519000
PF3D7_0106300	453	453	PF3D7_0106300	calcium-transporting ATPase	>PF3D7_0106300 organism=Plasmodium_falciparum_3D7 product=calcium-transporting ATPase (ATP6) location=Pf3D7_01_v3:265208-269173(-) length=1228 sequence_SO=chromosome SO=protein_coding	1	K	ADPYSDYFSSDSKKMKNDLNNNNNNNNNSSR	2			1	MK(1)NDLNNNNNNNNNSSR	FALSE	MK(51.5)NDLNNNNNNNNNSSR	3	-1.0461	51.4954	0.000136561	51.495	45.532	51.495																1	51.4954	0.000136561	51.495	6589900
PF3D7_0107000;sp|Q12798|CETN1_HUMAN		104	PF3D7_0107000	centrin-1	>PF3D7_0107000 organism=Plasmodium_falciparum_3D7 product=centrin-1 (CEN1) location=Pf3D7_01_v3:293642-294968(+) length=168 sequence_SO=chromosome SO=protein_coding;>sp|Q12798|CETN1_HUMAN Centrin-1 OS=Homo sapiens GN=CETN1 PE=1 SV=1	1	K	MTIKMSERDPKEEILKAFRLFDDDETGKISF	5	......KA.....	motif3	1	EEILK(1)AFR	FALSE	EEILK(84.57)AFR	2	-0.36953	84.5678	0.0296509	87.323	66.802	84.568																1	84.5678	0.0296509	87.323	20896000
PF3D7_0108500	13	13	PF3D7_0108500	conserved Plasmodium protein, unknown function	>PF3D7_0108500 organism=Plasmodium_falciparum_3D7 product=conserved Plasmodium protein, unknown function location=Pf3D7_01_v3:349170-349709(+) length=179 sequence_SO=chromosome SO=protein_coding	1	K	___MAKRKYMSKVDGKINVGEKHQAKIPDLV	4	.....GK......	motif4	0.999935	VDGK(1)INVGEK	FALSE	VDGK(41.88)INVGEK(-41.88)	2	-0.93695	41.8803	0.00362274	95.477	42.995	95.477																0.999935	41.8803	0.00362274	95.477	10296000
PF3D7_0108500	19	19	PF3D7_0108500	conserved Plasmodium protein, unknown function	>PF3D7_0108500 organism=Plasmodium_falciparum_3D7 product=conserved Plasmodium protein, unknown function location=Pf3D7_01_v3:349170-349709(+) length=179 sequence_SO=chromosome SO=protein_coding	1	K	RKYMSKVDGKINVGEKHQAKIPDLVTDENEK	6	......K..A...	motif6	0.996362	INVGEK(0.996)HQAK(0.004)	FALSE	INVGEK(24.38)HQAK(-24.38)	3	0.62017	24.375	0.00290188	59.067	30.859	59.067																0.996362	24.375	0.00290188	59.067	7428700
PF3D7_0109000	208	208	PF3D7_0109000	photosensitized INA-labeled protein PHIL1	>PF3D7_0109000 organism=Plasmodium_falciparum_3D7 product=photosensitized INA-labeled protein PHIL1, putative (PHIL1) location=Pf3D7_01_v3:363318-363992(+) length=224 sequence_SO=chromosome SO=protein_coding	1	K	EEFKPYEVTKYYDEGKVKTVFNFDQENYNQD	6	.....GK......	motif4	0.998665	YYDEGK(0.999)VK(0.001)	FALSE	YYDEGK(28.74)VK(-28.74)	2	0.32623	28.7399	0.00592258	133.12	32.928	95.909																0.998665	28.7399	0.0239067	95.909	247000000
PF3D7_0109000	168	168	PF3D7_0109000	photosensitized INA-labeled protein PHIL1	>PF3D7_0109000 organism=Plasmodium_falciparum_3D7 product=photosensitized INA-labeled protein PHIL1, putative (PHIL1) location=Pf3D7_01_v3:363318-363992(+) length=224 sequence_SO=chromosome SO=protein_coding	1	K	SIPIKSSPNVFKRRSKGEANSEWSNAFVTRV	2	......K..A...	motif6	1	SK(1)GEANSEWSNAFVTR	FALSE	SK(78.23)GEANSEWSNAFVTR	3	-0.21084	78.228	1.10797e-06	82.349	71.568	78.228																1	78.228	1.10797e-06	82.349	41327000
PF3D7_0109000	210	210	PF3D7_0109000	photosensitized INA-labeled protein PHIL1	>PF3D7_0109000 organism=Plasmodium_falciparum_3D7 product=photosensitized INA-labeled protein PHIL1, putative (PHIL1) location=Pf3D7_01_v3:363318-363992(+) length=224 sequence_SO=chromosome SO=protein_coding	1	K	FKPYEVTKYYDEGKVKTVFNFDQENYNQDM_	2			1	VK(1)TVFNFDQENYNQDM	FALSE	VK(55.75)TVFNFDQENYNQDM	2	-0.76847	55.7548	0.000805536	55.755	49.273	55.755																1	55.7548	0.000805536	55.755	7609600
PF3D7_0110900	54	54	PF3D7_0110900	adenylate kinase-like protein 1	>PF3D7_0110900 organism=Plasmodium_falciparum_3D7 product=adenylate kinase-like protein 1 (AKLP1) location=Pf3D7_01_v3:420293-420853(-) length=186 sequence_SO=chromosome SO=protein_coding	1	K	MEGFEMTHLNLSNIIKDERLYKEFDDELDAS	19			1	RNDMEGFEMTHLNLSNIIK(1)DER	FALSE	RNDMEGFEMTHLNLSNIIK(72.99)DER	4	-0.35038	72.9898	7.34228e-11	72.99	68.789	72.99																1	72.9898	7.34228e-11	72.99	13823000
PF3D7_0113200	160	160	PF3D7_0113200	Plasmodium exported protein, unknown function	>PF3D7_0113200 organism=Plasmodium_falciparum_3D7 product=Plasmodium exported protein, unknown function location=Pf3D7_01_v3:500959-502868(-) length=592 sequence_SO=chromosome SO=protein_coding	1	K	QTNESNNKREISLTVKNQKNQTNKSKNNKKD	7	......K.Q....	motif7	0.807575	EISLTVK(0.808)NQK(0.192)	FALSE	EISLTVK(6.23)NQK(-6.23)	2	3.0389	6.22921	0.00392238	93.667	54.953	83.278											0.807575	6.22921	0.00392238	93.667	15810000
PF3D7_0113200	275	275	PF3D7_0113200	Plasmodium exported protein, unknown function	>PF3D7_0113200 organism=Plasmodium_falciparum_3D7 product=Plasmodium exported protein, unknown function location=Pf3D7_01_v3:500959-502868(-) length=592 sequence_SO=chromosome SO=protein_coding	1	K	YTHTNLPNNNNNNKVKGQQYNHQTENKNKNK	2	......K.Q....	motif7	1	VK(1)GQQYNHQTENK	FALSE	VK(77.22)GQQYNHQTENK(-77.22)	3	-0.25835	77.217	3.1391e-05	107.39	79.956	81.918											1	77.217	3.1391e-05	107.39	36336000
PF3D7_0113200	152	152	PF3D7_0113200	Plasmodium exported protein, unknown function	>PF3D7_0113200 organism=Plasmodium_falciparum_3D7 product=Plasmodium exported protein, unknown function location=Pf3D7_01_v3:500959-502868(-) length=592 sequence_SO=chromosome SO=protein_coding	1	K	FSSEINKTQTNESNNKREISLTVKNQKNQTN	9			1	TQTNESNNK(1)R	FALSE	TQTNESNNK(67.33)R	3	-1.6018	67.3338	0.000411435	93.556	49.238	67.334											1	67.3338	0.000411435	93.556	176680000
PF3D7_0113200	290	290	PF3D7_0113200	Plasmodium exported protein, unknown function	>PF3D7_0113200 organism=Plasmodium_falciparum_3D7 product=Plasmodium exported protein, unknown function location=Pf3D7_01_v3:500959-502868(-) length=592 sequence_SO=chromosome SO=protein_coding	1	K	KGQQYNHQTENKNKNKIINYPRQDSQTNHYG	2			1	NK(1)IINYPR	FALSE	NK(84.57)IINYPR	2	-0.77867	84.5678	0.0299667	86.794	42.445	84.568						1	84.5678	0.0299667	86.794	14131000
PF3D7_0113900	234	234	PF3D7_0113900	CX3CL1-binding protein 1	>PF3D7_0113900 organism=Plasmodium_falciparum_3D7 product=Plasmodium exported protein (hyp8), unknown function (GEXP10) location=Pf3D7_01_v3:537109-538025(-) length=243 sequence_SO=chromosome SO=protein_coding	1	K	SSLEKGYRIADLYSEKILRQILHFQ______	8	A.....K......	motif8	1	IADLYSEK(1)ILR	FALSE	IADLYSEK(74.61)ILR	2	-0.17383	74.6109	0.00579584	74.611	51.493	74.611											1	74.6109	0.00579584	74.611	4690700
PF3D7_0113900	111	111	PF3D7_0113900	CX3CL1-binding protein 1	>PF3D7_0113900 organism=Plasmodium_falciparum_3D7 product=Plasmodium exported protein (hyp8), unknown function (GEXP10) location=Pf3D7_01_v3:537109-538025(-) length=243 sequence_SO=chromosome SO=protein_coding	1	K	KMLIKLYIDSSHDSAKEEKLFQQVKKYFKNN	11	.....AK......	motif5	0.98424	LYIDSSHDSAK(0.984)EEK(0.016)	FALSE	LYIDSSHDSAK(17.96)EEK(-17.96)	3	-1.2554	17.9556	6.44984e-05	78.505	51.407	78.505											0.98424	17.9556	6.44984e-05	78.505	29735000
PF3D7_0113900	88	88	PF3D7_0113900	CX3CL1-binding protein 1	>PF3D7_0113900 organism=Plasmodium_falciparum_3D7 product=Plasmodium exported protein (hyp8), unknown function (GEXP10) location=Pf3D7_01_v3:537109-538025(-) length=243 sequence_SO=chromosome SO=protein_coding	1	K	NDNNYDSNLLKSEEQKQEISEHMKMLIKLYI	5			1	SEEQK(1)QEISEHMK	FALSE	SEEQK(70.78)QEISEHMK(-70.78)	3	-0.17236	70.7834	5.89089e-05	83.204	76.726	83.204											1	70.7834	5.89089e-05	83.204	28626000
PF3D7_0114000	109	109	PF3D7_0114000	exported protein family 1	>PF3D7_0114000 organism=Plasmodium_falciparum_3D7 product=exported protein family 1 (EPF1) location=Pf3D7_01_v3:542480-546983(+) length=1463 sequence_SO=chromosome SO=protein_coding	1	K	REQIRTQREPQKSNYKASMKNYLKCVKSAPY	4	......KA.....	motif3	0.999991	SNYK(1)ASMK	FALSE	SNYK(50.31)ASMK(-50.31)	2	-0.3253	50.3088	0.0306405	85.666	17.041	85.666											0.999991	50.3088	0.0306405	85.666	8410900
PF3D7_0114000	105	105	PF3D7_0114000	exported protein family 1	>PF3D7_0114000 organism=Plasmodium_falciparum_3D7 product=exported protein family 1 (EPF1) location=Pf3D7_01_v3:542480-546983(+) length=1463 sequence_SO=chromosome SO=protein_coding	1	K	KVNRREQIRTQREPQKSNYKASMKNYLKCVK	7			0.998194	TQREPQK(0.998)SNYK(0.002)	FALSE	TQREPQK(27.43)SNYK(-27.43)	3	-0.17065	27.4251	0.00164296	72.705	54.128	72.705											0.998194	27.4251	0.00164296	72.705	20673000
PF3D7_0201900	422	422	PF3D7_0201900	erythrocyte membrane protein 3	>PF3D7_0201900 organism=Plasmodium_falciparum_3D7 product=erythrocyte membrane protein 3 (EMP3) location=Pf3D7_02_v3:91318-98838(-) length=2441 sequence_SO=chromosome SO=protein_coding	1	K	LIAAEEPDDEKKIKLKDSDDKVVVPVNKNKS	2			0.901751	LK(0.902)DSDDK(0.098)VVVPVNK	FALSE	LK(9.63)DSDDK(-9.63)VVVPVNK(-44.38)	3	-0.90517	9.62906	0.00382228	47.242	29.147	47.242											0.901751	9.62906	0.00382228	47.242
PF3D7_0201900	86	86	PF3D7_0201900	erythrocyte membrane protein 3	>PF3D7_0201900 organism=Plasmodium_falciparum_3D7 product=erythrocyte membrane protein 3 (EMP3) location=Pf3D7_02_v3:91318-98838(-) length=2441 sequence_SO=chromosome SO=protein_coding	1	K	LSSRGVRDPRTKEALKEKQFRDHKRKEALKQ	6	....A.K......	motif10	0.999924	TKEALK(1)EK	FALSE	TK(-81.02)EALK(41.17)EK(-41.17)	2	-0.19375	41.1679	0.0146954	142	74.581	114.4						0.999924	41.1679	0.0428801	114.4	16451000	0.999464	32.7049	0.0146954	142	335480000
PF3D7_0202000	551	551	PF3D7_0202000	knob-associated histidine-rich protein	>PF3D7_0202000 organism=Plasmodium_falciparum_3D7 product=knob-associated histidine-rich protein (KAHRP) location=Pf3D7_02_v3:103385-105796(-) length=654 sequence_SO=chromosome SO=protein_coding	1	K	AEGATKGATKEASTSKEATKEASTSKEATKE	6	......K.A....	motif1	0.999852	EASTSK(1)EATK	FALSE	EASTSK(38.3)EATK(-38.3)	2	0.75063	38.2989	0.00319853	98.04	71.995	81.017						0.999852	38.2989	0.00947606	81.017	3011700	0.999828	37.6424	0.00319853	98.04	29542000	0.9894	19.7005	0.0383443	55.353	1777800
PF3D7_0202000	510	510	PF3D7_0202000	knob-associated histidine-rich protein	>PF3D7_0202000 organism=Plasmodium_falciparum_3D7 product=knob-associated histidine-rich protein (KAHRP) location=Pf3D7_02_v3:103385-105796(-) length=654 sequence_SO=chromosome SO=protein_coding	1	K	TSADNKSTNAATPGAKDKTQGGKTDKTGAST	10	.....AK......	motif5	0.826763	STNAATPGAK(0.827)DK(0.173)	FALSE	STNAATPGAK(6.79)DK(-6.79)	2	0.076285	6.78741	0.000469372	121.66	76.32	121.66											0.826763	6.78741	0.000469372	121.66	37060000
PF3D7_0202000	517	517	PF3D7_0202000	knob-associated histidine-rich protein	>PF3D7_0202000 organism=Plasmodium_falciparum_3D7 product=knob-associated histidine-rich protein (KAHRP) location=Pf3D7_02_v3:103385-105796(-) length=654 sequence_SO=chromosome SO=protein_coding	1	K	TNAATPGAKDKTQGGKTDKTGASTNAATNKG	7	......K.....A	motif2	0.999516	DKTQGGK(1)TDK	FALSE	DK(-49.71)TQGGK(33.24)TDK(-33.24)	2	-0.342	33.2435	0.00635001	110.31	40.249	110.31											0.999516	33.2435	0.00635001	110.31	11624000
PF3D7_0202000	468	468	PF3D7_0202000	knob-associated histidine-rich protein	>PF3D7_0202000 organism=Plasmodium_falciparum_3D7 product=knob-associated histidine-rich protein (KAHRP) location=Pf3D7_02_v3:103385-105796(-) length=654 sequence_SO=chromosome SO=protein_coding	1	K	KTNEENKNKEKTNNSKSDGSKAHEKKENETK	5	......K.....A	motif2	0.999931	TNNSK(1)SDGSK	FALSE	TNNSK(41.59)SDGSK(-41.59)	2	0.52893	41.5892	0.00373626	94.791	54.44	86.014											0.999931	41.5892	0.00373626	94.791	13088000
PF3D7_0202000	581	581	PF3D7_0202000	knob-associated histidine-rich protein	>PF3D7_0202000 organism=Plasmodium_falciparum_3D7 product=knob-associated histidine-rich protein (KAHRP) location=Pf3D7_02_v3:103385-105796(-) length=654 sequence_SO=chromosome SO=protein_coding	1	K	EASTSKEATKEASTSKGATKEASTTEGATKG	6	......K.A....	motif1	0.999628	EASTSK(1)GATK	FALSE	EASTSK(34.29)GATK(-34.29)	2	0.3377	34.2891	0.0179158	69.721	35.334	62.466											0.999628	34.2891	0.0179158	69.721	15678000
PF3D7_0202000	365	365	PF3D7_0202000	knob-associated histidine-rich protein	>PF3D7_0202000 organism=Plasmodium_falciparum_3D7 product=knob-associated histidine-rich protein (KAHRP) location=Pf3D7_02_v3:103385-105796(-) length=654 sequence_SO=chromosome SO=protein_coding	1	K	NKYGKHGDEKHHSSKKHEGNDGEGEKKKKSK	1	......K..G...	motif9	1	K(1)HEGNDGEGEK	FALSE	K(136.1)HEGNDGEGEK(-136.1)	2	-0.31606	136.104	0.000351807	149.69	83.394	149.69											1	136.104	0.000351807	149.69	23418000
PF3D7_0202000	520	520	PF3D7_0202000	knob-associated histidine-rich protein	>PF3D7_0202000 organism=Plasmodium_falciparum_3D7 product=knob-associated histidine-rich protein (KAHRP) location=Pf3D7_02_v3:103385-105796(-) length=654 sequence_SO=chromosome SO=protein_coding	1	K	ATPGAKDKTQGGKTDKTGASTNAATNKGQCA	3	......K..A...	motif6	1	TDK(1)TGASTNAATNK	FALSE	TDK(93.69)TGASTNAATNK(-93.69)	2	-0.40053	93.6944	2.83851e-06	123.8	94.844	123.8											1	93.6944	2.83851e-06	123.8	36848000
PF3D7_0202000	152	152	PF3D7_0202000	knob-associated histidine-rich protein	>PF3D7_0202000 organism=Plasmodium_falciparum_3D7 product=knob-associated histidine-rich protein (KAHRP) location=Pf3D7_02_v3:103385-105796(-) length=654 sequence_SO=chromosome SO=protein_coding	1	K	VKTQVFREARPGGGFKAYEEKYESKHYKLKE	9	......KA.....	motif3	0.999941	EARPGGGFK(1)AYEEK	FALSE	EARPGGGFK(42.3)AYEEK(-42.3)	3	-0.78421	42.2981	0.000445607	57.267	27.964	57.267											0.999941	42.2981	0.000445607	57.267	7040900
PF3D7_0202000	473	473	PF3D7_0202000	knob-associated histidine-rich protein	>PF3D7_0202000 organism=Plasmodium_falciparum_3D7 product=knob-associated histidine-rich protein (KAHRP) location=Pf3D7_02_v3:103385-105796(-) length=654 sequence_SO=chromosome SO=protein_coding	1	K	NKNKEKTNNSKSDGSKAHEKKENETKNTAGE	5	......KA.....	motif3	0.99977	SDGSK(1)AHEK	FALSE	SDGSK(36.39)AHEK(-36.39)	2	0.043395	36.3892	0.0151103	85.807	43.52	85.807											0.99977	36.3892	0.0151103	85.807	35466000
PF3D7_0202000	491	491	PF3D7_0202000	knob-associated histidine-rich protein	>PF3D7_0202000 organism=Plasmodium_falciparum_3D7 product=knob-associated histidine-rich protein (KAHRP) location=Pf3D7_02_v3:103385-105796(-) length=654 sequence_SO=chromosome SO=protein_coding	1	K	EKKENETKNTAGENKKVDSTSADNKSTNAAT	1	......K.....A	motif2	1	K(1)VDSTSADNK	FALSE	K(113.63)VDSTSADNK(-113.63)	2	0.72139	113.633	0.000668593	127.87	84.56	127.87											1	113.633	0.000668593	127.87	33136000
PF3D7_0202000	555	555	PF3D7_0202000	knob-associated histidine-rich protein	>PF3D7_0202000 organism=Plasmodium_falciparum_3D7 product=knob-associated histidine-rich protein (KAHRP) location=Pf3D7_02_v3:103385-105796(-) length=654 sequence_SO=chromosome SO=protein_coding	1	K	TKGATKEASTSKEATKEASTSKEATKEASTS	4	......K.A....	motif1	0.998845	EATK(0.999)EASTSK(0.001)	FALSE	EATK(29.37)EASTSK(-29.37)	2	0.091528	29.3705	0.0361739	46.844	12.089	46.844											0.998845	29.3705	0.0361739	46.844
PF3D7_0202000	585	585	PF3D7_0202000	knob-associated histidine-rich protein	>PF3D7_0202000 organism=Plasmodium_falciparum_3D7 product=knob-associated histidine-rich protein (KAHRP) location=Pf3D7_02_v3:103385-105796(-) length=654 sequence_SO=chromosome SO=protein_coding	1	K	SKEATKEASTSKGATKEASTTEGATKGASTT	4	......K.A....	motif1	1	GATK(1)EASTTEGATK	FALSE	GATK(75.95)EASTTEGATK(-75.95)	2	-0.92263	75.9521	1.99777e-05	116.58	79.99	98.943											1	75.9521	1.99777e-05	116.58	46225000
PF3D7_0202000	166	166	PF3D7_0202000	knob-associated histidine-rich protein	>PF3D7_0202000 organism=Plasmodium_falciparum_3D7 product=knob-associated histidine-rich protein (KAHRP) location=Pf3D7_02_v3:103385-105796(-) length=654 sequence_SO=chromosome SO=protein_coding	1	K	FKAYEEKYESKHYKLKENVVDGKKDCDEKYE	2			1	LK(1)ENVVDGK	FALSE	LK(76.53)ENVVDGK(-76.53)	2	1.2348	76.5265	0.0150026	86.014	33.525	86.014											1	76.5265	0.0150026	86.014	13624000
PF3D7_0202000	359	359	PF3D7_0202000	knob-associated histidine-rich protein	>PF3D7_0202000 organism=Plasmodium_falciparum_3D7 product=knob-associated histidine-rich protein (KAHRP) location=Pf3D7_02_v3:103385-105796(-) length=654 sequence_SO=chromosome SO=protein_coding	1	K	SSFSSVNKYGKHGDEKHHSSKKHEGNDGEGE	5			1	HGDEK(1)HHSSK	FALSE	HGDEK(92.01)HHSSK(-92.01)	3	-0.21815	92.0145	0.000182173	107.03	64.836	107.03											1	92.0145	0.000182173	107.03	54368000
PF3D7_0202000	500	500	PF3D7_0202000	knob-associated histidine-rich protein	>PF3D7_0202000 organism=Plasmodium_falciparum_3D7 product=knob-associated histidine-rich protein (KAHRP) location=Pf3D7_02_v3:103385-105796(-) length=654 sequence_SO=chromosome SO=protein_coding	1	K	TAGENKKVDSTSADNKSTNAATPGAKDKTQG	9			0.999999	VDSTSADNK(1)STNAATPGAK	FALSE	VDSTSADNK(62.82)STNAATPGAK(-62.82)	3	-0.026332	62.8189	6.11582e-11	97.081	80.718	97.081											0.999999	62.8189	6.11582e-11	97.081	72219000
PF3D7_0202000	416	416	PF3D7_0202000	knob-associated histidine-rich protein	>PF3D7_0202000 organism=Plasmodium_falciparum_3D7 product=knob-associated histidine-rich protein (KAHRP) location=Pf3D7_02_v3:103385-105796(-) length=654 sequence_SO=chromosome SO=protein_coding	1	K	AESVKSKKHKSHDCEKKKSKKHKDNEDAESV	6			0.999612	SHDCEK(1)K	FALSE	SHDCEK(34.11)K(-34.11)	2	-0.082716	34.1081	0.00365439	146.79	85.813	143.12											0.999612	34.1081	0.00365439	146.79	11227000
PF3D7_0202000	375	375	PF3D7_0202000	knob-associated histidine-rich protein	>PF3D7_0202000 organism=Plasmodium_falciparum_3D7 product=knob-associated histidine-rich protein (KAHRP) location=Pf3D7_02_v3:103385-105796(-) length=654 sequence_SO=chromosome SO=protein_coding	1	K	HHSSKKHEGNDGEGEKKKKSKKHKDHDGEKK	11			0.998813	KHEGNDGEGEK(0.999)K(0.001)	FALSE	K(-98.82)HEGNDGEGEK(29.25)K(-29.25)	2	-0.36142	29.2516	0.000148432	120.87	84.193	120.87											0.998813	29.2516	0.000148432	120.87	101240000
PF3D7_0202000	459	459	PF3D7_0202000	knob-associated histidine-rich protein	>PF3D7_0202000 organism=Plasmodium_falciparum_3D7 product=knob-associated histidine-rich protein (KAHRP) location=Pf3D7_02_v3:103385-105796(-) length=654 sequence_SO=chromosome SO=protein_coding	1	K	HNGKKPCSKKTNEENKNKEKTNNSKSDGSKA	7			0.996287	KTNEENK(0.996)NK(0.003)	FALSE	K(-34.04)TNEENK(24.77)NK(-24.77)	2	-0.37651	24.7727	0.0113274	90.05	8.0999	90.05											0.996287	24.7727	0.0113274	90.05	6098400
PF3D7_0202000	394	394	PF3D7_0202000	knob-associated histidine-rich protein	>PF3D7_0202000 organism=Plasmodium_falciparum_3D7 product=knob-associated histidine-rich protein (KAHRP) location=Pf3D7_02_v3:103385-105796(-) length=654 sequence_SO=chromosome SO=protein_coding	1	K	SKKHKDHDGEKKKSKKHKDNEDAESVKSKKH	1			0.94248	K(0.942)HK(0.058)DNEDAESVK	FALSE	K(12.15)HK(-12.15)DNEDAESVK(-50.54)	3	0.26449	12.1452	0.00348674	54.276	24.471	51.726											0.94248	12.1452	0.00348674	54.276	34758000
PF3D7_0202000	477	477	PF3D7_0202000	knob-associated histidine-rich protein	>PF3D7_0202000 organism=Plasmodium_falciparum_3D7 product=knob-associated histidine-rich protein (KAHRP) location=Pf3D7_02_v3:103385-105796(-) length=654 sequence_SO=chromosome SO=protein_coding	1	K	EKTNNSKSDGSKAHEKKENETKNTAGENKKV	4			0.811044	AHEK(0.811)K(0.189)ENETK	FALSE	AHEK(6.33)K(-6.33)ENETK(-44.23)	3	0.099503	6.32754	0.000818169	97.452	73.776	89.827											0.811044	6.32754	0.000818169	97.452	43538000
PF3D7_0202000	545	545	PF3D7_0202000	knob-associated histidine-rich protein	>PF3D7_0202000 organism=Plasmodium_falciparum_3D7 product=knob-associated histidine-rich protein (KAHRP) location=Pf3D7_02_v3:103385-105796(-) length=654 sequence_SO=chromosome SO=protein_coding	1	K	NKGQCAAEGATKGATKEASTSKEATKEASTS	4	......K.A....	motif1	0.99985	GATK(1)EASTSK	FALSE	GATK(38.24)EASTSK(-38.24)	2	0.024492	38.2354	0.000699812	78.814	61.697	63.073						0.579538	1.39356	0.000699812	78.814		0.99985	38.2354	0.0135646	63.073
PF3D7_0202000	354	354	PF3D7_0202000	knob-associated histidine-rich protein	>PF3D7_0202000 organism=Plasmodium_falciparum_3D7 product=knob-associated histidine-rich protein (KAHRP) location=Pf3D7_02_v3:103385-105796(-) length=654 sequence_SO=chromosome SO=protein_coding	1	K	HGSRYSSFSSVNKYGKHGDEKHHSSKKHEGN	3	.....GK......	motif4	1	YGK(1)HGDEK	FALSE	YGK(93.19)HGDEK(-93.19)	2	-0.52247	93.1857	0.0100071	123.5	43.694	100.25						1	93.1857	0.0204883	100.25	6805800	1	86.9415	0.0100071	123.5	76955000
PF3D7_0202000	351	351	PF3D7_0202000	knob-associated histidine-rich protein	>PF3D7_0202000 organism=Plasmodium_falciparum_3D7 product=knob-associated histidine-rich protein (KAHRP) location=Pf3D7_02_v3:103385-105796(-) length=654 sequence_SO=chromosome SO=protein_coding	1	K	GAAHGSRYSSFSSVNKYGKHGDEKHHSSKKH	9			0.998465	YSSFSSVNK(0.998)YGK(0.002)	FALSE	YSSFSSVNK(28.13)YGK(-28.13)	2	0.44321	28.1315	0.000597214	98.156	78.402	69.815						0.998465	28.1315	0.000718609	88.338	8023300	0.996484	24.5246	0.000597214	98.156	19357000
PF3D7_0202000	157	157	PF3D7_0202000	knob-associated histidine-rich protein	>PF3D7_0202000 organism=Plasmodium_falciparum_3D7 product=knob-associated histidine-rich protein (KAHRP) location=Pf3D7_02_v3:103385-105796(-) length=654 sequence_SO=chromosome SO=protein_coding	1	K	FREARPGGGFKAYEEKYESKHYKLKENVVDG	5	..A...K......	motif11	0.999996	AYEEK(1)YESK	FALSE	AYEEK(54.16)YESK(-54.16)	2	-0.30159	54.1572	0.00481434	113.62	87.238	104.2						0.999996	54.1572	0.0049793	111.61	26479000	0.999994	52.1749	0.00481434	113.62	34746000	0.999269	31.3571	0.0255002	73.233	4709400
PF3D7_0202000	645	645	PF3D7_0202000	knob-associated histidine-rich protein	>PF3D7_0202000 organism=Plasmodium_falciparum_3D7 product=knob-associated histidine-rich protein (KAHRP) location=Pf3D7_02_v3:103385-105796(-) length=654 sequence_SO=chromosome SO=protein_coding	1	K	EQVMSRGQAQLQEAGKKKKKRGCCG______	10	.....GK......	motif4	0.951532	GQAQLQEAGK(0.952)K(0.048)	FALSE	GQAQLQEAGK(12.93)K(-12.93)	3	-0.050104	12.9297	0.000734703	141.1	95.266	55.718						0.951532	12.9297	0.000734703	133.89	24255000	0.898928	9.49092	0.000781134	141.1		0.846227	7.40607	0.000766475	71.03	8778900
PF3D7_0202400	759	759	PF3D7_0202400	translation-enhancing factor	>PF3D7_0202400 organism=Plasmodium_falciparum_3D7 product=gamete antigen 27/25, putative location=Pf3D7_02_v3:120524-124102(+) length=1192 sequence_SO=chromosome SO=protein_coding	1	K	RIKKKMKDDDYDESLKTKNYYPHNMTFGQQQ	11			0.981692	MKDDDYDESLK(0.982)TK(0.018)	FALSE	MK(-36.51)DDDYDESLK(17.35)TK(-17.35)	3	-0.00061254	17.3458	0.0115984	41.227	33.183	41.227											0.981692	17.3458	0.0115984	41.227	6025500
PF3D7_0202500	93	93	PF3D7_0202500	early transcribed membrane protein 2	>PF3D7_0202500 organism=Plasmodium_falciparum_3D7 product=early transcribed membrane protein 2 (ETRAMP2) location=Pf3D7_02_v3:127994-128314(+) length=106 sequence_SO=chromosome SO=protein_coding	1	K	GDNKKGTPGAKKNDNKAVNPSISSTMYRA__	5	......KA.....	motif3	0.831385	K(0.169)NDNK(0.831)AVNPSISSTMYR	FALSE	K(-6.93)NDNK(6.93)AVNPSISSTMYR	3	-0.021104	6.92907	3.46024e-06	72.932	55.679	64.454																0.831385	6.92907	3.51531e-05	64.454	8817000
PF3D7_0202500	31	31	PF3D7_0202500	early transcribed membrane protein 2	>PF3D7_0202500 organism=Plasmodium_falciparum_3D7 product=early transcribed membrane protein 2 (ETRAMP2) location=Pf3D7_02_v3:127994-128314(+) length=106 sequence_SO=chromosome SO=protein_coding	1	K	LNFIAPRDYNSMVEAKPAKKLTPAERKKRNQ	9	......K.A....	motif1	0.797231	DYNSMVEAK(0.797)PAK(0.178)K(0.025)	FALSE	DYNSMVEAK(6.51)PAK(-6.51)K(-15.07)	3	0.80815	6.51309	0.000198389	71.153	51.546	71.153																0.797231	6.51309	0.000198389	71.153	13621000
PF3D7_0204200	145	145	PF3D7_0204200	conserved Plasmodium protein, unknown function	>PF3D7_0204200 organism=Plasmodium_falciparum_3D7 product=conserved Plasmodium protein, unknown function location=Pf3D7_02_v3:192818-194199(+) length=276 sequence_SO=chromosome SO=protein_coding	1	K	LSNEDVVKLKVLLLKKAIYFLPVCNKIFQDK	1	......KA.....	motif3	1	K(1)AIYFLPVCNK	FALSE	K(104.52)AIYFLPVCNK(-104.52)	2	0.62547	104.523	0.000315763	108.7	65.017	108.7																1	104.523	0.000315763	108.7	2614100
PF3D7_0204700	276	276	PF3D7_0204700	hexose transporter	>PF3D7_0204700 organism=Plasmodium_falciparum_3D7 product=hexose transporter (HT) location=Pf3D7_02_v3:205889-207403(-) length=504 sequence_SO=chromosome SO=protein_coding	1	K	PLNAIKEAVEQNESAKKNSLSLLSALKIPSY	10	.....AK......	motif5	0.978956	EAVEQNESAK(0.979)K(0.021)	FALSE	EAVEQNESAK(16.68)K(-16.68)	2	-0.22751	16.6764	2.81342e-13	182.28	117.57	127.51	0.978956	16.6764	0.000791189	127.51	23088000	0.947598	12.5728	6.84E-06	164.64	33119000	0.948246	12.6298	2.81342e-13	182.28	161460000	0.940899	12.0195	0.00216774	55.801
PF3D7_0204700	15	15	PF3D7_0204700	hexose transporter	>PF3D7_0204700 organism=Plasmodium_falciparum_3D7 product=hexose transporter (HT) location=Pf3D7_02_v3:205889-207403(-) length=504 sequence_SO=chromosome SO=protein_coding	1	K	_MTKSSKDICSENEGKKNGKSGFFSTSFKYV	9	.....GK......	motif4	0.985757	DICSENEGK(0.986)K(0.014)	FALSE	DICSENEGK(18.4)K(-18.4)	2	-0.77723	18.4017	0.00126748	112.71	67.958	112.71											0.985757	18.4017	0.00126748	112.71	69816000	0.906689	9.87525	0.00889096	73.499	16119000
PF3D7_0204700	6	6	PF3D7_0204700	hexose transporter	>PF3D7_0204700 organism=Plasmodium_falciparum_3D7 product=hexose transporter (HT) location=Pf3D7_02_v3:205889-207403(-) length=504 sequence_SO=chromosome SO=protein_coding	1	K	__________MTKSSKDICSENEGKKNGKSG	3			1	SSK(1)DICSENEGKK	FALSE	SSK(73.56)DICSENEGK(-73.56)K(-76.33)	3	-0.60353	73.5572	0.000169918	82.202	68.031	82.202																1	73.5572	0.000169918	82.202	7537800
PF3D7_0205900	660	660	PF3D7_0205900	26S proteasome regulatory subunit RPN1, putative	>PF3D7_0205900 organism=Plasmodium_falciparum_3D7 product=26S proteasome regulatory subunit RPN1, putative (RPN1) location=Pf3D7_02_v3:235237-238816(+) length=966 sequence_SO=chromosome SO=protein_coding	1	K	ANNTDNNKSSNADINKTTTTDTSKKTDNNNN	8	..A...K......	motif11	0.999999	SSNADINK(1)TTTTDTSK	FALSE	SSNADINK(62.69)TTTTDTSK(-62.69)	2	0.079715	62.6899	9.90291e-06	91.317	72.073	91.317																0.999999	62.6899	9.90291e-06	91.317	2414000
PF3D7_0205900	652	652	PF3D7_0205900	26S proteasome regulatory subunit RPN1, putative	>PF3D7_0205900 organism=Plasmodium_falciparum_3D7 product=26S proteasome regulatory subunit RPN1, putative (RPN1) location=Pf3D7_02_v3:235237-238816(+) length=966 sequence_SO=chromosome SO=protein_coding	1	K	NSDNKTTTANNTDNNKSSNADINKTTTTDTS	11			0.999951	TTTANNTDNNK(1)SSNADINK	FALSE	TTTANNTDNNK(43.07)SSNADINK(-43.07)	3	-0.77182	43.0692	1.11587e-07	70.783	52.549	70.783																0.999951	43.0692	1.11587e-07	70.783	9858400
PF3D7_0205900	668	668	PF3D7_0205900	26S proteasome regulatory subunit RPN1, putative	>PF3D7_0205900 organism=Plasmodium_falciparum_3D7 product=26S proteasome regulatory subunit RPN1, putative (RPN1) location=Pf3D7_02_v3:235237-238816(+) length=966 sequence_SO=chromosome SO=protein_coding	1	K	SSNADINKTTTTDTSKKTDNNNNNSSSNNKN	8			0.904806	TTTTDTSK(0.905)K(0.095)	FALSE	TTTTDTSK(9.78)K(-9.78)	2	0.1466	9.77948	0.00426359	101.65	84.406	101.65																0.904806	9.77948	0.00426359	101.65	18268000
PF3D7_0205900	912	912	PF3D7_0205900	26S proteasome regulatory subunit RPN1, putative	>PF3D7_0205900 organism=Plasmodium_falciparum_3D7 product=26S proteasome regulatory subunit RPN1, putative (RPN1) location=Pf3D7_02_v3:235237-238816(+) length=966 sequence_SO=chromosome SO=protein_coding	1	K	SVRVGQAVDIVGQAGKPKTITGFQTHVTPVL	13	.....GK......	motif4	0.801706	VGQAVDIVGQAGK(0.802)PK(0.198)	FALSE	VGQAVDIVGQAGK(6.07)PK(-6.07)	3	-0.41487	6.06707	0.000157289	67.234	57.952	67.234																0.801706	6.06707	0.000157289	67.234	9530800
PF3D7_0206200	3	3	PF3D7_0206200	pantothenate transporter	>PF3D7_0206200 organism=Plasmodium_falciparum_3D7 product=pantothenate transporter (PAT) location=Pf3D7_02_v3:249030-250727(+) length=565 sequence_SO=chromosome SO=protein_coding	1	K	_____________MAKNQYMEDRNIREPNTL	2			1	AK(1)NQYMEDR	FALSE	AK(67.33)NQYMEDR	2	-0.048319	67.3338	0.00141688	88.495	62.378	67.334																1	67.3338	0.00141688	88.495	24517000
PF3D7_0206200	52	52	PF3D7_0206200	pantothenate transporter	>PF3D7_0206200 organism=Plasmodium_falciparum_3D7 product=pantothenate transporter (PAT) location=Pf3D7_02_v3:249030-250727(+) length=565 sequence_SO=chromosome SO=protein_coding	1	K	SSIYKKVNSNRSKNGKHSMAFHKSLAVVNVA	3	.....GK......	motif4	1	NGK(1)HSMAFHK	FALSE	NGK(70.68)HSMAFHK(-70.68)	3	-0.55937	70.6751	0.000663437	85.355	59.796	85.355																1	70.6751	0.000663437	85.355	13557000
PF3D7_0206200	549	549	PF3D7_0206200	pantothenate transporter	>PF3D7_0206200 organism=Plasmodium_falciparum_3D7 product=pantothenate transporter (PAT) location=Pf3D7_02_v3:249030-250727(+) length=565 sequence_SO=chromosome SO=protein_coding	1	K	GKEYLKMNEIIQNEYKYDDEDEETIPEKKML	10			0.999903	MNEIIQNEYK(1)YDDEDEETIPEKK	FALSE	MNEIIQNEYK(43.03)YDDEDEETIPEK(-43.26)K(-43.03)	4	-0.58698	43.0342	3.14637e-07	55.705	50.121	55.705																0.999903	43.0342	3.14637e-07	55.705	41675000
PF3D7_0209800	252	252	PF3D7_0209800	ATP-dependent RNA helicase UAP56	>PF3D7_0209800 organism=Plasmodium_falciparum_3D7 product=ATP-dependent RNA helicase UAP56 (UAP56) location=Pf3D7_02_v3:404281-406355(-) length=457 sequence_SO=chromosome SO=protein_coding	1	K	DMRSDVQKIFISTPLKKQVMFFSATMAKEMR	8	......K.Q....	motif7	0.966512	IFISTPLK(0.967)K(0.033)	FALSE	IFISTPLK(14.6)K(-14.6)	2	0.17574	14.6031	0.00606343	95.358	38.442	95.358																0.966512	14.6031	0.00606343	95.358	19283000
PF3D7_0209800	41	41	PF3D7_0209800	ATP-dependent RNA helicase UAP56	>PF3D7_0209800 organism=Plasmodium_falciparum_3D7 product=ATP-dependent RNA helicase UAP56 (UAP56) location=Pf3D7_02_v3:404281-406355(-) length=457 sequence_SO=chromosome SO=protein_coding	1	K	DVKGNLGNNILNNNNKGGAMRGSYATVHTGG	13	......K..A...	motif6	1	GNLGNNILNNNNK(1)GGAMR	FALSE	GNLGNNILNNNNK(40.49)GGAMR	3	0.87258	40.4932	0.00114255	40.493	23.241	40.493																1	40.4932	0.00114255	40.493	5645800
PF3D7_0209800	299	299	PF3D7_0209800	ATP-dependent RNA helicase UAP56	>PF3D7_0209800 organism=Plasmodium_falciparum_3D7 product=ATP-dependent RNA helicase UAP56 (UAP56) location=Pf3D7_02_v3:404281-406355(-) length=457 sequence_SO=chromosome SO=protein_coding	1	K	DEAKLKLHGLLQHYVKLQEKDKTRKLIEILD	10	......K.Q....	motif7	0.985696	LHGLLQHYVK(0.986)LQEK(0.014)	FALSE	LHGLLQHYVK(18.38)LQEK(-18.38)	3	-0.32449	18.3829	0.000334792	61.167	52.826	61.167																0.985696	18.3829	0.000334792	61.167	10891000
PF3D7_0209800	244	244	PF3D7_0209800	ATP-dependent RNA helicase UAP56	>PF3D7_0209800 organism=Plasmodium_falciparum_3D7 product=ATP-dependent RNA helicase UAP56 (UAP56) location=Pf3D7_02_v3:404281-406355(-) length=457 sequence_SO=chromosome SO=protein_coding	1	K	CDKCLEKLDMRSDVQKIFISTPLKKQVMFFS	5			0.999995	SDVQK(1)IFISTPLKK	FALSE	SDVQK(53.96)IFISTPLK(-53.96)K(-58.39)	3	-0.0082248	53.9609	0.00040476	68.044	50.029	68.044																0.999995	53.9609	0.00040476	68.044	10775000
PF3D7_0210000	39	39	PF3D7_0210000	secretory complex protein 61 gamma subunit	>PF3D7_0210000 organism=Plasmodium_falciparum_3D7 product=secretory complex protein 61 gamma subunit (Sec61-gamma) location=Pf3D7_02_v3:409983-410228(+) length=81 sequence_SO=chromosome SO=protein_coding	1	K	QTFVEDSVRLIRKCTKPNKKEYTNIVYACSF	4			0.999928	KCTK(1)PNKK	FALSE	K(-61.72)CTK(41.45)PNK(-41.45)K(-70.5)	2	0.43426	41.448	0.0151849	143.04	44.579	138.4																0.999928	41.448	0.0151849	143.04	31433000
PF3D7_0210600	329	329	PF3D7_0210600	conserved protein, unknown function	>PF3D7_0210600 organism=Plasmodium_falciparum_3D7 product=conserved Plasmodium protein, unknown function location=Pf3D7_02_v3:432041-434086(-) length=446 sequence_SO=chromosome SO=protein_coding	1	K	SHKYFYIKYRKKNERKENYLYLKTIDKDRNI	1			1	K(1)ENYLYLK	FALSE	K(82.05)ENYLYLK(-82.05)	2	0.4486	82.0476	0.013804	96.668	22.367	95.502																1	82.0476	0.013804	96.668	21177000
PF3D7_0210600	39	39	PF3D7_0210600	conserved protein, unknown function	>PF3D7_0210600 organism=Plasmodium_falciparum_3D7 product=conserved Plasmodium protein, unknown function location=Pf3D7_02_v3:432041-434086(-) length=446 sequence_SO=chromosome SO=protein_coding	1	K	CICRNRELFPHISENKPIGQLYRLMNIHKYE	12	......K..G...	motif9	1	NRELFPHISENK(1)PIGQLYR	FALSE	NRELFPHISENK(48.38)PIGQLYR	4	-0.79265	48.3756	1.006e-09	120.32	101.74	48.376																1	48.3756	1.006e-09	120.32	22335000
PF3D7_0210600	99	99	PF3D7_0210600	conserved protein, unknown function	>PF3D7_0210600 organism=Plasmodium_falciparum_3D7 product=conserved Plasmodium protein, unknown function location=Pf3D7_02_v3:432041-434086(-) length=446 sequence_SO=chromosome SO=protein_coding	1	K	GNRYAYTHYHKQYQNKVHIEERKNMVVKQNN	5			1	QYQNK(1)VHIEER	FALSE	QYQNK(128.88)VHIEER	2	-0.26215	128.88	1.64411e-05	163.46	129.7	128.88																1	128.88	1.64411e-05	163.46	51128000
PF3D7_0210600	242	242	PF3D7_0210600	conserved protein, unknown function	>PF3D7_0210600 organism=Plasmodium_falciparum_3D7 product=conserved Plasmodium protein, unknown function location=Pf3D7_02_v3:432041-434086(-) length=446 sequence_SO=chromosome SO=protein_coding	1	K	STTIYKNISNLVLEDKIRLFCKNLNGYLLHS	10			1	NISNLVLEDK(1)IR	FALSE	NISNLVLEDK(63.09)IR	3	-0.11047	63.0912	0.000561467	71.176	50.116	63.091																1	63.0912	0.000561467	71.176	3620600
PF3D7_0210600	232	232	PF3D7_0210600	conserved protein, unknown function	>PF3D7_0210600 organism=Plasmodium_falciparum_3D7 product=conserved Plasmodium protein, unknown function location=Pf3D7_02_v3:432041-434086(-) length=446 sequence_SO=chromosome SO=protein_coding	1	K	HFEAIKETDLSTTIYKNISNLVLEDKIRLFC	10			0.999578	ETDLSTTIYK(1)NISNLVLEDK	FALSE	ETDLSTTIYK(33.75)NISNLVLEDK(-33.75)	3	-0.44521	33.7471	0.000119923	49.188	36.034	49.188																0.999578	33.7471	0.000119923	49.188	12471000
PF3D7_0210900	179	179	PF3D7_0210900	conserved Plasmodium protein, unknown function	>PF3D7_0210900 organism=Plasmodium_falciparum_3D7 product=conserved Plasmodium protein, unknown function location=Pf3D7_02_v3:442080-442934(-) length=284 sequence_SO=chromosome SO=protein_coding	1	K	TKRLNNYKTVSAPVKKFNNLNISLYRKNRTF	1	..A...K......	motif11	1	K(1)FNNLNISLYR	FALSE	K(68.79)FNNLNISLYR	3	-0.056851	68.7856	0.000398239	79.201	52.415	68.786																1	79.2014	0.000398239	79.201	9573200
PF3D7_0212100	1617	1617	PF3D7_0212100	conserved Plasmodium protein, unknown function	>PF3D7_0212100 organism=Plasmodium_falciparum_3D7 product=conserved Plasmodium protein, unknown function location=Pf3D7_02_v3:483436-488970(+) length=1844 sequence_SO=chromosome SO=protein_coding	1	K	MNPNSIRNMFILLRNKLSNLNVKNTMNSHSE	2			1	NK(1)LSNLNVK	FALSE	NK(88.09)LSNLNVK(-88.09)	2	-0.45648	88.0863	0.00318585	123.35	57.085	123.35						1	88.0863	0.00318585	123.35	7408000
PF3D7_0212500	2340	2340	PF3D7_0212500	conserved Plasmodium protein, unknown function	>PF3D7_0212500 organism=Plasmodium_falciparum_3D7 product=conserved Plasmodium protein, unknown function location=Pf3D7_02_v3:509525-521746(+) length=3990 sequence_SO=chromosome SO=protein_coding	1	K	IIICDYYKNKSIIKKKNIGNKKNFIYLSSTL	2	......K..G...	motif9	0.923096	K(0.077)K(0.923)NIGNK	FALSE	K(-10.79)K(10.79)NIGNK(-91.02)	2	0.75479	10.7929	0.0277897	94.407	7.5091	94.407																0.923096	10.7929	0.0277897	94.407	49022000
PF3D7_0213100	21	21	PF3D7_0213100	protein SIS1	>PF3D7_0213100 organism=Plasmodium_falciparum_3D7 product=protein SIS1 (SIS1) location=Pf3D7_02_v3:537789-539420(+) length=328 sequence_SO=chromosome SO=protein_coding	1	K	YSILGVSRDCTTNDLKKAYRKLAMMWHPDKH	8	......K.A....	motif1	0.984986	DCTTNDLK(0.985)K(0.015)	FALSE	DCTTNDLK(18.17)K(-18.17)	2	-2.2238	18.1695	0.015102	73.233	35.1	73.233																0.984986	18.1695	0.015102	73.233	4430500
PF3D7_0213100	250	250	PF3D7_0213100	protein SIS1	>PF3D7_0213100 organism=Plasmodium_falciparum_3D7 product=protein SIS1 (SIS1) location=Pf3D7_02_v3:537789-539420(+) length=328 sequence_SO=chromosome SO=protein_coding	1	K	RDANHLIYKCPVPLDKALTGFQFIVKSLDNR	7	......KA.....	motif3	0.999993	CPVPLDK(1)ALTGFQFIVK	FALSE	CPVPLDK(51.5)ALTGFQFIVK(-51.5)	3	-0.077592	51.4954	3.04108e-05	58.814	45.974	58.814																0.999993	51.4954	3.04108e-05	58.814	12604000
PF3D7_0213100	181	181	PF3D7_0213100	protein SIS1	>PF3D7_0213100 organism=Plasmodium_falciparum_3D7 product=protein SIS1 (SIS1) location=Pf3D7_02_v3:537789-539420(+) length=328 sequence_SO=chromosome SO=protein_coding	1	K	CKKKLKITRKRFMGTKSYEDDNYVTIDVKAG	5			0.999992	FMGTK(1)SYEDDNYVTIDVK	FALSE	FMGTK(51.12)SYEDDNYVTIDVK(-51.12)	3	-0.84231	51.1233	3.64703e-05	54.764	46.679	54.764																0.999992	51.1233	3.64703e-05	54.764	33814000
PF3D7_0214800	152	152	PF3D7_0214800	conserved Plasmodium membrane protein, unknown function	>PF3D7_0214800 organism=Plasmodium_falciparum_3D7 product=conserved Plasmodium membrane protein, unknown function location=Pf3D7_02_v3:605045-609325(+) length=1371 sequence_SO=chromosome SO=protein_coding	2	K	RRRIRAREYNNAKYNKNRYKMNKYNRNKNIN	9	..A...K......	motif11	1	EYNNAK(1)YNK(1)NR	FALSE	EYNNAK(68.66)YNK(68.66)NR	3	-0.086177	68.657	0.00360675	88.495	81.13	68.657											1	68.657	0.00360675	88.495	16951000
PF3D7_0214800	149	149	PF3D7_0214800	conserved Plasmodium membrane protein, unknown function	>PF3D7_0214800 organism=Plasmodium_falciparum_3D7 product=conserved Plasmodium membrane protein, unknown function location=Pf3D7_02_v3:605045-609325(+) length=1371 sequence_SO=chromosome SO=protein_coding		K	RRRRRRIRAREYNNAKYNKNRYKMNKYNRNK	6	.....AK......	motif5	1	EYNNAK(1)YNK(1)NR	FALSE	EYNNAK(68.66)YNK(68.66)NR	3	-0.086177	68.657	0.00360675	117.39	80.831	68.657											1	68.657	0.00360675	117.39	145310000
PF3D7_0217500	317	317	PF3D7_0217500	calcium-dependent protein kinase 1	>PF3D7_0217500 organism=Plasmodium_falciparum_3D7 product=calcium-dependent protein kinase 1 (CDPK1) location=Pf3D7_02_v3:720437-722661(+) length=524 sequence_SO=chromosome SO=protein_coding	1	K	IKLMLTYDYNKRITAKEALNSKWIKKYANNI	4	......K.A....	motif1	0.999976	ITAK(1)EALNSK	FALSE	ITAK(46.28)EALNSK(-46.28)	2	-0.29408	46.2805	0.00530372	90.05	41.489	90.05											0.999976	46.2805	0.00530372	90.05	2721600	0.99968	34.9497	0.010007	77.288
PF3D7_0217500	334	334	PF3D7_0217500	calcium-dependent protein kinase 1	>PF3D7_0217500 organism=Plasmodium_falciparum_3D7 product=calcium-dependent protein kinase 1 (CDPK1) location=Pf3D7_02_v3:720437-722661(+) length=524 sequence_SO=chromosome SO=protein_coding	1	K	ALNSKWIKKYANNINKSDQKTLCGALSNMRK	7	.A....K......	motif11	0.99839	YANNINK(0.998)SDQK(0.002)	FALSE	YANNINK(27.92)SDQK(-27.92)	2	0.1922	27.9248	0.0212121	55.353	44.804	55.353																0.99839	27.9248	0.0212121	55.353	3257000
PF3D7_0219400.1	34	34	PF3D7_0219400.1	ribosome associated membrane protein RAMP4, putative, unspecified product	>PF3D7_0219400.1 organism=Plasmodium_falciparum_3D7 product=ribosome associated membrane protein RAMP4, putative location=Pf3D7_02_v3:774815-776036(+) length=101 sequence_SO=chromosome SO=protein_coding	1	K	SIKKAQKKYKSNILNKMPSNRKITQKVEAFD	6			1	SNILNK(1)MPSNR	FALSE	SNILNK(56.09)MPSNR	2	-0.038332	56.0867	0.000514578	74.611	67.001	56.087																1	43.6798	0.000514578	74.611	5589500
PF3D7_0219400.1	28	28	PF3D7_0219400.1	ribosome associated membrane protein RAMP4, putative, unspecified product	>PF3D7_0219400.1 organism=Plasmodium_falciparum_3D7 product=ribosome associated membrane protein RAMP4, putative location=Pf3D7_02_v3:774815-776036(+) length=101 sequence_SO=chromosome SO=protein_coding	1	K	EKSFYKSIKKAQKKYKSNILNKMPSNRKITQ	2	.A....K......	motif11	1	YK(1)SNILNK	FALSE	YK(120.9)SNILNK(-120.9)	2	0.33792	120.902	0.00513471	156.35	58.712	156.35																1	109.053	0.00513471	139.74	53768000
PF3D7_0219400.1	14	14	PF3D7_0219400.1	ribosome associated membrane protein RAMP4, putative, unspecified product	>PF3D7_0219400.1 organism=Plasmodium_falciparum_3D7 product=ribosome associated membrane protein RAMP4, putative location=Pf3D7_02_v3:774815-776036(+) length=101 sequence_SO=chromosome SO=protein_coding	1	K	__MDNIQDYIKKLKEKSFYKSIKKAQKKYKS	4			0.999838	LKEK(1)SFYK	FALSE	LK(-38.36)EK(38.36)SFYK(-47.91)	2	-0.53992	38.3551	0.0318887	80.755	26.999	80.231																0.999838	38.3551	0.0318887	80.755
PF3D7_0219400.1	9	9	PF3D7_0219400.1	ribosome associated membrane protein RAMP4, putative, unspecified product	>PF3D7_0219400.1 organism=Plasmodium_falciparum_3D7 product=ribosome associated membrane protein RAMP4, putative location=Pf3D7_02_v3:774815-776036(+) length=101 sequence_SO=chromosome SO=protein_coding	1	K	_______MDNIQDYIKKLKEKSFYKSIKKAQ	9			0.883863	MDNIQDYIK(0.884)K(0.116)	FALSE	MDNIQDYIK(8.81)K(-8.81)	2	0.79851	8.81416	0.00841388	63.073	46.16	63.073																0.883863	8.81416	0.00841388	63.073	10982000
PF3D7_0219400.1;PF3D7_0219400.2		64	PF3D7_0219400.1	ribosome associated membrane protein RAMP4, putative, unspecified product	>PF3D7_0219400.1 organism=Plasmodium_falciparum_3D7 product=ribosome associated membrane protein RAMP4, putative location=Pf3D7_02_v3:774815-776036(+) length=101 sequence_SO=chromosome SO=protein_coding;>PF3D7_0219400.2 organism=Plasmodium_falciparum_3D7	1	K	DSNVTKRGNVPPSLVKKGRKHPVGPILLVVF	9			0.967603	GNVPPSLVK(0.968)K(0.032)	FALSE	GNVPPSLVK(14.75)K(-14.75)	2	0.38314	14.7519	0.0118981	67.334	46.335	51.436																0.967603	14.7519	0.0334432	51.436	8633500
PF3D7_0219400.1;PF3D7_0219400.2		44	PF3D7_0219400.1	ribosome associated membrane protein RAMP4, putative, unspecified product	>PF3D7_0219400.1 organism=Plasmodium_falciparum_3D7 product=ribosome associated membrane protein RAMP4, putative location=Pf3D7_02_v3:774815-776036(+) length=101 sequence_SO=chromosome SO=protein_coding;>PF3D7_0219400.2 organism=Plasmodium_falciparum_3D7	1	K	SNILNKMPSNRKITQKVEAFDSNVTKRGNVP	4	......K..A...	motif6	0.999995	ITQK(1)VEAFDSNVTK	FALSE	ITQK(53.17)VEAFDSNVTK(-53.17)	3	0.12858	53.1703	0.000399639	58.885	45.451	58.885																0.999995	53.1703	0.000399639	58.885	14035000
PF3D7_0219400.1;PF3D7_0219400.2		54	PF3D7_0219400.1	ribosome associated membrane protein RAMP4, putative, unspecified product	>PF3D7_0219400.1 organism=Plasmodium_falciparum_3D7 product=ribosome associated membrane protein RAMP4, putative location=Pf3D7_02_v3:774815-776036(+) length=101 sequence_SO=chromosome SO=protein_coding;>PF3D7_0219400.2 organism=Plasmodium_falciparum_3D7	1	K	RKITQKVEAFDSNVTKRGNVPPSLVKKGRKH	10			1	VEAFDSNVTK(1)R	FALSE	VEAFDSNVTK(50.35)R	3	-0.75283	50.3537	0.000436986	141.08	95.651	50.354																1	50.3537	0.000436986	141.08	54357000
PF3D7_0219600	160	160	PF3D7_0219600	replication factor C subunit 1, putative	>PF3D7_0219600 organism=Plasmodium_falciparum_3D7 product=replication factor C subunit 1, putative (RFC1) location=Pf3D7_02_v3:779418-782132(-) length=904 sequence_SO=chromosome SO=protein_coding	1	K	EDTKSNNVSPKNEINKSNVKRERESEQYEIS	5			0.997977	NEINK(0.998)SNVK(0.002)	FALSE	NEINK(26.93)SNVK(-26.93)	2	-0.92954	26.932	0.0177747	80.688	15.436	80.688																0.997977	26.932	0.0177747	80.688	2198200
PF3D7_0222100;PF3D7_0114100;PF3D7_1101700;PF3D7_1039700;PF3D7_0631400;PF3D7_0324100;PF3D7_0601200;PF3D7_0101300		110	PF3D7_0222100	Pfmc-2TM Maurer's cleft two transmembrane protein	>PF3D7_0222100 organism=Plasmodium_falciparum_3D7 product=Pfmc-2TM Maurer's cleft two transmembrane protein (MC-2TM) location=Pf3D7_02_v3:878468-879251(-) length=229 sequence_SO=chromosome SO=protein_coding;>PF3D7_0114100 organism=Plasmodium_falciparum_3D	1	K	KIKNLSLKYINSRDVKEKNESINELQKYSNN	3			0.947023	DVK(0.947)EK(0.053)NESINELQK	FALSE	DVK(12.52)EK(-12.52)NESINELQK(-71.31)	3	-0.28405	12.5227	9.06718e-05	92.265	61.69	85.909						0.947023	12.5227	9.07E-05	92.265	29714000
PF3D7_0301700	30	30	PF3D7_0301700	Plasmodium exported protein, unknown function	>PF3D7_0301700 organism=Plasmodium_falciparum_3D7 product=Plasmodium exported protein, unknown function location=Pf3D7_03_v3:96568-97907(-) length=317 sequence_SO=chromosome SO=protein_coding	1	K	NNVQCTMGRSSQNINKSDSKGKIKRCTYAYK	7			0.965398	SSQNINK(0.965)SDSK(0.035)	FALSE	SSQNINK(14.46)SDSK(-14.46)	2	0.25144	14.4561	0.035088	51.135	36.235	51.135											0.965398	14.4561	0.035088	51.135	3869900
PF3D7_0304100	318	318	PF3D7_0304100	inner membrane complex protein 1e, putative	>PF3D7_0304100 organism=Plasmodium_falciparum_3D7 product=inner membrane complex protein 1e, putative (IMC1e) location=Pf3D7_03_v3:204542-206119(+) length=525 sequence_SO=chromosome SO=protein_coding	1	K	QIVQEFLCPKIEARYKEIPVPVHVQRIIEHP	2			1	YK(1)EIPVPVHVQR	FALSE	YK(46.07)EIPVPVHVQR	3	0.05857	46.0691	0.00313842	46.069	38.203	46.069																1	46.0691	0.00313842	46.069	5080200
PF3D7_0304100	362	362	PF3D7_0304100	inner membrane complex protein 1e, putative	>PF3D7_0304100 organism=Plasmodium_falciparum_3D7 product=inner membrane complex protein 1e, putative (IMC1e) location=Pf3D7_03_v3:204542-206119(+) length=525 sequence_SO=chromosome SO=protein_coding	1	K	LYYQEDNNIEMSTNKKNTMEQNKNKNCFIFN	1			0.999997	K(1)NTMEQNK	FALSE	K(54.86)NTMEQNK(-54.86)	2	0.17361	54.8583	0.0094692	107.57	8.5778	107.57																0.999997	54.8583	0.0094692	107.57	5586700
PF3D7_0304100	369	369	PF3D7_0304100	inner membrane complex protein 1e, putative	>PF3D7_0304100 organism=Plasmodium_falciparum_3D7 product=inner membrane complex protein 1e, putative (IMC1e) location=Pf3D7_03_v3:204542-206119(+) length=525 sequence_SO=chromosome SO=protein_coding	1	K	NIEMSTNKKNTMEQNKNKNCFIFNLNRNDSR	7			0.876721	NTMEQNK(0.877)NK(0.123)	FALSE	NTMEQNK(8.52)NK(-8.52)	2	-0.11665	8.51973	0.0334854	54.982	28.598	54.982																0.876721	8.51973	0.0334854	54.982
PF3D7_0304200	159	159	PF3D7_0304200	EH domain-containing protein	>PF3D7_0304200 organism=Plasmodium_falciparum_3D7 product=EH (Eps15 homology) protein (PAST1) location=Pf3D7_03_v3:207342-208919(-) length=525 sequence_SO=chromosome SO=protein_coding	1	K	KSVTIIDTPGVLSGIKQISRGYDFEKVIYWF	15			1	SVTIIDTPGVLSGIK(1)QISR	FALSE	SVTIIDTPGVLSGIK(45.92)QISR	3	0.087378	45.9158	0.000239296	45.916	41.435	45.916																1	45.9158	0.000239296	45.916	6676900
PF3D7_0306300	34	34	PF3D7_0306300	glutaredoxin 1	>PF3D7_0306300 organism=Plasmodium_falciparum_3D7 product=glutaredoxin 1 (GRX1) location=Pf3D7_03_v3:295107-296094(-) length=111 sequence_SO=chromosome SO=protein_coding	1	K	NIIAVFAKTECPYCIKAISILKGYNLNSHMH	8	......KA.....	motif3	0.999975	TECPYCIK(1)AISILK	FALSE	TECPYCIK(46.07)AISILK(-46.07)	3	-0.4451	46.0729	9.13009e-06	111.12	100.39	111.12																0.999975	46.0729	9.13009e-06	111.12	49810000
PF3D7_0307100	30	30	PF3D7_0307100	40S ribosomal protein S12, putative	>PF3D7_0307100 organism=Plasmodium_falciparum_3D7 product=40S ribosomal protein S12, putative location=Pf3D7_03_v3:312693-313342(-) length=141 sequence_SO=chromosome SO=protein_coding	1	K	EKAVFDNVTAIQKVIKNAHVHDGLKIGIREV	3	......K.A....	motif1	1	VIK(1)NAHVHDGLK	FALSE	VIK(79.61)NAHVHDGLK(-79.61)	3	0.25731	79.6074	3.93737e-05	124.12	85.341	100.04						1	79.6074	3.94E-05	124.12	52482000	0.999663	34.7239	0.00300613	46.643	4518300	0.999998	57.9941	0.000152635	76.326	20458000
PF3D7_0307200	210	210	PF3D7_0307200	60S ribosomal protein L7, putative	>PF3D7_0307200 organism=Plasmodium_falciparum_3D7 product=60S ribosomal protein L7, putative location=Pf3D7_03_v3:314976-316236(-) length=257 sequence_SO=chromosome SO=protein_coding	1	K	EDMVYQLYTCGPVFKKVNNFLWAFKLKPPRK	1			1	K(1)VNNFLWAFK	FALSE	K(79.04)VNNFLWAFK(-79.04)	2	-0.077567	79.0376	0.000766062	137.95	100.4	99.815						0.999999	60.3731	0.0104703	70.028	6786800						1	79.0376	0.000766062	137.95	25348000
PF3D7_0307500	357	357	PF3D7_0307500	spindle and kinetochore-associated protein 2, putative	>PF3D7_0307500 organism=Plasmodium_falciparum_3D7 product=conserved protein, unknown function location=Pf3D7_03_v3:322933-324836(-) length=389 sequence_SO=chromosome SO=protein_coding	1	K	FGQTGEAKIATLRYLKIIEVLNKNSSVRLLQ	3	A.....K......	motif8	0.999999	YLK(1)IIEVLNK	FALSE	YLK(60.65)IIEVLNK(-60.65)	2	0.13623	60.6525	0.0128751	76.282	34.834	76.282																0.999999	60.6525	0.0128751	76.282	8010100
PF3D7_0307700	895	895	PF3D7_0307700	conserved Plasmodium protein, unknown function	>PF3D7_0307700 organism=Plasmodium_falciparum_3D7 product=conserved Plasmodium protein, unknown function location=Pf3D7_03_v3:328787-335269(-) length=1826 sequence_SO=chromosome SO=protein_coding	1	K	NLNNNINRNRNIYMHKNRISNEQNNKFNLNN	6			1	NIYMHK(1)NR	FALSE	NIYMHK(47.08)NR	3	0.31743	47.0817	0.015211	47.082	26.561	47.082																1	47.0817	0.015211	47.082	10645000
PF3D7_0307700	952	952	PF3D7_0307700	conserved Plasmodium protein, unknown function	>PF3D7_0307700 organism=Plasmodium_falciparum_3D7 product=conserved Plasmodium protein, unknown function location=Pf3D7_03_v3:328787-335269(-) length=1826 sequence_SO=chromosome SO=protein_coding	1	K	NQEYNKNYIYRNEYYKNEKNVYLDSYPYEMV	5			0.999611	NEYYK(1)NEK	FALSE	NEYYK(34.1)NEK(-34.1)	2	0.45844	34.1027	0.00930287	124.74	58.176	124.74																0.999611	34.1027	0.00930287	124.74	25966000
PF3D7_0308300	26	26	PF3D7_0308300	conserved Plasmodium protein, unknown function	>PF3D7_0308300 organism=Plasmodium_falciparum_3D7 product=conserved Plasmodium protein, unknown function location=Pf3D7_03_v3:365659-366672(-) length=337 sequence_SO=chromosome SO=protein_coding	1	K	NLSQVSSELSCCKNKKFHVDNVSLCGIEDVL	1			1	K(1)FHVDNVSLCGIEDVLHNR	FALSE	K(48.29)FHVDNVSLCGIEDVLHNR	4	0.15758	48.2881	0.000239432	48.288	45.233	48.288																1	48.2881	0.000239432	48.288	6584500
PF3D7_0309500	531	531	PF3D7_0309500	asparagine synthetase [glutamine-hydrolyzing], putative	>PF3D7_0309500 organism=Plasmodium_falciparum_3D7 product=asparagine synthetase, putative location=Pf3D7_03_v3:402933-405440(+) length=610 sequence_SO=chromosome SO=protein_coding	1	K	FSRAKFLFPYNTPKTKEGYLYRCIFSECFPE	2			1	TK(1)EGYLYR	FALSE	TK(89.35)EGYLYR	2	0.38301	89.3546	0.0284369	89.355	69.121	89.355																1	89.3546	0.0284369	89.355	10966000
PF3D7_0309600	62	62	PF3D7_0309600	60S acidic ribosomal protein P2	>PF3D7_0309600 organism=Plasmodium_falciparum_3D7 product=60S acidic ribosomal protein P2 (PfP2) location=Pf3D7_03_v3:407980-408318(+) length=112 sequence_SO=chromosome SO=protein_coding	1	K	SLKGKSCHELITDGLKKLQNIGGGVAAAPAG	11			0.865688	SCHELITDGLK(0.866)K(0.134)	FALSE	SCHELITDGLK(8.09)K(-8.09)	3	0.4665	8.09245	0.00105676	57.175	45.592	48.568						0.865688	8.09245	0.00112967	56.087	62800000						0.855589	7.72666	0.00105676	57.175	26556000
PF3D7_0312800	51	51	PF3D7_0312800	60S ribosomal protein L26, putative	>PF3D7_0312800 organism=Plasmodium_falciparum_3D7 product=60S ribosomal protein L26, putative location=Pf3D7_03_v3:534239-535238(+) length=126 sequence_SO=chromosome SO=protein_coding	1	K	KELRLKYKTRSLPVRKDDEVLICRGHNHGRE	6			1	SLPVRK(1)DDEVLICR	FALSE	SLPVRK(55.72)DDEVLICR	3	-0.44503	55.7239	0.00136852	55.724	39.195	55.724						1	55.7239	0.00136852	55.724	7582900
PF3D7_0314100.1	147	147	PF3D7_0314100.1	vesicle transport v-SNARE protein, putative	>PF3D7_0314100.1 organism=Plasmodium_falciparum_3D7 product=vesicle transport v-SNARE protein, putative location=Pf3D7_03_v3:569308-571051(-) length=198 sequence_SO=chromosome SO=protein_coding	1	K	IMSELNSQRSAILRTKHHTDETRQEQNRVKR	2	.A....K......	motif11	1	TK(1)HHTDETR	FALSE	TK(42.34)HHTDETR	3	-0.069681	42.3359	0.00771852	51.445	40.688	42.336																1	51.4453	0.00771852	51.445	8475000
PF3D7_0316700	24	24	PF3D7_0316700	protein YOP1, putative	>PF3D7_0316700 organism=Plasmodium_falciparum_3D7 product=HVA22/TB2/DP1 family protein, putative location=Pf3D7_03_v3:674458-675636(+) length=221 sequence_SO=chromosome SO=protein_coding	1	K	HKEKEDRPNTSLNSLKRISSNVFGEKLNNLD	14			0.999995	EKEDRPNTSLNSLK(1)R	FALSE	EK(-53.02)EDRPNTSLNSLK(53.02)R	3	0.88504	53.0235	0.000457926	56.527	40.97	56.527																0.999995	53.0235	0.000457926	56.527	7936100
PF3D7_0316700	34	34	PF3D7_0316700	protein YOP1, putative	>PF3D7_0316700 organism=Plasmodium_falciparum_3D7 product=HVA22/TB2/DP1 family protein, putative location=Pf3D7_03_v3:674458-675636(+) length=221 sequence_SO=chromosome SO=protein_coding	1	K	SLNSLKRISSNVFGEKLNNLDVSRVFNNIDD	9			1	ISSNVFGEK(1)LNNLDVSR	FALSE	ISSNVFGEK(57.53)LNNLDVSR	3	-0.19974	57.5251	3.44873e-05	57.525	49.611	57.525																1	57.5251	3.44873e-05	57.525	7178900
PF3D7_0317600	59	59	PF3D7_0317600	40S ribosomal protein S11, putative	>PF3D7_0317600 organism=Plasmodium_falciparum_3D7 product=40S ribosomal protein S11, putative (RPS11) location=Pf3D7_03_v3:725015-726130(+) length=161 sequence_SO=chromosome SO=protein_coding	1	K	GFATPKEAKEGVYVDKKCPFTGNVSIRGRIL	7			0.983596	EGVYVDK(0.984)K(0.016)	FALSE	EGVYVDK(17.78)K(-17.78)	2	1.3861	17.7786	0.03307	67.494	31.875	67.494											0.983596	17.7786	0.03307	67.494	3056800
PF3D7_0318700	78	78	PF3D7_0318700	conserved Plasmodium protein, unknown function	>PF3D7_0318700 organism=Plasmodium_falciparum_3D7 product=trophozoite stage antigen location=Pf3D7_03_v3:788453-788812(+) length=119 sequence_SO=chromosome SO=protein_coding	1	K	VFTTLNDKVILPSQLKKVNSKDMNIPTELTH	8			0.98135	VILPSQLK(0.981)K(0.019)	FALSE	VILPSQLK(17.21)K(-17.21)	2	-0.2016	17.2115	0.00848208	76.679	29.492	68.016																0.98135	17.2115	0.0169876	70.256	20979000
PF3D7_0318700	25	25	PF3D7_0318700	conserved Plasmodium protein, unknown function	>PF3D7_0318700 organism=Plasmodium_falciparum_3D7 product=trophozoite stage antigen location=Pf3D7_03_v3:788453-788812(+) length=119 sequence_SO=chromosome SO=protein_coding	1	K	KLYKSLYIKEKGGYGKNNKKAKKLSLRTQVS	5	.....GK......	motif4	0.939413	GGYGK(0.939)NNK(0.059)K(0.001)	FALSE	GGYGK(11.98)NNK(-11.98)K(-29.34)	2	-1.2123	11.9839	0.000386801	114.5	37.651	114.5																0.939413	11.9839	0.000386801	114.5	10522000
PF3D7_0318900	131	131	PF3D7_0318900	conserved protein, unknown function	>PF3D7_0318900 organism=Plasmodium_falciparum_3D7 product=conserved protein, unknown function location=Pf3D7_03_v3:791840-793481(-) length=440 sequence_SO=chromosome SO=protein_coding	1	K	CKEIFIENFAKVGNDKSFLLEKSYDNYEFYC	5	A.....K......	motif8	0.999998	VGNDK(1)SFLLEK	FALSE	VGNDK(56.71)SFLLEK(-56.71)	2	0.36764	56.7066	0.000754303	79.492	34.059	70.942																0.999998	56.7066	0.000754303	70.942	9412600
PF3D7_0318900	411	411	PF3D7_0318900	conserved protein, unknown function	>PF3D7_0318900 organism=Plasmodium_falciparum_3D7 product=conserved protein, unknown function location=Pf3D7_03_v3:791840-793481(-) length=440 sequence_SO=chromosome SO=protein_coding	1	K	KKKAKKIQEEKEKVEKMSAEQQRKYEEKKQK	3	......K..A...	motif6	1	VEK(1)MSAEQQR	FALSE	VEK(72.2)MSAEQQR	2	-0.21566	72.2004	9.41845e-05	134.98	79.624	72.2																1	72.2004	9.41845e-05	134.98	59799000
PF3D7_0318900	381	381	PF3D7_0318900	conserved protein, unknown function	>PF3D7_0318900 organism=Plasmodium_falciparum_3D7 product=conserved protein, unknown function location=Pf3D7_03_v3:791840-793481(-) length=440 sequence_SO=chromosome SO=protein_coding	1	K	EKVRDNVKKLRYMVEKDDIKRKQELRELQEK	5			0.999356	YMVEK(0.999)DDIK(0.001)R	FALSE	YMVEK(31.91)DDIK(-31.91)R	3	-0.051358	31.9103	0.00320637	76.228	58.997	76.228																0.999356	31.9103	0.00320637	76.228	9744200
PF3D7_0318900	406	406	PF3D7_0318900	conserved protein, unknown function	>PF3D7_0318900 organism=Plasmodium_falciparum_3D7 product=conserved protein, unknown function location=Pf3D7_03_v3:791840-793481(-) length=440 sequence_SO=chromosome SO=protein_coding	1	K	RELQEKKKAKKIQEEKEKVEKMSAEQQRKYE	5			0.96762	IQEEK(0.968)EK(0.032)VEK	FALSE	IQEEK(14.76)EK(-14.76)VEK(-51.7)	3	-0.053339	14.7552	0.00498715	67.334	31.792	67.334																0.96762	14.7552	0.00498715	67.334	22957000
PF3D7_0318900	325	325	PF3D7_0318900	conserved protein, unknown function	>PF3D7_0318900 organism=Plasmodium_falciparum_3D7 product=conserved protein, unknown function location=Pf3D7_03_v3:791840-793481(-) length=440 sequence_SO=chromosome SO=protein_coding	1	K	NKNIDDNNKKKEENVKTEKQKYCYLNLIIPK	7			1	KKEENVK(1)TEK	FALSE	K(-93.92)K(-90.15)EENVK(82.2)TEK(-82.2)	2	-0.66416	82.2031	2.45846e-12	226.29	83.254	168.02																1	82.2031	2.45846e-12	226.29	192380000
PF3D7_0320100	179	179	PF3D7_0320100	protein transport protein SEC22	>PF3D7_0320100 organism=Plasmodium_falciparum_3D7 product=protein transport protein SEC22 (SEC22) location=Pf3D7_03_v3:840362-841758(+) length=221 sequence_SO=chromosome SO=protein_coding	1	K	RGENLEDVGRKAFNLKYESEKFKKVSRVLNL	5	..A...K......	motif11	0.98199	AFNLK(0.982)YESEK(0.018)	FALSE	AFNLK(17.37)YESEK(-17.37)	2	-0.51485	17.3658	0.0165801	44.847	22.841	44.847																0.98199	17.3658	0.0165801	44.847
PF3D7_0320100	184	184	PF3D7_0320100	protein transport protein SEC22	>PF3D7_0320100 organism=Plasmodium_falciparum_3D7 product=protein transport protein SEC22 (SEC22) location=Pf3D7_03_v3:840362-841758(+) length=221 sequence_SO=chromosome SO=protein_coding	1	K	EDVGRKAFNLKYESEKFKKVSRVLNLKYALY	5			0.975192	YESEK(0.975)FK(0.025)K	FALSE	YESEK(15.97)FK(-15.97)K(-38.19)	2	0.21921	15.9709	0.0276805	124.98	38.189	124.98																0.975192	15.9709	0.0276805	124.98	44563000
PF3D7_0320900	19	19	PF3D7_0320900	histone H2A.Z	>PF3D7_0320900 organism=Plasmodium_falciparum_3D7 product=histone H2A variant, putative (H2A.Z) location=Pf3D7_03_v3:875213-876295(+) length=158 sequence_SO=chromosome SO=protein_coding	1	K	PGKVIGGKVGGKVGGKVLGLGKGGKGKTGSG	4	.....GK......	motif4	0.999997	VGGK(1)VLGLGK	FALSE	VGGK(54.61)VLGLGK(-54.61)	2	-0.18757	54.6097	0.00984102	80.231	44.786	80.231											0.998571	28.4446	0.0442549	54.066	2494900	0.999997	54.6097	0.00984102	80.231	3224500
PF3D7_0320900	25	25	PF3D7_0320900	histone H2A.Z	>PF3D7_0320900 organism=Plasmodium_falciparum_3D7 product=histone H2A variant, putative (H2A.Z) location=Pf3D7_03_v3:875213-876295(+) length=158 sequence_SO=chromosome SO=protein_coding	1	K	GKVGGKVGGKVLGLGKGGKGKTGSGKTKKAP	6	.....GK......	motif4	0.89676	VLGLGK(0.897)GGK(0.103)	FALSE	VLGLGK(9.39)GGK(-9.39)	2	0.12806	9.38827	0.0150949	69.825	17.141	69.825											0.891832	9.16184	0.0150949	69.598	5549400	0.89676	9.38827	0.0291454	69.825	2990700
PF3D7_0320900	6	6	PF3D7_0320900	histone H2A.Z	>PF3D7_0320900 organism=Plasmodium_falciparum_3D7 product=histone H2A variant, putative (H2A.Z) location=Pf3D7_03_v3:875213-876295(+) length=158 sequence_SO=chromosome SO=protein_coding	1	K	__________MEVPGKVIGGKVGGKVGGKVL	6			0.956357	MEVPGK(0.956)VIGGK(0.044)	FALSE	MEVPGK(13.41)VIGGK(-13.41)	2	-0.36269	13.4071	0.00549312	45.661	23.668	45.661																0.956357	13.4071	0.00549312	45.661	8406600
PF3D7_0320900	11	11	PF3D7_0320900	histone H2A.Z	>PF3D7_0320900 organism=Plasmodium_falciparum_3D7 product=histone H2A variant, putative (H2A.Z) location=Pf3D7_03_v3:875213-876295(+) length=158 sequence_SO=chromosome SO=protein_coding	1	K	_____MEVPGKVIGGKVGGKVGGKVLGLGKG	5	.....GK......	motif4	0.995213	VIGGK(0.995)VGGK(0.005)	FALSE	VIGGK(23.18)VGGK(-23.18)	2	-0.27509	23.1781	0.0365942	65.465	6.9139	65.465																0.995213	23.1781	0.0365942	65.465	6755900
PF3D7_0321400	168	168	PF3D7_0321400	protein kinase, putative	>PF3D7_0321400 organism=Plasmodium_falciparum_3D7 product=protein kinase, putative location=Pf3D7_03_v3:894761-896112(+) length=319 sequence_SO=chromosome SO=protein_coding	1	K	FKDEDRKEIRVSLLSKNSKYDNFDEDGNLYG	6			0.993378	VSLLSK(0.993)NSK(0.007)	FALSE	VSLLSK(21.76)NSK(-21.76)	2	-0.12479	21.7611	0.00423688	118.71	31.072	70.363																0.993378	21.7611	0.0145511	86.882	14673000
PF3D7_0322300	374	374	PF3D7_0322300	diacylglycerol O-acyltransferase	>PF3D7_0322300 organism=Plasmodium_falciparum_3D7 product=diacylglycerol O-acyltransferase (DGAT) location=Pf3D7_03_v3:938212-940173(-) length=653 sequence_SO=chromosome SO=protein_coding	1	K	FFKFYSFHEVCYEARKLHIENVDLKNLIEDD	1	....A.K......	motif10	0.999926	K(1)LHIENVDLK	FALSE	K(41.31)LHIENVDLK(-41.31)	3	-0.080405	41.3106	0.00383604	56.404	27.447	48.284																0.999926	41.3106	0.00383604	56.404	14206000
PF3D7_0322900	50	50	PF3D7_0322900	40S ribosomal protein S3A, putative	>PF3D7_0322900 organism=Plasmodium_falciparum_3D7 product=40S ribosomal protein S3A, putative location=Pf3D7_03_v3:965553-966502(-) length=262 sequence_SO=chromosome SO=protein_coding	1	K	PKMFLVRNFGKTLVTKTIGKKLATDSLKGRI	5	......K..G...	motif9	0.999888	TLVTK(1)TIGK	FALSE	TLVTK(39.49)TIGK(-39.49)	2	0.89351	39.4925	0.0122488	70.056	40.289	70.056											0.999888	39.4925	0.0122488	70.056
PF3D7_0322900	45	45	PF3D7_0322900	40S ribosomal protein S3A, putative	>PF3D7_0322900 organism=Plasmodium_falciparum_3D7 product=40S ribosomal protein S3A, putative location=Pf3D7_03_v3:965553-966502(-) length=262 sequence_SO=chromosome SO=protein_coding	1	K	YDLKAPKMFLVRNFGKTLVTKTIGKKLATDS	4	.....GK......	motif4	0.999453	NFGK(0.999)TLVTK(0.001)	FALSE	NFGK(32.62)TLVTK(-32.62)	2	0.2127	32.6203	0.0198809	63.184	31.762	63.184											0.999453	32.6203	0.0198809	63.184
PF3D7_0401800	390	390	PF3D7_0401800	Plasmodium exported protein (PHISTb), unknown function	>PF3D7_0401800 organism=Plasmodium_falciparum_3D7 product=Plasmodium exported protein (PHISTb), unknown function (PfD80) location=Pf3D7_04_v3:103742-105603(-) length=560 sequence_SO=chromosome SO=protein_coding	1	K	TFSKELSKLFKKLRTKDPNMFNKNKIVFQDL	2			1	TK(1)DPNMFNK	FALSE	TK(82.96)DPNMFNK(-82.96)	2	0.13338	82.9611	0.00985899	96.143	43.653	96.143						1	82.9611	0.00985899	96.143	12119000	1	70.7038	0.0193986	78.939	16574000
PF3D7_0401800	397	397	PF3D7_0401800	Plasmodium exported protein (PHISTb), unknown function	>PF3D7_0401800 organism=Plasmodium_falciparum_3D7 product=Plasmodium exported protein (PHISTb), unknown function (PfD80) location=Pf3D7_04_v3:103742-105603(-) length=560 sequence_SO=chromosome SO=protein_coding	1	K	KLFKKLRTKDPNMFNKNKIVFQDLSKKHTWD	9			0.972719	TKDPNMFNK(0.973)NK(0.027)	FALSE	TK(-39.22)DPNMFNK(15.54)NK(-15.54)	3	-0.084899	15.5398	0.000441644	99.752	64.1	67.93						0.972719	15.5398	0.00153997	73.666	27931000	0.888954	9.03376	0.000441644	99.752	67017000
PF3D7_0402000	331	331	PF3D7_0402000	Plasmodium exported protein (PHISTa), unknown function	>PF3D7_0402000 organism=Plasmodium_falciparum_3D7 product=Plasmodium exported protein (PHISTa), unknown function location=Pf3D7_04_v3:114601-116058(-) length=428 sequence_SO=chromosome SO=protein_coding	1	K	NKKQNIKQGGKKEEVKQEGKKEEVKQEGKKE	5	......K..G...	motif9	0.999999	KEEVK(1)QEGK	FALSE	K(-59.41)EEVK(59.41)QEGK(-106.51)	2	-2.0561	59.413	0.00803313	147.91	57.758	147.91											0.999999	59.413	0.00803313	147.91	6835800
PF3D7_0402000	367	367	PF3D7_0402000	Plasmodium exported protein (PHISTa), unknown function	>PF3D7_0402000 organism=Plasmodium_falciparum_3D7 product=Plasmodium exported protein (PHISTa), unknown function location=Pf3D7_04_v3:114601-116058(-) length=428 sequence_SO=chromosome SO=protein_coding	1	K	GKKEEVKQEGKKEEVKQGGKKEEVKQGGKKE	5	......K..G...	motif9	1	KEEVK(1)QGGK	FALSE	K(-98.77)EEVK(83.02)QGGK(-83.02)	2	1.077	83.0191	7.3187e-05	188.38	47.744	188.38											1	83.0191	7.3187e-05	188.38	54118000
PF3D7_0402000	92	92	PF3D7_0402000	Plasmodium exported protein (PHISTa), unknown function	>PF3D7_0402000 organism=Plasmodium_falciparum_3D7 product=Plasmodium exported protein (PHISTa), unknown function location=Pf3D7_04_v3:114601-116058(-) length=428 sequence_SO=chromosome SO=protein_coding	1	K	GNQPCLRHTNRTDNSKMNKVKNNNQTENNDN	5			0.999226	TDNSK(0.999)MNK(0.001)	FALSE	TDNSK(31.11)MNK(-31.11)	2	0.033033	31.1118	0.00800873	127.02	51.711	127.02											0.999226	31.1118	0.00800873	127.02	14506000
PF3D7_0402000	144	144	PF3D7_0402000	Plasmodium exported protein (PHISTa), unknown function	>PF3D7_0402000 organism=Plasmodium_falciparum_3D7 product=Plasmodium exported protein (PHISTa), unknown function location=Pf3D7_04_v3:114601-116058(-) length=428 sequence_SO=chromosome SO=protein_coding	1	K	KQNDINKRGTQNTETKKSNKKLSQDYNDVNK	8			0.903241	GTQNTETK(0.903)K(0.097)	FALSE	GTQNTETK(9.7)K(-9.7)	2	-0.90825	9.70113	0.00655266	93.649	61.329	93.649											0.903241	9.70113	0.00655266	93.649	9233600
PF3D7_0402000	205	205	PF3D7_0402000	Plasmodium exported protein (PHISTa), unknown function	>PF3D7_0402000 organism=Plasmodium_falciparum_3D7 product=Plasmodium exported protein (PHISTa), unknown function location=Pf3D7_04_v3:114601-116058(-) length=428 sequence_SO=chromosome SO=protein_coding	1	K	VKTANSGTSRIKKKLKEYEQKYGRCYEERPN	2			1	LK(1)EYEQK	FALSE	LK(115.95)EYEQK(-115.95)	2	0.19327	115.952	0.0279431	135.83	56.682	127.02						1	115.952	0.0279431	135.83	131420000	1	119.224	0.0346564	127.56	36339000
PF3D7_0402000	149	149	PF3D7_0402000	Plasmodium exported protein (PHISTa), unknown function	>PF3D7_0402000 organism=Plasmodium_falciparum_3D7 product=Plasmodium exported protein (PHISTa), unknown function location=Pf3D7_04_v3:114601-116058(-) length=428 sequence_SO=chromosome SO=protein_coding	1	K	NKRGTQNTETKKSNKKLSQDYNDVNKKFTKE	1			1	K(1)LSQDYNDVNKK	FALSE	K(95.97)LSQDYNDVNK(-95.97)K(-97.58)	3	-0.03974	95.9735	0.0001101	124.12	92.522	109.16						1	95.9735	0.0001101	124.12	47214000	0.999997	58.1964	0.00172969	62.088	12882000
PF3D7_0402000	210	210	PF3D7_0402000	Plasmodium exported protein (PHISTa), unknown function	>PF3D7_0402000 organism=Plasmodium_falciparum_3D7 product=Plasmodium exported protein (PHISTa), unknown function location=Pf3D7_04_v3:114601-116058(-) length=428 sequence_SO=chromosome SO=protein_coding	1	K	SGTSRIKKKLKEYEQKYGRCYEERPNRFGSY	7			0.999999	LKEYEQK(1)YGR	FALSE	LK(-61.73)EYEQK(61.73)YGR	2	-0.40246	61.7335	0.000928459	94.767	66.059	71.221						0.999999	61.7335	0.000928459	94.767	86948000	0.998126	27.2641	0.00593787	64.82	18040000
PF3D7_0402000	203	203	PF3D7_0402000	Plasmodium exported protein (PHISTa), unknown function	>PF3D7_0402000 organism=Plasmodium_falciparum_3D7 product=Plasmodium exported protein (PHISTa), unknown function location=Pf3D7_04_v3:114601-116058(-) length=428 sequence_SO=chromosome SO=protein_coding	1	K	HAVKTANSGTSRIKKKLKEYEQKYGRCYEER	1			0.999958	K(1)LKEYEQK	FALSE	K(43.73)LK(-43.73)EYEQK(-184.46)	2	-0.10966	43.728	0.0126974	200.54	37.378	200.07						0.999958	43.728	0.0126974	200.54	30164000	0.998403	27.9598	0.0221135	148.52	6521800
PF3D7_0402000	191	191	PF3D7_0402000	Plasmodium exported protein (PHISTa), unknown function	>PF3D7_0402000 organism=Plasmodium_falciparum_3D7 product=Plasmodium exported protein (PHISTa), unknown function location=Pf3D7_04_v3:114601-116058(-) length=428 sequence_SO=chromosome SO=protein_coding	1	K	IPPRNDMEKIWNHAVKTANSGTSRIKKKLKE	7	......K.A....	motif1	1	IWNHAVK(1)TANSGTSR	FALSE	IWNHAVK(46.89)TANSGTSR	3	0.27932	46.8897	0.000620965	46.89	24.569	46.89						1	46.8897	0.000620965	46.89	14671000
PF3D7_0402000	114	114	PF3D7_0402000	Plasmodium exported protein (PHISTa), unknown function	>PF3D7_0402000 organism=Plasmodium_falciparum_3D7 product=Plasmodium exported protein (PHISTa), unknown function location=Pf3D7_04_v3:114601-116058(-) length=428 sequence_SO=chromosome SO=protein_coding	1	K	NNQTENNDNKKKLGNKEDNQGKNKNNNNKEK	4			1	LGNK(1)EDNQGK	FALSE	LGNK(65.68)EDNQGK(-65.68)	2	-0.99132	65.6777	0.00294567	99.568	35.084	99.568						1	65.6777	0.00294567	99.568	11590000
PF3D7_0402000	159	159	PF3D7_0402000	Plasmodium exported protein (PHISTa), unknown function	>PF3D7_0402000 organism=Plasmodium_falciparum_3D7 product=Plasmodium exported protein (PHISTa), unknown function location=Pf3D7_04_v3:114601-116058(-) length=428 sequence_SO=chromosome SO=protein_coding	1	K	KKSNKKLSQDYNDVNKKFTKEQMKNLVNSLD	10			0.872369	LSQDYNDVNK(0.872)K(0.128)	FALSE	LSQDYNDVNK(8.35)K(-8.35)	2	0.91391	8.34743	0.000779873	127.87	87.14	117.25						0.872369	8.34743	0.000779873	127.87	15603000
PF3D7_0402400	177	177	PF3D7_0402400	Plasmodium exported protein, unknown function	>PF3D7_0402400 organism=Plasmodium_falciparum_3D7 product=Plasmodium exported protein, unknown function (GEXP18) location=Pf3D7_04_v3:147490-148380(-) length=254 sequence_SO=chromosome SO=protein_coding	1	K	DELKSYINTNDDENQKKLWNEYINNIDYIKP	12			0.899624	SYINTNDDENQK(0.9)K(0.1)	FALSE	SYINTNDDENQK(9.52)K(-9.52)	2	0.45967	9.5243	6.19943e-05	136.7	107.4	136.7											0.899624	9.5243	6.19943e-05	136.7	13623000
PF3D7_0403800	471	471	PF3D7_0403800	alpha/beta hydrolase, putative	>PF3D7_0403800 organism=Plasmodium_falciparum_3D7 product=alpha/beta hydrolase, putative location=Pf3D7_04_v3:211650-213854(-) length=734 sequence_SO=chromosome SO=protein_coding	1	K	NSMSLNMKTLSSYTLKNKNTQGNSNHDNNNN	8			0.874106	TLSSYTLK(0.874)NK(0.126)	FALSE	TLSSYTLK(8.42)NK(-8.42)	2	0.085365	8.4156	0.0239203	64.82	39.261	64.82																0.874106	8.4156	0.0239203	64.82	5266900
PF3D7_0403800	260	260	PF3D7_0403800	alpha/beta hydrolase, putative	>PF3D7_0403800 organism=Plasmodium_falciparum_3D7 product=alpha/beta hydrolase, putative location=Pf3D7_04_v3:211650-213854(-) length=734 sequence_SO=chromosome SO=protein_coding	1	K	ENVNSVYDISNINTQKLRNMFILNNTEKLKD	16			1	ENVNSVYDISNINTQK(1)LR	FALSE	ENVNSVYDISNINTQK(43.79)LR	3	-0.28998	43.7941	0.000303857	43.794	38.89	43.794																1	43.7941	0.000303857	43.794	6981100
PF3D7_0405200	14	14	PF3D7_0405200	ag-1 blood stage membrane protein homologue	>PF3D7_0405200 organism=Plasmodium_falciparum_3D7 product=ag-1 blood stage membrane protein homologue (MAg-1) location=Pf3D7_04_v3:279072-281983(+) length=579 sequence_SO=chromosome SO=protein_coding	1	K	__MLGTKFILNIFKNKFNNLSTRFIKYVIKS	2			1	NK(1)FNNLSTR	FALSE	NK(117.01)FNNLSTR	2	-0.88077	117.014	0.0045367	117.01	18.556	117.01																1	117.014	0.0045367	117.01	48611000
PF3D7_0405600	13	13	PF3D7_0405600	TMEM33 domain-containing protein, putative	>PF3D7_0405600 organism=Plasmodium_falciparum_3D7 product=conserved Plasmodium membrane protein, unknown function location=Pf3D7_04_v3:303329-305343(+) length=315 sequence_SO=chromosome SO=protein_coding	1	K	___MSNLTAAEEKFLKHDWVNDKNWKLYLSN	3	A.....K......	motif8	0.999978	FLK(1)HDWVNDK	FALSE	FLK(46.54)HDWVNDK(-46.54)	3	0.20292	46.5431	0.00324272	56.548	36.558	56.548																0.999978	46.5431	0.00324272	56.548	2954300
PF3D7_0405900	51	51	PF3D7_0405900	apical sushi protein	>PF3D7_0405900 organism=Plasmodium_falciparum_3D7 product=apical sushi protein (ASP) location=Pf3D7_04_v3:316540-319178(-) length=731 sequence_SO=chromosome SO=protein_coding	1	K	QNIWRNTTLGELDLKKANIENAEGIIEKFND	1	......K.....A	motif2	1	K(1)ANIENAEGIIEK	FALSE	K(93.86)ANIENAEGIIEK(-93.86)	2	-0.37602	93.8593	1.1451e-05	101.2	71.266	99.941						1	93.8593	1.15E-05	101.2	19542000						1	63.3563	0.000844133	100.93	56095000
PF3D7_0405900	50	50	PF3D7_0405900	apical sushi protein	>PF3D7_0405900 organism=Plasmodium_falciparum_3D7 product=apical sushi protein (ASP) location=Pf3D7_04_v3:316540-319178(-) length=731 sequence_SO=chromosome SO=protein_coding	1	K	LQNIWRNTTLGELDLKKANIENAEGIIEKFN	10	......K.A....	motif1	0.975385	NTTLGELDLK(0.975)K(0.025)	FALSE	NTTLGELDLK(15.98)K(-15.98)	2	-0.38174	15.9798	0.00104003	119.74	65.546	112.93						0.975385	15.9798	0.00104003	119.74	115550000						0.89088	9.11914	0.00108544	100.93	125370000
PF3D7_0406200	97	97	PF3D7_0406200	sexual stage-specific protein precursor	>PF3D7_0406200 organism=Plasmodium_falciparum_3D7 product=sexual stage-specific protein precursor (Pfs16) location=Pf3D7_04_v3:329216-329689(+) length=157 sequence_SO=chromosome SO=protein_coding	1	K	QLAIEEIKSLSNMLDKKTTVNRNLIISTAVT	8			0.843359	SLSNMLDK(0.843)K(0.157)	FALSE	SLSNMLDK(7.31)K(-7.31)	2	-0.36926	7.31108	0.0032597	105.2	37.861	74.424											0.843359	7.31108	0.0032597	105.2	39706000
PF3D7_0406700	40	40	PF3D7_0406700	conserved Plasmodium protein, unknown function	>PF3D7_0406700 organism=Plasmodium_falciparum_3D7 product=conserved Plasmodium protein, unknown function location=Pf3D7_04_v3:347458-351499(+) length=847 sequence_SO=chromosome SO=protein_coding	1	K	KKAIIEYKKDLKELEKKNDILSNDKNQLQKN	8			0.998435	KDLKELEK(0.998)K(0.002)	FALSE	K(-67.09)DLK(-60.44)ELEK(28.05)K(-28.05)	2	-0.17712	28.0506	0.0222354	91.867	7.919	91.867																0.998435	28.0506	0.0222354	91.867	17611000
PF3D7_0407800	1286	1286	PF3D7_0407800	conserved Plasmodium protein, unknown function	>PF3D7_0407800 organism=Plasmodium_falciparum_3D7 product=conserved Plasmodium protein, unknown function location=Pf3D7_04_v3:384924-390806(+) length=1960 sequence_SO=chromosome SO=protein_coding	1	K	LDSLINMINDDVTQKKVQCMLKLLTRKNIFM	1	......K.Q....	motif7	1	K(1)VQCMLK	FALSE	K(99.77)VQCMLK(-99.77)	2	-0.2821	99.7659	0.0285738	110.63	61.043	104.45																1	94.2618	0.0285738	110.63	19137000
PF3D7_0407800	797	797	PF3D7_0407800	conserved Plasmodium protein, unknown function	>PF3D7_0407800 organism=Plasmodium_falciparum_3D7 product=conserved Plasmodium protein, unknown function location=Pf3D7_04_v3:384924-390806(+) length=1960 sequence_SO=chromosome SO=protein_coding	1	K	KKLKYKNTVVISNIGKKCGSSTFSNYIINDN	10	.....GK......	motif4	0.870284	NTVVISNIGK(0.87)K(0.13)	FALSE	NTVVISNIGK(8.27)K(-8.27)	2	-0.48226	8.26667	0.00096881	96.604	40.173	96.604																0.870284	8.26667	0.00096881	96.604	5570200
PF3D7_0407800	457	457	PF3D7_0407800	conserved Plasmodium protein, unknown function	>PF3D7_0407800 organism=Plasmodium_falciparum_3D7 product=conserved Plasmodium protein, unknown function location=Pf3D7_04_v3:384924-390806(+) length=1960 sequence_SO=chromosome SO=protein_coding	1	K	NNIPMQDIRNSYYENKKINDNVNNVNDDHQN	7			0.932125	NSYYENK(0.932)K(0.068)	FALSE	NSYYENK(11.38)K(-11.38)	2	0.31678	11.3777	0.00673789	121.09	54.793	121.09																0.932125	11.3777	0.00673789	121.09	15349000
PF3D7_0407800	1372	1372	PF3D7_0407800	conserved Plasmodium protein, unknown function	>PF3D7_0407800 organism=Plasmodium_falciparum_3D7 product=conserved Plasmodium protein, unknown function location=Pf3D7_04_v3:384924-390806(+) length=1960 sequence_SO=chromosome SO=protein_coding	1	K	TTNNDIFYTPKQLQKKIENFECKMLYNVLID	1			1	K(1)IENFECK	FALSE	K(90.36)IENFECK(-90.36)	2	-0.014619	90.357	0.0136735	96.948	45.881	96.948																1	90.357	0.0136735	96.948	15530000
PF3D7_0407800	838	838	PF3D7_0407800	conserved Plasmodium protein, unknown function	>PF3D7_0407800 organism=Plasmodium_falciparum_3D7 product=conserved Plasmodium protein, unknown function location=Pf3D7_04_v3:384924-390806(+) length=1960 sequence_SO=chromosome SO=protein_coding	1	K	TEENCIYAYITRNQNKINYLYLDYEKITSEQ	4			0.999997	NQNK(1)INYLYLDYEK	FALSE	NQNK(54.9)INYLYLDYEK(-54.9)	3	0.29123	54.8998	0.000310144	62.035	41.652	55.724																0.999997	54.8998	0.000489464	55.724	6989700
PF3D7_0407800	563	563	PF3D7_0407800	conserved Plasmodium protein, unknown function	>PF3D7_0407800 organism=Plasmodium_falciparum_3D7 product=conserved Plasmodium protein, unknown function location=Pf3D7_04_v3:384924-390806(+) length=1960 sequence_SO=chromosome SO=protein_coding	1	K	FDQRNSNNSNLTNDRKDIFYNRMNLMYGDNH	1			1	K(1)DIFYNR	FALSE	K(99)DIFYNR	2	0.71593	98.9966	0.0329201	98.997	19.528	98.997																1	98.9966	0.0329201	98.997	3315900
PF3D7_0407800	692	692	PF3D7_0407800	conserved Plasmodium protein, unknown function	>PF3D7_0407800 organism=Plasmodium_falciparum_3D7 product=conserved Plasmodium protein, unknown function location=Pf3D7_04_v3:384924-390806(+) length=1960 sequence_SO=chromosome SO=protein_coding	1	K	HVHDKNRNSNISNLYKRNTKICNLYNDDLLD	9			1	NSNISNLYK(1)R	FALSE	NSNISNLYK(70.94)R	2	0.089865	70.9415	0.0100548	70.942	31.903	70.942																1	70.9415	0.0100548	70.942	2953200
PF3D7_0407800	937	937	PF3D7_0407800	conserved Plasmodium protein, unknown function	>PF3D7_0407800 organism=Plasmodium_falciparum_3D7 product=conserved Plasmodium protein, unknown function location=Pf3D7_04_v3:384924-390806(+) length=1960 sequence_SO=chromosome SO=protein_coding	1	K	QSGKNEGDQFDLKNMKNVLSPKDNHKSEDNH	3			0.999843	NMK(1)NVLSPK	FALSE	NMK(38.05)NVLSPK(-38.05)	2	0.1823	38.0497	0.0301909	68.847	41.023	68.847																0.999843	38.0497	0.0301909	68.847	8825800
PF3D7_0407800	1101	1101	PF3D7_0407800	conserved Plasmodium protein, unknown function	>PF3D7_0407800 organism=Plasmodium_falciparum_3D7 product=conserved Plasmodium protein, unknown function location=Pf3D7_04_v3:384924-390806(+) length=1960 sequence_SO=chromosome SO=protein_coding	1	K	NFSLPYFIFVLRDVNKEEFSKMNLQNDSLFN	4			0.999999	DVNK(1)EEFSK	FALSE	DVNK(59.55)EEFSK(-59.55)	2	0.17341	59.5466	0.0119564	91.867	44.68	91.867																0.999999	59.5466	0.0119564	91.867	5151100
PF3D7_0407800	656	656	PF3D7_0407800	conserved Plasmodium protein, unknown function	>PF3D7_0407800 organism=Plasmodium_falciparum_3D7 product=conserved Plasmodium protein, unknown function location=Pf3D7_04_v3:384924-390806(+) length=1960 sequence_SO=chromosome SO=protein_coding	1	K	YKRETELYDKILYDYKLNQHKYPSYFQKNIN	6			0.970659	ILYDYK(0.971)LNQHK(0.029)	FALSE	ILYDYK(15.2)LNQHK(-15.2)	3	1.4826	15.1959	0.00168924	57.532	36.754	57.532																0.970659	15.1959	0.00168924	57.532	5531800
PF3D7_0407800	117	117	PF3D7_0407800	conserved Plasmodium protein, unknown function	>PF3D7_0407800 organism=Plasmodium_falciparum_3D7 product=conserved Plasmodium protein, unknown function location=Pf3D7_04_v3:384924-390806(+) length=1960 sequence_SO=chromosome SO=protein_coding	1	K	SSVFRPVDRVQTIQEKKSSYGNNMFDYNYLR	7			0.857931	VQTIQEK(0.858)K(0.142)	FALSE	VQTIQEK(7.81)K(-7.81)	2	0.12337	7.80954	0.0280476	72.23	22.812	72.23																0.857931	7.80954	0.0280476	72.23	4446400
PF3D7_0413900	479	479	PF3D7_0413900	ubiquitin carboxyl-terminal hydrolase 13, putative	>PF3D7_0413900 organism=Plasmodium_falciparum_3D7 product=ubiquitin carboxyl-terminal hydrolase 13, putative (USP13) location=Pf3D7_04_v3:623168-626226(-) length=853 sequence_SO=chromosome SO=protein_coding	1	K	NNIFDRILKVNNNKRKLNEINNETNEKLNPN	1			1	K(1)LNEINNETNEK	FALSE	K(97.85)LNEINNETNEK(-97.85)	2	-0.020347	97.8525	5.149e-05	131.06	65.34	131.06																1	98.2052	5.149e-05	128.54	24048000
PF3D7_0413900	850	850	PF3D7_0413900	ubiquitin carboxyl-terminal hydrolase 13, putative	>PF3D7_0413900 organism=Plasmodium_falciparum_3D7 product=ubiquitin carboxyl-terminal hydrolase 13, putative (USP13) location=Pf3D7_04_v3:623168-626226(-) length=853 sequence_SO=chromosome SO=protein_coding	1	K	CEGNLGKDSAYIHLYKRLS____________	9			1	DSAYIHLYK(1)R	FALSE	DSAYIHLYK(42.34)R	3	0.16144	42.3359	0.00151341	100.25	82.078	42.336						1	42.3359	0.0155272	42.336							1	89.0795	0.00151341	100.25	53261000
PF3D7_0413900	589	589	PF3D7_0413900	ubiquitin carboxyl-terminal hydrolase 13, putative	>PF3D7_0413900 organism=Plasmodium_falciparum_3D7 product=ubiquitin carboxyl-terminal hydrolase 13, putative (USP13) location=Pf3D7_04_v3:623168-626226(-) length=853 sequence_SO=chromosome SO=protein_coding	1	K	NNYIKKDNIDEYYCQKEKKKIHAQKYMKFKT	11			0.999659	KDNIDEYYCQK(1)EK	FALSE	K(-141.35)DNIDEYYCQK(34.67)EK(-34.67)	3	-0.80631	34.6702	1.95266e-20	211.26	174.32	151.7																0.999659	34.6702	1.95266e-20	211.26	35118000
PF3D7_0413900	67	67	PF3D7_0413900	ubiquitin carboxyl-terminal hydrolase 13, putative	>PF3D7_0413900 organism=Plasmodium_falciparum_3D7 product=ubiquitin carboxyl-terminal hydrolase 13, putative (USP13) location=Pf3D7_04_v3:623168-626226(-) length=853 sequence_SO=chromosome SO=protein_coding	1	K	SFSLKFLKCNYNRLSKLSSEGKNHRFYLNIK	3			1	LSK(1)LSSEGK	FALSE	LSK(112.07)LSSEGK(-112.07)	2	-0.3298	112.075	0.00217417	135.43	70.182	135.43						1	112.075	0.00217417	135.43	10248000						1	87.9589	0.00307073	123.86	88767000
PF3D7_0413900	591	591	PF3D7_0413900	ubiquitin carboxyl-terminal hydrolase 13, putative	>PF3D7_0413900 organism=Plasmodium_falciparum_3D7 product=ubiquitin carboxyl-terminal hydrolase 13, putative (USP13) location=Pf3D7_04_v3:623168-626226(-) length=853 sequence_SO=chromosome SO=protein_coding	1	K	YIKKDNIDEYYCQKEKKKIHAQKYMKFKTFP	12			0.791466	DNIDEYYCQK(0.209)EK(0.791)	FALSE	DNIDEYYCQK(-5.79)EK(5.79)	2	-0.31119	5.79256	6.05268e-09	168.02	131.72	168.02																0.791466	5.79256	6.05268e-09	168.02	7219500
PF3D7_0413900	693	693	PF3D7_0413900	ubiquitin carboxyl-terminal hydrolase 13, putative	>PF3D7_0413900 organism=Plasmodium_falciparum_3D7 product=ubiquitin carboxyl-terminal hydrolase 13, putative (USP13) location=Pf3D7_04_v3:623168-626226(-) length=853 sequence_SO=chromosome SO=protein_coding	1	K	KDVLDSLLDFGFEKDKAIEAIKKVKIKNVNN	2	......KA.....	motif3	1	DK(1)AIEAIKK	FALSE	DK(80.46)AIEAIK(-80.46)K(-85.51)	2	-0.10119	80.4554	0.00718087	90.827	34.395	90.827																1	80.4554	0.00718087	90.827	26540000
PF3D7_0414600	125	125	PF3D7_0414600	acylated pleckstrin-homology domain-containing protein, putative	>PF3D7_0414600 organism=Plasmodium_falciparum_3D7 product=conserved protein, unknown function location=Pf3D7_04_v3:658620-659538(-) length=235 sequence_SO=chromosome SO=protein_coding	1	K	DDSDENISAKDIKDEKIQQYRKTLTKIVKIK	6	......K.Q....	motif7	0.979452	DIK(0.021)DEK(0.979)IQQYR	FALSE	DIK(-16.78)DEK(16.78)IQQYR	3	0.92278	16.7822	0.00487132	56.936	28.033	56.936																0.979452	16.7822	0.00487132	56.936	8802800
PF3D7_0414900	26	26	PF3D7_0414900	armadillo-domain containing rhoptry protein	>PF3D7_0414900 organism=Plasmodium_falciparum_3D7 product=armadillo-domain containing rhoptry protein (ARO) location=Pf3D7_04_v3:665973-668147(+) length=275 sequence_SO=chromosome SO=protein_coding	1	K	LLYKNKLQEFGIEGSKTIRKLLSFTSNDILR	10			1	LQEFGIEGSK(1)TIR	FALSE	LQEFGIEGSK(43.03)TIR	2	0.48315	43.0301	6.30855e-05	80.96	57.283	43.03																1	65.0429	6.30855e-05	80.96	40955000
PF3D7_0414900	30	30	PF3D7_0414900	armadillo-domain containing rhoptry protein	>PF3D7_0414900 organism=Plasmodium_falciparum_3D7 product=armadillo-domain containing rhoptry protein (ARO) location=Pf3D7_04_v3:665973-668147(+) length=275 sequence_SO=chromosome SO=protein_coding	1	K	NKLQEFGIEGSKTIRKLLSFTSNDILRFDKA	1			1	K(1)LLSFTSNDILR	FALSE	K(58.1)LLSFTSNDILR	3	0.92243	58.0983	6.67792e-05	96.604	78.468	58.098																1	96.6043	6.67792e-05	96.604	5373400
PF3D7_0414900	184	184	PF3D7_0414900	armadillo-domain containing rhoptry protein	>PF3D7_0414900 organism=Plasmodium_falciparum_3D7 product=armadillo-domain containing rhoptry protein (ARO) location=Pf3D7_04_v3:665973-668147(+) length=275 sequence_SO=chromosome SO=protein_coding	1	K	AACAQTCRNIFVLDKKYKKEFLKLGGITQLV	8			0.920456	NIFVLDK(0.08)K(0.92)	FALSE	NIFVLDK(-10.63)K(10.63)	2	-0.21457	10.634	0.0306704	69.598	30.636	68.224																0.920456	10.634	0.0306704	69.598	8433500
PF3D7_0414900	249	249	PF3D7_0414900	armadillo-domain containing rhoptry protein	>PF3D7_0414900 organism=Plasmodium_falciparum_3D7 product=armadillo-domain containing rhoptry protein (ARO) location=Pf3D7_04_v3:665973-668147(+) length=275 sequence_SO=chromosome SO=protein_coding	1	K	EIPEFLEAVKNSNSIKNLKTLQQCPEQDLAE	6			0.99688	NSNSIK(0.997)NLK(0.003)	FALSE	NSNSIK(25.05)NLK(-25.05)	2	0.28788	25.0452	0.0129875	89.886	31.187	89.886																0.99688	25.0452	0.0129875	89.886	10381000
PF3D7_0414900	16	16	PF3D7_0414900	armadillo-domain containing rhoptry protein	>PF3D7_0414900 organism=Plasmodium_falciparum_3D7 product=armadillo-domain containing rhoptry protein (ARO) location=Pf3D7_04_v3:665973-668147(+) length=275 sequence_SO=chromosome SO=protein_coding	1	K	MGNNCCAGRDLLYKNKLQEFGIEGSKTIRKL	2	......K.Q....	motif7	1	NK(1)LQEFGIEGSK	FALSE	NK(126.4)LQEFGIEGSK(-126.4)	2	0.22088	126.397	0.000380666	131.69	45.623	131.69																1	126.397	0.000380666	131.69	27002000
PF3D7_0414900	102	102	PF3D7_0414900	armadillo-domain containing rhoptry protein	>PF3D7_0414900 organism=Plasmodium_falciparum_3D7 product=armadillo-domain containing rhoptry protein (ARO) location=Pf3D7_04_v3:665973-668147(+) length=275 sequence_SO=chromosome SO=protein_coding	1	K	TQLAILASKENEPHYKDAIREANGIAVFINL	7	......K.A....	motif1	1	ENEPHYK(1)DAIR	FALSE	ENEPHYK(42.08)DAIR	3	0.3138	42.0835	0.00340406	50.149	41.404	42.083																1	42.0835	0.00340406	50.149	23241000
PF3D7_0414900	168	168	PF3D7_0414900	armadillo-domain containing rhoptry protein	>PF3D7_0414900 organism=Plasmodium_falciparum_3D7 product=armadillo-domain containing rhoptry protein (ARO) location=Pf3D7_04_v3:665973-668147(+) length=275 sequence_SO=chromosome SO=protein_coding	1	K	LPYLISGMKSNIDGMKAACAQTCRNIFVLDK	7	......K.A....	motif1	1	SNIDGMK(1)AACAQTCR	FALSE	SNIDGMK(41.54)AACAQTCR	3	0.20625	41.5417	0.00149506	41.542	36.403	41.542																1	41.5417	0.00149506	41.542	9505600
PF3D7_0414900	252	252	PF3D7_0414900	armadillo-domain containing rhoptry protein	>PF3D7_0414900 organism=Plasmodium_falciparum_3D7 product=armadillo-domain containing rhoptry protein (ARO) location=Pf3D7_04_v3:665973-668147(+) length=275 sequence_SO=chromosome SO=protein_coding	1	K	EFLEAVKNSNSIKNLKTLQQCPEQDLAEASN	3			1	NLK(1)TLQQCPEQDLAEASNVLLLR	FALSE	NLK(95.2)TLQQCPEQDLAEASNVLLLR	3	0.72516	95.1952	1.00754e-20	95.195	89.526	95.195																1	95.1952	1.00754e-20	95.195	12061000
PF3D7_0414900	186	186	PF3D7_0414900	armadillo-domain containing rhoptry protein	>PF3D7_0414900 organism=Plasmodium_falciparum_3D7 product=armadillo-domain containing rhoptry protein (ARO) location=Pf3D7_04_v3:665973-668147(+) length=275 sequence_SO=chromosome SO=protein_coding	1	K	CAQTCRNIFVLDKKYKKEFLKLGGITQLVNL	2			0.990861	YK(0.991)K(0.009)EFLK	FALSE	YK(20.35)K(-20.35)EFLK(-68.15)	3	0.014383	20.3512	0.0305256	72.138	16.697	72.138																0.990861	20.3512	0.0305256	72.138	9277400
PF3D7_0416800	67	67	PF3D7_0416800	small GTP-binding protein sar1	>PF3D7_0416800 organism=Plasmodium_falciparum_3D7 product=small GTP-binding protein sar1 (SAR1) location=Pf3D7_04_v3:729962-731223(+) length=192 sequence_SO=chromosome SO=protein_coding	1	K	LHPHSEELVVGKIRFKTFDLGGHETARRIWR	2			1	FK(1)TFDLGGHETAR	FALSE	FK(41.62)TFDLGGHETAR	3	0.3719	41.6209	0.000333876	64.798	52.167	41.621											1	41.6209	0.0012235	47.037	2297100	1	64.7982	0.000333876	64.798	17951000
PF3D7_0416800	19	19	PF3D7_0416800	small GTP-binding protein sar1	>PF3D7_0416800 organism=Plasmodium_falciparum_3D7 product=small GTP-binding protein sar1 (SAR1) location=Pf3D7_04_v3:729962-731223(+) length=192 sequence_SO=chromosome SO=protein_coding	1	K	INWFRDILAHLGLSQKSARILFLGLDNAGKT	11	......K.A....	motif1	1	DILAHLGLSQK(1)SAR	FALSE	DILAHLGLSQK(48.53)SAR	3	0.30394	48.5269	0.00119941	48.527	37.482	48.527																1	48.5269	0.00119941	48.527	1497700
PF3D7_0417400	2202	2202	PF3D7_0417400	conserved Plasmodium protein, unknown function	>PF3D7_0417400 organism=Plasmodium_falciparum_3D7 product=conserved Plasmodium protein, unknown function location=Pf3D7_04_v3:756294-776603(+) length=6769 sequence_SO=chromosome SO=protein_coding	2	K	QKKCKLLFHIIRNIQKHIISKKKKKESLLLI	4			1	NIQK(1)HIISK(1)	TRUE	NIQK(57.71)HIISK(57.71)	2	2.627	57.7081	0.0110181	57.708	20.095	57.708																1	57.7081	0.0110181	57.708
PF3D7_0417400	2207	2207	PF3D7_0417400	conserved Plasmodium protein, unknown function	>PF3D7_0417400 organism=Plasmodium_falciparum_3D7 product=conserved Plasmodium protein, unknown function location=Pf3D7_04_v3:756294-776603(+) length=6769 sequence_SO=chromosome SO=protein_coding	2	K	LLFHIIRNIQKHIISKKKKKESLLLINNESI	9			1	NIQK(1)HIISK(1)	TRUE	NIQK(57.71)HIISK(57.71)	2	2.627	57.7081	0.0110181	57.708	20.095	57.708																1	57.7081	0.0110181	57.708
PF3D7_0417400	4935	4935	PF3D7_0417400	conserved Plasmodium protein, unknown function	>PF3D7_0417400 organism=Plasmodium_falciparum_3D7 product=conserved Plasmodium protein, unknown function location=Pf3D7_04_v3:756294-776603(+) length=6769 sequence_SO=chromosome SO=protein_coding	1	K	LKNYETLEKIHASKMKKKEQQREKDKEKNIF	7	..A...K......	motif11	0.878099	IHASK(0.003)MK(0.878)K(0.119)	FALSE	IHASK(-24.56)MK(8.69)K(-8.69)	2	-2.3658	8.6862	0.0349686	45.081	14.517	45.081																0.878099	8.6862	0.0349686	45.081
PF3D7_0417600	174	174	PF3D7_0417600	conserved Plasmodium protein, unknown function	>PF3D7_0417600 organism=Plasmodium_falciparum_3D7 product=conserved Plasmodium protein, unknown function location=Pf3D7_04_v3:780250-783246(-) length=807 sequence_SO=chromosome SO=protein_coding	1	K	KKEIKFLKESIRKNEKLLDSNKKKPNPVSLE	4			0.792566	K(0.207)NEK(0.793)LLDSNK	FALSE	K(-5.83)NEK(5.83)LLDSNK(-33.65)	2	1.2671	5.83202	0.0322027	42.976	9.703	42.976																0.792566	5.83202	0.0322027	42.976	9672100
PF3D7_0419600	131	131	PF3D7_0419600	ran-specific GTPase-activating protein 1, putative	>PF3D7_0419600 organism=Plasmodium_falciparum_3D7 product=ran binding protein 1, putative location=Pf3D7_04_v3:870737-871873(+) length=280 sequence_SO=chromosome SO=protein_coding	1	K	VKDFAEEPKIEQFALKFNTADAAKLFKQKFD	7	......K.....A	motif2	0.998257	IEQFALK(0.998)FNTADAAK(0.002)	FALSE	IEQFALK(27.58)FNTADAAK(-27.58)	3	-0.040364	27.5783	0.00069186	45.54	45.54	45.54																0.998257	27.5783	0.00069186	45.54	9122500
PF3D7_0420300	3301	3301	PF3D7_0420300	AP2 domain transcription factor, putative	>PF3D7_0420300 organism=Plasmodium_falciparum_3D7 product=transcription factor with AP2 domain(s) (ApiAP2) location=Pf3D7_04_v3:917990-928411(+) length=3473 sequence_SO=chromosome SO=protein_coding	1	K	YIINNSIKTKGFSVKKLGLAQAKIEAESFRN	1	......K.....A	motif2	1	K(1)LGLAQAK	FALSE	K(67.9)LGLAQAK(-67.9)	2	0.53374	67.9026	0.0323602	67.903	13.846	67.903																1	67.9026	0.0323602	67.903	3042600
PF3D7_0420300	1687	1687	PF3D7_0420300	AP2 domain transcription factor, putative	>PF3D7_0420300 organism=Plasmodium_falciparum_3D7 product=transcription factor with AP2 domain(s) (ApiAP2) location=Pf3D7_04_v3:917990-928411(+) length=3473 sequence_SO=chromosome SO=protein_coding	1	K	LMSKNLKYSNLPNYEKVRANYREAHLLNEKE	9	......K..A...	motif6	1	YSNLPNYEK(1)VR	FALSE	YSNLPNYEK(42.63)VR	3	-0.37774	42.629	0.00577926	42.629	32.624	42.629																1	42.629	0.00577926	42.629	3260100
PF3D7_0422300;PF3D7_0903700		401	PF3D7_0422300	alpha tubulin 2	>PF3D7_0422300 organism=Plasmodium_falciparum_3D7 product=alpha tubulin 2 location=Pf3D7_04_v3:1022487-1024166(+) length=450 sequence_SO=chromosome SO=protein_coding;>PF3D7_0903700 organism=Plasmodium_falciparum_3D7 product=alpha tubulin 1 location=Pf3D7_	1	K	EVFSRMDQKFDLMYAKRAFVHWYVGEGMEEG	7	......K.A....	motif1	1	FDLMYAK(1)R	FALSE	FDLMYAK(71.5)R	2	-0.45515	71.5012	0.00924599	109.01	83.205	71.501																1	109.012	0.00924599	109.01	12090000
PF3D7_0422300;PF3D7_0903700		336	PF3D7_0422300	alpha tubulin 2	>PF3D7_0422300 organism=Plasmodium_falciparum_3D7 product=alpha tubulin 2 location=Pf3D7_04_v3:1022487-1024166(+) length=450 sequence_SO=chromosome SO=protein_coding;>PF3D7_0903700 organism=Plasmodium_falciparum_3D7 product=alpha tubulin 1 location=Pf3D7_	1	K	GDVVPKDVNAAVATIKTKRSIQFVDWCPTGF;GDVVPKDVNAAVATIKTKRTIQFVDWCPTGF	10	A.....K......	motif8	0.876138	DVNAAVATIK(0.876)TK(0.124)	FALSE	DVNAAVATIK(8.5)TK(-8.5)	2	-0.5133	8.49634	0.00038846	129.37	92.783	129.37																0.876138	8.49634	0.00038846	129.37	56514000
PF3D7_0422300;PF3D7_0903700		326	PF3D7_0422300	alpha tubulin 2	>PF3D7_0422300 organism=Plasmodium_falciparum_3D7 product=alpha tubulin 2 location=Pf3D7_04_v3:1022487-1024166(+) length=450 sequence_SO=chromosome SO=protein_coding;>PF3D7_0903700 organism=Plasmodium_falciparum_3D7 product=alpha tubulin 1 location=Pf3D7_	1	K	KYMACCLMYRGDVVPKDVNAAVATIKTKRSI;KYMACCLMYRGDVVPKDVNAAVATIKTKRTI	6			0.999998	GDVVPK(1)DVNAAVATIK	FALSE	GDVVPK(57.11)DVNAAVATIK(-57.11)	3	-0.47789	57.1054	5.71131e-06	69.485	36.338	68.481																0.999998	57.1054	5.71131e-06	68.481	10650000
PF3D7_0422300;PF3D7_0903700		394	PF3D7_0422300	alpha tubulin 2	>PF3D7_0422300 organism=Plasmodium_falciparum_3D7 product=alpha tubulin 2 location=Pf3D7_04_v3:1022487-1024166(+) length=450 sequence_SO=chromosome SO=protein_coding;>PF3D7_0903700 organism=Plasmodium_falciparum_3D7 product=alpha tubulin 1 location=Pf3D7_	1	K	SNSTAIAEVFSRMDQKFDLMYAKRAFVHWYV	4	......K.....A	motif2	0.999982	MDQK(1)FDLMYAK	FALSE	MDQK(47.42)FDLMYAK(-47.42)	2	-1.1081	47.4244	0.0192639	51.286	38.009	51.286																0.999982	47.4244	0.0192639	51.286	8398800
PF3D7_0422400	121	121	PF3D7_0422400	40S ribosomal protein S19	>PF3D7_0422400 organism=Plasmodium_falciparum_3D7 product=40S ribosomal protein S19 (RPS19) location=Pf3D7_04_v3:1026648-1027399(+) length=170 sequence_SO=chromosome SO=protein_coding	1	K	QRRGVAPNHTSLASGKILRSILQQLENLGYV	14	.....GK......	motif4	1	RGVAPNHTSLASGK(1)ILR	FALSE	RGVAPNHTSLASGK(55.01)ILR	4	-0.087701	55.0106	3.68626e-07	105.39	86.814	55.011																1	71.98	3.68626e-07	105.39	24135000
PF3D7_0422700	366	366	PF3D7_0422700	eukaryotic initiation factor 4A-III, putative	>PF3D7_0422700 organism=Plasmodium_falciparum_3D7 product=eukaryotic initiation factor, putative location=Pf3D7_04_v3:1040470-1041642(+) length=390 sequence_SO=chromosome SO=protein_coding	1	K	GRKGVAINFVKNDDIKILRDIEQYYSTQIDE	5			1	NDDIK(1)ILR	FALSE	NDDIK(74.92)ILR	2	-1.1263	74.9199	0.025456	77.732	9.5085	74.92																1	67.8972	0.025456	67.897
PF3D7_0422700;sp|P38919|IF4A3_HUMAN		353	PF3D7_0422700	eukaryotic initiation factor 4A-III, putative	>PF3D7_0422700 organism=Plasmodium_falciparum_3D7 product=eukaryotic initiation factor, putative location=Pf3D7_04_v3:1040470-1041642(+) length=390 sequence_SO=chromosome SO=protein_coding;>sp|P38919|IF4A3_HUMAN Eukaryotic initiation factor 4A-III OS=Homo	1	K	ESYIHRIGRSGRFGRKGVAINFVKNDDIKIL	1	......K..A...	motif6	1	K(1)GVAINFVK	FALSE	K(79.78)GVAINFVK(-79.78)	2	1.0759	79.7788	0.00760999	90.15	23.852	90.15																1	79.7788	0.00760999	90.15	15540000
PF3D7_0422700;sp|P38919|IF4A3_HUMAN;tr|J3KT12|J3KT12_HUMAN;sp|P60842-2|IF4A1_HUMAN;sp|P60842|IF4A1_HUMAN;tr|J3QLN6|J3QLN6_HUMAN;tr|J3KS25|J3KS25_HUMAN;tr|J3QR64|J3QR64_HUMAN;tr|J3KTB5|J3KTB5_HUMAN;tr|J3QL43|J3QL43_HUMAN;tr|J3KSN7|J3KSN7_HUMAN;tr|J3QKZ9|J3		39	PF3D7_0422700	eukaryotic initiation factor 4A-III, putative	>PF3D7_0422700 organism=Plasmodium_falciparum_3D7 product=eukaryotic initiation factor, putative location=Pf3D7_04_v3:1040470-1041642(+) length=390 sequence_SO=chromosome SO=protein_coding;>sp|P38919|IF4A3_HUMAN Eukaryotic initiation factor 4A-III OS=Homo	1	K	IDEGLLRGIYAYGFEKPSAIQQRGIKPILNG;LSESLLRGIYAYGFEKPSAIQQRAILPCIKG	9	......K..A...	motif6	1	GIYAYGFEK(1)PSAIQQR	FALSE	GIYAYGFEK(59.68)PSAIQQR	3	0.029472	59.6797	9.37016e-06	76.759	76.759	59.68	1	59.6797	5.08E-05	66.387	26364000											1	76.7593	9.37016e-06	76.759	9996800
PF3D7_0423500	355	355	PF3D7_0423500	glideosome associated protein with multiple membrane spans 2	>PF3D7_0423500 organism=Plasmodium_falciparum_3D7 product=glideosome associated protein with multiple membrane spans 2 (GAPM2) location=Pf3D7_04_v3:1058997-1060551(+) length=372 sequence_SO=chromosome SO=protein_coding	1	K	IPTTYDYTQIEGQLKKNVEMGVTENNYIKTA	1			1	K(1)NVEMGVTENNYIK	FALSE	K(105.98)NVEMGVTENNYIK(-105.98)	3	0.46433	105.985	1.8782e-07	127.79	106.02	112.08																1	105.985	1.8782e-07	127.79	46183000
PF3D7_0423500	368	368	PF3D7_0423500	glideosome associated protein with multiple membrane spans 2	>PF3D7_0423500 organism=Plasmodium_falciparum_3D7 product=glideosome associated protein with multiple membrane spans 2 (GAPM2) location=Pf3D7_04_v3:1058997-1060551(+) length=372 sequence_SO=chromosome SO=protein_coding	1	K	LKKNVEMGVTENNYIKTAQY___________	13			1	NVEMGVTENNYIK(1)TAQY	FALSE	NVEMGVTENNYIK(87.65)TAQY	2	0.4237	87.6473	2.82835e-07	107.82	90.684	87.647																1	87.6473	2.82835e-07	107.82	3911600
PF3D7_0423700	46	46	PF3D7_0423700	early transcribed membrane protein 4	>PF3D7_0423700 organism=Plasmodium_falciparum_3D7 product=early transcribed membrane protein 4 (ETRAMP4) location=Pf3D7_04_v3:1071435-1071845(-) length=136 sequence_SO=chromosome SO=protein_coding	1	K	VNVDSIVMSKIDEMQKKKQQQKIIMISTVVT	6			0.996234	IDEMQK(0.996)K(0.004)	FALSE	IDEMQK(24.22)K(-24.22)	2	0.97837	24.2247	0.0261178	121.29	13.863	121.29											0.996234	24.2247	0.0261178	121.29	28045000
PF3D7_0424600	225	225	PF3D7_0424600	Plasmodium exported protein (PHISTb), unknown function	>PF3D7_0424600 organism=Plasmodium_falciparum_3D7 product=Plasmodium exported protein (PHISTb), unknown function location=Pf3D7_04_v3:1113345-1114486(-) length=309 sequence_SO=chromosome SO=protein_coding	1	K	YAATKRSMLRYYDDLKRKRIIRPKTYTNKLN	6			1	YYDDLK(1)R	FALSE	YYDDLK(128.48)R	2	0.47047	128.484	0.0149013	143.02	65.645	128.48						1	128.484	0.0149013	143.02	60244000	1	122.79	0.0156306	138.85	53713000	1	90.7062	0.0307262	101.69	16176000
PF3D7_0424600	238	238	PF3D7_0424600	Plasmodium exported protein (PHISTb), unknown function	>PF3D7_0424600 organism=Plasmodium_falciparum_3D7 product=Plasmodium exported protein (PHISTb), unknown function location=Pf3D7_04_v3:1113345-1114486(-) length=309 sequence_SO=chromosome SO=protein_coding	1	K	DLKRKRIIRPKTYTNKLNSCNQIMESSEKKI	5			1	TYTNK(1)LNSCNQIMESSEK	FALSE	TYTNK(85.99)LNSCNQIMESSEK(-85.99)	3	-1.4606	85.9851	2.26985e-10	103.88	95.024	103.88						0.999978	46.6424	2.25E-05	55.437	21252000	1	85.9851	2.26985e-10	103.88	27549000	0.999995	53.3642	1.8658e-05	57.616	12478000
PF3D7_0424600	188	188	PF3D7_0424600	Plasmodium exported protein (PHISTb), unknown function	>PF3D7_0424600 organism=Plasmodium_falciparum_3D7 product=Plasmodium exported protein (PHISTb), unknown function location=Pf3D7_04_v3:1113345-1114486(-) length=309 sequence_SO=chromosome SO=protein_coding	1	K	ADFVLDKYIDNLGYCKGDTIKAMEIIWEATM	9	......K.....A	motif2	0.999746	YIDNLGYCK(1)GDTIK	FALSE	YIDNLGYCK(35.95)GDTIK(-35.95)	3	-0.30964	35.9468	5.04089e-05	80.746	54.629	72.891											0.999746	35.9468	5.04089e-05	80.746	39253000
PF3D7_0424600	268	268	PF3D7_0424600	Plasmodium exported protein (PHISTb), unknown function	>PF3D7_0424600 organism=Plasmodium_falciparum_3D7 product=Plasmodium exported protein (PHISTb), unknown function location=Pf3D7_04_v3:1113345-1114486(-) length=309 sequence_SO=chromosome SO=protein_coding	1	K	IESHLSEMFNKWFKQKSLFLDDFNRFITACR	2			1	QK(1)SLFLDDFNR	FALSE	QK(54.27)SLFLDDFNR	3	0.30985	54.27	0.00219635	54.27	44.721	54.27											1	54.27	0.00219635	54.27	12218000
PF3D7_0424600	233	233	PF3D7_0424600	Plasmodium exported protein (PHISTb), unknown function	>PF3D7_0424600 organism=Plasmodium_falciparum_3D7 product=Plasmodium exported protein (PHISTb), unknown function location=Pf3D7_04_v3:1113345-1114486(-) length=309 sequence_SO=chromosome SO=protein_coding	1	K	LRYYDDLKRKRIIRPKTYTNKLNSCNQIMES	5			1	IIRPK(1)TYTNK	FALSE	IIRPK(92.77)TYTNK(-92.77)	2	0.011475	92.7661	0.00111126	128.03	64.959	128.03						0.999943	42.4238	0.00232662	71.221	19693000	1	92.7661	0.00111126	128.03	203300000	0.99374	22.0069	0.00296618	58.592	27800000
PF3D7_0500800	549	549	PF3D7_0500800	mature parasite-infected erythrocyte surface antigen	>PF3D7_0500800 organism=Plasmodium_falciparum_3D7 product=mature parasite-infected erythrocyte surface antigen (MESA) location=Pf3D7_05_v3:43327-47761(-) length=1434 sequence_SO=chromosome SO=protein_coding	1	K	KEKNDGKKDKVIGSEKTQKEIKEKVEKRVKK	6	......K.Q....	motif7	0.998719	VIGSEK(0.999)TQK(0.001)	FALSE	VIGSEK(28.92)TQK(-28.92)	2	0.067924	28.9195	0.00205269	128.36	55.101	128.36											0.998719	28.9195	0.00205269	128.36	20905000
PF3D7_0500800	226	226	PF3D7_0500800	mature parasite-infected erythrocyte surface antigen	>PF3D7_0500800 organism=Plasmodium_falciparum_3D7 product=mature parasite-infected erythrocyte surface antigen (MESA) location=Pf3D7_05_v3:43327-47761(-) length=1434 sequence_SO=chromosome SO=protein_coding	1	K	DESKETDESKETGESKETGESKETGESKETG	6	......K..G...	motif9	0.999936	ETGESK(1)ETGESK	FALSE	ETGESK(41.9)ETGESK(-41.9)	2	-0.30989	41.9035	7.46556e-17	140.89	108.38	64.224											0.999936	41.9035	7.46556e-17	140.89	18783000
PF3D7_0500800	232	232	PF3D7_0500800	mature parasite-infected erythrocyte surface antigen	>PF3D7_0500800 organism=Plasmodium_falciparum_3D7 product=mature parasite-infected erythrocyte surface antigen (MESA) location=Pf3D7_05_v3:43327-47761(-) length=1434 sequence_SO=chromosome SO=protein_coding	1	K	DESKETGESKETGESKETGESKETGESKETG	12	......K..G...	motif9	0.99972	ETGESKETGESK(1)ETGESK	FALSE	ETGESK(-35.54)ETGESK(35.54)ETGESK(-59.91)	3	0.261	35.5443	2.09834e-20	164.97	127.27	164.97											0.99972	35.5443	2.09834e-20	164.97	69377000
PF3D7_0500800	334	334	PF3D7_0500800	mature parasite-infected erythrocyte surface antigen	>PF3D7_0500800 organism=Plasmodium_falciparum_3D7 product=mature parasite-infected erythrocyte surface antigen (MESA) location=Pf3D7_05_v3:43327-47761(-) length=1434 sequence_SO=chromosome SO=protein_coding	1	K	SEFRETENVKITEESKDREGNKVSGPYENSE	6			1	ITEESK(1)DR	FALSE	ITEESK(99.14)DR	2	0.70974	99.1386	0.021361	99.139	39.789	99.139											1	99.1386	0.021361	99.139	13963000
PF3D7_0500800	190	190	PF3D7_0500800	mature parasite-infected erythrocyte surface antigen	>PF3D7_0500800 organism=Plasmodium_falciparum_3D7 product=mature parasite-infected erythrocyte surface antigen (MESA) location=Pf3D7_05_v3:43327-47761(-) length=1434 sequence_SO=chromosome SO=protein_coding	1	K	DESDVEKAFRELQFIKLRDRTRPRKHVNVMG	6			1	ELQFIK(1)LR	FALSE	ELQFIK(73.26)LR	2	0.2572	73.2601	0.0163907	106.04	40.79	73.26											1	73.2601	0.0163907	106.04	14234000
PF3D7_0500800	214	214	PF3D7_0500800	mature parasite-infected erythrocyte surface antigen	>PF3D7_0500800 organism=Plasmodium_falciparum_3D7 product=mature parasite-infected erythrocyte surface antigen (MESA) location=Pf3D7_05_v3:43327-47761(-) length=1434 sequence_SO=chromosome SO=protein_coding	1	K	KHVNVMGESKETDESKETDESKETGESKETG	6			0.981754	ETDESK(0.982)ETDESK(0.018)ETGESK	FALSE	ETDESK(17.31)ETDESK(-17.31)ETGESK(-59)	3	0.72579	17.3086	1.09312e-06	75.017	66.124	75.017											0.981754	17.3086	1.09312e-06	75.017	7221100
PF3D7_0500800	885	885	PF3D7_0500800	mature parasite-infected erythrocyte surface antigen	>PF3D7_0500800 organism=Plasmodium_falciparum_3D7 product=mature parasite-infected erythrocyte surface antigen (MESA) location=Pf3D7_05_v3:43327-47761(-) length=1434 sequence_SO=chromosome SO=protein_coding	1	K	KVKKRVKKRNNKNERKDNVIGKEIMKEDVNE	1			1	K(1)DNVIGK	FALSE	K(75.93)DNVIGK(-75.93)	2	1.0153	75.9313	0.0260995	121.31	12.388	121.31						0.999134	30.6207	0.0397191	91.516	30865000	1	75.9313	0.0260995	121.31	72782000
PF3D7_0500800	199	199	PF3D7_0500800	mature parasite-infected erythrocyte surface antigen	>PF3D7_0500800 organism=Plasmodium_falciparum_3D7 product=mature parasite-infected erythrocyte surface antigen (MESA) location=Pf3D7_05_v3:43327-47761(-) length=1434 sequence_SO=chromosome SO=protein_coding	1	K	RELQFIKLRDRTRPRKHVNVMGESKETDESK	1			1	K(1)HVNVMGESK	FALSE	K(84.89)HVNVMGESK(-84.89)	2	0.15946	84.8884	0.00122734	116.55	77.242	90.614						1	63.4248	0.0099585	71.153	2508400	1	84.8884	0.00122734	116.55	18470000
PF3D7_0501000	164	164	PF3D7_0501000	Plasmodium exported protein, unknown function	>PF3D7_0501000 organism=Plasmodium_falciparum_3D7 product=Plasmodium exported protein, unknown function location=Pf3D7_05_v3:55841-56872(+) length=260 sequence_SO=chromosome SO=protein_coding	1	K	KEEEKLKNDLKIHFGKQHYALIKDIYKPIQS	5	.....GK......	motif4	1	IHFGK(1)QHYALIK	FALSE	IHFGK(69.07)QHYALIK(-69.07)	3	0.388	69.0664	5.33861e-05	94.363	74.156	94.363											1	69.0664	5.33861e-05	94.363	29312000	0.999988	49.3057	0.000291557	67.93	8824200
PF3D7_0501000	260	260	PF3D7_0501000	Plasmodium exported protein, unknown function	>PF3D7_0501000 organism=Plasmodium_falciparum_3D7 product=Plasmodium exported protein, unknown function location=Pf3D7_05_v3:55841-56872(+) length=260 sequence_SO=chromosome SO=protein_coding	1	K	FKLMHKSLRNEQESNK_______________	10			1	SLRNEQESNK(1)	TRUE	SLRNEQESNK(84.69)	2	0.33693	84.687	0.00276053	100.69	12.51	84.687											1	84.687	0.00276053	100.69	18448000
PF3D7_0501000	159	159	PF3D7_0501000	Plasmodium exported protein, unknown function	>PF3D7_0501000 organism=Plasmodium_falciparum_3D7 product=Plasmodium exported protein, unknown function location=Pf3D7_05_v3:55841-56872(+) length=260 sequence_SO=chromosome SO=protein_coding	1	K	DYVDKKEEEKLKNDLKIHFGKQHYALIKDIY	4			0.999553	NDLK(1)IHFGK	FALSE	NDLK(33.49)IHFGK(-33.49)	2	-0.69603	33.4927	0.00196272	82.287	49.024	82.287											0.999553	33.4927	0.00196272	82.287	12093000
PF3D7_0501000	175	175	PF3D7_0501000	Plasmodium exported protein, unknown function	>PF3D7_0501000 organism=Plasmodium_falciparum_3D7 product=Plasmodium exported protein, unknown function location=Pf3D7_05_v3:55841-56872(+) length=260 sequence_SO=chromosome SO=protein_coding	1	K	IHFGKQHYALIKDIYKPIQSYANNFSKVVDH	4	......K.....A	motif2	1	DIYK(1)PIQSYANNFSK	FALSE	DIYK(68.61)PIQSYANNFSK(-68.61)	2	0.029422	68.607	2.89455e-06	85.493	62.915	85.493											1	68.607	2.89455e-06	85.493	22198000	0.999994	52.5824	0.000236269	65.374	18086000
PF3D7_0501000	196	196	PF3D7_0501000	Plasmodium exported protein, unknown function	>PF3D7_0501000 organism=Plasmodium_falciparum_3D7 product=Plasmodium exported protein, unknown function location=Pf3D7_05_v3:55841-56872(+) length=260 sequence_SO=chromosome SO=protein_coding	1	K	ANNFSKVVDHYVGSLKRINNAFNLDILRTVI	10			1	VVDHYVGSLK(1)R	FALSE	VVDHYVGSLK(89.8)R	2	0.10195	89.8046	0.000911153	94.465	59.773	89.805						1	89.8046	0.00112545	89.805		1	73.4351	0.000911153	94.465	101950000	1	59.4177	0.00178895	59.418	13573000
PF3D7_0501200	320	320	PF3D7_0501200	parasite-infected erythrocyte surface protein	>PF3D7_0501200 organism=Plasmodium_falciparum_3D7 product=parasite-infected erythrocyte surface protein (PIESP2) location=Pf3D7_05_v3:64065-65489(+) length=408 sequence_SO=chromosome SO=protein_coding	1	K	SIEDKLLGSIFGYFKKNHDNLVKHLLQQINT	1			1	K(1)NHDNLVK	FALSE	K(104.89)NHDNLVK(-104.89)	2	-0.39077	104.886	0.00422091	148.62	76.905	148.62						1	104.886	0.00422091	148.62	189020000	1	91.5731	0.00719048	119.75	145550000	1	73.8191	0.0169385	89.08	6748900
PF3D7_0501200	154	154	PF3D7_0501200	parasite-infected erythrocyte surface protein	>PF3D7_0501200 organism=Plasmodium_falciparum_3D7 product=parasite-infected erythrocyte surface protein (PIESP2) location=Pf3D7_05_v3:64065-65489(+) length=408 sequence_SO=chromosome SO=protein_coding	1	K	ESNQHNYKEGPSYEDKKNMYKEILKGYYNVF	8			0.989191	EGPSYEDK(0.989)K(0.011)	FALSE	EGPSYEDK(19.61)K(-19.61)	2	-0.33411	19.615	0.00303272	109.88	80.568	109.88						0.989191	19.615	0.00303272	109.88	362450000	0.920723	10.6498	0.015729	72.243	736120000	0.870139	8.26108	0.0467662	52.579	15788000
PF3D7_0501200	159	159	PF3D7_0501200	parasite-infected erythrocyte surface protein	>PF3D7_0501200 organism=Plasmodium_falciparum_3D7 product=parasite-infected erythrocyte surface protein (PIESP2) location=Pf3D7_05_v3:64065-65489(+) length=408 sequence_SO=chromosome SO=protein_coding	1	K	NYKEGPSYEDKKNMYKEILKGYYNVFFENYA	4			0.999999	NMYK(1)EILK	FALSE	NMYK(60.9)EILK(-60.9)	2	-0.56857	60.9001	0.00494363	101.54	45.284	85.676						0.999996	53.915	0.00494363	101.43	164410000	0.999999	60.9001	0.0137484	101.54	95811000	0.999693	35.1334	0.0381006	77.732	4619800
PF3D7_0501200	155	155	PF3D7_0501200	parasite-infected erythrocyte surface protein	>PF3D7_0501200 organism=Plasmodium_falciparum_3D7 product=parasite-infected erythrocyte surface protein (PIESP2) location=Pf3D7_05_v3:64065-65489(+) length=408 sequence_SO=chromosome SO=protein_coding	1	K	SNQHNYKEGPSYEDKKNMYKEILKGYYNVFF	9			0.974412	EGPSYEDK(0.021)K(0.974)NMYK(0.005)	FALSE	EGPSYEDK(-16.67)K(16.67)NMYK(-23.26)	2	-0.10695	16.6673	0.000111895	95.417	71.066	74.987						0.974412	16.6673	0.000125213	90.793	136800000	0.887441	9.01221	0.000111895	95.417	257120000	0.829612	7.60872	0.000904516	65.043	15192000
PF3D7_0501200	114	114	PF3D7_0501200	parasite-infected erythrocyte surface protein	>PF3D7_0501200 organism=Plasmodium_falciparum_3D7 product=parasite-infected erythrocyte surface protein (PIESP2) location=Pf3D7_05_v3:64065-65489(+) length=408 sequence_SO=chromosome SO=protein_coding	1	K	NMNNHNSFNDKSVNKKEAFDQFLQTLLNNYE	1	......K.A....	motif1	1	K(1)EAFDQFLQTLLNNYEIMHK	FALSE	K(76.23)EAFDQFLQTLLNNYEIMHK(-76.23)	3	0.36321	76.2297	5.80362e-41	117.04	111.48	81.357											1	76.2297	5.80362e-41	117.04	18017000
PF3D7_0501200	138	138	PF3D7_0501200	parasite-infected erythrocyte surface protein	>PF3D7_0501200 organism=Plasmodium_falciparum_3D7 product=parasite-infected erythrocyte surface protein (PIESP2) location=Pf3D7_05_v3:64065-65489(+) length=408 sequence_SO=chromosome SO=protein_coding	1	K	TLLNNYEIMHKEDESKESNQHNYKEGPSYED	5			1	EDESK(1)ESNQHNYK	FALSE	EDESK(85.22)ESNQHNYK(-85.22)	2	-0.30704	85.2234	1.86553e-06	158.04	111.16	153.74											1	85.2234	1.86553e-06	158.04	536550000
PF3D7_0501200	146	146	PF3D7_0501200	parasite-infected erythrocyte surface protein	>PF3D7_0501200 organism=Plasmodium_falciparum_3D7 product=parasite-infected erythrocyte surface protein (PIESP2) location=Pf3D7_05_v3:64065-65489(+) length=408 sequence_SO=chromosome SO=protein_coding	1	K	MHKEDESKESNQHNYKEGPSYEDKKNMYKEI	8			1	ESNQHNYK(1)EGPSYEDKK	FALSE	ESNQHNYK(94.08)EGPSYEDK(-94.08)K(-104.44)	3	-0.67979	94.0838	1.35223e-12	140.46	129.03	128.28											1	94.0838	1.35223e-12	140.46	323390000
PF3D7_0501200	63	63	PF3D7_0501200	parasite-infected erythrocyte surface protein	>PF3D7_0501200 organism=Plasmodium_falciparum_3D7 product=parasite-infected erythrocyte surface protein (PIESP2) location=Pf3D7_05_v3:64065-65489(+) length=408 sequence_SO=chromosome SO=protein_coding	1	K	FNDMFANQKNTFNFLKHINHYKNEQDTNNTH	7			0.999961	NTFNFLK(1)HINHYK	FALSE	NTFNFLK(44.04)HINHYK(-44.04)	3	-0.65075	44.0416	5.45945e-05	85.522	72.73	85.522											0.999961	44.0416	5.45945e-05	85.522	20722000
PF3D7_0501200	289	289	PF3D7_0501200	parasite-infected erythrocyte surface protein	>PF3D7_0501200 organism=Plasmodium_falciparum_3D7 product=parasite-infected erythrocyte surface protein (PIESP2) location=Pf3D7_05_v3:64065-65489(+) length=408 sequence_SO=chromosome SO=protein_coding	1	K	SFPQAGEILREDLWNKEDNKFSYALDPNDYA	6			0.999918	EDLWNK(1)EDNK	FALSE	EDLWNK(40.87)EDNK(-40.87)	2	-0.31832	40.8668	0.00113983	127.76	90.421	127.76											0.999918	40.8668	0.00113983	127.76	15853000
PF3D7_0501200	109	109	PF3D7_0501200	parasite-infected erythrocyte surface protein	>PF3D7_0501200 organism=Plasmodium_falciparum_3D7 product=parasite-infected erythrocyte surface protein (PIESP2) location=Pf3D7_05_v3:64065-65489(+) length=408 sequence_SO=chromosome SO=protein_coding	1	K	EESNANMNNHNSFNDKSVNKKEAFDQFLQTL	18			0.980697	NHEESNANMNNHNSFNDK(0.981)SVNK(0.019)	FALSE	NHEESNANMNNHNSFNDK(17.06)SVNK(-17.06)	4	-1.3634	17.059	1.0751e-10	69.779	64.709	69.779											0.980697	17.059	1.0751e-10	69.779	12198000
PF3D7_0501200	133	133	PF3D7_0501200	parasite-infected erythrocyte surface protein	>PF3D7_0501200 organism=Plasmodium_falciparum_3D7 product=parasite-infected erythrocyte surface protein (PIESP2) location=Pf3D7_05_v3:64065-65489(+) length=408 sequence_SO=chromosome SO=protein_coding	1	K	DQFLQTLLNNYEIMHKEDESKESNQHNYKEG	19			0.998917	EAFDQFLQTLLNNYEIMHK(0.999)EDESK(0.001)	FALSE	EAFDQFLQTLLNNYEIMHK(29.65)EDESK(-29.65)	4	-0.77739	29.6509	3.111e-22	100.85	92.171	81.477						0.979214	16.7312	2.23E-17	89.721	18602000	0.998917	29.6509	3.111e-22	100.85	35146000
PF3D7_0501200	327	327	PF3D7_0501200	parasite-infected erythrocyte surface protein	>PF3D7_0501200 organism=Plasmodium_falciparum_3D7 product=parasite-infected erythrocyte surface protein (PIESP2) location=Pf3D7_05_v3:64065-65489(+) length=408 sequence_SO=chromosome SO=protein_coding	1	K	GSIFGYFKKNHDNLVKHLLQQINTYKHKYME	7			1	NHDNLVK(1)HLLQQINTYK	FALSE	NHDNLVK(77.42)HLLQQINTYK(-77.42)	4	-0.68366	77.4199	4.72734e-08	101.05	88.215	101.05											1	77.4199	4.72734e-08	101.05	31451000	0.999965	44.5121	2.03642e-06	68.413	32373000
PF3D7_0501300	327	327	PF3D7_0501300	skeleton-binding protein 1	>PF3D7_0501300 organism=Plasmodium_falciparum_3D7 product=skeleton-binding protein 1 (SBP1) location=Pf3D7_05_v3:68930-70113(+) length=337 sequence_SO=chromosome SO=protein_coding	1	K	AQQNTQQNTQQQSTTKSTTKTVARET_____	24			0.978894	TQQNPQQNAQQNTQQNTQQQSTTK(0.979)STTK(0.021)	FALSE	TQQNPQQNAQQNTQQNTQQQSTTK(16.66)STTK(-16.66)	3	-0.094505	16.6634	9.85337e-50	142.2	130.43	142.2											0.978894	16.6634	9.85337e-50	142.2	247450000
PF3D7_0503300	224	224	PF3D7_0503300	serine/arginine-rich splicing factor 12	>PF3D7_0503300 organism=Plasmodium_falciparum_3D7 product=serine/arginine-rich splicing factor 12 (SRSF12) location=Pf3D7_05_v3:135004-135930(-) length=308 sequence_SO=chromosome SO=protein_coding	1	K	TSRRASRHEKRNENYKSKYNHSNDDYSDETR	6			1	RNENYK(1)SK	FALSE	RNENYK(67.17)SK(-67.17)	2	-0.58321	67.1712	0.0161019	138.08	48.327	138.08																1	67.1712	0.0161019	138.08	50526000
PF3D7_0503400	122	122	PF3D7_0503400	actin-depolymerizing factor 1	>PF3D7_0503400 organism=Plasmodium_falciparum_3D7 product=actin-depolymerizing factor 1 (ADF1) location=Pf3D7_05_v3:140710-141471(+) length=122 sequence_SO=chromosome SO=protein_coding	1	K	VLTSVIESAQDVADLK_______________	22			1	KIEGVNVLTSVIESAQDVADLK(1)	TRUE	K(-91.37)IEGVNVLTSVIESAQDVADLK(91.37)	3	-0.29201	91.3708	2.70904e-20	93.583	84.3	93.583																1	91.3708	2.70904e-20	93.583	22597000
PF3D7_0503800	65	65	PF3D7_0503800	60S ribosomal protein L31	>PF3D7_0503800 organism=Plasmodium_falciparum_3D7 product=60S ribosomal protein L31 (RPL31) location=Pf3D7_05_v3:151422-152384(-) length=120 sequence_SO=chromosome SO=protein_coding	1	K	KLMHTKDVRLDVKLNKFIWSKGVRNPPKRVR	3			1	LNK(1)FIWSK	FALSE	LNK(79.81)FIWSK(-79.81)	2	0.67329	79.8148	0.0114464	120.87	60.849	116.37						1	63.1488	0.0114464	85.862	4210200						1	79.8148	0.0115041	120.87	31427000
PF3D7_0504900	86	86	PF3D7_0504900	conserved protein, unknown function	>PF3D7_0504900 organism=Plasmodium_falciparum_3D7 product=conserved protein, unknown function location=Pf3D7_05_v3:206450-208375(+) length=172 sequence_SO=chromosome SO=protein_coding	1	K	YWQLDKNKLPLSISDKSYDDAIYKTDEIFKK	10			0.998498	NK(0.001)LPLSISDK(0.998)SYDDAIYK(0.001)	FALSE	NK(-31.24)LPLSISDK(31.24)SYDDAIYK(-31.24)	3	-0.3769	31.2366	0.000808916	44.391	34.25	44.391																0.998498	31.2366	0.000808916	44.391	7668200
PF3D7_0505500	321	321	PF3D7_0505500	DNA mismatch repair protein MSH6, putative	>PF3D7_0505500 organism=Plasmodium_falciparum_3D7 product=DNA mismatch repair protein MSH6, putative (MSH6) location=Pf3D7_05_v3:239456-243880(-) length=1350 sequence_SO=chromosome SO=protein_coding	1	K	NIKKCIEKRKGDDSKKSQELDGLRNKYLNLP	1	......K.Q....	motif7	1	K(1)SQELDGLR	FALSE	K(77.66)SQELDGLR	2	1.8379	77.6625	0.0122968	77.662	38.358	77.662						1	77.6625	0.0122968	77.662	9374800
PF3D7_0507700	530	530	PF3D7_0507700	nuclear protein localization protein 4, putative	>PF3D7_0507700 organism=Plasmodium_falciparum_3D7 product=nuclear protein localization protein 4, putative (NPL4) location=Pf3D7_05_v3:316766-318361(-) length=531 sequence_SO=chromosome SO=protein_coding	1	K	KKEIDPIIEEMLTSVKI______________	14			1	EIDPIIEEMLTSVK(1)I	FALSE	EIDPIIEEMLTSVK(68.26)I	2	0.89944	68.2616	0.000232884	68.262	36.666	68.262																1	68.2616	0.000232884	68.262	71815000
PF3D7_0508300	2	2	PF3D7_0508300	triose phosphate transporter	>PF3D7_0508300 organism=Plasmodium_falciparum_3D7 product=triose phosphate transporter (TPT) location=Pf3D7_05_v3:342205-343233(+) length=342 sequence_SO=chromosome SO=protein_coding	1	K	______________MKDNEKKNEYGTFPITI	2			0.999997	MK(1)DNEK	FALSE	MK(55.85)DNEK(-55.85)	2	1.1431	55.8517	0.0354611	74.517	17.064	74.517											0.999997	55.8517	0.0354611	74.517	4310400
PF3D7_0510200	119	119	PF3D7_0510200	peptidyl-prolyl cis-trans isomerase	>PF3D7_0510200 organism=Plasmodium_falciparum_3D7 product=peptidyl-prolyl cis-trans isomerase (CYP87) location=Pf3D7_05_v3:437495-439738(+) length=747 sequence_SO=chromosome SO=protein_coding	1	K	LNKKKRKVKGIIEENKKNQEKMKKKKIRINN	9			0.985781	VKGIIEENK(0.986)K(0.014)	FALSE	VK(-38.53)GIIEENK(18.45)K(-18.45)	2	0.018178	18.4516	0.0297175	80.231	38.355	80.231																0.985781	18.4516	0.0297175	80.231	82526000
PF3D7_0510500	787	787	PF3D7_0510500	topoisomerase I	>PF3D7_0510500 organism=Plasmodium_falciparum_3D7 product=topoisomerase I (TopoI) location=Pf3D7_05_v3:445983-448502(-) length=839 sequence_SO=chromosome SO=protein_coding	1	K	KVELLNNQMKVRDDNKTIALGTSKINYMDPR	6	......K..A...	motif6	1	VRDDNK(1)TIALGTSK	FALSE	VRDDNK(65.97)TIALGTSK(-65.97)	3	1.5429	65.9696	0.000320328	71.98	51.174	71.98																1	65.9696	0.000320328	71.98	13831000
PF3D7_0512000	68	68	PF3D7_0512000	prefoldin subunit 6, putative	>PF3D7_0512000 organism=Plasmodium_falciparum_3D7 product=prefoldin subunit, putative location=Pf3D7_05_v3:527639-528666(+) length=119 sequence_SO=chromosome SO=protein_coding	1	K	LHKLVGLVLVKEEKSKCYDTISRRLQYITGE	2			1	SK(1)CYDTISR	FALSE	SK(65.28)CYDTISR	2	0.1679	65.2776	0.0176039	81.017	67.208	65.278						1	65.2776	0.0370207	65.278	11173000						1	73.4995	0.0176039	81.017	42905000
PF3D7_0512600	180	180	PF3D7_0512600	ras-related protein Rab-1B	>PF3D7_0512600 organism=Plasmodium_falciparum_3D7 product=ras-related protein Rab-1B (RAB1b) location=Pf3D7_05_v3:544540-545993(+) length=200 sequence_SO=chromosome SO=protein_coding	1	K	MAYEIKNKSQHETINKGKTNINLNARPIKDT	8			0.998793	SQHETINK(0.999)GK(0.001)	FALSE	SQHETINK(29.18)GK(-29.18)	2	0.78345	29.1767	0.00123537	145.28	104.11	135.8																0.998793	29.1767	0.00123537	145.28	24127000
PF3D7_0512600	116	116	PF3D7_0512600	ras-related protein Rab-1B	>PF3D7_0512600 organism=Plasmodium_falciparum_3D7 product=ras-related protein Rab-1B (RAB1b) location=Pf3D7_05_v3:544540-545993(+) length=200 sequence_SO=chromosome SO=protein_coding	1	K	NWIIEIEKYASEDVQKILIGNKIDLKNDRNV	8	A.....K......	motif8	0.999833	YASEDVQK(1)ILIGNK	FALSE	YASEDVQK(37.77)ILIGNK(-37.77)	3	0.10937	37.7725	4.87708e-05	76.073	64.814	76.073																0.999833	37.7725	8.31651e-05	76.073	58166000
PF3D7_0512600	193	193	PF3D7_0512600	ras-related protein Rab-1B	>PF3D7_0512600 organism=Plasmodium_falciparum_3D7 product=ras-related protein Rab-1B (RAB1b) location=Pf3D7_05_v3:544540-545993(+) length=200 sequence_SO=chromosome SO=protein_coding	1	K	INKGKTNINLNARPIKDTKKKCC________	11	..A...K......	motif11	0.994006	TNINLNARPIK(0.994)DTK(0.006)	FALSE	TNINLNARPIK(22.2)DTK(-22.2)	3	-0.17066	22.197	0.000166177	67.102	47.259	51.009																0.994006	22.197	0.000166177	67.102	20528000
PF3D7_0513800	186	186	PF3D7_0513800	ras-related protein Rab-1A	>PF3D7_0513800 organism=Plasmodium_falciparum_3D7 product=ras-related protein Rab-1A (RAB1a) location=Pf3D7_05_v3:585357-585980(-) length=207 sequence_SO=chromosome SO=protein_coding	1	K	QELIKKKKKKNFTSLKNNHAKLKLSTHDNSP	6			0.999378	NFTSLK(0.999)NNHAK(0.001)	FALSE	NFTSLK(32.06)NNHAK(-32.06)	2	-0.9988	32.0612	0.000269269	145.99	109.59	145.99																0.999378	32.0612	0.000975667	145.99	16662000
PF3D7_0513800	191	191	PF3D7_0513800	ras-related protein Rab-1A	>PF3D7_0513800 organism=Plasmodium_falciparum_3D7 product=ras-related protein Rab-1A (RAB1a) location=Pf3D7_05_v3:585357-585980(-) length=207 sequence_SO=chromosome SO=protein_coding	1	K	KKKKKNFTSLKNNHAKLKLSTHDNSPQSFCS	5	.....AK......	motif5	0.999999	NNHAK(1)LK	FALSE	NNHAK(59.49)LK(-59.49)	2	-0.32819	59.4882	0.0296401	132.53	79.844	132.53											0.999914	40.6773	0.0471444	105.2	9995100	0.999999	59.4882	0.0296401	132.53	104260000
PF3D7_0515000	591	591	PF3D7_0515000	pre-mRNA-splicing factor CWC2, putative	>PF3D7_0515000 organism=Plasmodium_falciparum_3D7 product=pre-mRNA-splicing factor CWC2, putative (CWC2) location=Pf3D7_05_v3:620810-623356(-) length=848 sequence_SO=chromosome SO=protein_coding	1	K	VAKYKCNPTKDSGYTKADKSYTSKQYFCIYF	6	......KA.....	motif3	0.995582	DSGYTK(0.996)ADK(0.004)	FALSE	DSGYTK(23.53)ADK(-23.53)	2	0.36258	23.5281	0.00513835	109.66	63.274	109.66																0.995582	23.5281	0.00513835	109.66	8291200
PF3D7_0515700	346	346	PF3D7_0515700	glideosome-associated protein 40, putative	>PF3D7_0515700 organism=Plasmodium_falciparum_3D7 product=glideosome-associated protein 40, putative (GAP40) location=Pf3D7_05_v3:653966-655336(-) length=456 sequence_SO=chromosome SO=protein_coding	1	K	AEDERKRKNPRASYAKSRQGTQASKPFLSSA	5	.....AK......	motif5	1	ASYAK(1)SR	FALSE	ASYAK(139.68)SR	2	0.21912	139.679	0.0259659	139.68	72.647	139.68																1	139.679	0.0259659	139.68	327720000
PF3D7_0515700	5	5	PF3D7_0515700	glideosome-associated protein 40, putative	>PF3D7_0515700 organism=Plasmodium_falciparum_3D7 product=glideosome-associated protein 40, putative (GAP40) location=Pf3D7_05_v3:653966-655336(-) length=456 sequence_SO=chromosome SO=protein_coding	1	K	___________MKFEKFNIPEWSDIERYFKD	5			0.805078	MK(0.195)FEK(0.805)FNIPEWSDIER	FALSE	MK(-6.16)FEK(6.16)FNIPEWSDIER	3	-0.61596	6.15977	0.00336679	41.088	36.33	41.088																0.805078	6.15977	0.00336679	41.088	4442000
PF3D7_0516200	106	106	PF3D7_0516200	40S ribosomal protein S11	>PF3D7_0516200 organism=Plasmodium_falciparum_3D7 product=40S ribosomal protein S11 location=Pf3D7_05_v3:675809-676614(-) length=151 sequence_SO=chromosome SO=protein_coding	1	K	TAIHIKLRASGGTKSKTPGPGAQSALRALAR	2	......K.....A	motif2	1	SK(1)TPGPGAQSALR	FALSE	SK(77.19)TPGPGAQSALR	3	0.27619	77.1919	9.93942e-05	77.192	63.183	77.192											1	77.1919	9.93942e-05	77.192	6462500	1	45.8732	0.0022755	45.873	9930600
PF3D7_0516700	758	758	PF3D7_0516700	ubiquitin carboxyl-terminal hydrolase 2, putative	>PF3D7_0516700 organism=Plasmodium_falciparum_3D7 product=ubiquitin carboxyl-terminal hydrolase 2, putative location=Pf3D7_05_v3:694492-698778(+) length=1332 sequence_SO=chromosome SO=protein_coding	1	K	TVKNKHSTNKIVKKRKGLLSNPLRKGTLGTD	1			0.999968	K(1)GLLSNPLRK	FALSE	K(44.98)GLLSNPLRK(-44.98)	3	0.3954	44.9825	0.014202	51.276	27.923	51.276																0.999968	44.9825	0.014202	51.276	3874400
PF3D7_0516700	752	752	PF3D7_0516700	ubiquitin carboxyl-terminal hydrolase 2, putative	>PF3D7_0516700 organism=Plasmodium_falciparum_3D7 product=ubiquitin carboxyl-terminal hydrolase 2, putative location=Pf3D7_05_v3:694492-698778(+) length=1332 sequence_SO=chromosome SO=protein_coding	1	K	ETNDKKTVKNKHSTNKIVKKRKGLLSNPLRK	5			1	HSTNK(1)IVK	FALSE	HSTNK(85.17)IVK(-85.17)	2	0.030386	85.1703	0.0147215	112.41	60.008	111.06																1	85.1703	0.0147215	112.41	41631000
PF3D7_0516900	37	37	PF3D7_0516900	60S ribosomal protein L2	>PF3D7_0516900 organism=Plasmodium_falciparum_3D7 product=60S ribosomal protein L2 (RPL2) location=Pf3D7_05_v3:712762-713772(-) length=260 sequence_SO=chromosome SO=protein_coding	1	K	HRKGAAKLRHLDYCEKKGYIKGLVKDIIHDP	7			0.999767	HLDYCEK(1)K	FALSE	HLDYCEK(36.33)K(-36.33)	2	-0.5289	36.3285	0.0031356	151.44	98.959	138.4											0.987588	19.0072	0.0170307	88.819	15891000	0.999767	36.3285	0.0031356	151.44	49409000
PF3D7_0517000	130	130	PF3D7_0517000	60S ribosomal protein L12, putative	>PF3D7_0517000 organism=Plasmodium_falciparum_3D7 product=60S ribosomal protein L12, putative location=Pf3D7_05_v3:715765-716675(-) length=165 sequence_SO=chromosome SO=protein_coding	1	K	VMKEKSRAKEFKGTVKEMLGTCNSIGCTVDG	4			1	GTVK(1)EMLGTCNSIGCTVDGK	FALSE	GTVK(64.26)EMLGTCNSIGCTVDGK(-64.26)	3	-0.92524	64.2578	9.22954e-09	72.883	67.355	72.883																1	64.2578	9.22954e-09	72.883	16501000
PF3D7_0517300	177	177	PF3D7_0517300	serine/arginine-rich splicing factor 1	>PF3D7_0517300 organism=Plasmodium_falciparum_3D7 product=serine/arginine-rich splicing factor 1 (SR1) location=Pf3D7_05_v3:724681-725751(-) length=298 sequence_SO=chromosome SO=protein_coding	1	K	IDKFNGSIFRSHEGEKSKISIRQKKTLWRRD	6			0.999121	SHEGEK(0.999)SK(0.001)	FALSE	SHEGEK(30.56)SK(-30.56)	2	0.07952	30.5567	0.036781	78.516	37.068	78.516																0.999121	30.5567	0.036781	78.516	5824100
PF3D7_0517400	767	767	PF3D7_0517400	FACT complex subunit SPT16, putative	>PF3D7_0517400 organism=Plasmodium_falciparum_3D7 product=FACT complex subunit SPT16, putative (FACT-L) location=Pf3D7_05_v3:731407-735162(+) length=1141 sequence_SO=chromosome SO=protein_coding	1	K	DVNESKTSQDRLVLNKSGRRIVLRDLMTRPN	5			1	LVLNK(1)SGR	FALSE	LVLNK(80.44)SGR	2	-0.33173	80.4381	0.0337636	80.438	23.261	80.438																1	80.4381	0.0337636	80.438	2775000
PF3D7_0517700	658	658	PF3D7_0517700	eukaryotic translation initiation factor 3 subunit B, putative	>PF3D7_0517700 organism=Plasmodium_falciparum_3D7 product=eukaryotic translation initiation factor 3 subunit B, putative (EIF3B) location=Pf3D7_05_v3:743179-745329(+) length=716 sequence_SO=chromosome SO=protein_coding	1	K	EKMKTAKKNALLTERKNVENSFNQKFQEITA	1	A.....K......	motif8	0.999997	K(1)NVENSFNQK	FALSE	K(54.92)NVENSFNQK(-54.92)	2	-0.91941	54.9238	0.0152452	63.624	28.932	63.624																0.999997	54.9238	0.0152452	63.624	2605500
PF3D7_0517700	478	478	PF3D7_0517700	eukaryotic translation initiation factor 3 subunit B, putative	>PF3D7_0517700 organism=Plasmodium_falciparum_3D7 product=eukaryotic translation initiation factor 3 subunit B, putative (EIF3B) location=Pf3D7_05_v3:743179-745329(+) length=716 sequence_SO=chromosome SO=protein_coding	1	K	NSNRFALILREETTNKQQIRFYKISNKGTAR	6	......K.Q....	motif7	1	EETTNK(1)QQIR	FALSE	EETTNK(61.78)QQIR	2	0.72328	61.7795	0.0285527	61.78	39.787	61.78																1	61.7795	0.0285527	61.78	1980900
PF3D7_0519700	89	89	PF3D7_0519700	FoP domain-containing protein, putative	>PF3D7_0519700 organism=Plasmodium_falciparum_3D7 product=conserved Plasmodium protein, unknown function location=Pf3D7_05_v3:817066-819139(+) length=192 sequence_SO=chromosome SO=protein_coding	1	K	GGNSFFSKNKRKLANKFQDKSFGNSNGNTTF	4	......K.Q....	motif7	0.999996	LANK(1)FQDK	FALSE	LANK(53.97)FQDK(-53.97)	2	-0.58999	53.972	0.00897837	125.31	53.365	125.31						0.999985	48.3494	0.0306347	85.676	10205000						0.999996	53.972	0.00897837	125.31	16322000
PF3D7_0519700	132	132	PF3D7_0519700	FoP domain-containing protein, putative	>PF3D7_0519700 organism=Plasmodium_falciparum_3D7 product=conserved Plasmodium protein, unknown function location=Pf3D7_05_v3:817066-819139(+) length=192 sequence_SO=chromosome SO=protein_coding	1	K	RTTFRNNKKRNVFFRKNQNLHDKIGKLTSKD	1	......K.Q....	motif7	1	K(1)NQNLHDK	FALSE	K(89.65)NQNLHDK(-89.65)	2	-0.61554	89.6513	0.00741896	119.07	51.604	119.07																1	89.6513	0.00741896	119.07	14850000
PF3D7_0519700	81	81	PF3D7_0519700	FoP domain-containing protein, putative	>PF3D7_0519700 organism=Plasmodium_falciparum_3D7 product=conserved Plasmodium protein, unknown function location=Pf3D7_05_v3:817066-819139(+) length=192 sequence_SO=chromosome SO=protein_coding	1	K	MNRKFTKRGGNSFFSKNKRKLANKFQDKSFG	8	......K.....A	motif2	0.966943	GGNSFFSK(0.967)NK(0.033)	FALSE	GGNSFFSK(14.66)NK(-14.66)	2	0.44671	14.6614	0.00516564	68.525	50.706	62.633						0.965207	14.4313	0.0188342	68.525	4730800						0.966943	14.6614	0.00516564	62.633	17045000
PF3D7_0519700	40	40	PF3D7_0519700	FoP domain-containing protein, putative	>PF3D7_0519700 organism=Plasmodium_falciparum_3D7 product=conserved Plasmodium protein, unknown function location=Pf3D7_05_v3:817066-819139(+) length=192 sequence_SO=chromosome SO=protein_coding	1	K	FSKFSYQANNRGKLFKFTPQKKKVDVRKHIF	3			0.999985	LFK(1)FTPQKK	FALSE	LFK(48.45)FTPQK(-48.45)K(-59.76)	3	-0.285	48.4466	0.00765994	68.224	34.961	68.224																0.999985	48.4466	0.00765994	68.224	5783100
PF3D7_0520900	380	380	PF3D7_0520900	adenosylhomocysteinase	>PF3D7_0520900 organism=Plasmodium_falciparum_3D7 product=S-adenosyl-L-homocysteine hydrolase (SAHH) location=Pf3D7_05_v3:857038-858477(+) length=479 sequence_SO=chromosome SO=protein_coding	1	K	NVKPQVDRITLPNGNKIIVLARGRLLNLGCA	8			1	ITLPNGNK(1)IIVLAR	FALSE	ITLPNGNK(46.07)IIVLAR	3	0.32778	46.0691	0.000129077	70.089	64.374	46.069																1	46.0691	0.000129077	70.089	4016400
PF3D7_0522600	412	412	PF3D7_0522600	inner membrane complex protein	>PF3D7_0522600 organism=Plasmodium_falciparum_3D7 product=inner membrane complex protein location=Pf3D7_05_v3:940249-941700(+) length=483 sequence_SO=chromosome SO=protein_coding	1	K	GLFPVSLLGTTVGRKKFRPLYERFRRTRSIL	1			1	K(1)FRPLYER	FALSE	K(47.6)FRPLYER	3	-0.22988	47.6028	0.00503871	78.098	49.14	47.603																1	47.6028	0.00503871	78.098	31354000
PF3D7_0523000	26	26	PF3D7_0523000	multidrug resistance protein 1	>PF3D7_0523000 organism=Plasmodium_falciparum_3D7 product=multidrug resistance protein 1 (MDR1) location=Pf3D7_05_v3:957890-962149(+) length=1419 sequence_SO=chromosome SO=protein_coding	1	K	GNLSIKEEVEKELNKKSTAELFRKIKNEKIS	1	......K..A...	motif6	1	K(1)STAELFR	FALSE	K(109.11)STAELFR	2	-0.47288	109.11	0.0089753	110.76	49.196	109.11	1	82.645	0.0162348	91.069	25323000	1	109.11	0.00923087	109.11	155130000	1	109.714	0.0089753	110.76	545270000	1	70.8162	0.0177909	86.67	71830000
PF3D7_0523000	1091	1091	PF3D7_0523000	multidrug resistance protein 1	>PF3D7_0523000 organism=Plasmodium_falciparum_3D7 product=multidrug resistance protein 1 (MDR1) location=Pf3D7_05_v3:957890-962149(+) length=1419 sequence_SO=chromosome SO=protein_coding	1	K	YAGKLMSLKGDSENAKLSFEKYYPLMIRKSN	7	.....AK......	motif5	0.999993	GDSENAK(1)LSFEK	FALSE	GDSENAK(51.62)LSFEK(-51.62)	2	0.074205	51.6194	0.00194993	75.088	58.71	75.088											0.999993	51.6194	0.00194993	75.088	8288000
PF3D7_0523000	1084	1084	PF3D7_0523000	multidrug resistance protein 1	>PF3D7_0523000 organism=Plasmodium_falciparum_3D7 product=multidrug resistance protein 1 (MDR1) location=Pf3D7_05_v3:957890-962149(+) length=1419 sequence_SO=chromosome SO=protein_coding	1	K	TFIFTGSYAGKLMSLKGDSENAKLSFEKYYP	5	......K.....A	motif2	0.999974	LMSLK(1)GDSENAK	FALSE	LMSLK(45.91)GDSENAK(-45.91)	2	0.031467	45.9094	0.000666143	101.72	63.152	98.156											0.999974	45.9094	0.000666143	101.72	13341000
PF3D7_0523000	747	747	PF3D7_0523000	multidrug resistance protein 1	>PF3D7_0523000 organism=Plasmodium_falciparum_3D7 product=multidrug resistance protein 1 (MDR1) location=Pf3D7_05_v3:957890-962149(+) length=1419 sequence_SO=chromosome SO=protein_coding	1	K	LSIHENENISNNRNCKNTAENEKEEKVPFFK	3	......K..A...	motif6	1	NCK(1)NTAENEKEEK	FALSE	NCK(79.63)NTAENEK(-79.63)EEK(-124.38)	3	-0.68663	79.6264	4.36693e-07	158.58	112.75	156.81											1	79.6264	4.36693e-07	158.58	103710000
PF3D7_0523000	522	522	PF3D7_0523000	multidrug resistance protein 1	>PF3D7_0523000 organism=Plasmodium_falciparum_3D7 product=multidrug resistance protein 1 (MDR1) location=Pf3D7_05_v3:957890-962149(+) length=1419 sequence_SO=chromosome SO=protein_coding	1	K	LISNSMTSNELLEMKKEYQTIKDSDVVDVSK	1			1	K(1)EYQTIK	FALSE	K(115.05)EYQTIK(-115.05)	2	0.20884	115.048	0.0291561	117.89	49.098	117.89											1	115.048	0.0291561	117.89	22251000
PF3D7_0523000	16	16	PF3D7_0523000	multidrug resistance protein 1	>PF3D7_0523000 organism=Plasmodium_falciparum_3D7 product=multidrug resistance protein 1 (MDR1) location=Pf3D7_05_v3:957890-962149(+) length=1419 sequence_SO=chromosome SO=protein_coding	1	K	MGKEQKEKKDGNLSIKEEVEKELNKKSTAEL	7			1	DGNLSIK(1)EEVEK	FALSE	DGNLSIK(65.94)EEVEK(-65.94)	2	-0.66175	65.938	0.000378328	137.84	53.974	119.39											1	65.938	0.000378328	137.84	19439000
PF3D7_0523000	251	251	PF3D7_0523000	multidrug resistance protein 1	>PF3D7_0523000 organism=Plasmodium_falciparum_3D7 product=multidrug resistance protein 1 (MDR1) location=Pf3D7_05_v3:957890-962149(+) length=1419 sequence_SO=chromosome SO=protein_coding	1	K	EALMGIRTVASYCGEKTILNKFNLSETFYSK	9	A.....K......	motif8	0.991231	TVASYCGEK(0.991)TILNK(0.009)	FALSE	TVASYCGEK(20.53)TILNK(-20.53)	3	-0.16292	20.5322	0.000224673	65.043	46.418	65.043																0.991231	20.5322	0.000224673	65.043	7099400
PF3D7_0523000	128	128	PF3D7_0523000	multidrug resistance protein 1	>PF3D7_0523000 organism=Plasmodium_falciparum_3D7 product=multidrug resistance protein 1 (MDR1) location=Pf3D7_05_v3:957890-962149(+) length=1419 sequence_SO=chromosome SO=protein_coding	1	K	SYCMDVITSKILKTLKLEYLRSVFYQDGQFH	3			1	TLK(1)LEYLR	FALSE	TLK(82.28)LEYLR	2	-0.84283	82.2787	0.032664	82.279	6.5406	82.279																1	82.2787	0.032664	82.279	5166100
PF3D7_0523400	36	36	PF3D7_0523400	DnaJ protein, putative	>PF3D7_0523400 organism=Plasmodium_falciparum_3D7 product=DnaJ protein, putative location=Pf3D7_05_v3:973518-975876(+) length=533 sequence_SO=chromosome SO=protein_coding	1	K	NNQIVPKYNNNYETEKEEKNLISNIFSTRRP	9			0.998098	YNNNYETEK(0.998)EEK(0.002)	FALSE	YNNNYETEK(27.2)EEK(-27.2)	3	-0.17607	27.1987	8.90247e-05	80.17	69.608	56.414																0.998098	27.1987	0.000942024	56.414	3074900
PF3D7_0523400	514	514	PF3D7_0523400	DnaJ protein, putative	>PF3D7_0523400 organism=Plasmodium_falciparum_3D7 product=DnaJ protein, putative location=Pf3D7_05_v3:973518-975876(+) length=533 sequence_SO=chromosome SO=protein_coding	1	K	KIIYDFKKNTEIMDTKKLFEDACMRACQKQD	8	......K.....A	motif2	0.891797	NTEIMDTK(0.892)K(0.108)	FALSE	NTEIMDTK(9.16)K(-9.16)	2	-0.36984	9.16028	0.0242274	87.258	41.66	87.258											0.891797	9.16028	0.0242274	87.258
PF3D7_0523400	212	212	PF3D7_0523400	DnaJ protein, putative	>PF3D7_0523400 organism=Plasmodium_falciparum_3D7 product=DnaJ protein, putative location=Pf3D7_05_v3:973518-975876(+) length=533 sequence_SO=chromosome SO=protein_coding	1	K	YRILKVPTDASQNEIKRQYYKLAKEFHPDKC	11	......K.Q....	motif7	1	VPTDASQNEIK(1)R	FALSE	VPTDASQNEIK(41.34)R	3	0.62258	41.3393	0.00624228	41.339	19.011	41.339																1	41.3393	0.00624228	41.339	6980900
PF3D7_0523400	132	132	PF3D7_0523400	DnaJ protein, putative	>PF3D7_0523400 organism=Plasmodium_falciparum_3D7 product=DnaJ protein, putative location=Pf3D7_05_v3:973518-975876(+) length=533 sequence_SO=chromosome SO=protein_coding	1	K	QIGRGIMNTPESITQKALGKIWDDEKREWYD	12	......KA.....	motif3	0.974376	GIMNTPESITQK(0.974)ALGK(0.026)	FALSE	GIMNTPESITQK(15.8)ALGK(-15.8)	3	-0.5298	15.8008	0.000357	46.89	36.759	46.89																0.974376	15.8008	0.000357	46.89	6629100
PF3D7_0523400	136	136	PF3D7_0523400	DnaJ protein, putative	>PF3D7_0523400 organism=Plasmodium_falciparum_3D7 product=DnaJ protein, putative location=Pf3D7_05_v3:973518-975876(+) length=533 sequence_SO=chromosome SO=protein_coding	1	K	GIMNTPESITQKALGKIWDDEKREWYDFYYN	4	.....GK......	motif4	0.999213	ALGK(0.999)IWDDEK(0.001)R	FALSE	ALGK(31.04)IWDDEK(-31.04)R	3	-0.29582	31.0382	0.0138623	44.847	36.715	44.847																0.999213	31.0382	0.0138623	44.847	8899700
PF3D7_0523800	222	222	PF3D7_0523800	divalent metal transporter, putative	>PF3D7_0523800 organism=Plasmodium_falciparum_3D7 product=transporter, putative location=Pf3D7_05_v3:990005-992059(+) length=684 sequence_SO=chromosome SO=protein_coding	1	K	YCISDNLDEITSYRNKLSLYNKLRMCFNYFG	2			1	NK(1)LSLYNK	FALSE	NK(81.06)LSLYNK(-81.06)	2	0.32422	81.0641	0.005482	144.12	8.3552	125.82						1	81.0641	0.005482	144.12	42953000	1	70.7471	0.0206684	100.02	16248000
PF3D7_0525100	20	20	PF3D7_0525100	acyl-CoA synthetase	>PF3D7_0525100 organism=Plasmodium_falciparum_3D7 product=acyl-CoA synthetase (ACS10) location=Pf3D7_05_v3:1041745-1043766(+) length=673 sequence_SO=chromosome SO=protein_coding	1	K	NNEILYSVKISEPRDKNSTGIYRHPEYKDKL	2			1	DK(1)NSTGIYR	FALSE	DK(115.71)NSTGIYR	2	0.25246	115.714	0.00253221	126.24	51.053	115.71																1	115.714	0.00253221	126.24	78417000
PF3D7_0525100	593	593	PF3D7_0525100	acyl-CoA synthetase	>PF3D7_0525100 organism=Plasmodium_falciparum_3D7 product=acyl-CoA synthetase (ACS10) location=Pf3D7_05_v3:1041745-1043766(+) length=673 sequence_SO=chromosome SO=protein_coding	1	K	PSTDSIDIWRTQKKIKATDEEVIKLPEFKAD	2	......KA.....	motif3	0.999897	IK(1)ATDEEVIKLPEFK	FALSE	IK(39.93)ATDEEVIK(-39.93)LPEFK(-58.32)	3	-0.15552	39.9295	0.000400957	58.32	41.204	58.32																0.999897	39.9295	0.000400957	58.32	7791500
PF3D7_0525100	34	34	PF3D7_0525100	acyl-CoA synthetase	>PF3D7_0525100 organism=Plasmodium_falciparum_3D7 product=acyl-CoA synthetase (ACS10) location=Pf3D7_05_v3:1041745-1043766(+) length=673 sequence_SO=chromosome SO=protein_coding	1	K	DKNSTGIYRHPEYKDKLCENFDDKKFNNMWE	2			0.999998	DK(1)LCENFDDKK	FALSE	DK(58.8)LCENFDDK(-58.8)K(-66.53)	3	-0.47271	58.7952	0.00196272	69.721	50.062	69.721																0.999998	58.7952	0.00196272	69.721	5680600
PF3D7_0525400	71	71	PF3D7_0525400	7-helix-1 protein	>PF3D7_0525400 organism=Plasmodium_falciparum_3D7 product=G-protein coupled receptor, putative location=Pf3D7_05_v3:1057651-1059054(+) length=467 sequence_SO=chromosome SO=protein_coding	1	K	ILYMNMILYENSKDKKYLDYCEDIIRYMDNY	1			1	K(1)YLDYCEDIIR	FALSE	K(60.26)YLDYCEDIIR	3	0.22375	60.2551	0.00170127	60.255	47.463	60.255																1	60.2551	0.00170127	60.255	1889400
PF3D7_0525800	286	286	PF3D7_0525800	inner membrane complex protein 1g, putative	>PF3D7_0525800 organism=Plasmodium_falciparum_3D7 product=inner membrane complex protein 1g, putative (IMC1g) location=Pf3D7_05_v3:1071247-1072149(+) length=300 sequence_SO=chromosome SO=protein_coding	1	K	IYKSKDSGFPSIRIAKTPQMFQRNLYCSYA_	3	.....AK......	motif5	1	IAK(1)TPQMFQR	FALSE	IAK(50.11)TPQMFQR	3	-0.19306	50.1076	0.000230991	114.4	98.537	50.108																1	101.646	0.000230991	101.65	30113000
PF3D7_0525800	275	275	PF3D7_0525800	inner membrane complex protein 1g, putative	>PF3D7_0525800 organism=Plasmodium_falciparum_3D7 product=inner membrane complex protein 1g, putative (IMC1g) location=Pf3D7_05_v3:1071247-1072149(+) length=300 sequence_SO=chromosome SO=protein_coding	1	K	PEKEKRFSSISIYKSKDSGFPSIRIAKTPQM	2	......K..G...	motif9	1	SK(1)DSGFPSIR	FALSE	SK(65.18)DSGFPSIR	2	-0.28033	65.1792	0.00472039	91.313	45.575	65.179																1	65.1792	0.00472039	91.313	29461000
PF3D7_0525800	262	262	PF3D7_0525800	inner membrane complex protein 1g, putative	>PF3D7_0525800 organism=Plasmodium_falciparum_3D7 product=inner membrane complex protein 1g, putative (IMC1g) location=Pf3D7_05_v3:1071247-1072149(+) length=300 sequence_SO=chromosome SO=protein_coding	1	K	NFSKIGNPLCKGGPEKEKRFSSISIYKSKDS	5			0.991929	GGPEK(0.992)EK(0.008)	FALSE	GGPEK(20.9)EK(-20.9)	2	-0.53034	20.8957	0.0120607	104.21	26.489	104.21																0.991929	20.8957	0.0120607	104.21
PF3D7_0525800	143	143	PF3D7_0525800	inner membrane complex protein 1g, putative	>PF3D7_0525800 organism=Plasmodium_falciparum_3D7 product=inner membrane complex protein 1g, putative (IMC1g) location=Pf3D7_05_v3:1071247-1072149(+) length=300 sequence_SO=chromosome SO=protein_coding	1	K	NRERIITVPRYMVVEKVIPVLKTSKRESIME	6			0.998074	YMVVEK(0.998)VIPVLK(0.002)	FALSE	YMVVEK(27.15)VIPVLK(-27.15)	3	-1.0954	27.146	0.00898522	56.087	50.139	40.154																0.998074	27.146	0.00898522	40.154	4939900
PF3D7_0525800	257	257	PF3D7_0525800	inner membrane complex protein 1g, putative	>PF3D7_0525800 organism=Plasmodium_falciparum_3D7 product=inner membrane complex protein 1g, putative (IMC1g) location=Pf3D7_05_v3:1071247-1072149(+) length=300 sequence_SO=chromosome SO=protein_coding	1	K	LPNYPNFSKIGNPLCKGGPEKEKRFSSISIY	7			0.998942	IGNPLCK(0.999)GGPEK(0.001)	FALSE	IGNPLCK(29.75)GGPEK(-29.75)	2	-0.37094	29.7499	7.79831e-07	130.15	105.38	64.827																0.998942	29.7499	0.00123167	64.827	14293000
PF3D7_0525800	6	6	PF3D7_0525800	inner membrane complex protein 1g, putative	>PF3D7_0525800 organism=Plasmodium_falciparum_3D7 product=inner membrane complex protein 1g, putative (IMC1g) location=Pf3D7_05_v3:1071247-1072149(+) length=300 sequence_SO=chromosome SO=protein_coding	1	K	__________MCSTNKNLACCKGDNVFDGQI	5			0.999999	CSTNK(1)NLACCK	FALSE	CSTNK(58.85)NLACCK(-58.85)	2	-0.74146	58.8508	0.000159902	114.89	94.607	114.89																0.999999	58.8508	0.000159902	114.89	34021000
PF3D7_0525800	87	87	PF3D7_0525800	inner membrane complex protein 1g, putative	>PF3D7_0525800 organism=Plasmodium_falciparum_3D7 product=inner membrane complex protein 1g, putative (IMC1g) location=Pf3D7_05_v3:1071247-1072149(+) length=300 sequence_SO=chromosome SO=protein_coding	1	K	IVEQIRPVIKYKNVYKPKIVYVEKVKNVDKI	6			0.988805	YKNVYK(0.989)PK(0.011)	FALSE	YK(-33.37)NVYK(19.64)PK(-19.64)	2	-0.92262	19.641	0.0321101	83.206	46.811	83.206																0.988805	19.641	0.0321101	83.206	8460100
PF3D7_0525800	273	273	PF3D7_0525800	inner membrane complex protein 1g, putative	>PF3D7_0525800 organism=Plasmodium_falciparum_3D7 product=inner membrane complex protein 1g, putative (IMC1g) location=Pf3D7_05_v3:1071247-1072149(+) length=300 sequence_SO=chromosome SO=protein_coding	1	K	GGPEKEKRFSSISIYKSKDSGFPSIRIAKTP	9			0.784589	RFSSISIYK(0.785)SK(0.215)	FALSE	RFSSISIYK(5.61)SK(-5.61)	3	-0.14091	5.61374	0.0177965	42.031	19.453	42.031																0.784589	5.61374	0.0177965	42.031	2033800
PF3D7_0527000	604	604	PF3D7_0527000	DNA replication licensing factor MCM3, putative	>PF3D7_0527000 organism=Plasmodium_falciparum_3D7 product=DNA replication licensing factor MCM3, putative (MCM3) location=Pf3D7_05_v3:1125099-1128146(-) length=962 sequence_SO=chromosome SO=protein_coding	1	K	DDERIAESVLRNVTEKAKPIMNESRNNQKNF	5	......KA.....	motif3	0.976666	NVTEK(0.977)AK(0.023)PIMNESR	FALSE	NVTEK(16.22)AK(-16.22)PIMNESR	3	0.71136	16.2176	0.000100343	73.834	53.71	60.657						0.976666	16.2176	0.000100343	73.834	28255000
PF3D7_0527100	81	81	PF3D7_0527100	ubiquitin-conjugating enzyme E2 N, putative	>PF3D7_0527100 organism=Plasmodium_falciparum_3D7 product=ubiquitin-conjugating enzyme E2 N, putative (UBC13) location=Pf3D7_05_v3:1129959-1130754(-) length=152 sequence_SO=chromosome SO=protein_coding	1	K	PKVRFLTKIYHPNIDKLGRICLDILKDKWSP	8			1	IYHPNIDK(1)LGR	FALSE	IYHPNIDK(61.34)LGR	3	-0.23366	61.3438	0.000137816	94.767	74.561	61.344	1	61.3438	0.00803757	61.344	24515000											1	41.1636	0.000137816	94.767	76321000
PF3D7_0527100;tr|F8VQQ8|F8VQQ8_HUMAN;sp|P61088|UBE2N_HUMAN		93	PF3D7_0527100	ubiquitin-conjugating enzyme E2 N, putative	>PF3D7_0527100 organism=Plasmodium_falciparum_3D7 product=ubiquitin-conjugating enzyme E2 N, putative (UBC13) location=Pf3D7_05_v3:1129959-1130754(-) length=152 sequence_SO=chromosome SO=protein_coding;>tr|F8VQQ8|F8VQQ8_HUMAN Ubiquitin-conjugating enzyme	1	K	NIDKLGRICLDILKDKWSPALQIRTVLLSIQ	9			0.964394	ICLDILK(0.036)DK(0.964)WSPALQIR	FALSE	ICLDILK(-14.33)DK(14.33)WSPALQIR	3	-0.33314	14.3273	9.15402e-16	163.8	133.04	125.67	0.921372	10.6886	8.39E-08	88.768	12511000	0.802183	6.08011	2.22E-07	89.484		0.708175	3.85019	0.000343884	60.398	4894900	0.964394	14.3273	9.15402e-16	163.8
PF3D7_0527100;tr|F8VQQ8|F8VQQ8_HUMAN;sp|P61088|UBE2N_HUMAN		91	PF3D7_0527100	ubiquitin-conjugating enzyme E2 N, putative	>PF3D7_0527100 organism=Plasmodium_falciparum_3D7 product=ubiquitin-conjugating enzyme E2 N, putative (UBC13) location=Pf3D7_05_v3:1129959-1130754(-) length=152 sequence_SO=chromosome SO=protein_coding;>tr|F8VQQ8|F8VQQ8_HUMAN Ubiquitin-conjugating enzyme	1	K	HPNIDKLGRICLDILKDKWSPALQIRTVLLS	7	......K.....A	motif2	0.999525	ICLDILK(1)DK	FALSE	ICLDILK(33.23)DK(-33.23)	3	-0.028427	33.2268	2.97614e-08	141.02	81.951	82.645	0.677441	3.22263	5.51E-05	62.203		0.96772	14.7682	0.0101586	95.523	41310000	0.977866	16.4522	0.000343884	109.29	38382000	0.999525	33.2268	4.61454e-08	111.22	29946000
PF3D7_0527500	34	34	PF3D7_0527500	Hsc70-interacting protein	>PF3D7_0527500 organism=Plasmodium_falciparum_3D7 product=Hsc70-interacting protein (HIP) location=Pf3D7_05_v3:1143618-1145359(+) length=458 sequence_SO=chromosome SO=protein_coding	1	K	ENPSILLKPELGFFKKFIESFGGKVSKDKEF	1			1	K(1)FIESFGGK	FALSE	K(104.25)FIESFGGK(-104.25)	2	-0.29393	104.249	0.00122795	128.27	28.081	109.79						0.999999	61.078	0.0486839	67.113							1	104.249	0.00122795	128.27	54935000
PF3D7_0527500	42	42	PF3D7_0527500	Hsc70-interacting protein	>PF3D7_0527500 organism=Plasmodium_falciparum_3D7 product=Hsc70-interacting protein (HIP) location=Pf3D7_05_v3:1143618-1145359(+) length=458 sequence_SO=chromosome SO=protein_coding	1	K	PELGFFKKFIESFGGKVSKDKEFFEKSASDE	8	.....GK......	motif4	0.973973	FIESFGGK(0.974)VSK(0.026)	FALSE	FIESFGGK(15.73)VSK(-15.73)	2	0.37599	15.7312	0.00593005	65.179	20.098	65.179																0.973973	15.7312	0.0113559	65.179	20841000
PF3D7_0527500	45	45	PF3D7_0527500	Hsc70-interacting protein	>PF3D7_0527500 organism=Plasmodium_falciparum_3D7 product=Hsc70-interacting protein (HIP) location=Pf3D7_05_v3:1143618-1145359(+) length=458 sequence_SO=chromosome SO=protein_coding	1	K	GFFKKFIESFGGKVSKDKEFFEKSASDESTE	3			0.947383	VSK(0.947)DK(0.053)EFFEK	FALSE	VSK(12.55)DK(-12.55)EFFEK(-49.16)	3	0.34436	12.555	0.0107628	54.259	32.232	54.259																0.947383	12.555	0.0107628	54.259	6082500
PF3D7_0528400	352	352	PF3D7_0528400	palmitoyltransferase DHHC7	>PF3D7_0528400 organism=Plasmodium_falciparum_3D7 product=palmitoyltransferase (DHHC7) location=Pf3D7_05_v3:1171659-1173890(+) length=406 sequence_SO=chromosome SO=protein_coding	1	K	KQTNYQNQSYSKYYNKGFYKNFKDVFGESPF	4			0.999996	YYNK(1)GFYK	FALSE	YYNK(54)GFYK(-54)	2	0.75828	53.9951	0.0119211	114.78	114.78	114.78																0.999996	53.7946	0.0119211	101.64	69288000
PF3D7_0528400	377	377	PF3D7_0528400	palmitoyltransferase DHHC7	>PF3D7_0528400 organism=Plasmodium_falciparum_3D7 product=palmitoyltransferase (DHHC7) location=Pf3D7_05_v3:1171659-1173890(+) length=406 sequence_SO=chromosome SO=protein_coding	1	K	FGESPFLWFLPIDNRKGDGIYFMKGYIKEYS	1	......K..G...	motif9	1	K(1)GDGIYFMK	FALSE	K(107.81)GDGIYFMK(-107.81)	2	-0.14722	107.805	0.00212156	121.6	61.584	121.6																1	107.805	0.00212156	121.6	2873600
PF3D7_0528400	95	95	PF3D7_0528400	palmitoyltransferase DHHC7	>PF3D7_0528400 organism=Plasmodium_falciparum_3D7 product=palmitoyltransferase (DHHC7) location=Pf3D7_05_v3:1171659-1173890(+) length=406 sequence_SO=chromosome SO=protein_coding	1	K	DTSNNVMLERTNNHPKVERSFRLQNNKNKFV	6			1	TNNHPK(1)VER	FALSE	TNNHPK(103.08)VER	2	0.052336	103.083	0.00193234	132.85	101.56	103.08																1	103.083	0.00193234	132.85	45798000
PF3D7_0528400	65	65	PF3D7_0528400	palmitoyltransferase DHHC7	>PF3D7_0528400 organism=Plasmodium_falciparum_3D7 product=palmitoyltransferase (DHHC7) location=Pf3D7_05_v3:1171659-1173890(+) length=406 sequence_SO=chromosome SO=protein_coding	1	K	ENIKYSSDKSIINVTKGMKDNFKEDDDSTLD	7			0.994372	SIINVTK(0.994)GMK(0.006)	FALSE	SIINVTK(22.47)GMK(-22.47)	2	-0.3652	22.472	0.00865496	89.679	28.085	89.679																0.994372	22.472	0.00865496	89.679
PF3D7_0528400	385	385	PF3D7_0528400	palmitoyltransferase DHHC7	>PF3D7_0528400 organism=Plasmodium_falciparum_3D7 product=palmitoyltransferase (DHHC7) location=Pf3D7_05_v3:1171659-1173890(+) length=406 sequence_SO=chromosome SO=protein_coding	1	K	FLPIDNRKGDGIYFMKGYIKEYSEKSVEEII	9			0.999418	KGDGIYFMK(0.999)GYIK(0.001)	FALSE	K(-52.77)GDGIYFMK(32.39)GYIK(-32.39)	3	-0.71026	32.388	0.00093012	64.827	50.381	64.827																0.999418	32.388	0.00093012	64.827	29071000
PF3D7_0530100	16	16	PF3D7_0530100	SNARE protein, putative	>PF3D7_0530100 organism=Plasmodium_falciparum_3D7 product=SNARE protein, putative (SYN6) location=Pf3D7_05_v3:1226883-1227757(+) length=225 sequence_SO=chromosome SO=protein_coding	2	K	MDLWDKDYQKALQTGKDIKKLLKQSEKEKKK	10	.....GK......	motif4	1	DYQK(1)ALQTGK(1)	FALSE	DYQK(40.99)ALQTGK(40.99)	3	3.6564	40.9939	0.00988739	40.994	13.845	40.994																1	40.9939	0.00988739	40.994
PF3D7_0530100	10	10	PF3D7_0530100	SNARE protein, putative	>PF3D7_0530100 organism=Plasmodium_falciparum_3D7 product=SNARE protein, putative (SYN6) location=Pf3D7_05_v3:1226883-1227757(+) length=225 sequence_SO=chromosome SO=protein_coding	2	K	______MDLWDKDYQKALQTGKDIKKLLKQS	4	......KA.....	motif3	1	DYQK(1)ALQTGK(1)	TRUE	DYQK(40.99)ALQTGK(40.99)	3	3.6564	40.9939	0.00988739	40.994	13.845	40.994																1	40.9939	0.00988739	40.994
PF3D7_0532300	247	247	PF3D7_0532300	Plasmodium exported protein (PHISTb), unknown function	>PF3D7_0532300 organism=Plasmodium_falciparum_3D7 product=Plasmodium exported protein (PHISTb), unknown function location=Pf3D7_05_v3:1308278-1309940(+) length=509 sequence_SO=chromosome SO=protein_coding	1	K	HEYAGKQWDDCIKKVKETEDNAKVLLEDIFN	2	......K.....A	motif2	1	VK(1)ETEDNAK	FALSE	VK(68.7)ETEDNAK(-68.7)	2	0.056763	68.7042	0.0207636	77.662	33.893	77.662											1	68.7042	0.0207636	77.662	18248000
PF3D7_0532400	517	517	PF3D7_0532400	lysine-rich membrane-associated PHISTb protein	>PF3D7_0532400 organism=Plasmodium_falciparum_3D7 product=lysine-rich membrane-associated PHISTb protein (LyMP) location=Pf3D7_05_v3:1312471-1314154(+) length=528 sequence_SO=chromosome SO=protein_coding	1	K	KKAGTENKKAGTENTKDKSGKENKKKN____	8	A.....K......	motif8	0.999116	KAGTENTK(0.999)DK	FALSE	K(-33.54)AGTENTK(33.54)DK(-33.54)	2	-0.089609	33.5396	0.0198454	75.229	24.424	75.229											0.999116	33.5396	0.0198454	75.229
PF3D7_0532400	468	468	PF3D7_0532400	lysine-rich membrane-associated PHISTb protein	>PF3D7_0532400 organism=Plasmodium_falciparum_3D7 product=lysine-rich membrane-associated PHISTb protein (LyMP) location=Pf3D7_05_v3:1312471-1314154(+) length=528 sequence_SO=chromosome SO=protein_coding	1	K	KKVRGANKKVGSKNTKVGGENKKAGSSNKKA	3	......K..G...	motif9	1	NTK(1)VGGENKK	FALSE	NTK(72.16)VGGENK(-72.16)K(-84.49)	2	-0.917	72.158	0.00481045	141.88	32.215	141.88											1	72.158	0.00481045	141.88	37792000
PF3D7_0532400	309	309	PF3D7_0532400	lysine-rich membrane-associated PHISTb protein	>PF3D7_0532400 organism=Plasmodium_falciparum_3D7 product=lysine-rich membrane-associated PHISTb protein (LyMP) location=Pf3D7_05_v3:1312471-1314154(+) length=528 sequence_SO=chromosome SO=protein_coding	1	K	EVSKLPKKKKLRNRRKSNPNNEISLRTYGQS	1			1	K(1)SNPNNEISLR	FALSE	K(52.39)SNPNNEISLR	3	0.29947	52.395	0.000184736	122.33	65.151	52.395						1	52.395	0.000929661	91.961	10375000	1	79.492	0.000184736	122.33	19468000
PF3D7_0605900	76	76	PF3D7_0605900	long chain polyunsaturated fatty acid elongation enzyme, putative	>PF3D7_0605900 organism=Plasmodium_falciparum_3D7 product=long chain polyunsaturated fatty acid elongation enzyme, putative location=Pf3D7_06_v3:247640-249166(+) length=293 sequence_SO=chromosome SO=protein_coding	1	K	IKYGSKSRHDKTLAAKIAPAITRSHKSTPLE	5	......K.A....	motif1	1	TLAAK(1)IAPAITR	FALSE	TLAAK(45.28)IAPAITR	2	-0.25565	45.2798	0.00807481	60.364	51.042	45.28																1	45.2798	0.00807481	60.364	2549800
PF3D7_0606900	5	5	PF3D7_0606900	glutaredoxin-like protein	>PF3D7_0606900 organism=Plasmodium_falciparum_3D7 product=glutaredoxin-like protein (GLP2) location=Pf3D7_06_v3:290426-291085(-) length=219 sequence_SO=chromosome SO=protein_coding	1	K	___________MDFIKVEDQRKYIEGNKGYQ	5			1	MDFIK(1)VEDQR	FALSE	MDFIK(40.15)VEDQR	2	-0.44745	40.1539	0.00102724	80.102	68.464	40.154																1	40.1539	0.00102724	80.102	7823000
PF3D7_0607400	124	124	PF3D7_0607400	G-protein associated signal transduction protein, putative	>PF3D7_0607400 organism=Plasmodium_falciparum_3D7 product=G-protein associated signal transduction protein, putative location=Pf3D7_06_v3:306384-309961(-) length=633 sequence_SO=chromosome SO=protein_coding	1	K	MTEKLNEIKYFLESDKINLKEIEMLKTKCLH	7			0.991963	YFLESDK(0.992)INLK(0.008)	FALSE	YFLESDK(20.91)INLK(-20.91)	3	-0.32369	20.9138	0.00204574	79.659	50.153	54.784																0.991963	20.9138	0.00204574	79.659	11552000
PF3D7_0607400	207	207	PF3D7_0607400	G-protein associated signal transduction protein, putative	>PF3D7_0607400 organism=Plasmodium_falciparum_3D7 product=G-protein associated signal transduction protein, putative location=Pf3D7_06_v3:306384-309961(-) length=633 sequence_SO=chromosome SO=protein_coding	1	K	EQLNEKIKSTYLLVQKKRGDNCEKLDFLNFK	8	......K..G...	motif9	0.880056	STYLLVQK(0.88)K(0.12)	FALSE	STYLLVQK(8.66)K(-8.66)	2	-2.4774	8.65531	0.0129197	76.679	52.724	56.258																0.880056	8.65531	0.0129197	76.679	9838400
PF3D7_0608800	369	369	PF3D7_0608800	ornithine aminotransferase	>PF3D7_0608800 organism=Plasmodium_falciparum_3D7 product=ornithine aminotransferase (OAT) location=Pf3D7_06_v3:362635-363879(+) length=414 sequence_SO=chromosome SO=protein_coding	1	K	FKNDLVNVWDICLKFKENGLITRSVHDKTVR	2	......K..G...	motif9	1	FK(1)ENGLITR	FALSE	FK(67.7)ENGLITR	2	1.0819	67.704	0.0118277	85.355	21.09	67.704																1	44.8635	0.0118277	44.863	2870000
PF3D7_0608800	346	346	PF3D7_0608800	ornithine aminotransferase	>PF3D7_0608800 organism=Plasmodium_falciparum_3D7 product=ornithine aminotransferase (OAT) location=Pf3D7_06_v3:362635-363879(+) length=414 sequence_SO=chromosome SO=protein_coding	1	K	KEQLKDSKVVREVRGKGLLCAIEFKNDLVNV	2	.....GK......	motif4	1	GK(1)GLLCAIEFK	FALSE	GK(102.74)GLLCAIEFK(-102.74)	2	-0.74811	102.745	0.00156977	105.65	69.329	105.65																1	88.7205	0.00156977	91.961	27381000
PF3D7_0608800	381	381	PF3D7_0608800	ornithine aminotransferase	>PF3D7_0608800 organism=Plasmodium_falciparum_3D7 product=ornithine aminotransferase (OAT) location=Pf3D7_06_v3:362635-363879(+) length=414 sequence_SO=chromosome SO=protein_coding	1	K	LKFKENGLITRSVHDKTVRLTPPLCITKEQL	5			1	SVHDK(1)TVR	FALSE	SVHDK(123.35)TVR	2	-0.53969	123.355	0.0058113	134.05	95.891	123.35						1	123.355	0.0100916	123.35	61802000	1	85.8618	0.0173728	104.2	20965000	1	134.052	0.0058113	134.05	60615000
PF3D7_0608800	5	5	PF3D7_0608800	ornithine aminotransferase	>PF3D7_0608800 organism=Plasmodium_falciparum_3D7 product=ornithine aminotransferase (OAT) location=Pf3D7_06_v3:362635-363879(+) length=414 sequence_SO=chromosome SO=protein_coding	1	K	___________MDFVKELKSSQDYMNNELTY	5			0.995223	MDFVK(0.995)ELK(0.005)	FALSE	MDFVK(23.19)ELK(-23.19)	2	0.29923	23.1872	0.00620451	66.27	55.442	66.27																0.995223	23.1872	0.00620451	66.27	8329500
PF3D7_0608800	161	161	PF3D7_0608800	ornithine aminotransferase	>PF3D7_0608800 organism=Plasmodium_falciparum_3D7 product=ornithine aminotransferase (OAT) location=Pf3D7_06_v3:362635-363879(+) length=414 sequence_SO=chromosome SO=protein_coding	1	K	NFSGRTLGCVSASTDKKCKNNFGPFVPNFLK	11	..A...K......	motif11	0.920817	TLGCVSASTDK(0.921)K(0.079)	FALSE	TLGCVSASTDK(10.66)K(-10.66)	2	-0.25106	10.6554	0.000480809	85.554	65.895	77.644																0.920817	10.6554	0.000872632	77.644	20684000
PF3D7_0608800	125	125	PF3D7_0608800	ornithine aminotransferase	>PF3D7_0608800 organism=Plasmodium_falciparum_3D7 product=ornithine aminotransferase (OAT) location=Pf3D7_06_v3:362635-363879(+) length=414 sequence_SO=chromosome SO=protein_coding	1	K	NTGAEASETAYKLCRKWGYEVKKIPENSAKI	1	A.....K......	motif8	1	K(1)WGYEVK	FALSE	K(95.68)WGYEVK(-95.68)	2	0.64784	95.6828	0.0309381	101.43	59.778	101.43																1	95.6828	0.0309381	101.43	9977600
PF3D7_0608800	225	225	PF3D7_0608800	ornithine aminotransferase	>PF3D7_0608800 organism=Plasmodium_falciparum_3D7 product=ornithine aminotransferase (OAT) location=Pf3D7_06_v3:362635-363879(+) length=414 sequence_SO=chromosome SO=protein_coding	1	K	VPSDSYFPGVASLCKKYNVLFVADEVQTGLG	1	.A....K......	motif11	1	K(1)YNVLFVADEVQTGLGR	FALSE	K(79.32)YNVLFVADEVQTGLGR	3	-0.22575	79.3174	2.87238e-07	79.317	63.538	79.317																1	79.3174	2.87238e-07	79.317	11000000
PF3D7_0609000	3623	3623	PF3D7_0609000	nucleoporin NUP637, putative	>PF3D7_0609000 organism=Plasmodium_falciparum_3D7 product=conserved Plasmodium protein, unknown function location=Pf3D7_06_v3:370261-388494(+) length=6077 sequence_SO=chromosome SO=protein_coding	1	K	RHTYFTKLLNIENVGKKKNYDKEGIYKNVDI	9	.....GK......	motif4	1	LLNIENVGK(1)	TRUE	LLNIENVGK(77.73)	2	0.91506	77.7321	0.0288848	77.732	9.8348	77.732																1	77.7321	0.0288848	77.732	19276000
PF3D7_0609800	4	4	PF3D7_0609800	palmitoyltransferase DHHC2, putative	>PF3D7_0609800 organism=Plasmodium_falciparum_3D7 product=palmitoyltransferase, putative (DHHC2) location=Pf3D7_06_v3:421157-422622(-) length=284 sequence_SO=chromosome SO=protein_coding	1	K	____________MRPKYVQASQGQKEKKRGG	4			1	MRPK(1)YVQASQGQK	FALSE	MRPK(75.07)YVQASQGQK(-75.07)	3	-0.099137	75.0745	8.2032e-05	78.705	78.705	78.705																1	75.0745	8.2032e-05	78.705	22235000
PF3D7_0609800	95	95	PF3D7_0609800	palmitoyltransferase DHHC2, putative	>PF3D7_0609800 organism=Plasmodium_falciparum_3D7 product=palmitoyltransferase, putative (DHHC2) location=Pf3D7_06_v3:421157-422622(-) length=284 sequence_SO=chromosome SO=protein_coding	1	K	GKVPRNWGFYVGDDVKRRRYCKICNVWKPDR	11			1	NWGFYVGDDVK(1)R	FALSE	NWGFYVGDDVK(62.09)R	2	0.66627	62.0879	0.000182628	99.5	82.838	62.088																1	62.0879	0.000182628	99.5	15665000
PF3D7_0609800	13	13	PF3D7_0609800	palmitoyltransferase DHHC2, putative	>PF3D7_0609800 organism=Plasmodium_falciparum_3D7 product=palmitoyltransferase, putative (DHHC2) location=Pf3D7_06_v3:421157-422622(-) length=284 sequence_SO=chromosome SO=protein_coding	1	K	___MRPKYVQASQGQKEKKRGGSLFIFIVFF	9	.A....K......	motif11	0.998618	YVQASQGQK(0.999)EK(0.001)	FALSE	YVQASQGQK(28.59)EK(-28.59)	3	-0.083617	28.5894	0.000243495	129.88	95.075	84.31																0.998618	28.5894	0.000243495	129.88	18187000
PF3D7_0609800	101	101	PF3D7_0609800	palmitoyltransferase DHHC2, putative	>PF3D7_0609800 organism=Plasmodium_falciparum_3D7 product=palmitoyltransferase, putative (DHHC2) location=Pf3D7_06_v3:421157-422622(-) length=284 sequence_SO=chromosome SO=protein_coding	1	K	WGFYVGDDVKRRRYCKICNVWKPDRTHHCSA	3			0.994661	YCK(0.995)ICNVWK(0.005)PDR	FALSE	YCK(22.7)ICNVWK(-22.7)PDR	3	-1.1925	22.702	0.00332033	45.28	37.669	45.28																0.994661	22.702	0.00332033	45.28	4543000
PF3D7_0610400	28	28	PF3D7_0610400	histone H3	>PF3D7_0610400 organism=Plasmodium_falciparum_3D7 product=histone H3 (H3) location=Pf3D7_06_v3:444747-445157(+) length=136 sequence_SO=chromosome SO=protein_coding	1	K	AGKAPRKQLASKAARKSAPISAGIKKPHRYR	1	......K.A....	motif1	1	K(1)SAPISAGIK	FALSE	K(125.31)SAPISAGIK(-125.31)	2	-0.062695	125.306	0.000534528	148.28	75.673	130.01	1	87.755	0.00230606	93.839	44948000	1	125.306	0.000534528	130.01	238630000	1	109.489	0.000598891	148.28	347700000	1	101.211	0.00125961	111.86	354660000
PF3D7_0610400	57	57	PF3D7_0610400	histone H3	>PF3D7_0610400 organism=Plasmodium_falciparum_3D7 product=histone H3 (H3) location=Pf3D7_06_v3:444747-445157(+) length=136 sequence_SO=chromosome SO=protein_coding	1	K	YRPGTVALREIRRYQKSTDLLIRKLPFQRLV	3			1	YQK(1)STDLLIR	FALSE	YQK(55.31)STDLLIR	2	0.62479	55.3143	0.00779863	55.314	29.841	55.314						1	43.5023	0.0149643	43.502	7098800						1	55.3143	0.00779863	55.314	31483000
PF3D7_0610400	37	37	PF3D7_0610400	histone H3	>PF3D7_0610400 organism=Plasmodium_falciparum_3D7 product=histone H3 (H3) location=Pf3D7_06_v3:444747-445157(+) length=136 sequence_SO=chromosome SO=protein_coding	1	K	ASKAARKSAPISAGIKKPHRYRPGTVALREI	9			0.837947	SAPISAGIK(0.838)K(0.162)PHR	FALSE	SAPISAGIK(7.14)K(-7.14)PHR	3	-0.18904	7.13561	0.000574535	59.116	40.444	50.897																0.837947	7.13561	0.000574535	59.116	37611000
PF3D7_0610400;PF3D7_0617900		24	PF3D7_0610400	histone H3	>PF3D7_0610400 organism=Plasmodium_falciparum_3D7 product=histone H3 (H3) location=Pf3D7_06_v3:444747-445157(+) length=136 sequence_SO=chromosome SO=protein_coding;>PF3D7_0617900 organism=Plasmodium_falciparum_3D7 product=histone H3 variant, putative (H3.	1	K	RKSTAGKAPRKQLASKAARKSAPISAGIKKP;RKSTGGKAPRKQLASKAARKSAPVSTGIKKP	5	......K.A....	motif1	1	QLASK(1)AAR	FALSE	QLASK(110.12)AAR	2	2.3968	110.12	0.00246047	143.03	44.037	110.12						1	110.12	0.0153219	110.12	28088000	1	98.6294	0.00261415	143.03	145080000	1	80.2187	0.00246047	123.21	152010000
PF3D7_0610400;PF3D7_0617900;tr|K7EK07|K7EK07_HUMAN;sp|Q6NXT2|H3C_HUMAN;sp|Q71DI3|H32_HUMAN;sp|Q16695|H31T_HUMAN;sp|P84243|H33_HUMAN;sp|P68431|H31_HUMAN		123	PF3D7_0610400	histone H3	>PF3D7_0610400 organism=Plasmodium_falciparum_3D7 product=histone H3 (H3) location=Pf3D7_06_v3:444747-445157(+) length=136 sequence_SO=chromosome SO=protein_coding;>PF3D7_0617900 organism=Plasmodium_falciparum_3D7 product=histone H3 variant, putative (H3.	1	K	TNLCAIHAKRVTIMPKDIQLARRIRGERS__	6			1	VTIMPK(1)DIQLAR	FALSE	VTIMPK(48.95)DIQLAR	3	-1.3549	48.9483	0.000382673	73.927	73.927	48.948																1	48.9483	0.000382673	73.927	17755000
PF3D7_0613100	78	78	PF3D7_0613100	conserved Plasmodium protein, unknown function	>PF3D7_0613100 organism=Plasmodium_falciparum_3D7 product=conserved Plasmodium protein, unknown function location=Pf3D7_06_v3:537778-538585(+) length=78 sequence_SO=chromosome SO=protein_coding	1	K	KDSLLYSKINASSNTK_______________	8			1	INASSNTK(1)	TRUE	INASSNTK(80.17)	2	0.6869	80.1654	0.0150425	174.52	129.15	80.165						1	80.1654	0.0151015	80.165		1	160.63	0.0159284	174.52	103860000	1	121.58	0.0150425	146.03	25844000
PF3D7_0613300	471	471	PF3D7_0613300	rhoptry protein ROP14	>PF3D7_0613300 organism=Plasmodium_falciparum_3D7 product=rhoptry protein ROP14 (ROP14) location=Pf3D7_06_v3:540077-544798(-) length=1422 sequence_SO=chromosome SO=protein_coding	1	K	YQITKEQIHNNQSPQKQKEQQQQYRALIPKS	11			0.998182	EQIHNNQSPQK(0.998)QK(0.002)	FALSE	EQIHNNQSPQK(27.4)QK(-27.4)	3	-0.018575	27.3962	5.67718e-05	84.352	65.446	84.352																0.998182	27.3962	5.67718e-05	84.352	24197000
PF3D7_0613700	402	402	PF3D7_0613700	syntaxin-binding protein, putative	>PF3D7_0613700 organism=Plasmodium_falciparum_3D7 product=syntaxin binding protein, putative location=Pf3D7_06_v3:559349-561460(-) length=703 sequence_SO=chromosome SO=protein_coding	2	K	EISAFTEKNAVVKIQKKNVLNPTEALDALRS	8	A.....K......	motif8	0.991506	NAVVK(1)IQK(0.992)K(0.009)	FALSE	NAVVK(42.48)IQK(20.72)K(-20.72)	2	-0.18094	20.723	0.0136803	44.753	8.3716	44.753																0.991506	20.723	0.0136803	44.753
PF3D7_0613700	399	399	PF3D7_0613700	syntaxin-binding protein, putative	>PF3D7_0613700 organism=Plasmodium_falciparum_3D7 product=syntaxin binding protein, putative location=Pf3D7_06_v3:559349-561460(-) length=703 sequence_SO=chromosome SO=protein_coding	2	K	IKNEISAFTEKNAVVKIQKKNVLNPTEALDA	5	......K.Q....	motif7	0.999911	NAVVK(1)IQK(0.992)K(0.009)	FALSE	NAVVK(42.48)IQK(20.72)K(-20.72)	2	-0.18094	42.4811	0.0136803	44.753	8.3716	44.753																0.999911	42.4811	0.0136803	44.753
PF3D7_0613900	2139	2139	PF3D7_0613900	myosin E, putative	>PF3D7_0613900 organism=Plasmodium_falciparum_3D7 product=myosin E, putative (myoE) location=Pf3D7_06_v3:579435-585896(-) length=2153 sequence_SO=chromosome SO=protein_coding	1	K	VNIVKNKYLRMTAQNKNKKYNILVFKTPAL_	6			0.952625	MTAQNK(0.953)NK(0.047)K	FALSE	MTAQNK(13.06)NK(-13.06)K(-34.84)	2	0.20459	13.0625	0.00823196	145.9	78.627	145.9																0.952625	13.0625	0.00823196	145.9	54630000
PF3D7_0613900	2013	2013	PF3D7_0613900	myosin E, putative	>PF3D7_0613900 organism=Plasmodium_falciparum_3D7 product=myosin E, putative (myoE) location=Pf3D7_06_v3:579435-585896(-) length=2153 sequence_SO=chromosome SO=protein_coding	1	K	VHEICISNNIHKNFIKNNYKIMCFQPTKISY	4			0.999723	NFIK(1)NNYK	FALSE	NFIK(35.57)NNYK(-35.57)	2	-0.077387	35.5748	0.00501455	143	47.047	143																0.999723	35.5748	0.00501455	143	32546000
PF3D7_0613900	1814	1814	PF3D7_0613900	myosin E, putative	>PF3D7_0613900 organism=Plasmodium_falciparum_3D7 product=myosin E, putative (myoE) location=Pf3D7_06_v3:579435-585896(-) length=2153 sequence_SO=chromosome SO=protein_coding	1	K	YIDFDFSCVKAITLNKLGNMNELSCYKNDEN	6	.A....K......	motif11	0.999937	AITLNK(1)LGNMNELSCYK	FALSE	AITLNK(42)LGNMNELSCYK(-42)	3	-1.4573	42.0006	0.000102674	52.862	45.079	52.862																0.999937	42.0006	0.000102674	52.862	19877000
PF3D7_0613900	1200	1200	PF3D7_0613900	myosin E, putative	>PF3D7_0613900 organism=Plasmodium_falciparum_3D7 product=myosin E, putative (myoE) location=Pf3D7_06_v3:579435-585896(-) length=2153 sequence_SO=chromosome SO=protein_coding	1	K	INFYKKGLKELNNAIKNFNPINGKLKKDKFF	7	....A.K......	motif10	0.984221	ELNNAIK(0.984)NFNPINGK(0.016)	FALSE	ELNNAIK(17.95)NFNPINGK(-17.95)	3	0.73413	17.9503	0.00311019	40.941	29.827	40.941																0.984221	17.9503	0.00311019	40.941
PF3D7_0613900	1208	1208	PF3D7_0613900	myosin E, putative	>PF3D7_0613900 organism=Plasmodium_falciparum_3D7 product=myosin E, putative (myoE) location=Pf3D7_06_v3:579435-585896(-) length=2153 sequence_SO=chromosome SO=protein_coding	1	K	KELNNAIKNFNPINGKLKKDKFFNMGIQNFY	8	.....GK......	motif4	0.858288	NFNPINGK(0.858)LK(0.142)	FALSE	NFNPINGK(7.82)LK(-7.82)	2	-0.229	7.82242	0.00929553	96.342	58.039	82.287																0.858288	7.82242	0.00929553	96.342	2216200
PF3D7_0613900	1193	1193	PF3D7_0613900	myosin E, putative	>PF3D7_0613900 organism=Plasmodium_falciparum_3D7 product=myosin E, putative (myoE) location=Pf3D7_06_v3:579435-585896(-) length=2153 sequence_SO=chromosome SO=protein_coding	1	K	VMNFFNNINFYKKGLKELNNAIKNFNPINGK	3			0.999998	GLK(1)ELNNAIK	FALSE	GLK(57.18)ELNNAIK(-57.18)	2	-0.88327	57.1775	0.00747248	85.355	44.631	85.355																0.999998	57.1775	0.00747248	85.355	5138700
PF3D7_0613900	2039	2039	PF3D7_0613900	myosin E, putative	>PF3D7_0613900 organism=Plasmodium_falciparum_3D7 product=myosin E, putative (myoE) location=Pf3D7_06_v3:579435-585896(-) length=2153 sequence_SO=chromosome SO=protein_coding	1	K	TKISYKDFLKSKLFYKSINYTNFQTRNITQV	4			1	LFYK(1)SINYTNFQTR	FALSE	LFYK(40.94)SINYTNFQTR	3	0.33168	40.9413	0.00313053	40.941	32.6	40.941																1	40.9413	0.00313053	40.941	5122400
PF3D7_0614300	466	466	PF3D7_0614300	major facilitator superfamily-related transporter, putative	>PF3D7_0614300 organism=Plasmodium_falciparum_3D7 product=organic anion transporter location=Pf3D7_06_v3:597484-600517(-) length=853 sequence_SO=chromosome SO=protein_coding	1	K	YSDHKLYNENFKLNKKSNMVAAIYEEDAVFR	1	......K.....A	motif2	1	K(1)SNMVAAIYEEDAVFR	FALSE	K(81.66)SNMVAAIYEEDAVFR	3	-0.26718	81.6559	3.62746e-09	120.63	98.961	81.656																1	81.6559	3.62746e-09	120.63	40617000
PF3D7_0614300	462	462	PF3D7_0614300	major facilitator superfamily-related transporter, putative	>PF3D7_0614300 organism=Plasmodium_falciparum_3D7 product=organic anion transporter location=Pf3D7_06_v3:597484-600517(-) length=853 sequence_SO=chromosome SO=protein_coding	1	K	NSTDYSDHKLYNENFKLNKKSNMVAAIYEED	7			0.959002	LYNENFK(0.959)LNK(0.034)K(0.007)	FALSE	LYNENFK(14.54)LNK(-14.54)K(-21.18)	3	0.47631	14.5436	0.000758797	82.261	43.693	45.433																0.959002	14.5436	0.0133823	45.433	4521100
PF3D7_0614300	277	277	PF3D7_0614300	major facilitator superfamily-related transporter, putative	>PF3D7_0614300 organism=Plasmodium_falciparum_3D7 product=organic anion transporter location=Pf3D7_06_v3:597484-600517(-) length=853 sequence_SO=chromosome SO=protein_coding	1	K	FYLFDENLLKTYEDEKSRRELEESQPQKCLE	6			1	TYEDEK(1)SRR	FALSE	TYEDEK(52.58)SRR	3	-0.078408	52.5786	0.0196023	52.579	28.549	52.579																1	52.5786	0.0196023	52.579	5701200
PF3D7_0614500	125	125	PF3D7_0614500	60S ribosomal protein L19	>PF3D7_0614500 organism=Plasmodium_falciparum_3D7 product=60S ribosomal protein L19 (RPL19) location=Pf3D7_06_v3:606142-607259(-) length=182 sequence_SO=chromosome SO=protein_coding	1	K	DSKKVDRHLYHSFYLKCKGNQFKNKRTLIEA	9	......K..G...	motif9	0.992872	HLYHSFYLK(0.993)CK(0.007)	FALSE	HLYHSFYLK(21.44)CK(-21.44)	3	-0.44748	21.4391	0.000158852	99.973	85.182	52.725						0.992872	21.4391	0.0183168	52.725	8708400						0.992277	21.0884	0.000158852	99.973	39326000
PF3D7_0614500	152	152	PF3D7_0614500	60S ribosomal protein L19	>PF3D7_0614500 organism=Plasmodium_falciparum_3D7 product=60S ribosomal protein L19 (RPL19) location=Pf3D7_06_v3:606142-607259(-) length=182 sequence_SO=chromosome SO=protein_coding	1	K	LIEAIQREKNETLKKKAIADQLEAKRLKAQV	1	......KA.....	motif3	1	K(1)AIADQLEAK	FALSE	K(146.99)AIADQLEAK(-146.99)	2	0.089719	146.994	7.34596e-07	169.65	73.48	151.79						1	146.994	7.35E-07	169.65	44804000
PF3D7_0617200	224	224	PF3D7_0617200	conserved protein, unknown function	>PF3D7_0617200 organism=Plasmodium_falciparum_3D7 product=conserved Plasmodium protein, unknown function location=Pf3D7_06_v3:717050-718917(+) length=446 sequence_SO=chromosome SO=protein_coding	1	K	NKLNELNNLRDNYSKKMNHYFMERRSITVEM	1			1	K(1)MNHYFMER	FALSE	K(58.7)MNHYFMER	3	-0.41272	58.6986	0.00533753	59.067	46.799	58.699																1	58.6986	0.00533753	59.067	29386000
PF3D7_0617200	257	257	PF3D7_0617200	conserved protein, unknown function	>PF3D7_0617200 organism=Plasmodium_falciparum_3D7 product=conserved Plasmodium protein, unknown function location=Pf3D7_06_v3:717050-718917(+) length=446 sequence_SO=chromosome SO=protein_coding	1	K	KKQQYRSFKLNQLQAKQQKIKEDRERKNLEL	7	.....AK......	motif5	0.997897	LNQLQAK(0.998)QQK(0.002)	FALSE	LNQLQAK(26.76)QQK(-26.76)	2	0.59708	26.7616	0.00749555	95.608	33.916	95.608																0.997897	26.7616	0.00749555	95.608
PF3D7_0617200	250	250	PF3D7_0617200	conserved protein, unknown function	>PF3D7_0617200 organism=Plasmodium_falciparum_3D7 product=conserved Plasmodium protein, unknown function location=Pf3D7_06_v3:717050-718917(+) length=446 sequence_SO=chromosome SO=protein_coding	1	K	ITVEMEEKKQQYRSFKLNQLQAKQQKIKEDR	3	......K.....A	motif2	0.999997	SFK(1)LNQLQAK	FALSE	SFK(55.82)LNQLQAK(-55.82)	2	-0.78382	55.8195	0.0121761	77.192	48.987	77.192																0.999997	55.8195	0.0121761	77.192	7597500
PF3D7_0617800	21	21	PF3D7_0617800	histone H2A	>PF3D7_0617800 organism=Plasmodium_falciparum_3D7 product=histone H2A (H2A) location=Pf3D7_06_v3:748416-748814(-) length=132 sequence_SO=chromosome SO=protein_coding	1	K	KTGRKKASKGTSNSAKAGLQFPVGRIGRYLK	7	......KA.....	motif3	1	GTSNSAK(1)AGLQFPVGR	FALSE	GTSNSAK(57.27)AGLQFPVGR	3	-0.031154	57.2674	3.15552e-07	92.939	80.308	57.267						1	57.2674	3.25E-06	74.853	36575000	1	64.2439	3.15552e-07	70.373	35376000	1	54.8978	8.34852e-07	92.939	47869000
PF3D7_0617800	124	124	PF3D7_0617800	histone H2A	>PF3D7_0617800 organism=Plasmodium_falciparum_3D7 product=histone H2A (H2A) location=Pf3D7_06_v3:748416-748814(-) length=132 sequence_SO=chromosome SO=protein_coding	1	K	LPNIHNVLLPKKSQLKAGTANQDY_______	4	......KA.....	motif3	1	SQLK(1)AGTANQDY	FALSE	SQLK(46.88)AGTANQDY	2	0.34057	46.8795	1.8238e-09	171.95	152.32	46.88	0.986401	18.6054	0.0273976	54.898	4644600	0.991357	20.5959	0.00180098	86.405	27393000	1	46.8795	0.000839962	110.92	56156000	1	83.2035	1.8238e-09	171.95	170010000
PF3D7_0617800	11	11	PF3D7_0617800	histone H2A	>PF3D7_0617800 organism=Plasmodium_falciparum_3D7 product=histone H2A (H2A) location=Pf3D7_06_v3:748416-748814(-) length=132 sequence_SO=chromosome SO=protein_coding	1	K	_____MSAKGKTGRKKASKGTSNSAKAGLQF	1	......KA.....	motif3	0.77484	K(0.775)ASK(0.225)GTSNSAK	FALSE	K(5.37)ASK(-5.37)GTSNSAK(-51.88)	3	0.41258	5.3673	0.00517388	55.721	19.403	55.721																0.77484	5.3673	0.00517388	55.721	7576000
PF3D7_0617800	14	14	PF3D7_0617800	histone H2A	>PF3D7_0617800 organism=Plasmodium_falciparum_3D7 product=histone H2A (H2A) location=Pf3D7_06_v3:748416-748814(-) length=132 sequence_SO=chromosome SO=protein_coding	1	K	__MSAKGKTGRKKASKGTSNSAKAGLQFPVG	3	......K.....A	motif2	1	ASK(1)GTSNSAK	FALSE	ASK(72.38)GTSNSAK(-72.38)	2	0.94915	72.3803	0.00202451	140.01	87.751	110.08						0.999999	59.6444	0.00947606	81.017	12134000	1	72.3803	0.00209926	110.08	15707000	1	71.2584	0.00202451	140.01	53520000
PF3D7_0617800	96	96	PF3D7_0617800	histone H2A	>PF3D7_0617800 organism=Plasmodium_falciparum_3D7 product=histone H2A (H2A) location=Pf3D7_06_v3:748416-748814(-) length=132 sequence_SO=chromosome SO=protein_coding	1	K	PRHIQLAVRNDEELNKFLAGVTFASGGVLPN	7	......K..A...	motif6	0.999998	NDEELNK(1)FLAGVTFASGGVLPNIHNVLLPK	FALSE	NDEELNK(56.54)FLAGVTFASGGVLPNIHNVLLPK(-56.54)	3	0.78981	56.5436	3.27469e-12	65.171	63.714	65.171						0.999998	56.5436	3.27E-12	65.171							0.999811	37.2459	5.68524e-05	40.044	35001000
PF3D7_0617900	28	28	PF3D7_0617900	histone H3 variant	>PF3D7_0617900 organism=Plasmodium_falciparum_3D7 product=histone H3 variant, putative (H3.3) location=Pf3D7_06_v3:754395-754805(+) length=136 sequence_SO=chromosome SO=protein_coding	1	K	GGKAPRKQLASKAARKSAPVSTGIKKPHRYR	1	......K.A....	motif1	1	K(1)SAPVSTGIK	FALSE	K(118.63)SAPVSTGIK(-118.63)	2	0.26398	118.634	0.00111357	120.77	64.339	120.77	1	76.7362	0.00544561	81.625	14037000	1	118.634	0.00111357	120.77	95638000	1	111.36	0.00111357	120.77	177060000	1	104.076	0.00124324	110.08	262690000
PF3D7_0617900	57	57	PF3D7_0617900	histone H3 variant	>PF3D7_0617900 organism=Plasmodium_falciparum_3D7 product=histone H3 variant, putative (H3.3) location=Pf3D7_06_v3:754395-754805(+) length=136 sequence_SO=chromosome SO=protein_coding	1	K	YRPGTVALREIRKFQKSTDLLIRKLPFQRLV	3			1	FQK(1)STDLLIR	FALSE	FQK(57.79)STDLLIR	3	0.37444	57.785	0.00208968	68.536	35.447	57.785																1	57.785	0.00208968	68.536	9995800
PF3D7_0617900	80	80	PF3D7_0617900	histone H3 variant	>PF3D7_0617900 organism=Plasmodium_falciparum_3D7 product=histone H3 variant, putative (H3.3) location=Pf3D7_06_v3:754395-754805(+) length=136 sequence_SO=chromosome SO=protein_coding	1	K	KLPFQRLVREIAQEYKTDLRFQSQAVLALQE	7	..A...K......	motif11	1	EIAQEYK(1)TDLR	FALSE	EIAQEYK(63.4)TDLR	2	-1.4678	63.4012	0.00504723	75.819	52.702	63.401																1	63.4012	0.00504723	75.819	17835000
PF3D7_0618000	358	358	PF3D7_0618000	conserved Plasmodium membrane protein, unknown function	>PF3D7_0618000 organism=Plasmodium_falciparum_3D7 product=conserved Plasmodium membrane protein, unknown function location=Pf3D7_06_v3:758609-760996(+) length=795 sequence_SO=chromosome SO=protein_coding	1	K	NNNNNNNNNTNLDREKVMNLINKYNNIKKKN	2			1	EK(1)VMNLINK	FALSE	EK(112.07)VMNLINK(-112.07)	2	0.2204	112.073	0.00257185	126.07	42.861	126.07																1	112.073	0.00257185	126.07	41849000
PF3D7_0618000	463	463	PF3D7_0618000	conserved Plasmodium membrane protein, unknown function	>PF3D7_0618000 organism=Plasmodium_falciparum_3D7 product=conserved Plasmodium membrane protein, unknown function location=Pf3D7_06_v3:758609-760996(+) length=795 sequence_SO=chromosome SO=protein_coding	1	K	IKTNDDEKKKTCYPDKNEKKTYSFEKIKSFV	6			0.991447	TCYPDK(0.991)NEK(0.009)	FALSE	TCYPDK(20.64)NEK(-20.64)	2	0.32487	20.6416	0.00366593	113.74	83.551	113.74																0.991447	20.6416	0.00480469	113.74	133010000
PF3D7_0618000	466	466	PF3D7_0618000	conserved Plasmodium membrane protein, unknown function	>PF3D7_0618000 organism=Plasmodium_falciparum_3D7 product=conserved Plasmodium membrane protein, unknown function location=Pf3D7_06_v3:758609-760996(+) length=795 sequence_SO=chromosome SO=protein_coding	1	K	NDDEKKKTCYPDKNEKKTYSFEKIKSFVSNN	9			0.998591	TCYPDKNEK(0.999)K(0.001)	FALSE	TCYPDK(-47)NEK(28.57)K(-28.57)	2	-0.19246	28.5675	3.74455e-06	169.65	96.726	157.38											0.987972	20.9621	0.00616674	106.4	20231000	0.998591	28.5675	0.000720932	157.38	228740000
PF3D7_0618000	441	441	PF3D7_0618000	conserved Plasmodium membrane protein, unknown function	>PF3D7_0618000 organism=Plasmodium_falciparum_3D7 product=conserved Plasmodium membrane protein, unknown function location=Pf3D7_06_v3:758609-760996(+) length=795 sequence_SO=chromosome SO=protein_coding	1	K	IFEFQKEHMNDINYPKNISQITIKTNDDEKK	10			0.999366	EHMNDINYPK(0.999)NISQITIK(0.001)	FALSE	EHMNDINYPK(31.98)NISQITIK(-31.98)	3	-0.35364	31.9781	3.6758e-10	99.663	99.663	99.663																0.999366	31.9781	3.6758e-10	99.663	19452000
PF3D7_0618000	365	365	PF3D7_0618000	conserved Plasmodium membrane protein, unknown function	>PF3D7_0618000 organism=Plasmodium_falciparum_3D7 product=conserved Plasmodium membrane protein, unknown function location=Pf3D7_06_v3:758609-760996(+) length=795 sequence_SO=chromosome SO=protein_coding	1	K	NNTNLDREKVMNLINKYNNIKKKNSEQNTIY	7			0.999877	VMNLINK(1)YNNIK	FALSE	VMNLINK(39.1)YNNIK(-39.1)	3	-0.42275	39.1045	3.35e-05	140.49	140.49	140.49																0.999877	39.1045	3.35e-05	140.49	28056000
PF3D7_0618000	457	457	PF3D7_0618000	conserved Plasmodium membrane protein, unknown function	>PF3D7_0618000 organism=Plasmodium_falciparum_3D7 product=conserved Plasmodium membrane protein, unknown function location=Pf3D7_06_v3:758609-760996(+) length=795 sequence_SO=chromosome SO=protein_coding	1	K	NISQITIKTNDDEKKKTCYPDKNEKKTYSFE	1			1	K(1)TCYPDKNEK	FALSE	K(130.52)TCYPDK(-130.52)NEK(-138.69)	2	-0.62168	130.524	4.26895e-06	168.22	120.13	168.22																1	130.524	4.26895e-06	168.22	138390000
PF3D7_0618000	467	467	PF3D7_0618000	conserved Plasmodium membrane protein, unknown function	>PF3D7_0618000 organism=Plasmodium_falciparum_3D7 product=conserved Plasmodium membrane protein, unknown function location=Pf3D7_06_v3:758609-760996(+) length=795 sequence_SO=chromosome SO=protein_coding	1	K	DDEKKKTCYPDKNEKKTYSFEKIKSFVSNNT	1			1	K(1)TYSFEK	FALSE	K(94.11)TYSFEK(-94.11)	2	0.27446	94.111	0.00397443	96.948	51.268	96.948											0.540604	0.890259	0.0209388	45.433	21791000	1	94.111	0.00397443	96.948	184010000
PF3D7_0618000	398	398	PF3D7_0618000	conserved Plasmodium membrane protein, unknown function	>PF3D7_0618000 organism=Plasmodium_falciparum_3D7 product=conserved Plasmodium membrane protein, unknown function location=Pf3D7_06_v3:758609-760996(+) length=795 sequence_SO=chromosome SO=protein_coding	1	K	SSITNTIKTSEYDVEKNDLNIQNDENICSRE	8			1	TSEYDVEK(1)NDLNIQNDENICSR	FALSE	TSEYDVEK(58.71)NDLNIQNDENICSR	3	-0.25155	58.7117	4.45385e-07	58.712	54.908	58.712																1	58.7117	4.45385e-07	58.712	14327000
PF3D7_0618000	449	449	PF3D7_0618000	conserved Plasmodium membrane protein, unknown function	>PF3D7_0618000 organism=Plasmodium_falciparum_3D7 product=conserved Plasmodium membrane protein, unknown function location=Pf3D7_06_v3:758609-760996(+) length=795 sequence_SO=chromosome SO=protein_coding	1	K	MNDINYPKNISQITIKTNDDEKKKTCYPDKN	8			0.988927	NISQITIK(0.989)TNDDEK(0.007)K(0.002)K(0.002)	FALSE	NISQITIK(21.3)TNDDEK(-21.3)K(-27.52)K(-26.97)	3	-0.26811	21.297	0.024188	59.673	50.103	59.673																0.988927	21.297	0.024188	59.673	7020800
PF3D7_0618000	210	210	PF3D7_0618000	conserved Plasmodium membrane protein, unknown function	>PF3D7_0618000 organism=Plasmodium_falciparum_3D7 product=conserved Plasmodium membrane protein, unknown function location=Pf3D7_06_v3:758609-760996(+) length=795 sequence_SO=chromosome SO=protein_coding	1	K	DEEHCNNIGKRKAKRKSYNNNNNNYYTYKHH	2			0.931916	RK(0.932)SYNNNNNNYYTYK(0.068)	FALSE	RK(11.94)SYNNNNNNYYTYK(-11.94)	3	-3.4346	11.9417	0.00250948	45.207	27.742	45.207																0.931916	11.9417	0.00250948	45.207	12731000
PF3D7_0618000	485	485	PF3D7_0618000	conserved Plasmodium membrane protein, unknown function	>PF3D7_0618000 organism=Plasmodium_falciparum_3D7 product=conserved Plasmodium membrane protein, unknown function location=Pf3D7_06_v3:758609-760996(+) length=795 sequence_SO=chromosome SO=protein_coding	1	K	SFEKIKSFVSNNTYLKDKKSLILEKKSQISK	10			0.904929	SFVSNNTYLK(0.905)DK(0.044)K(0.051)	FALSE	SFVSNNTYLK(12.47)DK(-13.14)K(-12.47)	3	0.059056	12.4743	0.00444278	50.088	31.256	50.088																0.904929	12.4743	0.00444278	50.088	7022600
PF3D7_0618300	125	125	PF3D7_0618300	60S ribosomal protein L27a, putative	>PF3D7_0618300 organism=Plasmodium_falciparum_3D7 product=60S ribosomal protein L27a, putative location=Pf3D7_06_v3:768792-769456(+) length=148 sequence_SO=chromosome SO=protein_coding	1	K	VLGNGKLKHNQPIVVKARYFSSVAEKKIKAV	10	......KA.....	motif3	1	LKHNQPIVVK(1)AR	FALSE	LK(-79.47)HNQPIVVK(79.47)AR	3	-0.0093316	79.4673	0.000222399	100.25	79.545	83.045						1	85.8073	0.000466782	99.013	126210000	1	81.525	0.000254931	100.02	30948000	1	79.4673	0.000222399	100.25	78006000
PF3D7_0618300	117	117	PF3D7_0618300	60S ribosomal protein L27a, putative	>PF3D7_0618300 organism=Plasmodium_falciparum_3D7 product=60S ribosomal protein L27a, putative location=Pf3D7_06_v3:768792-769456(+) length=148 sequence_SO=chromosome SO=protein_coding	1	K	VTRKGYFKVLGNGKLKHNQPIVVKARYFSSV	2			1	LK(1)HNQPIVVK	FALSE	LK(118.44)HNQPIVVK(-118.44)	2	0.72583	118.443	7.90038e-07	173.37	116.82	127.76						1	118.443	0.00106371	135.43	133860000	1	66.3523	0.00147263	71.451	41478000	1	164.049	7.90038e-07	173.37	389750000
PF3D7_0618300	135	135	PF3D7_0618300	60S ribosomal protein L27a, putative	>PF3D7_0618300 organism=Plasmodium_falciparum_3D7 product=60S ribosomal protein L27a, putative location=Pf3D7_06_v3:768792-769456(+) length=148 sequence_SO=chromosome SO=protein_coding	1	K	QPIVVKARYFSSVAEKKIKAVGGQCILVA__	8	....A.K......	motif10	0.940337	YFSSVAEK(0.94)K(0.06)	FALSE	YFSSVAEK(11.98)K(-11.98)	2	1.0092	11.9758	0.0028512	113.62	74.317	113.62						0.908276	9.95733	0.00760999	90.15	77796000	0.940337	11.9758	0.0028512	113.62	19410000	0.933826	11.4958	0.00426359	101.65	164750000
PF3D7_0619000.1;PF3D7_0619000.2		946	PF3D7_0619000.1	conserved protein, unknown function	>PF3D7_0619000.1 organism=Plasmodium_falciparum_3D7 product=conserved Plasmodium protein, unknown function location=Pf3D7_06_v3:788707-796025(-) length=1796 sequence_SO=chromosome SO=protein_coding;>PF3D7_0619000.2 organism=Plasmodium_falciparum_3D7 produ	1	K	KEEEASYLNLINKYYKNMVTKILPCSKENGK	3			1	YYK(1)NMVTK	FALSE	YYK(72.6)NMVTK(-72.6)	2	-0.25009	72.6023	0.0136834	116.37	80.934	116.37																1	72.6023	0.0136834	116.37	28762000
PF3D7_0619400	339	339	PF3D7_0619400	cell division cycle protein 48 homologue, putative	>PF3D7_0619400 organism=Plasmodium_falciparum_3D7 product=cell division cycle protein 48 homologue, putative location=Pf3D7_06_v3:815622-818247(-) length=828 sequence_SO=chromosome SO=protein_coding	1	K	ERRVVSQLLTLMDGIKSRGQVVVIAATNRQN	14	......K..G...	motif9	1	RVVSQLLTLMDGIK(1)SR	FALSE	RVVSQLLTLMDGIK(50.19)SR	3	0.65277	50.1885	0.000688775	50.188	39.143	50.188																1	50.1885	0.000688775	50.188	2004500
PF3D7_0619400	115	115	PF3D7_0619400	cell division cycle protein 48 homologue, putative	>PF3D7_0619400 organism=Plasmodium_falciparum_3D7 product=cell division cycle protein 48 homologue, putative location=Pf3D7_06_v3:815622-818247(-) length=828 sequence_SO=chromosome SO=protein_coding	1	K	GDVVYVKSCPEIPYGKKIQVLPIDDTIEGLA	9	.....GK......	motif4	0.875285	SCPEIPYGK(0.875)K(0.125)	FALSE	SCPEIPYGK(8.46)K(-8.46)	3	-0.0043316	8.4623	0.00327881	68.626	57.032	59.908						0.724714	4.20383	0.0486478	45.908	5742800						0.875285	8.4623	0.00327881	59.908
PF3D7_0619400	716	716	PF3D7_0619400	cell division cycle protein 48 homologue, putative	>PF3D7_0619400 organism=Plasmodium_falciparum_3D7 product=cell division cycle protein 48 homologue, putative location=Pf3D7_06_v3:815622-818247(-) length=828 sequence_SO=chromosome SO=protein_coding	1	K	AIRDAIDAEEMNKKSKLELSNKKENEQNETN	2			1	SK(1)LELSNKK	FALSE	SK(79.43)LELSNK(-79.43)K(-90.88)	2	0.18289	79.4343	0.0290098	96.665	8.4881	96.665																1	79.4343	0.0290098	96.665	11744000
PF3D7_0619400	7	7	PF3D7_0619400	cell division cycle protein 48 homologue, putative	>PF3D7_0619400 organism=Plasmodium_falciparum_3D7 product=cell division cycle protein 48 homologue, putative location=Pf3D7_06_v3:815622-818247(-) length=828 sequence_SO=chromosome SO=protein_coding	1	K	_________MEDNTDKKALVDENNGENKVPK	7	......K.A....	motif1	0.965952	MEDNTDK(0.966)K(0.034)	FALSE	MEDNTDK(14.53)K(-14.53)	2	0.87717	14.5286	0.00543933	104.44	73.133	82.426											0.590415	1.58813	0.016279	69.812	4489700	0.965952	14.5286	0.00543933	104.44	36288000
PF3D7_0619400	63	63	PF3D7_0619400	cell division cycle protein 48 homologue, putative	>PF3D7_0619400 organism=Plasmodium_falciparum_3D7 product=cell division cycle protein 48 homologue, putative location=Pf3D7_06_v3:815622-818247(-) length=828 sequence_SO=chromosome SO=protein_coding	1	K	RMEELNFFRGDTIIIKGKKRHSTICIILNDN	7			0.984033	GDTIIIK(0.984)GK(0.016)	FALSE	GDTIIIK(17.9)GK(-17.9)	2	0.074282	17.8977	0.0338089	66.692	32.439	66.692											0.984033	17.8977	0.0338089	66.692	1916500
PF3D7_0619400	19	19	PF3D7_0619400	cell division cycle protein 48 homologue, putative	>PF3D7_0619400 organism=Plasmodium_falciparum_3D7 product=cell division cycle protein 48 homologue, putative location=Pf3D7_06_v3:815622-818247(-) length=828 sequence_SO=chromosome SO=protein_coding	1	K	NTDKKALVDENNGENKVPKKKNLSRLIVEEA	11			0.983077	ALVDENNGENK(0.983)VPK(0.017)	FALSE	ALVDENNGENK(17.64)VPK(-17.64)	3	0.41382	17.6411	0.00145969	45.992	40.897	45.992																0.983077	17.6411	0.00145969	45.992	9703600
PF3D7_0621100	804	804	PF3D7_0621100	conserved Plasmodium protein, unknown function	>PF3D7_0621100 organism=Plasmodium_falciparum_3D7 product=conserved Plasmodium protein, unknown function location=Pf3D7_06_v3:865845-869909(-) length=1354 sequence_SO=chromosome SO=protein_coding	1	K	VLKYMNAKYKKSVYEKSTSKVNFSEIKIIKL	5			0.994954	SVYEK(0.995)STSK(0.005)	FALSE	SVYEK(22.95)STSK(-22.95)	2	-0.28833	22.9488	0.0283679	70.552	54.354	70.552																0.994954	22.9488	0.0283679	70.552	7609200
PF3D7_0621200	151	151	PF3D7_0621200	pyridoxine biosynthesis protein PDX1	>PF3D7_0621200 organism=Plasmodium_falciparum_3D7 product=pyridoxine biosynthesis protein PDX1 (PDX1) location=Pf3D7_06_v3:871297-872202(-) length=301 sequence_SO=chromosome SO=protein_coding	1	K	EALRRISEGASMIRTKGEAGTGNIIEAIKHI	2	......K..A...	motif6	1	TK(1)GEAGTGNIIEAIK	FALSE	TK(107.57)GEAGTGNIIEAIK(-107.57)	3	0.14513	107.571	7.28682e-08	119.54	66.968	109.79						1	107.571	2.45E-06	112.34	66714000	1	66.1758	2.94174e-05	71.08	4941900	1	108.194	7.28682e-08	119.54	179480000
PF3D7_0621200	190	190	PF3D7_0621200	pyridoxine biosynthesis protein PDX1	>PF3D7_0621200 organism=Plasmodium_falciparum_3D7 product=pyridoxine biosynthesis protein PDX1 (PDX1) location=Pf3D7_06_v3:871297-872202(-) length=301 sequence_SO=chromosome SO=protein_coding	1	K	YLCSLSDSEVYHFAKKINAPIDLVLLTKKLK	1	......K..A...	motif6	0.999935	K(1)INAPIDLVLLTK	FALSE	K(41.89)INAPIDLVLLTK(-41.89)	2	-0.68811	41.8882	0.016162	44.968	29.028	44.968																0.999935	41.8882	0.016162	44.968	3500900
PF3D7_0624000	419	419	PF3D7_0624000	hexokinase	>PF3D7_0624000 organism=Plasmodium_falciparum_3D7 product=hexokinase (HK) location=Pf3D7_06_v3:981066-982547(+) length=493 sequence_SO=chromosome SO=protein_coding	1	K	NRSAALAAGTIAAIAKRIKIIEHSKFTCGVD	14	.....AK......	motif5	1	SAALAAGTIAAIAK(1)R	FALSE	SAALAAGTIAAIAK(63.29)R	2	0.05567	63.2903	9.56441e-09	105.19	77.71	63.29																1	63.2903	9.56441e-09	95.981	6999800
PF3D7_0624600	2205	2205	PF3D7_0624600	SNF2 helicase, putative	>PF3D7_0624600 organism=Plasmodium_falciparum_3D7 product=SNF2 helicase, putative (ISWI) location=Pf3D7_06_v3:999524-1007683(+) length=2719 sequence_SO=chromosome SO=protein_coding	1	K	KKLNLLINPFHEKLIKDTHNANFIRDSFNED	3			1	LIK(1)DTHNANFIR	FALSE	LIK(40.77)DTHNANFIR	3	0.61854	40.7674	0.000161014	75.819	52.033	40.767																1	75.8194	0.000161014	75.819	16467000
PF3D7_0624600	2191	2191	PF3D7_0624600	SNF2 helicase, putative	>PF3D7_0624600 organism=Plasmodium_falciparum_3D7 product=SNF2 helicase, putative (ISWI) location=Pf3D7_06_v3:999524-1007683(+) length=2719 sequence_SO=chromosome SO=protein_coding	1	K	KSNTSSKKKDDKDLKKLNLLINPFHEKLIKD	1			0.999979	K(1)LNLLINPFHEK	FALSE	K(46.78)LNLLINPFHEK(-46.78)	3	0.36471	46.7764	0.00197618	52.395	39.817	52.395																0.999979	46.7764	0.00197618	52.395	13633000
PF3D7_0624600	2224	2224	PF3D7_0624600	SNF2 helicase, putative	>PF3D7_0624600 organism=Plasmodium_falciparum_3D7 product=SNF2 helicase, putative (ISWI) location=Pf3D7_06_v3:999524-1007683(+) length=2719 sequence_SO=chromosome SO=protein_coding	1	K	NANFIRDSFNEDFLNKAKEFLRVTKSNLINN	10	......KA.....	motif3	0.964205	DSFNEDFLNK(0.964)AK(0.036)	FALSE	DSFNEDFLNK(14.3)AK(-14.3)	2	-0.40351	14.3035	0.00462101	57.175	47.963	48.568																0.964205	14.3035	0.0288624	48.568	3904100
PF3D7_0624600	2122	2122	PF3D7_0624600	SNF2 helicase, putative	>PF3D7_0624600 organism=Plasmodium_falciparum_3D7 product=SNF2 helicase, putative (ISWI) location=Pf3D7_06_v3:999524-1007683(+) length=2719 sequence_SO=chromosome SO=protein_coding	1	K	TKDIIEIRSDLTDDMKEKINDELCTISGKRK	8			0.969289	SDLTDDMK(0.969)EK(0.031)	FALSE	SDLTDDMK(14.99)EK(-14.99)	2	0.29931	14.9917	0.0255664	61.344	41.137	61.344																0.969289	14.9917	0.0255664	61.344	3500800
PF3D7_0624600	2260	2260	PF3D7_0624600	SNF2 helicase, putative	>PF3D7_0624600 organism=Plasmodium_falciparum_3D7 product=SNF2 helicase, putative (ISWI) location=Pf3D7_06_v3:999524-1007683(+) length=2719 sequence_SO=chromosome SO=protein_coding	1	K	NNKNKKSSSNSKNINKNSSNTKNSSNTKSSS	4			0.958904	NINK(0.959)NSSNTK(0.041)	FALSE	NINK(13.68)NSSNTK(-13.68)	2	0.97363	13.6797	0.013982	74.841	29.978	74.841																0.958904	13.6797	0.013982	74.841	4296600
PF3D7_0624600	2256	2256	PF3D7_0624600	SNF2 helicase, putative	>PF3D7_0624600 organism=Plasmodium_falciparum_3D7 product=SNF2 helicase, putative (ISWI) location=Pf3D7_06_v3:999524-1007683(+) length=2719 sequence_SO=chromosome SO=protein_coding	1	K	NNNNNNKNKKSSSNSKNINKNSSNTKNSSNT	6			0.872312	SSSNSK(0.872)NINK(0.128)	FALSE	SSSNSK(8.35)NINK(-8.35)	2	1.3328	8.34522	0.0332465	58.699	26.378	58.699																0.872312	8.34522	0.0332465	58.699	3366800
PF3D7_0626800	38	38	PF3D7_0626800	pyruvate kinase	>PF3D7_0626800 organism=Plasmodium_falciparum_3D7 product=pyruvate kinase (PyrK) location=Pf3D7_06_v3:1078995-1081320(+) length=511 sequence_SO=chromosome SO=protein_coding	1	K	LRQILEPNNVNLRSKKTHIVCTLGPACKSVE	1			0.999999	K(1)THIVCTLGPACK	FALSE	K(59.23)THIVCTLGPACK(-59.23)	3	-0.28691	59.2273	0.000670093	59.227	40.603	59.227																0.999999	59.2273	0.000670093	59.227	13017000
PF3D7_0626800	251	251	PF3D7_0626800	pyruvate kinase	>PF3D7_0626800 organism=Plasmodium_falciparum_3D7 product=pyruvate kinase (PyrK) location=Pf3D7_06_v3:1078995-1081320(+) length=511 sequence_SO=chromosome SO=protein_coding	1	K	VRLIRNLLGPRGRHIKIIPKIENIEGIIHFD	3			0.999517	HIK(1)IIPK	FALSE	HIK(33.16)IIPK(-33.16)	3	0.18648	33.1555	0.0247677	46.663	9.9031	46.663																0.999517	33.1555	0.0247677	46.663	9314000
PF3D7_0627300	362	362	PF3D7_0627300	E3 ubiquitin-protein ligase RNF5, putative	>PF3D7_0627300 organism=Plasmodium_falciparum_3D7 product=E3 ubiquitin-protein ligase RNF5, putative (RNF5) location=Pf3D7_06_v3:1097300-1098649(-) length=449 sequence_SO=chromosome SO=protein_coding	1	K	SDHKYAQPEEPRPTPKRKEGVRRNNTYSNNL	12			1	YAQPEEPRPTPK(1)R	FALSE	YAQPEEPRPTPK(62.09)R	3	-0.43218	62.0879	0.00014001	80.96	63.373	62.088						0.5		0.000940602	61.11	5179900	0.5		0.00014001	80.96	7596500	1	62.0879	0.000527611	62.088
PF3D7_0627500	61	61	PF3D7_0627500	protein DJ-1	>PF3D7_0627500 organism=Plasmodium_falciparum_3D7 product=protein DJ-1 (DJ1) location=Pf3D7_06_v3:1101734-1102852(-) length=189 sequence_SO=chromosome SO=protein_coding	1	K	CLQSKNVVLADTTISKVRNNIYDVLVIPGGM	11	A.....K......	motif8	1	NVVLADTTISK(1)VR	FALSE	NVVLADTTISK(63.19)VR	2	0.34257	63.1853	0.00452997	63.185	50.177	63.185																1	63.1853	0.00452997	63.185	3317000
PF3D7_0628300	193	193	PF3D7_0628300	choline/ethanolaminephosphotransferase, putative	>PF3D7_0628300 organism=Plasmodium_falciparum_3D7 product=choline/ethanolaminephosphotransferase, putative (CEPT) location=Pf3D7_06_v3:1170813-1173696(-) length=391 sequence_SO=chromosome SO=protein_coding	1	K	ESHVLVITMCILRGLKGAGVFQRTTLKDILP	3	......K.A....	motif1	1	GLK(1)GAGVFQR	FALSE	GLK(53.12)GAGVFQR	3	-0.52456	53.1236	0.000466782	99.815	82.584	53.124																1	90.1504	0.000466782	90.15	19732000
PF3D7_0628300	9	9	PF3D7_0628300	choline/ethanolaminephosphotransferase, putative	>PF3D7_0628300 organism=Plasmodium_falciparum_3D7 product=choline/ethanolaminephosphotransferase, putative (CEPT) location=Pf3D7_06_v3:1170813-1173696(-) length=391 sequence_SO=chromosome SO=protein_coding	1	K	_______MGILFKLNKSVYSNCKSYVYKSGG	3			1	LNK(1)SVYSNCK	FALSE	LNK(137.07)SVYSNCK(-137.07)	2	0.61651	137.073	5.75794e-08	179.42	107.19	179.42																1	137.073	5.75794e-08	179.42	16300000
PF3D7_0628300	204	204	PF3D7_0628300	choline/ethanolaminephosphotransferase, putative	>PF3D7_0628300 organism=Plasmodium_falciparum_3D7 product=choline/ethanolaminephosphotransferase, putative (CEPT) location=Pf3D7_06_v3:1170813-1173696(-) length=391 sequence_SO=chromosome SO=protein_coding	1	K	LRGLKGAGVFQRTTLKDILPKSISSVLCKCV	4			1	TTLK(1)DILPK	FALSE	TTLK(80.35)DILPK(-80.35)	2	-0.84754	80.3538	0.00446631	117.7	72.33	117.7																1	80.3538	0.00446631	117.7	43805000
PF3D7_0628300	209	209	PF3D7_0628300	choline/ethanolaminephosphotransferase, putative	>PF3D7_0628300 organism=Plasmodium_falciparum_3D7 product=choline/ethanolaminephosphotransferase, putative (CEPT) location=Pf3D7_06_v3:1170813-1173696(-) length=391 sequence_SO=chromosome SO=protein_coding	1	K	GAGVFQRTTLKDILPKSISSVLCKCVLSVTM	9			0.999852	TTLKDILPK(1)SISSVLCK	FALSE	TTLK(-41.84)DILPK(40.82)SISSVLCK(-40.82)	3	-0.34423	40.8191	3.51531e-05	64.454	50.941	64.454																0.999852	40.8191	3.51531e-05	64.454	14816000
PF3D7_0628300	16	16	PF3D7_0628300	choline/ethanolaminephosphotransferase, putative	>PF3D7_0628300 organism=Plasmodium_falciparum_3D7 product=choline/ethanolaminephosphotransferase, putative (CEPT) location=Pf3D7_06_v3:1170813-1173696(-) length=391 sequence_SO=chromosome SO=protein_coding	1	K	MGILFKLNKSVYSNCKSYVYKSGGNSLLDNL	7			0.998904	SVYSNCK(0.999)SYVYK(0.001)	FALSE	SVYSNCK(29.6)SYVYK(-29.6)	3	-0.31425	29.5953	0.00370643	43.604	31.685	43.604																0.998904	29.5953	0.00370643	43.604	3957400
PF3D7_0628300	6	6	PF3D7_0628300	choline/ethanolaminephosphotransferase, putative	>PF3D7_0628300 organism=Plasmodium_falciparum_3D7 product=choline/ethanolaminephosphotransferase, putative (CEPT) location=Pf3D7_06_v3:1170813-1173696(-) length=391 sequence_SO=chromosome SO=protein_coding	1	K	__________MGILFKLNKSVYSNCKSYVYK	5			0.998017	GILFK(0.998)LNK(0.002)	FALSE	GILFK(27.02)LNK(-27.02)	2	-0.30522	27.0189	0.0151874	110.63	19.049	110.63																0.998017	27.0189	0.0151874	110.63	4952500
PF3D7_0629800	1079	1079	PF3D7_0629800	cullin-like protein, putative	>PF3D7_0629800 organism=Plasmodium_falciparum_3D7 product=cullin-like protein, putative location=Pf3D7_06_v3:1243580-1247219(-) length=1129 sequence_SO=chromosome SO=protein_coding	1	K	EDKTLHIDAAIVKFLKTNGKSSERKICSFIK	3	A.....K......	motif8	1	FLK(1)TNGK	FALSE	FLK(76.56)TNGK(-76.56)	2	1.195	76.5605	2.26636e-12	175.75	59.756	130.77	0.999955	43.4307	0.000493625	120.49	270850000	1	67.8403	1.45E-06	160.03	280480000	1	76.5605	2.26636e-12	175.75	382580000	1	80.625	0.00225165	163.34	838830000
PF3D7_0630600	2	2	PF3D7_0630600	conserved protein, unknown function	>PF3D7_0630600 organism=Plasmodium_falciparum_3D7 product=conserved Plasmodium protein, unknown function location=Pf3D7_06_v3:1279820-1283246(+) length=935 sequence_SO=chromosome SO=protein_coding	1	K	______________MKTNDEILRKEEEEISK	2			1	MK(1)TNDEILRK	FALSE	MK(86.04)TNDEILRK(-86.04)	3	1.0621	86.041	6.87052e-08	110.39	75.633	96.229						1	103.546	0.000649053	103.55	109050000	1	59.9076	0.00167767	83.647	23371000	1	86.041	6.87052e-08	110.39	372090000
PF3D7_0630600	10	10	PF3D7_0630600	conserved protein, unknown function	>PF3D7_0630600 organism=Plasmodium_falciparum_3D7 product=conserved Plasmodium protein, unknown function location=Pf3D7_06_v3:1279820-1283246(+) length=935 sequence_SO=chromosome SO=protein_coding	1	K	______MKTNDEILRKEEEEISKTIALSLQE	8			0.999998	TNDEILRK(1)EEEEISK	FALSE	TNDEILRK(56.47)EEEEISK(-56.47)	3	0.20028	56.4658	2.0509e-07	119.45	81.833	107.5						0.996334	24.3419	0.00184396	46.156	4598800						0.999998	56.4658	2.0509e-07	119.45	61998000
PF3D7_0630600	702	702	PF3D7_0630600	conserved protein, unknown function	>PF3D7_0630600 organism=Plasmodium_falciparum_3D7 product=conserved Plasmodium protein, unknown function location=Pf3D7_06_v3:1279820-1283246(+) length=935 sequence_SO=chromosome SO=protein_coding	1	K	GGNSYMNNFNDSRNSKSWSPTKGSLSYNKND	3			1	NSK(1)SWSPTK	FALSE	NSK(100.32)SWSPTK(-100.32)	2	0.51844	100.324	0.00184458	129.28	83.913	129.28						1	100.324	0.00184458	129.28	34252000
PF3D7_0702400	123	123	PF3D7_0702400	small exported membrane protein 1	>PF3D7_0702400 organism=Plasmodium_falciparum_3D7 product=small exported membrane protein 1 (SEMP1) location=Pf3D7_07_v3:101694-102285(+) length=123 sequence_SO=chromosome SO=protein_coding	1	K	MLAKIVRFQASLQNAK_______________	9			1	FQASLQNAK(1)	TRUE	FQASLQNAK(51.95)	2	-1.7662	51.9491	0.0197952	99.442	59.339	51.949						1	51.9491	0.0405804	82.287	44377000	1	98.2329	0.0211945	98.233	65426000	1	99.4417	0.0197952	99.442	66136000
PF3D7_0702400	22	22	PF3D7_0702400	small exported membrane protein 1	>PF3D7_0702400 organism=Plasmodium_falciparum_3D7 product=small exported membrane protein 1 (SEMP1) location=Pf3D7_07_v3:101694-102285(+) length=123 sequence_SO=chromosome SO=protein_coding	1	K	QQNEEGAATAANTQEKKFNPTRNPSQSGPYR	16	A.....K......	motif8	0.894201	QQNEEGAATAANTQEK(0.894)K(0.106)	FALSE	QQNEEGAATAANTQEK(9.27)K(-9.27)	3	-0.16819	9.26951	0.00039283	43.532	24.261	43.532											0.894201	9.26951	0.00039283	43.532	11570000
PF3D7_0702500	69	69	PF3D7_0702500	Plasmodium exported protein, unknown function	>PF3D7_0702500 organism=Plasmodium_falciparum_3D7 product=Plasmodium exported protein, unknown function location=Pf3D7_07_v3:104957-105989(-) length=253 sequence_SO=chromosome SO=protein_coding	1	K	KKRKGMRILKSSSVTKGRLYRGTVFDEDDNV	6			1	SSSVTK(1)GR	FALSE	SSSVTK(78.38)GR	2	-0.12852	78.3766	0.0370159	78.377	29.051	78.377											1	78.3766	0.0370159	78.377	12553000
PF3D7_0702500	63	63	PF3D7_0702500	Plasmodium exported protein, unknown function	>PF3D7_0702500 organism=Plasmodium_falciparum_3D7 product=Plasmodium exported protein, unknown function location=Pf3D7_07_v3:104957-105989(-) length=253 sequence_SO=chromosome SO=protein_coding	1	K	KYIRSYKKRKGMRILKSSSVTKGRLYRGTVF	3			0.999999	ILK(1)SSSVTK	FALSE	ILK(61.23)SSSVTK(-61.23)	2	0.31422	61.227	0.0188102	79.489	22.387	79.489						0.999999	61.227	0.0188102	79.489	7747700
PF3D7_0704100	503	503	PF3D7_0704100	conserved Plasmodium membrane protein, unknown function	>PF3D7_0704100 organism=Plasmodium_falciparum_3D7 product=conserved Plasmodium membrane protein, unknown function location=Pf3D7_07_v3:180036-190715(+) length=3559 sequence_SO=chromosome SO=protein_coding	1	K	FLSKENNFTKLFTERKVYYYNIYPYYEKKNV	1			1	K(1)VYYYNIYPYYEK	FALSE	K(73.96)VYYYNIYPYYEK(-73.96)	3	-0.038313	73.9605	0.000115713	77.279	69.154	77.279																1	73.9605	0.000115713	77.279	24917000
PF3D7_0704800	1101	1101	PF3D7_0704800	protein phosphatase PPM12, putative	>PF3D7_0704800 organism=Plasmodium_falciparum_3D7 product=conserved Plasmodium protein, unknown function location=Pf3D7_07_v3:238159-242052(-) length=1297 sequence_SO=chromosome SO=protein_coding	1	K	TDESFHVVRNDIRNMKYDKNYNKNNDMLNQQ	3			0.999997	NMK(1)YDKNYNK	FALSE	NMK(54.74)YDK(-54.74)NYNK(-69.84)	3	-0.14194	54.7405	0.00079366	98.048	43.336	98.048																0.999997	54.7405	0.00079366	98.048	21311000
PF3D7_0705400	770	770	PF3D7_0705400	DNA replication licensing factor MCM7	>PF3D7_0705400 organism=Plasmodium_falciparum_3D7 product=DNA replication licensing factor MCM7 (MCM7) location=Pf3D7_07_v3:264973-267438(-) length=821 sequence_SO=chromosome SO=protein_coding	1	K	NGWIPIEEIERQSVTKGFTRAHVMNTIDKYV	5			1	QSVTK(1)GFTR	FALSE	QSVTK(66.06)GFTR	2	-0.11092	66.0557	0.0352537	66.056	37.138	66.056						1	66.0557	0.0352537	66.056	12523000
PF3D7_0705400	726	726	PF3D7_0705400	DNA replication licensing factor MCM7	>PF3D7_0705400 organism=Plasmodium_falciparum_3D7 product=DNA replication licensing factor MCM7 (MCM7) location=Pf3D7_07_v3:264973-267438(-) length=821 sequence_SO=chromosome SO=protein_coding	1	K	RLTEQSKASVSLQTEKRRRKDVSNEIMNIIK	9			1	ASVSLQTEK(1)R	FALSE	ASVSLQTEK(104.43)R	2	-1.193	104.434	0.00920244	104.43	46.001	104.43						1	104.434	0.00920244	104.43
PF3D7_0707700	717	717	PF3D7_0707700	E3 ubiquitin-protein ligase, putative	>PF3D7_0707700 organism=Plasmodium_falciparum_3D7 product=E3 ubiquitin-protein ligase, putative location=Pf3D7_07_v3:357700-360585(+) length=961 sequence_SO=chromosome SO=protein_coding	1	K	KKEAEKYKVLGNQSYKLGYFESAIDYYTKAI	8			0.999873	VLGNQSYK(1)LGYFESAIDYYTK	FALSE	VLGNQSYK(38.97)LGYFESAIDYYTK(-38.97)	3	0.30711	38.9717	0.000440185	41.615	39.12	41.615																0.999873	38.9717	0.000440185	41.615	8088900
PF3D7_0708400	364	364	PF3D7_0708400	heat shock protein 90	>PF3D7_0708400 organism=Plasmodium_falciparum_3D7 product=heat shock protein 90 (HSP90) location=Pf3D7_07_v3:381592-384614(+) length=745 sequence_SO=chromosome SO=protein_coding	1	K	SVEGQLEFKALLFIPKRAPFDMFENRKKRNN	7	......K.A....	motif1	1	ALLFIPK(1)R	FALSE	ALLFIPK(80.46)R	2	3.4283	80.4623	0.00824388	108.24	80.064	80.462	1	50.1265	0.00949101	94.407	69452000	1	80.4623	0.00824388	108.24	585330000	1	72.1384	0.0281389	72.138	4351300	1	81.2967	0.00949101	94.407	29494000
PF3D7_0708400	497	497	PF3D7_0708400	heat shock protein 90	>PF3D7_0708400 organism=Plasmodium_falciparum_3D7 product=heat shock protein 90 (HSP90) location=Pf3D7_07_v3:381592-384614(+) length=745 sequence_SO=chromosome SO=protein_coding		K	LRFQTSKSGDEMIGLKEYVDRMKENQKDIYY	9			1	SGDEMIGLK(1)EYVDR	FALSE	SGDEMIGLK(59.71)EYVDR	2	1.6639	59.7088	7.65535e-34	208.68	185.79	59.709	1	50.8061	1.97E-12	169.04	31098000	1	59.7088	7.66E-34	208.68	1127700000	1	58.8852	1.49411e-06	93.478	15877000	1	68.0444	6.92205e-09	158.52	153140000
PF3D7_0708400	166	166	PF3D7_0708400	heat shock protein 90	>PF3D7_0708400 organism=Plasmodium_falciparum_3D7 product=heat shock protein 90 (HSP90) location=Pf3D7_07_v3:381592-384614(+) length=745 sequence_SO=chromosome SO=protein_coding	1	K	AAGGSFTVTKDETNEKLGRGTKIILHLKEDQ	6			1	DETNEK(1)LGR	FALSE	DETNEK(136.57)LGR	2	0.33795	136.566	0.00228085	136.57	66.742	136.57											1	136.566	0.00228085	136.57	46839000	1	115.714	0.00464307	115.71	33076000
PF3D7_0708400	651	651	PF3D7_0708400	heat shock protein 90	>PF3D7_0708400 organism=Plasmodium_falciparum_3D7 product=heat shock protein 90 (HSP90) location=Pf3D7_07_v3:381592-384614(+) length=745 sequence_SO=chromosome SO=protein_coding	1	K	QALRDNSMTSYMLSKKIMEINARHPIISALK	1	......K.....A	motif2	1	K(1)IMEINAR	FALSE	K(71.69)IMEINAR	2	-0.85425	71.692	0.00167526	143.12	84.203	71.692	1	71.692	0.00317023	137.9	50017000	1	71.692	0.00167526	143.12	667020000	1	61.6789	0.044894	61.679	5773700	1	117.399	0.0057651	123.98	40577000
PF3D7_0708400	426	426	PF3D7_0708400	heat shock protein 90	>PF3D7_0708400 organism=Plasmodium_falciparum_3D7 product=heat shock protein 90 (HSP90) location=Pf3D7_07_v3:381592-384614(+) length=745 sequence_SO=chromosome SO=protein_coding	1	K	EDLPLNISRESLQQNKILKVIKKNLIKKCLD	7			0.999949	ESLQQNK(1)ILK	FALSE	ESLQQNK(42.92)ILK(-42.92)	2	0.10904	42.9176	0.00107671	136.57	81.252	136.57	0.998501	28.2351	0.00437957	92.051	11673000	0.999949	42.9176	0.00107671	136.57	208640000	0.999724	35.5839	0.0154517	72.928	2904000	0.999099	30.4475	0.00888937	82.287	8419200
PF3D7_0708400	676	676	PF3D7_0708400	heat shock protein 90	>PF3D7_0708400 organism=Plasmodium_falciparum_3D7 product=heat shock protein 90 (HSP90) location=Pf3D7_07_v3:381592-384614(+) length=745 sequence_SO=chromosome SO=protein_coding	1	K	IISALKQKADADKSDKTVKDLIWLLFDTSLL	8	.A....K......	motif11	0.999997	ADADKSDK(1)TVK	FALSE	ADADK(-54.61)SDK(54.61)TVK(-82.76)	2	-0.028562	54.6144	2.37779e-08	177.16	102.32	177.16						0.999637	36.4699	6.42E-05	162.31	64777000						0.999997	54.6144	2.37779e-08	177.16	226730000
PF3D7_0708400	196	196	PF3D7_0708400	heat shock protein 90	>PF3D7_0708400 organism=Plasmodium_falciparum_3D7 product=heat shock protein 90 (HSP90) location=Pf3D7_07_v3:381592-384614(+) length=745 sequence_SO=chromosome SO=protein_coding	1	K	QLEYLEEKRIKDLVKKHSEFISFPIKLYCER	1			0.999998	K(1)HSEFISFPIK	FALSE	K(58.05)HSEFISFPIK(-58.05)	3	-0.43821	58.0491	0.00192355	58.132	43.897	58.132																0.999998	58.0491	0.00192355	58.132	37975000
PF3D7_0708400	477	477	PF3D7_0708400	heat shock protein 90	>PF3D7_0708400 organism=Plasmodium_falciparum_3D7 product=heat shock protein 90 (HSP90) location=Pf3D7_07_v3:381592-384614(+) length=745 sequence_SO=chromosome SO=protein_coding	1	K	KNLKLGIHEDNANRTKITELLRFQTSKSGDE	2	..A...K......	motif11	1	TK(1)ITELLR	FALSE	TK(94.31)ITELLR	2	-0.38627	94.3095	0.0227075	97.431	16.992	94.309						1	94.3095	0.0238088	96.034	200860000						1	97.4306	0.0227075	97.431	27916000
PF3D7_0708400	650	650	PF3D7_0708400	heat shock protein 90	>PF3D7_0708400 organism=Plasmodium_falciparum_3D7 product=heat shock protein 90 (HSP90) location=Pf3D7_07_v3:381592-384614(+) length=745 sequence_SO=chromosome SO=protein_coding	1	K	AQALRDNSMTSYMLSKKIMEINARHPIISAL	11			0.967328	DNSMTSYMLSK(0.967)K(0.033)	FALSE	DNSMTSYMLSK(14.71)K(-14.71)	2	0.72869	14.714	0.000456031	94.122	60.154	63.181						0.967328	14.714	0.000456031	94.122	18711000						0.842902	7.29606	0.0308354	52.576
PF3D7_0708400	533	533	PF3D7_0708400	heat shock protein 90	>PF3D7_0708400 organism=Plasmodium_falciparum_3D7 product=heat shock protein 90 (HSP90) location=Pf3D7_07_v3:381592-384614(+) length=745 sequence_SO=chromosome SO=protein_coding	1	K	INAVSNSPFLEALTKKGFEVIYMVDPIDEYA	1	..A...K......	motif11	1	K(1)GFEVIYMVDPIDEYAVQQLK	FALSE	K(63.63)GFEVIYMVDPIDEYAVQQLK(-63.63)	3	-1.8171	63.6325	4.87272e-07	63.869	57.643	63.869						1	63.6325	4.87E-07	63.869	23390000
PF3D7_0708400	666	666	PF3D7_0708400	heat shock protein 90	>PF3D7_0708400 organism=Plasmodium_falciparum_3D7 product=heat shock protein 90 (HSP90) location=Pf3D7_07_v3:381592-384614(+) length=745 sequence_SO=chromosome SO=protein_coding	1	K	KIMEINARHPIISALKQKADADKSDKTVKDL	8	......K..A...	motif6	0.998097	HPIISALK(0.998)QK(0.002)	FALSE	HPIISALK(27.2)QK(-27.2)	2	0.10165	27.1962	0.000428366	94.309	72.281	94.309						0.998097	27.1962	0.000428366	94.309	86514000
PF3D7_0708400	595	595	PF3D7_0708400	heat shock protein 90	>PF3D7_0708400 organism=Plasmodium_falciparum_3D7 product=heat shock protein 90 (HSP90) location=Pf3D7_07_v3:381592-384614(+) length=745 sequence_SO=chromosome SO=protein_coding	1	K	FETLKAEYEGLCKVIKDVLHEKVEKVVVGQR	3			1	VIK(1)DVLHEK	FALSE	VIK(63.23)DVLHEK(-63.23)	2	0.52667	63.2279	0.0132044	87.258	42.395	87.258						1	63.2279	0.0132044	87.258	19762000
PF3D7_0708400	465	465	PF3D7_0708400	heat shock protein 90	>PF3D7_0708400 organism=Plasmodium_falciparum_3D7 product=heat shock protein 90 (HSP90) location=Pf3D7_07_v3:381592-384614(+) length=745 sequence_SO=chromosome SO=protein_coding	1	K	KENYKKFYEQFSKNLKLGIHEDNANRTKITE	3			1	NLK(1)LGIHEDNANR	FALSE	NLK(49.3)LGIHEDNANR	3	0.038672	49.2981	2.80613e-05	109.15	65.248	49.298						1	49.2981	2.81E-05	109.15	78120000
PF3D7_0708400	488	488	PF3D7_0708400	heat shock protein 90	>PF3D7_0708400 organism=Plasmodium_falciparum_3D7 product=heat shock protein 90 (HSP90) location=Pf3D7_07_v3:381592-384614(+) length=745 sequence_SO=chromosome SO=protein_coding		K	ANRTKITELLRFQTSKSGDEMIGLKEYVDRM	5			1	FQTSK(1)SGDEMIGLK(1)EYVDR	FALSE	FQTSK(59.37)SGDEMIGLK(59.37)EYVDR	3	0.04558	59.3721	1.97444e-06	79.875	62.758	59.372						1	59.3721	1.97E-06	79.875	45087000
PF3D7_0708400	319	319	PF3D7_0708400	heat shock protein 90	>PF3D7_0708400 organism=Plasmodium_falciparum_3D7 product=heat shock protein 90 (HSP90) location=Pf3D7_07_v3:381592-384614(+) length=745 sequence_SO=chromosome SO=protein_coding	1	K	HEWEELNKQKPLWMRKPEEVTNEEYASFYKS	1			0.999985	K(1)PEEVTNEEYASFYK	FALSE	K(48.21)PEEVTNEEYASFYK(-48.21)	3	0.40699	48.2084	0.000467205	50.827	37.655	48.423						0.999985	48.2084	0.000467205	50.827	6483700
PF3D7_0708400	206	206	PF3D7_0708400	heat shock protein 90	>PF3D7_0708400 organism=Plasmodium_falciparum_3D7 product=heat shock protein 90 (HSP90) location=Pf3D7_07_v3:381592-384614(+) length=745 sequence_SO=chromosome SO=protein_coding	1	K	KDLVKKHSEFISFPIKLYCERQNEKEITASE	10			1	HSEFISFPIK(1)LYCER	FALSE	HSEFISFPIK(74.79)LYCER	3	0.88708	74.7892	2.21847e-05	74.789	67.278	74.789																1	74.7892	2.21847e-05	74.789	4239300
PF3D7_0708400	604	604	PF3D7_0708400	heat shock protein 90	>PF3D7_0708400 organism=Plasmodium_falciparum_3D7 product=heat shock protein 90 (HSP90) location=Pf3D7_07_v3:381592-384614(+) length=745 sequence_SO=chromosome SO=protein_coding	1	K	GLCKVIKDVLHEKVEKVVVGQRITDSPCVLV	3			1	VEK(1)VVVGQR	FALSE	VEK(106.68)VVVGQR	3	0.27447	106.683	7.64977e-06	195.79	103.92	106.68						1	106.683	7.65E-06	195.79	660360000						1	74.3762	0.00101714	99.688	9460200
PF3D7_0708400	601	601	PF3D7_0708400	heat shock protein 90	>PF3D7_0708400 organism=Plasmodium_falciparum_3D7 product=heat shock protein 90 (HSP90) location=Pf3D7_07_v3:381592-384614(+) length=745 sequence_SO=chromosome SO=protein_coding	1	K	EYEGLCKVIKDVLHEKVEKVVVGQRITDSPC	6			0.999994	DVLHEK(1)VEK	FALSE	DVLHEK(52.33)VEK(-52.33)	2	0.61355	52.3342	0.00566342	104.82	46.125	104.82						0.999994	52.3342	0.00566342	104.82	15825000						0.975935	16.0803	0.048102	60.398	3179600
PF3D7_0708400;sp|P07900|HS90A_HUMAN;sp|P07900-2|HS90A_HUMAN		455	PF3D7_0708400	heat shock protein 90	>PF3D7_0708400 organism=Plasmodium_falciparum_3D7 product=heat shock protein 90 (HSP90) location=Pf3D7_07_v3:381592-384614(+) length=745 sequence_SO=chromosome SO=protein_coding;>sp|P07900|HS90A_HUMAN Heat shock protein HSP 90-alpha OS=Homo sapiens GN=HSP	1	K	LDMFSELAENKENYKKFYEQFSKNLKLGIHE	1			1	K(1)FYEQFSK	FALSE	K(95.36)FYEQFSK(-95.36)	2	0.13959	95.3581	0.00400903	147.2	103.39	95.358						1	95.3581	0.00400903	147.2	18644000
PF3D7_0708400;sp|P08238|HS90B_HUMAN;sp|P07900|HS90A_HUMAN;sp|P07900-2|HS90A_HUMAN;sp|Q58FF7|H90B3_HUMAN		381	PF3D7_0708400	heat shock protein 90	>PF3D7_0708400 organism=Plasmodium_falciparum_3D7 product=heat shock protein 90 (HSP90) location=Pf3D7_07_v3:381592-384614(+) length=745 sequence_SO=chromosome SO=protein_coding;>sp|P08238|HS90B_HUMAN Heat shock protein HSP 90-beta OS=Homo sapiens GN=HSP9	1	K	APFDMFENRKKRNNIKLYVRRVFIMDDCEEI	4			1	NNIK(1)LYVR	FALSE	NNIK(64.26)LYVR	2	-0.40921	64.2645	0.00901365	125.25	77.051	64.265						1	64.2645	0.00901365	125.25	81408000						1	104.366	0.0172403	104.37	30185000
PF3D7_0708800	61	61	PF3D7_0708800	heat shock protein 110	>PF3D7_0708800 organism=Plasmodium_falciparum_3D7 product=heat shock protein 110 (HSP110c) location=Pf3D7_07_v3:395711-398332(+) length=873 sequence_SO=chromosome SO=protein_coding	1	K	RLIGDSALSKLKSNYKNTCRNIKNLIGKIGT	4			1	SNYK(1)NTCR	FALSE	SNYK(99.44)NTCR	2	0.2418	99.4417	0.0129688	109.48	89.272	99.442						1	99.4417	0.021122	99.442	15469000						1	83.9477	0.0129688	109.48	25257000
PF3D7_0708800	252	252	PF3D7_0708800	heat shock protein 110	>PF3D7_0708800 organism=Plasmodium_falciparum_3D7 product=heat shock protein 110 (HSP110c) location=Pf3D7_07_v3:395711-398332(+) length=873 sequence_SO=chromosome SO=protein_coding	1	K	NELIKYITNIFVNNYKMNPLYKNNTPELCPM	11			0.990023	YITNIFVNNYK(0.99)MNPLYK(0.01)	FALSE	YITNIFVNNYK(19.97)MNPLYK(-19.97)	3	-0.5386	19.9665	3.41899e-07	78.69	66.198	78.69																0.990023	19.9665	3.41899e-07	78.69	21555000
PF3D7_0709000	15	15	PF3D7_0709000	chloroquine resistance transporter	>PF3D7_0709000 organism=Plasmodium_falciparum_3D7 product=chloroquine resistance transporter (CRT) location=Pf3D7_07_v3:403222-406317(+) length=424 sequence_SO=chromosome SO=protein_coding	1	K	_MKFASKKNNQKNSSKNDERYRELDNLVQEG	4			1	NSSK(1)NDER	FALSE	NSSK(74.46)NDER	2	-0.52643	74.4644	0.0179862	103.42	55.825	74.464											1	74.4644	0.0179862	103.42	188510000
PF3D7_0709700	2	2	PF3D7_0709700	prodrug activation and resistance esterase	>PF3D7_0709700 organism=Plasmodium_falciparum_3D7 product=lysophospholipase, putative location=Pf3D7_07_v3:435089-436195(-) length=368 sequence_SO=chromosome SO=protein_coding	1	K	______________MKSQGGGKISRKSSTGS	2			1	MK(1)SQGGGK	FALSE	MK(66.21)SQGGGK(-66.21)	2	0.55653	66.2078	0.00309431	86.833	18.8	86.833																1	66.2078	0.00309431	86.833	188940000
PF3D7_0709700	196	196	PF3D7_0709700	prodrug activation and resistance esterase	>PF3D7_0709700 organism=Plasmodium_falciparum_3D7 product=lysophospholipase, putative location=Pf3D7_07_v3:435089-436195(-) length=368 sequence_SO=chromosome SO=protein_coding	1	K	GGNVVLRTLQILGKSKDNNNKLNIRGCIPLA	2			0.934572	SK(0.935)DNNNK(0.065)LNIR	FALSE	SK(11.55)DNNNK(-11.55)LNIR	3	0.99221	11.5485	0.00196272	69.721	41.516	69.721																0.934572	11.5485	0.00196272	69.721	29056000
PF3D7_0709700	79	79	PF3D7_0709700	prodrug activation and resistance esterase	>PF3D7_0709700 organism=Plasmodium_falciparum_3D7 product=lysophospholipase, putative location=Pf3D7_07_v3:435089-436195(-) length=368 sequence_SO=chromosome SO=protein_coding	1	K	RLEYLRHNVEVVNNNKAILKDGDNYYIYKNS	10	......KA.....	motif3	0.999237	HNVEVVNNNK(0.999)AILK(0.001)	FALSE	HNVEVVNNNK(31.17)AILK(-31.17)	3	0.88115	31.172	4.83448e-05	82.069	64.403	82.069																0.999237	31.172	4.83448e-05	82.069	17013000
PF3D7_0709700	201	201	PF3D7_0709700	prodrug activation and resistance esterase	>PF3D7_0709700 organism=Plasmodium_falciparum_3D7 product=lysophospholipase, putative location=Pf3D7_07_v3:435089-436195(-) length=368 sequence_SO=chromosome SO=protein_coding	1	K	LRTLQILGKSKDNNNKLNIRGCIPLAGMISI	5			1	DNNNK(1)LNIR	FALSE	DNNNK(66.69)LNIR	2	0.092821	66.6919	0.00447912	66.692	49.461	66.692																1	66.6919	0.00447912	66.692	3845000
PF3D7_0709700	34	34	PF3D7_0709700	prodrug activation and resistance esterase	>PF3D7_0709700 organism=Plasmodium_falciparum_3D7 product=lysophospholipase, putative location=Pf3D7_07_v3:435089-436195(-) length=368 sequence_SO=chromosome SO=protein_coding	1	K	SSRLDGNPKLDSFHNKDGLSLKTYAWTVKNP	7			0.998887	LDSFHNK(0.999)DGLSLK(0.001)	FALSE	LDSFHNK(29.53)DGLSLK(-29.53)	3	0.1831	29.5293	0.00477839	40.475	14.493	40.475																0.998887	29.5293	0.00477839	40.475	4453400
PF3D7_0710000	2733	2733	PF3D7_0710000	conserved Plasmodium protein, unknown function	>PF3D7_0710000 organism=Plasmodium_falciparum_3D7 product=conserved Plasmodium protein, unknown function location=Pf3D7_07_v3:447515-458496(-) length=3267 sequence_SO=chromosome SO=protein_coding	1	K	TLRKYLELYKMRNIQKEKRKIFFILLKYKNI	6			0.937111	MRNIQK(0.937)EK(0.063)	FALSE	MRNIQK(11.74)EK(-11.74)	2	3.1635	11.7422	0.0100021	54.611	20.425	54.611																0.937111	11.7422	0.0100021	54.611
PF3D7_0714000	9	9	PF3D7_0714000	histone H2B variant	>PF3D7_0714000 organism=Plasmodium_falciparum_3D7 product=histone H2B variant (H2B.Z) location=Pf3D7_07_v3:643101-643472(-) length=123 sequence_SO=chromosome SO=protein_coding	1	K	_______MSGKGPAQKSQAAKKTAGKTLGPR	5	......K..A...	motif6	1	GPAQK(1)SQAAK	FALSE	GPAQK(77.36)SQAAK(-77.36)	2	0.42089	77.357	9.44252e-07	172.1	104.6	147.91											0.998597	28.5224	0.00287863	99.973	16229000	1	77.357	9.44252e-07	172.1	83985000
PF3D7_0714000	105	105	PF3D7_0714000	histone H2B variant	>PF3D7_0714000 organism=Plasmodium_falciparum_3D7 product=histone H2B variant (H2B.Z) location=Pf3D7_07_v3:643101-643472(-) length=123 sequence_SO=chromosome SO=protein_coding	1	K	EIQTAVRLLLPGELSKHAVSEGTKAVTKYTT	9	......K.A....	motif1	0.999999	LLLPGELSK(1)HAVSEGTK	FALSE	LLLPGELSK(60.38)HAVSEGTK(-60.38)	4	-0.39893	60.3813	1.92889e-08	110.12	90.445	90.453																0.999999	60.3813	3.28212e-08	105.39	47273000
PF3D7_0714000	19	19	PF3D7_0714000	histone H2B variant	>PF3D7_0714000 organism=Plasmodium_falciparum_3D7 product=histone H2B variant (H2B.Z) location=Pf3D7_07_v3:643101-643472(-) length=123 sequence_SO=chromosome SO=protein_coding	1	K	KGPAQKSQAAKKTAGKTLGPRHKRKRRTESF	4	.....GK......	motif4	1	TAGK(1)TLGPR	FALSE	TAGK(78.94)TLGPR	2	-0.49796	78.9389	0.0193986	78.939	45.201	78.939																1	78.9389	0.0193986	78.939	16642000
PF3D7_0714000;sp|P57053|H2BFS_HUMAN		113	PF3D7_0714000	histone H2B variant	>PF3D7_0714000 organism=Plasmodium_falciparum_3D7 product=histone H2B variant (H2B.Z) location=Pf3D7_07_v3:643101-643472(-) length=123 sequence_SO=chromosome SO=protein_coding;>sp|P57053|H2BFS_HUMAN Histone H2B type F-S OS=Homo sapiens GN=H2BFS PE=1 SV=2	1	K	LLPGELSKHAVSEGTKAVTKYTTSAA_____	8	......KA.....	motif3	1	HAVSEGTK(1)AVTK	FALSE	HAVSEGTK(95.65)AVTK(-95.65)	2	0.19583	95.6495	7.21421e-21	215.02	175.84	197.36	1	78.4294	5.67E-09	168.76	118540000	1	95.6495	1.79E-17	197.36	734320000	1	97.613	1.96749e-20	211.22	554620000	1	106.038	7.21421e-21	215.02	943070000
PF3D7_0714000;sp|P57053|H2BFS_HUMAN		117	PF3D7_0714000	histone H2B variant	>PF3D7_0714000 organism=Plasmodium_falciparum_3D7 product=histone H2B variant (H2B.Z) location=Pf3D7_07_v3:643101-643472(-) length=123 sequence_SO=chromosome SO=protein_coding;>sp|P57053|H2BFS_HUMAN Histone H2B type F-S OS=Homo sapiens GN=H2BFS PE=1 SV=2	1	K	ELSKHAVSEGTKAVTKYTTSAA_________	4	......K.....A	motif2	1	AVTK(1)YTTSAA	FALSE	AVTK(70.06)YTTSAA	2	-0.25748	70.0564	0.00245235	102.55	84.109	70.056						1	70.0564	0.0147502	73.841	19042000000	1	80.9863	0.00618893	88.134	11693000000	1	102.549	0.00245235	102.55	2720900000
PF3D7_0715800	91	91	PF3D7_0715800	drug/metabolite transporter DMT1, putative	>PF3D7_0715800 organism=Plasmodium_falciparum_3D7 product=drug/metabolite exporter, drug/metabolite transporter location=Pf3D7_07_v3:695600-696904(-) length=434 sequence_SO=chromosome SO=protein_coding	1	K	MIYMFISKKPCSQNKKLLDQDMKEIDTEMNS	1			1	K(1)LLDQDMK	FALSE	K(88.55)LLDQDMK(-88.55)	2	-0.40073	88.5535	0.0162282	91.087	25.835	91.087											1	88.5535	0.0162282	91.087	12202000
PF3D7_0716800	138	138	PF3D7_0716800	eukaryotic translation initiation factor 3 subunit I, putative	>PF3D7_0716800 organism=Plasmodium_falciparum_3D7 product=eukaryotic translation initiation factor 3 subunit I, putative (EIF3I) location=Pf3D7_07_v3:732070-733496(-) length=327 sequence_SO=chromosome SO=protein_coding	1	K	RSIKLYDLKSDNLIWKQDHESRCIQVRWCFF	7			1	SDNLIWK(1)QDHESR	FALSE	SDNLIWK(77.78)QDHESR	3	-0.50621	77.7756	9.26949e-05	77.776	68.979	77.776																1	77.7756	9.26949e-05	77.776	20788000
PF3D7_0718500	65	65	PF3D7_0718500	prefoldin subunit 3, putative	>PF3D7_0718500 organism=Plasmodium_falciparum_3D7 product=prefoldin subunit 3, putative location=Pf3D7_07_v3:824445-825884(+) length=192 sequence_SO=chromosome SO=protein_coding	1	K	FMEHAFVSRQINTQKKIPELKDALRVVQLLE	1			0.999977	K(1)IPELKDALR	FALSE	K(46.35)IPELK(-46.35)DALR	3	-0.56205	46.3485	0.00951843	55.353	36.221	55.353						0.999977	46.3485	0.00951843	55.353	27480000
PF3D7_0718500	89	89	PF3D7_0718500	prefoldin subunit 3, putative	>PF3D7_0718500 organism=Plasmodium_falciparum_3D7 product=prefoldin subunit 3, putative location=Pf3D7_07_v3:824445-825884(+) length=192 sequence_SO=chromosome SO=protein_coding	1	K	RVVQLLEKRKKIKEKKNLETFFPVEESLYAR	1			1	K(1)NLETFFPVEESLYAR	FALSE	K(48.22)NLETFFPVEESLYAR	3	0.99547	48.2163	0.000367483	48.216	36.574	48.216																1	48.2163	0.000367483	48.216	4647500
PF3D7_0719600	4	4	PF3D7_0719600	60S ribosomal protein L11a, putative	>PF3D7_0719600 organism=Plasmodium_falciparum_3D7 product=60S ribosomal protein L11a, putative location=Pf3D7_07_v3:858742-859492(-) length=173 sequence_SO=chromosome SO=protein_coding	1	K	____________MENKEQNVMREIKVNKLVL	4			1	MENK(1)EQNVMR	FALSE	MENK(41.16)EQNVMR	2	-0.13319	41.1636	0.0125967	41.164	33.298	41.164											1	41.1636	0.0125967	41.164	3035700
PF3D7_0719900	3281	3281	PF3D7_0719900	conserved Plasmodium membrane protein, unknown function	>PF3D7_0719900 organism=Plasmodium_falciparum_3D7 product=conserved Plasmodium membrane protein, unknown function location=Pf3D7_07_v3:865927-876132(+) length=3401 sequence_SO=chromosome SO=protein_coding	1	K	VIIPKCSKILDMHNYKNIGIKKKYIQSKVNQ	8	......K..G...	motif9	1	ILDMHNYK(1)	TRUE	ILDMHNYK(48.56)	2	1.0438	48.5612	0.0335583	48.561	16.206	48.561						1	48.5612	0.0335583	48.561	16895000
PF3D7_0721400	192	192	PF3D7_0721400	rhoptry protein, putative	>PF3D7_0721400 organism=Plasmodium_falciparum_3D7 product=conserved Plasmodium protein, unknown function location=Pf3D7_07_v3:926692-928028(+) length=214 sequence_SO=chromosome SO=protein_coding	1	K	IIFIDDDMNNCISARKEGYITFNVTGKDGFN	1	....A.K......	motif10	0.999897	K(1)EGYITFNVTGK	FALSE	K(39.87)EGYITFNVTGK(-39.87)	2	0.066254	39.8663	0.0149105	49.988	31.915	49.988																0.999897	39.8663	0.0149105	49.988	2187200
PF3D7_0721400	203	203	PF3D7_0721400	rhoptry protein, putative	>PF3D7_0721400 organism=Plasmodium_falciparum_3D7 product=conserved Plasmodium protein, unknown function location=Pf3D7_07_v3:926692-928028(+) length=214 sequence_SO=chromosome SO=protein_coding	1	K	ISARKEGYITFNVTGKDGFNFKNIQIL____	12	.....GK......	motif4	0.999976	KEGYITFNVTGK(1)DGFNFK	FALSE	K(-86.44)EGYITFNVTGK(46.14)DGFNFK(-46.14)	3	0.20837	46.1395	1.33645e-12	124.99	105.32	124.99																0.999976	46.1395	1.33645e-12	124.99	12915000
PF3D7_0722400	392	392	PF3D7_0722400	Obg-like ATPase 1, putative	>PF3D7_0722400 organism=Plasmodium_falciparum_3D7 product=GTP-binding protein, putative location=Pf3D7_07_v3:954784-956343(+) length=393 sequence_SO=chromosome SO=protein_coding	1	K	DGDIIFFKFNVSSGGKK______________	8			0.860676	FNVSSGGK(0.861)K(0.139)	FALSE	FNVSSGGK(7.91)K(-7.91)	2	-0.067044	7.90814	0.0284874	60.398	13.972	60.398																0.860676	7.90814	0.0284874	60.398	4443300
PF3D7_0730300	1227	1227	PF3D7_0730300	AP2 domain transcription factor AP2-L, putative	>PF3D7_0730300 organism=Plasmodium_falciparum_3D7 product=transcription factor with AP2 domain(s) (AP2-L) location=Pf3D7_07_v3:1297459-1301454(+) length=1331 sequence_SO=chromosome SO=protein_coding	1	K	NNENVGTGEIKISNDKYLKITQEAIEMILSN	5			0.999969	ISNDK(1)YLK	FALSE	ISNDK(45.08)YLK(-45.08)	2	0.68004	45.0757	0.0290706	88.294	24.621	88.294																0.999969	45.0757	0.0290706	88.294	3955300
PF3D7_0730400	52	52	PF3D7_0730400	IMP1-like protein, putative	>PF3D7_0730400 organism=Plasmodium_falciparum_3D7 product=conserved Plasmodium protein, unknown function location=Pf3D7_07_v3:1304347-1305096(+) length=158 sequence_SO=chromosome SO=protein_coding	1	K	PTKEVPEFKFVNRNGKNELIRNLQSDKKLFY	3	.....GK......	motif4	1	NGK(1)NELIR	FALSE	NGK(60.02)NELIR	2	-0.46461	60.0191	0.0340058	80.165	26.391	60.019																1	80.1654	0.0340058	80.165	4078600
PF3D7_0731300	288	288	PF3D7_0731300	Plasmodium exported protein (PHISTb), unknown function	>PF3D7_0731300 organism=Plasmodium_falciparum_3D7 product=Plasmodium exported protein (PHISTb), unknown function (PfG174) location=Pf3D7_07_v3:1350032-1351149(+) length=317 sequence_SO=chromosome SO=protein_coding	1	K	LRSFELERNLIVCEEKSNKSDNINLEKNKKS	8			0.805727	NLIVCEEK(0.806)SNK(0.194)	FALSE	NLIVCEEK(6.18)SNK(-6.18)	2	-0.22288	6.17775	0.00202074	105.46	34.01	105.46											0.805727	6.17775	0.00202074	105.46	5384100
PF3D7_0731500	122	122	PF3D7_0731500	erythrocyte binding antigen-175	>PF3D7_0731500 organism=Plasmodium_falciparum_3D7 product=erythrocyte binding antigen-175 (EBA175) location=Pf3D7_07_v3:1358055-1362929(+) length=1502 sequence_SO=chromosome SO=protein_coding	1	K	NYQSFLSTSSLIKQNKYVPINAVRVSRILSF	3	......K.....A	motif2	1	QNK(1)YVPINAVR	FALSE	QNK(40.73)YVPINAVR	3	1.0464	40.7274	0.00764123	40.727	23.062	40.727																1	40.7274	0.00764123	40.727	3238800
PF3D7_0731600;PF3D7_1477900		512	PF3D7_0731600	acyl-CoA synthetase	>PF3D7_0731600 organism=Plasmodium_falciparum_3D7 product=acyl-CoA synthetase (ACS5) location=Pf3D7_07_v3:1368161-1370596(+) length=811 sequence_SO=chromosome SO=protein_coding;>PF3D7_1477900 organism=Plasmodium_falciparum_3D7 product=acyl-CoA synthetase,	1	K	ESMGIPFSPNTKFKVKTWETYKATDALPKGE	2			0.999996	VK(1)TWETYK	FALSE	VK(54.01)TWETYK(-54.01)	2	0.32838	54.015	0.0331956	60.91	20.186	60.91						0.999996	54.015	0.0331956	60.91		0.999994	52.098	0.0382487	57.859
PF3D7_0801000	962	962	PF3D7_0801000	Plasmodium exported protein (PHISTc), unknown function	>PF3D7_0801000 organism=Plasmodium_falciparum_3D7 product=Plasmodium exported protein (PHISTc), unknown function location=Pf3D7_08_v3:84568-88422(-) length=1219 sequence_SO=chromosome SO=protein_coding	1	K	RGSRYPEEERYNYNNKRSNSIPEGRNYEENA	6			1	YNYNNK(1)R	FALSE	YNYNNK(114.54)R	2	0.43068	114.539	0.0183878	129.96	73.451	114.54											1	114.539	0.0183878	129.96	58982000
PF3D7_0801000	467	467	PF3D7_0801000	Plasmodium exported protein (PHISTc), unknown function	>PF3D7_0801000 organism=Plasmodium_falciparum_3D7 product=Plasmodium exported protein (PHISTc), unknown function location=Pf3D7_08_v3:84568-88422(-) length=1219 sequence_SO=chromosome SO=protein_coding	1	K	DLKNINNSMKIEKNNKSNEQVKNTSVSKSCD	3			0.999694	NNK(1)SNEQVK	FALSE	NNK(35.15)SNEQVK(-35.15)	2	0.35657	35.1459	0.0340911	66.568	8.978	66.568											0.999694	35.1459	0.0340911	66.568	2101700
PF3D7_0801800	644	644	PF3D7_0801800	mannose-6-phosphate isomerase, putative	>PF3D7_0801800 organism=Plasmodium_falciparum_3D7 product=mannose-6-phosphate isomerase, putative location=Pf3D7_08_v3:119032-122067(-) length=1011 sequence_SO=chromosome SO=protein_coding	1	K	LEYEKGMDNNNDQLDKQKKKTSKGTTTTTTT	11			0.996552	GMDNNNDQLDK(0.997)QK(0.003)	FALSE	GMDNNNDQLDK(24.61)QK(-24.61)	2	-0.13381	24.6087	2.18809e-05	112.08	94.967	77.185																0.996552	24.6087	0.000114509	86.803	16667000
PF3D7_0802000	890	890	PF3D7_0802000	glutamate dehydrogenase, putative	>PF3D7_0802000 organism=Plasmodium_falciparum_3D7 product=glutamate dehydrogenase, putative (GDH3) location=Pf3D7_08_v3:146089-150282(+) length=1397 sequence_SO=chromosome SO=protein_coding	1	K	YKGAGCVINGENKTRKMILQEKMNEEEDLIF	1			1	K(1)MILQEK	FALSE	K(127.83)MILQEK(-127.83)	2	0.092652	127.832	0.0175416	132.57	47.999	132.57																1	127.832	0.0175416	132.57	17177000
PF3D7_0802000	1036	1036	PF3D7_0802000	glutamate dehydrogenase, putative	>PF3D7_0802000 organism=Plasmodium_falciparum_3D7 product=glutamate dehydrogenase, putative (GDH3) location=Pf3D7_08_v3:146089-150282(+) length=1397 sequence_SO=chromosome SO=protein_coding	1	K	ELIRLAKRRNNKDKSKAITCCTLYDEKYFSK	2	......KA.....	motif3	0.999986	SK(1)AITCCTLYDEK	FALSE	SK(48.53)AITCCTLYDEK(-48.53)	3	-0.0046156	48.5269	0.00184324	48.527	33.14	48.527																0.999986	48.5269	0.00184324	48.527	7732800
PF3D7_0802200	67	67	PF3D7_0802200	1-cys peroxiredoxin	>PF3D7_0802200 organism=Plasmodium_falciparum_3D7 product=1-cys peroxiredoxin (1-CysPxn) location=Pf3D7_08_v3:165416-166078(+) length=220 sequence_SO=chromosome SO=protein_coding	1	K	AEFGKMHEEFLKLNCKLIGFSCNSKESHDQW	4	......K..G...	motif9	1	LNCK(1)LIGFSCNSK	FALSE	LNCK(67.04)LIGFSCNSK(-67.04)	3	0.084835	67.0402	6.0773e-05	82.202	68.472	82.202																1	67.0402	6.0773e-05	82.202	60025000
PF3D7_0803700	333	333	PF3D7_0803700	tubulin gamma chain	>PF3D7_0803700 organism=Plasmodium_falciparum_3D7 product=tubulin gamma chain (g-tub) location=Pf3D7_08_v3:231398-232756(+) length=452 sequence_SO=chromosome SO=protein_coding	1	K	ILNIIRGETDPTQVHKGLQRIRDRKLVNFIK	10			1	GETDPTQVHK(1)GLQR	FALSE	GETDPTQVHK(44.51)GLQR	3	0.13204	44.5108	4.83448e-05	82.069	71.997	44.511																1	82.0687	4.83448e-05	82.069	15814000
PF3D7_0803800;PF3D7_0524900		45	PF3D7_0803800	proteasome subunit beta type-4	>PF3D7_0803800 organism=Plasmodium_falciparum_3D7 product=proteasome subunit beta type-4 location=Pf3D7_08_v3:233467-234426(-) length=265 sequence_SO=chromosome SO=protein_coding;>PF3D7_0524900 organism=Plasmodium_falciparum_3D7 product=tRNA-YW synthesizi	1	K	SYGSYAKFQNVERIFKINNKTVMGFSGELAD	3			0.999999	IFK(1)INNK	FALSE	IFK(60.46)INNK(-60.46)	2	0.66465	60.463	0.0258439	139.92	9.0797	139.92																0.999999	60.463	0.0258439	139.92	23552000
PF3D7_0805600	108	108	PF3D7_0805600	PAP2-like protein, putative	>PF3D7_0805600 organism=Plasmodium_falciparum_3D7 product=PAP2-like protein, putative location=Pf3D7_08_v3:312034-312960(+) length=308 sequence_SO=chromosome SO=protein_coding	1	K	ETFKKLYANYPICEAKYKLVDKLKSFKIFKK	11	.....AK......	motif5	0.986406	LYANYPICEAK(0.986)YK(0.014)	FALSE	LYANYPICEAK(18.61)YK(-18.61)	3	0.044113	18.6072	0.000746332	55.261	44.908	52.79																0.986406	18.6072	0.00114882	52.79	15637000
PF3D7_0806300	1176	1176	PF3D7_0806300	ferlin-like protein, putative	>PF3D7_0806300 organism=Plasmodium_falciparum_3D7 product=ferlin, putative location=Pf3D7_08_v3:337902-343254(-) length=1704 sequence_SO=chromosome SO=protein_coding	1	K	EETLEHVCFKINDLTKKENTYIYYNDEQETL	6			0.993306	INDLTK(0.993)K(0.007)	FALSE	INDLTK(21.71)K(-21.71)	2	1.1743	21.7141	0.0310574	101.28	13.255	98.997																0.993306	21.7141	0.0329201	98.997	14332000
PF3D7_0806300	1435	1435	PF3D7_0806300	ferlin-like protein, putative	>PF3D7_0806300 organism=Plasmodium_falciparum_3D7 product=ferlin, putative location=Pf3D7_08_v3:337902-343254(-) length=1704 sequence_SO=chromosome SO=protein_coding	1	K	IGYTYIDMEDRYFNQKIRQLMIDDLMPIELR	5			1	YFNQK(1)IR	FALSE	YFNQK(92.69)IR	2	0.12664	92.6925	0.0352418	92.692	36.182	92.692																1	92.6925	0.0352418	92.692
PF3D7_0806500	620	620	PF3D7_0806500	DnaJ protein, putative	>PF3D7_0806500 organism=Plasmodium_falciparum_3D7 product=DnaJ protein, putative location=Pf3D7_08_v3:345427-347454(-) length=675 sequence_SO=chromosome SO=protein_coding	1	K	EDVNIETRLKRAEGMKFLGKLMQKWSKIKND	5	......K..G...	motif9	0.999532	AEGMK(1)FLGK	FALSE	AEGMK(33.3)FLGK(-33.3)	2	-0.68889	33.2999	0.0241836	74.464	60.462	66.299																0.999532	33.2999	0.0347018	66.299	17626000
PF3D7_0806800	265	265	PF3D7_0806800	V-type proton ATPase subunit a, putative	>PF3D7_0806800 organism=Plasmodium_falciparum_3D7 product=vacuolar proton translocating ATPase subunit A, putative location=Pf3D7_08_v3:363260-366421(-) length=1053 sequence_SO=chromosome SO=protein_coding	1	K	ELESLKSAGDTNNMYKNNKQHDTFSDKLDGK	10			0.973965	SAGDTNNMYK(0.974)NNK(0.026)	FALSE	SAGDTNNMYK(15.73)NNK(-15.73)	2	-0.72434	15.7298	0.000104835	136.5	110.88	136.5											0.973965	15.7298	0.000104835	136.5	22239000
PF3D7_0807300	119	119	PF3D7_0807300	ras-related protein Rab-18	>PF3D7_0807300 organism=Plasmodium_falciparum_3D7 product=ras-related protein Rab-18 (RAB18) location=Pf3D7_08_v3:381564-382847(+) length=201 sequence_SO=chromosome SO=protein_coding	1	K	WINEIDKYSTNKNAIKMLVANKIDKPNHEVT	4	....A.K......	motif10	0.999992	NAIK(1)MLVANK	FALSE	NAIK(51.09)MLVANK(-51.09)	2	-0.40712	51.0916	0.00256034	101.9	62.048	101.9																0.999992	51.0916	0.00256034	101.9	8950200
PF3D7_0807300	110	110	PF3D7_0807300	ras-related protein Rab-18	>PF3D7_0807300 organism=Plasmodium_falciparum_3D7 product=ras-related protein Rab-18 (RAB18) location=Pf3D7_08_v3:381564-382847(+) length=201 sequence_SO=chromosome SO=protein_coding	1	K	RESFENLDVWINEIDKYSTNKNAIKMLVANK	15			0.893322	ESFENLDVWINEIDK(0.893)YSTNK(0.107)	FALSE	ESFENLDVWINEIDK(9.23)YSTNK(-9.23)	3	-0.18172	9.22935	0.00013085	48.616	43.088	48.616																0.893322	9.22935	0.00013085	48.616	20994000
PF3D7_0807300	6	6	PF3D7_0807300	ras-related protein Rab-18	>PF3D7_0807300 organism=Plasmodium_falciparum_3D7 product=ras-related protein Rab-18 (RAB18) location=Pf3D7_08_v3:381564-382847(+) length=201 sequence_SO=chromosome SO=protein_coding	1	K	__________MKNKNKYDYLLKLLLVGDSSV	4			0.842178	NK(0.158)NK(0.842)YDYLLK	FALSE	NK(-7.28)NK(7.28)YDYLLK(-37.34)	3	0.43435	7.27663	0.0168483	48.981	22.918	48.981																0.842178	7.27663	0.0168483	48.981	4859200
PF3D7_0807300	115	115	PF3D7_0807300	ras-related protein Rab-18	>PF3D7_0807300 organism=Plasmodium_falciparum_3D7 product=ras-related protein Rab-18 (RAB18) location=Pf3D7_08_v3:381564-382847(+) length=201 sequence_SO=chromosome SO=protein_coding	1	K	NLDVWINEIDKYSTNKNAIKMLVANKIDKPN	5	......K.A....	motif1	0.999924	YSTNK(1)NAIK	FALSE	YSTNK(41.17)NAIK(-41.17)	2	0.24575	41.1725	0.00923667	97.431	19.699	97.431											0.999924	41.1725	0.00923667	97.431	7915400	0.976644	16.2134	0.0403394	63.816	14149000
PF3D7_0807800	100	100	PF3D7_0807800	26S proteasome regulatory subunit RPN10, putative	>PF3D7_0807800 organism=Plasmodium_falciparum_3D7 product=26S proteasome regulatory subunit RPN10, putative (RPN10) location=Pf3D7_08_v3:399591-401360(-) length=481 sequence_SO=chromosome SO=protein_coding	1	K	TCDIIRSLLIAQLALKHRVDKNLDQKIILFI	10	....A.K......	motif10	1	SLLIAQLALK(1)HR	FALSE	SLLIAQLALK(99.28)HR	3	-0.034944	99.2826	6.0852e-05	99.283	91.417	99.283																1	99.2826	6.0852e-05	99.283	5924700
PF3D7_0807800	81	81	PF3D7_0807800	26S proteasome regulatory subunit RPN10, putative	>PF3D7_0807800 organism=Plasmodium_falciparum_3D7 product=26S proteasome regulatory subunit RPN10, putative (RPN10) location=Pf3D7_08_v3:399591-401360(-) length=481 sequence_SO=chromosome SO=protein_coding	1	K	LTNDIGQLLSCIHDIKLDGTCDIIRSLLIAQ	18	......K..G...	motif9	1	VSLTNDIGQLLSCIHDIK(1)LDGTCDIIR	FALSE	VSLTNDIGQLLSCIHDIK(55.16)LDGTCDIIR	4	0.77719	55.1582	2.93583e-08	55.158	51.698	55.158																1	55.1582	2.93583e-08	55.158	23429000
PF3D7_0807800	105	105	PF3D7_0807800	26S proteasome regulatory subunit RPN10, putative	>PF3D7_0807800 organism=Plasmodium_falciparum_3D7 product=26S proteasome regulatory subunit RPN10, putative (RPN10) location=Pf3D7_08_v3:399591-401360(-) length=481 sequence_SO=chromosome SO=protein_coding	1	K	RSLLIAQLALKHRVDKNLDQKIILFIGSPFH	3			0.999989	VDK(1)NLDQK	FALSE	VDK(49.64)NLDQK(-49.64)	2	0.11846	49.6392	0.027413	91.069	19.377	91.069																0.999989	49.6392	0.027413	91.069	2180400
PF3D7_0808300	109	109	PF3D7_0808300	ubiquitin regulatory protein, putative	>PF3D7_0808300 organism=Plasmodium_falciparum_3D7 product=ubiquitin regulatory protein, putative location=Pf3D7_08_v3:421493-422640(+) length=238 sequence_SO=chromosome SO=protein_coding	1	K	EFASKDKTMNVAIKDKSNQIYTKKKTKEQEL	2	..A...K......	motif11	1	DK(1)SNQIYTK	FALSE	DK(105.08)SNQIYTK(-105.08)	2	0.52473	105.082	0.00196773	139.39	65.729	117.7						1	105.082	0.00196773	139.39	36052000						1	83.2134	0.00766296	100.69	25055000
PF3D7_0808300	93	93	PF3D7_0808300	ubiquitin regulatory protein, putative	>PF3D7_0808300 organism=Plasmodium_falciparum_3D7 product=ubiquitin regulatory protein, putative location=Pf3D7_08_v3:421493-422640(+) length=238 sequence_SO=chromosome SO=protein_coding	1	K	ENKKFMANIEAGILPKEFASKDKTMNVAIKD	12	......K..A...	motif6	0.974938	FMANIEAGILPK(0.975)EFASK(0.025)	FALSE	FMANIEAGILPK(15.9)EFASK(-15.9)	3	0.10056	15.8997	0.000297681	44.998	41.553	44.998																0.974938	15.8997	0.000297681	44.998	13189000
PF3D7_0808300	61	61	PF3D7_0808300	ubiquitin regulatory protein, putative	>PF3D7_0808300 organism=Plasmodium_falciparum_3D7 product=ubiquitin regulatory protein, putative location=Pf3D7_08_v3:421493-422640(+) length=238 sequence_SO=chromosome SO=protein_coding	1	K	FKSKLPENCRHITLYKNGFIVDDGEFRDLEI	6			1	HITLYK(1)NGFIVDDGEFR	FALSE	HITLYK(45.62)NGFIVDDGEFR	3	0.14689	45.6175	3.73084e-07	53.998	51.171	45.618																1	45.6175	3.73084e-07	53.998	7001500
PF3D7_0810300	396	396	PF3D7_0810300	protein phosphatase PPM5, putative	>PF3D7_0810300 organism=Plasmodium_falciparum_3D7 product=protein phosphatase PPM5, putative (PPM5) location=Pf3D7_08_v3:525058-527604(-) length=550 sequence_SO=chromosome SO=protein_coding	1	K	VGDSRAVLGKRKNGSKQLSAVELTKDHKPNC	4			1	NGSK(1)QLSAVELTK	FALSE	NGSK(98.43)QLSAVELTK(-98.43)	2	-0.56125	98.4339	0.000123807	123.36	82.2	123.36																1	98.4339	0.000123807	123.36	25756000
PF3D7_0810300	194	194	PF3D7_0810300	protein phosphatase PPM5, putative	>PF3D7_0810300 organism=Plasmodium_falciparum_3D7 product=protein phosphatase PPM5, putative (PPM5) location=Pf3D7_08_v3:525058-527604(-) length=550 sequence_SO=chromosome SO=protein_coding	1	K	QKELPYMIIKNENFLKNPKEVFTKAFLNIHE	6			0.978247	NENFLK(0.978)NPK(0.022)	FALSE	NENFLK(16.83)NPK(-16.83)	2	1.1466	16.831	0.0161218	67.897	32.452	67.897																0.978247	16.831	0.0161218	67.897
PF3D7_0811000	775	775	PF3D7_0811000	cullin-1, putative	>PF3D7_0811000 organism=Plasmodium_falciparum_3D7 product=cullin-1, putative (CUL1) location=Pf3D7_08_v3:554437-557205(+) length=829 sequence_SO=chromosome SO=protein_coding	1	K	EDRTMAIEAAIVRVMKMHKKLFYDQIFDYVK	3	A.....K......	motif8	0.99998	VMK(1)MHKK	FALSE	VMK(47.03)MHK(-47.03)K(-73.62)	2	-0.10565	47.0323	0.0194885	100.74	60.018	100.74	0.996966	25.5626	0.0266812	52.683	10502000	0.99987	38.857	0.0221221	60.788	169040000	0.999873	38.9664	0.0276773	58.661	11859000	0.99998	47.0323	0.0194885	100.74	176280000
PF3D7_0812400	495	495	PF3D7_0812400	karyopherin alpha	>PF3D7_0812400 organism=Plasmodium_falciparum_3D7 product=karyopherin alpha (KARalpha) location=Pf3D7_08_v3:621805-623442(-) length=545 sequence_SO=chromosome SO=protein_coding	1	K	EECDSVHKIDALQDRKVDNICNKAWKILYKY	1	.A....K......	motif11	1	K(1)VDNICNK	FALSE	K(83.48)VDNICNK(-83.48)	2	0.60058	83.4772	0.00820571	115.71	24.396	100.02						1	83.4772	0.0122404	100.02	3766500	1	88.4547	0.0114447	101.72	4074600	1	97.2747	0.00820571	115.71	27886000
PF3D7_0812400	42	42	PF3D7_0812400	karyopherin alpha	>PF3D7_0812400 organism=Plasmodium_falciparum_3D7 product=karyopherin alpha (KARalpha) location=Pf3D7_08_v3:621805-623442(-) length=545 sequence_SO=chromosome SO=protein_coding	1	K	VVQIRKQQRECQLESKRAMVMANIGFEENNT	7	......K.A....	motif1	1	ECQLESK(1)R	FALSE	ECQLESK(129.72)R	2	0.057681	129.722	0.00323845	144.09	83.083	129.72																1	129.722	0.00323845	144.09	30232000
PF3D7_0812500	204	204	PF3D7_0812500	RNA-binding protein, putative	>PF3D7_0812500 organism=Plasmodium_falciparum_3D7 product=RNA-binding protein, putative location=Pf3D7_08_v3:626069-628945(-) length=958 sequence_SO=chromosome SO=protein_coding	1	K	EEEDLKIIFSRFGNIKSCKIIKDKVTNNSLQ	5			0.99623	FGNIK(0.996)SCK(0.004)	FALSE	FGNIK(24.22)SCK(-24.22)	2	0.58961	24.2207	0.0294615	87.639	42.947	87.639						0.99623	24.2207	0.0294615	87.639	4684300
PF3D7_0813100	289	289	PF3D7_0813100	conserved Plasmodium protein, unknown function	>PF3D7_0813100 organism=Plasmodium_falciparum_3D7 product=conserved Plasmodium protein, unknown function location=Pf3D7_08_v3:647316-649304(-) length=662 sequence_SO=chromosome SO=protein_coding	1	K	EENGYYYEQDMKNYNKENNYEYDETKKYNNN	4			0.999779	NYNK(1)ENNYEYDETKK	FALSE	NYNK(39)ENNYEYDETK(-39)K(-40.24)	3	0.022672	38.9978	0.00192362	45.614	38.998	45.614																0.999779	38.9978	0.00192362	45.614	9447500
PF3D7_0813300	137	137	PF3D7_0813300	conserved protein, unknown function	>PF3D7_0813300 organism=Plasmodium_falciparum_3D7 product=conserved Plasmodium protein, unknown function location=Pf3D7_08_v3:656078-657630(+) length=315 sequence_SO=chromosome SO=protein_coding	1	K	TKKNTLKNSLSNGISKRKKNLENNEDDETNV	9			1	NSLSNGISK(1)R	FALSE	NSLSNGISK(152.27)R	2	-0.44752	152.272	2.20596e-05	169.93	60.645	152.27						1	152.272	2.27E-05	169.65							1	164.663	2.20596e-05	169.93	16846000
PF3D7_0813900	71	71	PF3D7_0813900	40S ribosomal protein S16, putative	>PF3D7_0813900 organism=Plasmodium_falciparum_3D7 product=40S ribosomal protein S16, putative location=Pf3D7_08_v3:677989-678725(-) length=144 sequence_SO=chromosome SO=protein_coding	1	K	IGSGKLKNLDIRIRVKGGGQTSQIYAIRQAI	2	......K..G...	motif9	1	VK(1)GGGQTSQIYAIR	FALSE	VK(53.14)GGGQTSQIYAIR	3	-0.72533	53.1362	0.000726074	53.136	40.33	53.136											1	53.1362	0.000726074	53.136	5938700
PF3D7_0814000	110	110	PF3D7_0814000	60S ribosomal protein L13-2, putative	>PF3D7_0814000 organism=Plasmodium_falciparum_3D7 product=60S ribosomal protein L13-2, putative location=Pf3D7_08_v3:680957-681809(+) length=215 sequence_SO=chromosome SO=protein_coding	1	K	CYDKRRKNRSEESLTKNVERLLKYKNSLVMI	7			1	SEESLTK(1)NVER	FALSE	SEESLTK(108.35)NVER	2	-0.57652	108.348	0.000150244	135.99	92.307	108.35						1	108.348	0.000150244	108.35							1	124.423	0.000365085	135.99	17069000
PF3D7_0814200	43	43	PF3D7_0814200	DNA/RNA-binding protein Alba 1	>PF3D7_0814200 organism=Plasmodium_falciparum_3D7 product=DNA/RNA-binding protein Alba 1 (ALBA1) location=Pf3D7_08_v3:687340-688086(+) length=248 sequence_SO=chromosome SO=protein_coding	1	K	GAKILGDEDKKSIKIKATGNAIGKAVTLAEI	2	......KA.....	motif3	0.999999	IK(1)ATGNAIGK	FALSE	IK(62.9)ATGNAIGK(-62.9)	2	-0.12349	62.9038	0.0237893	64.906	25.26	64.906																0.999999	62.9038	0.0237893	64.906	16565000
PF3D7_0814200	112	112	PF3D7_0814200	DNA/RNA-binding protein Alba 1	>PF3D7_0814200 organism=Plasmodium_falciparum_3D7 product=DNA/RNA-binding protein Alba 1 (ALBA1) location=Pf3D7_08_v3:687340-688086(+) length=248 sequence_SO=chromosome SO=protein_coding	1	K	VSFIEILLSREQLDMKDAGYQPPLDEKYVKE	6	......K.A....	motif1	0.999991	EQLDMK(1)DAGYQPPLDEK	FALSE	EQLDMK(50.44)DAGYQPPLDEK(-50.44)	3	-0.73939	50.4361	1.77629e-05	62.813	53.531	62.813											0.999783	36.6313	0.00114973	40.493	7737300	0.999991	50.4361	1.77629e-05	62.813	7937500
PF3D7_0814500	534	534	PF3D7_0814500	conserved protein, unknown function	>PF3D7_0814500 organism=Plasmodium_falciparum_3D7 product=conserved Plasmodium protein, unknown function location=Pf3D7_08_v3:700376-702652(+) length=758 sequence_SO=chromosome SO=protein_coding	1	K	NKDNKIYSSNDYKSNKQDNYYDRIGGLVENG	3			1	SNK(1)QDNYYDR	FALSE	SNK(68.54)QDNYYDR	2	-0.44176	68.5357	0.0169779	70.942	52.317	68.536	1	68.5357	0.0169779	70.942	10468000
PF3D7_0815200	320	320	PF3D7_0815200	importin subunit beta, putative	>PF3D7_0815200 organism=Plasmodium_falciparum_3D7 product=importin beta, putative location=Pf3D7_08_v3:717113-719746(+) length=877 sequence_SO=chromosome SO=protein_coding	2	K	DQYELQEGKKNHNIVKQAMVFLLPKIFNAMI	7	......K.A....	motif1	1	K(1)NHNIVK(1)	TRUE	K(85.89)NHNIVK(85.89)	3	0.14561	85.8899	0.00711874	85.89	17.666	85.89																1	85.8899	0.00711874	85.89	11752000
PF3D7_0815200	314	314	PF3D7_0815200	importin subunit beta, putative	>PF3D7_0815200 organism=Plasmodium_falciparum_3D7 product=importin beta, putative location=Pf3D7_08_v3:717113-719746(+) length=877 sequence_SO=chromosome SO=protein_coding	2	K	EEETFIDQYELQEGKKNHNIVKQAMVFLLPK	1			1	K(1)NHNIVK(1)	TRUE	K(85.89)NHNIVK(85.89)	3	0.14561	85.8899	0.00711874	85.89	17.666	85.89																1	85.8899	0.00711874	85.89	11752000
PF3D7_0817500	43	43	PF3D7_0817500	histidine triad nucleotide-binding protein 1	>PF3D7_0817500 organism=Plasmodium_falciparum_3D7 product=protein kinase c inhibitor-like protein, putative location=Pf3D7_08_v3:798777-800205(+) length=185 sequence_SO=chromosome SO=protein_coding	1	K	TNSFYSTFVKLSYKNKFMTGILTRRLAKMAD	2			1	NK(1)FMTGILTR	FALSE	NK(45.83)FMTGILTR	2	-0.00096663	45.8289	0.00211108	110.84	86.616	45.829						1	45.8289	0.0408976	54.259	3637800	1	45.4329	0.0132159	63.624		1	110.838	0.00211108	110.84	14485000
PF3D7_0817700	986	986	PF3D7_0817700	rhoptry neck protein 5	>PF3D7_0817700 organism=Plasmodium_falciparum_3D7 product=rhoptry neck protein 5 (RON5) location=Pf3D7_08_v3:805797-813465(-) length=1156 sequence_SO=chromosome SO=protein_coding	1	K	ELEILKGDGVKNIYMKGLNEDNERIYELQNN	5			1	NIYMK(1)GLNEDNER	FALSE	NIYMK(74.79)GLNEDNER	2	-1.1372	74.7892	0.000537158	89.231	65.554	74.789	1	74.7892	0.000537158	89.231	12327000
PF3D7_0817700	53	53	PF3D7_0817700	rhoptry neck protein 5	>PF3D7_0817700 organism=Plasmodium_falciparum_3D7 product=rhoptry neck protein 5 (RON5) location=Pf3D7_08_v3:805797-813465(-) length=1156 sequence_SO=chromosome SO=protein_coding	1	K	PFKKNEIKKGIDKDEKSIMKNVDSIDVMFEP	7			0.999804	GIDKDEK(1)SIMK	FALSE	GIDK(-37.94)DEK(37.94)SIMK(-44.57)	2	0.15531	37.9367	0.00602377	89.189	52.603	89.189	0.999804	37.9367	0.00602377	89.189	4464200
PF3D7_0817900	88	88	PF3D7_0817900	high mobility group protein B2	>PF3D7_0817900 organism=Plasmodium_falciparum_3D7 product=high mobility group protein B2 (HMGB2) location=Pf3D7_08_v3:816803-817102(-) length=99 sequence_SO=chromosome SO=protein_coding	1	K	APYEKKAQLDKVRYSKEIEEYRKKNQE____	3			1	YSK(1)EIEEYR	FALSE	YSK(66.06)EIEEYR	2	-0.078316	66.0557	0.00340099	105.98	74.553	66.056						1	66.0557	0.0161229	83.862	11967000						1	62.4631	0.00340099	80.688	10488000
PF3D7_0817900	51	51	PF3D7_0817900	high mobility group protein B2	>PF3D7_0817900 organism=Plasmodium_falciparum_3D7 product=high mobility group protein B2 (HMGB2) location=Pf3D7_08_v3:816803-817102(-) length=99 sequence_SO=chromosome SO=protein_coding	1	K	KDKRLEIIKEKPELAKDVAQVGKLIGEAWGQ	7	.....AK......	motif5	0.999997	EKPELAK(1)DVAQVGK	FALSE	EK(-57.15)PELAK(57.15)DVAQVGK(-59.66)	3	0.034295	57.1454	3.01261e-05	94.09	78.149	94.09						0.999989	51.9668	4.86E-05	81.904	57476000						0.999997	57.1454	3.01261e-05	94.09	143370000
PF3D7_0817900	44	44	PF3D7_0817900	high mobility group protein B2	>PF3D7_0817900 organism=Plasmodium_falciparum_3D7 product=high mobility group protein B2 (HMGB2) location=Pf3D7_08_v3:816803-817102(-) length=99 sequence_SO=chromosome SO=protein_coding	1	K	SAYMFYVKDKRLEIIKEKPELAKDVAQVGKL	6	......K.....A	motif2	0.998581	RLEIIK(0.999)EK(0.001)PELAK	FALSE	RLEIIK(28.48)EK(-28.48)PELAK(-58.95)	4	-0.25849	28.4775	4.42708e-05	118.87	79.85	77.776																0.998581	28.4775	4.42708e-05	118.87	74883000
PF3D7_0817900	72	72	PF3D7_0817900	high mobility group protein B2	>PF3D7_0817900 organism=Plasmodium_falciparum_3D7 product=high mobility group protein B2 (HMGB2) location=Pf3D7_08_v3:816803-817102(-) length=99 sequence_SO=chromosome SO=protein_coding	1	K	GKLIGEAWGQLSPAQKAPYEKKAQLDKVRYS	14	......KA.....	motif3	0.948273	LIGEAWGQLSPAQK(0.948)APYEK(0.052)	FALSE	LIGEAWGQLSPAQK(12.63)APYEK(-12.63)	3	0.57027	12.6322	2.63438e-06	62.556	54.066	62.556																0.948273	12.6322	2.63438e-06	62.556	7010900
PF3D7_0817900	46	46	PF3D7_0817900	high mobility group protein B2	>PF3D7_0817900 organism=Plasmodium_falciparum_3D7 product=high mobility group protein B2 (HMGB2) location=Pf3D7_08_v3:816803-817102(-) length=99 sequence_SO=chromosome SO=protein_coding	1	K	YMFYVKDKRLEIIKEKPELAKDVAQVGKLIG	2			0.999988	EK(1)PELAKDVAQVGK	FALSE	EK(49.24)PELAK(-49.24)DVAQVGK(-78.71)	3	1.0377	49.2416	5.0161e-05	80.905	60.475	80.905																0.999988	49.2416	5.0161e-05	80.905	30005000
PF3D7_0817900	58	58	PF3D7_0817900	high mobility group protein B2	>PF3D7_0817900 organism=Plasmodium_falciparum_3D7 product=high mobility group protein B2 (HMGB2) location=Pf3D7_08_v3:816803-817102(-) length=99 sequence_SO=chromosome SO=protein_coding	1	K	IKEKPELAKDVAQVGKLIGEAWGQLSPAQKA	7	.....GK......	motif4	0.999974	DVAQVGK(1)LIGEAWGQLSPAQK	FALSE	DVAQVGK(45.78)LIGEAWGQLSPAQK(-45.78)	3	0.40064	45.7773	3.03006e-05	53.033	49.6	53.033																0.999974	45.7773	3.03006e-05	53.033	11361000
PF3D7_0817900	83	83	PF3D7_0817900	high mobility group protein B2	>PF3D7_0817900 organism=Plasmodium_falciparum_3D7 product=high mobility group protein B2 (HMGB2) location=Pf3D7_08_v3:816803-817102(-) length=99 sequence_SO=chromosome SO=protein_coding	1	K	SPAQKAPYEKKAQLDKVRYSKEIEEYRKKNQ	6	..A...K......	motif11	0.954095	K(0.046)AQLDK(0.954)VR	FALSE	K(-13.18)AQLDK(13.18)VR	3	-0.10083	13.1774	0.0233353	56.378	7.5913	52.482																0.954095	13.1774	0.0233353	56.378	14696000
PF3D7_0818200	62	62	PF3D7_0818200	14-3-3 protein	>PF3D7_0818200 organism=Plasmodium_falciparum_3D7 product=14-3-3 protein (14-3-3I) location=Pf3D7_08_v3:830006-831454(+) length=262 sequence_SO=chromosome SO=protein_coding	1	K	DELTVEERNLLSVAYKNAVGARRASWRIISS	8	......K.A....	motif1	1	NLLSVAYK(1)NAVGAR	FALSE	NLLSVAYK(44.51)NAVGAR	3	2.2659	44.5108	2.09611e-05	116.51	79.331	44.511																1	116.511	2.09611e-05	116.51	6646400
PF3D7_0818200	8	8	PF3D7_0818200	14-3-3 protein	>PF3D7_0818200 organism=Plasmodium_falciparum_3D7 product=14-3-3 protein (14-3-3I) location=Pf3D7_08_v3:830006-831454(+) length=262 sequence_SO=chromosome SO=protein_coding	1	K	________MATSEELKQLRCDCTYRSKLAEQ	7	A.....K......	motif8	1	ATSEELK(1)QLR	FALSE	ATSEELK(163.16)QLR	2	-0.13981	163.16	1.05442e-05	163.16	72.254	163.16																1	163.16	1.05442e-05	163.16	4159200
PF3D7_0818200	130	130	PF3D7_0818200	14-3-3 protein	>PF3D7_0818200 organism=Plasmodium_falciparum_3D7 product=14-3-3 protein (14-3-3I) location=Pf3D7_08_v3:830006-831454(+) length=262 sequence_SO=chromosome SO=protein_coding	1	K	LLTKKLIPNTSESESKVFYYKMKGDYYRYIS	11			0.999802	LIPNTSESESK(1)VFYYK	FALSE	LIPNTSESESK(37.04)VFYYK(-37.04)	3	-0.15719	37.0374	1.19419e-07	101.78	75.805	82.651																0.999802	37.0374	1.10026e-06	82.651	13569000
PF3D7_0818200	255	255	PF3D7_0818200	14-3-3 protein	>PF3D7_0818200 organism=Plasmodium_falciparum_3D7 product=14-3-3 protein (14-3-3I) location=Pf3D7_08_v3:830006-831454(+) length=262 sequence_SO=chromosome SO=protein_coding	1	K	LTLWTSDLQGDQTEEKSKDEGLE________	18			0.958879	DNLTLWTSDLQGDQTEEK(0.959)SK(0.041)DEGLE	FALSE	DNLTLWTSDLQGDQTEEK(13.68)SK(-13.68)DEGLE	3	0.19595	13.677	7.67412e-44	149.32	134.27	149.32																0.958879	13.677	7.67412e-44	149.32	43202000
PF3D7_0818200	85	85	PF3D7_0818200	14-3-3 protein	>PF3D7_0818200 organism=Plasmodium_falciparum_3D7 product=14-3-3 protein (14-3-3I) location=Pf3D7_08_v3:830006-831454(+) length=262 sequence_SO=chromosome SO=protein_coding	1	K	ASWRIISSVEQKEMSKANVHNKNVAATYRKK	4	......KA.....	motif3	0.99991	EMSK(1)ANVHNK	FALSE	EMSK(40.47)ANVHNK(-40.47)	3	0.35889	40.4702	0.00244255	62.463	44.238	62.463																0.99991	40.4702	0.00244255	62.463	10750000
PF3D7_0818200	91	91	PF3D7_0818200	14-3-3 protein	>PF3D7_0818200 organism=Plasmodium_falciparum_3D7 product=14-3-3 protein (14-3-3I) location=Pf3D7_08_v3:830006-831454(+) length=262 sequence_SO=chromosome SO=protein_coding	1	K	SSVEQKEMSKANVHNKNVAATYRKKVEEELN	6	......K..A...	motif6	1	ANVHNK(1)NVAATYR	FALSE	ANVHNK(47.61)NVAATYR	3	1.3266	47.6064	0.00199319	47.606	37.602	47.606																1	47.6064	0.00199319	47.606	9333000
PF3D7_0818500	145	145	PF3D7_0818500	zinc finger protein, putative	>PF3D7_0818500 organism=Plasmodium_falciparum_3D7 product=zinc finger protein, putative location=Pf3D7_08_v3:842317-843215(+) length=191 sequence_SO=chromosome SO=protein_coding	1	K	SKCFFCSKRIGLVGIKCRCNHYFCSLHRYAD	7			1	IGLVGIK(1)CR	FALSE	IGLVGIK(43.08)CR	3	-0.40634	43.0829	0.0129393	43.083	43.083	43.083																1	43.0829	0.0129393	43.083	1277500
PF3D7_0818900	602	602	PF3D7_0818900	heat shock protein 70	>PF3D7_0818900 organism=Plasmodium_falciparum_3D7 product=heat shock protein 70 (HSP70) location=Pf3D7_08_v3:860384-862417(+) length=677 sequence_SO=chromosome SO=protein_coding	1	K	ITTILEWLEKNQLAGKDEYEAKQKEAESVCA	6	.....GK......	motif4	1	NQLAGK(1)DEYEAK	FALSE	NQLAGK(72.79)DEYEAK(-72.79)	2	-0.36178	72.7922	4.52706e-05	147.24	105.54	129.34						1	67.5373	0.00011067	127.17	18008000						1	74.9495	4.52706e-05	117.79	109790000
PF3D7_0818900	437	437	PF3D7_0818900	heat shock protein 70	>PF3D7_0818900 organism=Plasmodium_falciparum_3D7 product=heat shock protein 70 (HSP70) location=Pf3D7_08_v3:860384-862417(+) length=677 sequence_SO=chromosome SO=protein_coding	1	K	VMTKLIERNTTIPAKKSQIFTTYADNQPGVL	1	......K.Q....	motif7	1	K(1)SQIFTTYADNQPGVLIQVYEGER	FALSE	K(43.24)SQIFTTYADNQPGVLIQVYEGER	3	-0.32312	43.2407	2.96863e-06	62.546	41.987	43.241						0.593076	1.63597	0.0431303	62.546	82046000						1	51.3012	2.96863e-06	62.546	168250000
PF3D7_0818900	471	471	PF3D7_0818900	heat shock protein 70	>PF3D7_0818900 organism=Plasmodium_falciparum_3D7 product=heat shock protein 70 (HSP70) location=Pf3D7_08_v3:860384-862417(+) length=677 sequence_SO=chromosome SO=protein_coding	1	K	YEGERALTKDNNLLGKFHLDGIPPAPRKVPQ	7	.....GK......	motif4	1	DNNLLGK(1)FHLDGIPPAPR	FALSE	DNNLLGK(51.09)FHLDGIPPAPR	3	0.2747	51.0887	1.13238e-20	126.63	87.895	51.089						1	51.0887	0.00159174	51.089	5512100	1	43.2084	0.000108779	51.798	5372700	1	73.9284	1.13238e-20	126.63	112090000
PF3D7_0818900	610	610	PF3D7_0818900	heat shock protein 70	>PF3D7_0818900 organism=Plasmodium_falciparum_3D7 product=heat shock protein 70 (HSP70) location=Pf3D7_08_v3:860384-862417(+) length=677 sequence_SO=chromosome SO=protein_coding	1	K	EKNQLAGKDEYEAKQKEAESVCAPIMSKIYQ	2	......K.A....	motif1	1	QK(1)EAESVCAPIMSK	FALSE	QK(101.2)EAESVCAPIMSK(-101.2)	2	-0.88322	101.203	2.97156e-06	123.29	96.028	101.2																1	101.203	2.97156e-06	123.29	36782000
PF3D7_0818900	520	520	PF3D7_0818900	heat shock protein 70	>PF3D7_0818900 organism=Plasmodium_falciparum_3D7 product=heat shock protein 70 (HSP70) location=Pf3D7_08_v3:860384-862417(+) length=677 sequence_SO=chromosome SO=protein_coding	1	K	EKSTGKQNHITITNDKGRLSQDEIDRMVNDA	14			1	STGKQNHITITNDK(1)GR	FALSE	STGK(-76.78)QNHITITNDK(76.78)GR	3	-0.90487	76.7764	3.95894e-09	172.11	147.86	104.21	1	42.475	1.60E-05	147.24	262460000	1	104.593	4.10E-05	140.14	344390000	1	108.716	4.34535e-05	148.18	163610000	1	76.7764	3.95894e-09	172.11	3302500000
PF3D7_0818900	574	574	PF3D7_0818900	heat shock protein 70	>PF3D7_0818900 organism=Plasmodium_falciparum_3D7 product=heat shock protein 70 (HSP70) location=Pf3D7_08_v3:860384-862417(+) length=677 sequence_SO=chromosome SO=protein_coding	1	K	CYGVKSSLEDQKIKEKLQPAEIETCMKTITT	2	......K.Q....	motif7	1	EK(1)LQPAEIETCMK	FALSE	EK(96.15)LQPAEIETCMK(-96.15)	2	0.23777	96.1465	4.55559e-06	115.12	71.358	97.69																1	96.1465	4.55559e-06	97.69	4288300
PF3D7_0818900	342	342	PF3D7_0818900	heat shock protein 70	>PF3D7_0818900 organism=Plasmodium_falciparum_3D7 product=heat shock protein 70 (HSP70) location=Pf3D7_08_v3:860384-862417(+) length=677 sequence_SO=chromosome SO=protein_coding	1	K	LIPVEKVLKDAMMDKKSVHEVVLVGGSTRIP	1	.A....K......	motif11	1	K(1)SVHEVVLVGGSTR	FALSE	K(47.34)SVHEVVLVGGSTR	3	0.2103	47.3446	5.99381e-05	84.41	69.248	47.345											1	47.3446	0.00155323	47.345	10384000	1	70.6543	5.99381e-05	84.41	101150000
PF3D7_0818900	358	358	PF3D7_0818900	heat shock protein 70	>PF3D7_0818900 organism=Plasmodium_falciparum_3D7 product=heat shock protein 70 (HSP70) location=Pf3D7_08_v3:860384-862417(+) length=677 sequence_SO=chromosome SO=protein_coding	1	K	SVHEVVLVGGSTRIPKIQTLIKEFFNGKEAC	3	......K.Q....	motif7	1	IPK(1)IQTLIK	FALSE	IPK(80.33)IQTLIK(-80.33)	2	0.6986	80.3318	0.00031793	139.43	71.729	92.538						1	80.3318	0.0116067	92.538	9217100	1	79.3928	0.00031793	109.66	10396000	1	124.495	0.00218544	139.43	102090000
PF3D7_0818900	464	464	PF3D7_0818900	heat shock protein 70	>PF3D7_0818900 organism=Plasmodium_falciparum_3D7 product=heat shock protein 70 (HSP70) location=Pf3D7_08_v3:860384-862417(+) length=677 sequence_SO=chromosome SO=protein_coding	1	K	PGVLIQVYEGERALTKDNNLLGKFHLDGIPP	4			1	ALTK(1)DNNLLGK	FALSE	ALTK(86.58)DNNLLGK(-86.58)	2	-0.19908	86.5827	1.46376e-05	163.9	104.89	152.64	1	78.9851	0.00120819	129.88	166630000	1	86.5827	0.000290709	152.64	542640000	1	87.7776	0.000145033	154.05	154210000	1	100.274	1.46376e-05	163.9	1679300000
PF3D7_0818900	370	370	PF3D7_0818900	heat shock protein 70	>PF3D7_0818900 organism=Plasmodium_falciparum_3D7 product=heat shock protein 70 (HSP70) location=Pf3D7_08_v3:860384-862417(+) length=677 sequence_SO=chromosome SO=protein_coding	1	K	RIPKIQTLIKEFFNGKEACRSINPDEAVAYG	6	......K.A....	motif1	1	EFFNGK(1)EACR	FALSE	EFFNGK(105.2)EACR	2	0.297	105.195	0.00202342	105.2	89.566	105.2																1	105.195	0.00202342	105.2
PF3D7_0818900	268	268	PF3D7_0818900	heat shock protein 70	>PF3D7_0818900 organism=Plasmodium_falciparum_3D7 product=heat shock protein 70 (HSP70) location=Pf3D7_08_v3:860384-862417(+) length=677 sequence_SO=chromosome SO=protein_coding	1	K	CVEDFKRKNRGKDLSKNSRALRRLRTQCERA	6			1	GKDLSK(1)NSR	FALSE	GK(-126.17)DLSK(126.17)NSR	2	-1.1487	126.171	0.00770509	151.22	36.248	151.22																1	126.171	0.00770509	151.22	72432000
PF3D7_0818900	149	149	PF3D7_0818900	heat shock protein 70	>PF3D7_0818900 organism=Plasmodium_falciparum_3D7 product=heat shock protein 70 (HSP70) location=Pf3D7_08_v3:860384-862417(+) length=677 sequence_SO=chromosome SO=protein_coding	1	K	MVLQKMKENAEAFLGKSIKNAVITVPAYFND	11	.....GK......	motif4	0.968229	MKENAEAFLGK(0.968)SIK(0.032)	FALSE	MK(-35.54)ENAEAFLGK(14.88)SIK(-14.88)	3	-0.66252	14.8766	0.00488968	44.426	28.203	40.242																0.968229	14.8766	0.00488968	43.177
PF3D7_0818900	608	608	PF3D7_0818900	heat shock protein 70	>PF3D7_0818900 organism=Plasmodium_falciparum_3D7 product=heat shock protein 70 (HSP70) location=Pf3D7_08_v3:860384-862417(+) length=677 sequence_SO=chromosome SO=protein_coding	1	K	WLEKNQLAGKDEYEAKQKEAESVCAPIMSKI	12	.....AK......	motif5	0.980552	NQLAGKDEYEAK(0.981)QK(0.019)	FALSE	NQLAGK(-68.8)DEYEAK(17.03)QK(-17.03)	3	-0.40344	17.026	1.33965e-09	160.48	124.82	111.12																0.980552	17.026	1.33965e-09	160.48	131650000
PF3D7_0818900	539	539	PF3D7_0818900	heat shock protein 70	>PF3D7_0818900 organism=Plasmodium_falciparum_3D7 product=heat shock protein 70 (HSP70) location=Pf3D7_08_v3:860384-862417(+) length=677 sequence_SO=chromosome SO=protein_coding	1	K	SQDEIDRMVNDAEKYKAEDEENRKRIEARNS	2	......KA.....	motif3	1	YK(1)AEDEENRKR	FALSE	YK(77.68)AEDEENRK(-77.68)R	2	-0.14673	77.6807	2.45555e-06	91.355	84.405	85.813																1	77.6807	2.45555e-06	91.355	23491000
PF3D7_0818900	570	570	PF3D7_0818900	heat shock protein 70	>PF3D7_0818900 organism=Plasmodium_falciparum_3D7 product=heat shock protein 70 (HSP70) location=Pf3D7_08_v3:860384-862417(+) length=677 sequence_SO=chromosome SO=protein_coding	1	K	LENYCYGVKSSLEDQKIKEKLQPAEIETCMK	7			1	SSLEDQK(1)IKEK	FALSE	SSLEDQK(64.5)IK(-64.5)EK(-122.42)	2	0.26744	64.504	8.82682e-49	264.3	181.47	264.3	0.998332	27.7725	0.00454651	124.38	9859800	0.999231	31.1398	1.48E-05	166.24	120930000	0.967857	14.8234	0.00168206	78.287	16586000	1	64.504	8.82682e-49	264.3	1148100000
PF3D7_0818900	510	510	PF3D7_0818900	heat shock protein 70	>PF3D7_0818900 organism=Plasmodium_falciparum_3D7 product=heat shock protein 70 (HSP70) location=Pf3D7_08_v3:860384-862417(+) length=677 sequence_SO=chromosome SO=protein_coding	1	K	ANGILNVTAVEKSTGKQNHITITNDKGRLSQ	4	.....GK......	motif4	1	STGK(1)QNHITITNDK	FALSE	STGK(120.14)QNHITITNDK(-120.14)	2	0.097966	120.139	3.25568e-11	160.65	120.27	150.05	0.999613	34.1261	0.00129059	47.639	3911600						1	65.8293	3.4781e-05	90.759	6591600	1	120.139	3.25568e-11	160.65	137840000
PF3D7_0818900	335	335	PF3D7_0818900	heat shock protein 70	>PF3D7_0818900 organism=Plasmodium_falciparum_3D7 product=heat shock protein 70 (HSP70) location=Pf3D7_08_v3:860384-862417(+) length=677 sequence_SO=chromosome SO=protein_coding	1	K	IDYFRDTLIPVEKVLKDAMMDKKSVHEVVLV	3	......K.A....	motif1	0.999993	VLK(1)DAMMDK	FALSE	VLK(51.43)DAMMDK(-51.43)	2	-0.069801	51.4262	0.0166083	73.632	41.414	68.657																0.999993	51.4262	0.0166083	68.657	2970800
PF3D7_0818900	537	537	PF3D7_0818900	heat shock protein 70	>PF3D7_0818900 organism=Plasmodium_falciparum_3D7 product=heat shock protein 70 (HSP70) location=Pf3D7_08_v3:860384-862417(+) length=677 sequence_SO=chromosome SO=protein_coding	1	K	RLSQDEIDRMVNDAEKYKAEDEENRKRIEAR	7	......K..A...	motif6	0.999898	MVNDAEK(1)YKAEDEENR	FALSE	MVNDAEK(39.91)YK(-39.91)AEDEENR	3	-0.59025	39.9051	3.72422e-10	124.25	108.74	112.34																0.999898	39.9051	6.75044e-10	112.34	85933000
PF3D7_0818900	596	596	PF3D7_0818900	heat shock protein 70	>PF3D7_0818900 organism=Plasmodium_falciparum_3D7 product=heat shock protein 70 (HSP70) location=Pf3D7_08_v3:860384-862417(+) length=677 sequence_SO=chromosome SO=protein_coding	1	K	ETCMKTITTILEWLEKNQLAGKDEYEAKQKE	11	......K.Q....	motif7	0.999638	TITTILEWLEK(1)NQLAGKDEYEAK	FALSE	TITTILEWLEK(34.42)NQLAGK(-34.42)DEYEAK(-59.18)	3	0.16315	34.4226	2.99604e-37	159.46	137.56	159.46																0.999638	34.4226	2.99604e-37	159.46	112510000
PF3D7_0818900	572	572	PF3D7_0818900	heat shock protein 70	>PF3D7_0818900 organism=Plasmodium_falciparum_3D7 product=heat shock protein 70 (HSP70) location=Pf3D7_08_v3:860384-862417(+) length=677 sequence_SO=chromosome SO=protein_coding	1	K	NYCYGVKSSLEDQKIKEKLQPAEIETCMKTI	9	......K.....A	motif2	0.848575	SSLEDQK(0.15)IK(0.849)EK(0.001)	FALSE	SSLEDQK(-7.53)IK(7.53)EK(-27.69)	3	-0.46373	7.52651	7.0168e-05	110.74	53.637	110.74																0.848575	7.52651	0.00048557	110.74	472430000
PF3D7_0818900	67	67	PF3D7_0818900	heat shock protein 70	>PF3D7_0818900 organism=Plasmodium_falciparum_3D7 product=heat shock protein 70 (HSP70) location=Pf3D7_08_v3:860384-862417(+) length=677 sequence_SO=chromosome SO=protein_coding	1	K	YVAFTDTERLIGDAAKNQVARNPENTVFDAK	7	.....AK......	motif5	1	LIGDAAK(1)NQVAR	FALSE	LIGDAAK(63.62)NQVAR	3	-0.2694	63.6242	0.000199403	73.499	59.691	63.624											1	63.6242	0.000503797	64.103	16879000	1	55.8063	0.000199403	73.499	24482000
PF3D7_0818900	436	436	PF3D7_0818900	heat shock protein 70	>PF3D7_0818900 organism=Plasmodium_falciparum_3D7 product=heat shock protein 70 (HSP70) location=Pf3D7_08_v3:860384-862417(+) length=677 sequence_SO=chromosome SO=protein_coding	1	K	GVMTKLIERNTTIPAKKSQIFTTYADNQPGV	7	.....AK......	motif5	0.78163	NTTIPAK(0.782)K(0.218)	FALSE	NTTIPAK(5.54)K(-5.54)	2	0.42566	5.53807	0.0280476	72.23	48.031	72.23											0.78163	5.53807	0.0280476	72.23	32763000
PF3D7_0818900	152	152	PF3D7_0818900	heat shock protein 70	>PF3D7_0818900 organism=Plasmodium_falciparum_3D7 product=heat shock protein 70 (HSP70) location=Pf3D7_08_v3:860384-862417(+) length=677 sequence_SO=chromosome SO=protein_coding	1	K	QKMKENAEAFLGKSIKNAVITVPAYFNDSQR	3	......K.A....	motif1	1	SIK(1)NAVITVPAYFNDSQR	FALSE	SIK(40.43)NAVITVPAYFNDSQR	3	0.56651	40.4317	0.000793487	41.513	39.444	40.432																1	40.4317	0.000793487	41.513	7187400
PF3D7_0819500	270	270	PF3D7_0819500	conserved protein, unknown function	>PF3D7_0819500 organism=Plasmodium_falciparum_3D7 product=conserved protein, unknown function location=Pf3D7_08_v3:881590-884390(+) length=386 sequence_SO=chromosome SO=protein_coding	1	K	IEKTKSIPECLARTGKIQLKKNDISKKIGEL	3	.....GK......	motif4	1	TGK(1)IQLK	FALSE	TGK(116.99)IQLK(-116.99)	2	-0.13337	116.991	0.0279759	135.77	41.775	135.77											1	116.991	0.0279759	135.77	8612100
PF3D7_0819600	216	216	PF3D7_0819600	conserved protein, unknown function	>PF3D7_0819600 organism=Plasmodium_falciparum_3D7 product=conserved Plasmodium protein, unknown function location=Pf3D7_08_v3:885198-886136(-) length=277 sequence_SO=chromosome SO=protein_coding	1	K	DENEEKLKEHTKSEDKKVDTQQNENVKSENV	4			0.904201	SEDK(0.904)K(0.096)VDTQQNENVK	FALSE	SEDK(9.75)K(-9.75)VDTQQNENVK(-108.05)	3	0.39794	9.74902	4.69467e-19	180.11	130.81	129.29																0.904201	9.74902	4.69467e-19	180.11	40157000
PF3D7_0819600	217	217	PF3D7_0819600	conserved protein, unknown function	>PF3D7_0819600 organism=Plasmodium_falciparum_3D7 product=conserved Plasmodium protein, unknown function location=Pf3D7_08_v3:885198-886136(-) length=277 sequence_SO=chromosome SO=protein_coding	1	K	ENEEKLKEHTKSEDKKVDTQQNENVKSENVN	1			0.999993	K(1)VDTQQNENVK	FALSE	K(51.8)VDTQQNENVK(-51.8)	2	0.72523	51.798	5.6561e-07	117.2	76.926	53.237																0.999993	51.798	5.6561e-07	117.2	26319000
PF3D7_0819600	70	70	PF3D7_0819600	conserved protein, unknown function	>PF3D7_0819600 organism=Plasmodium_falciparum_3D7 product=conserved Plasmodium protein, unknown function location=Pf3D7_08_v3:885198-886136(-) length=277 sequence_SO=chromosome SO=protein_coding	1	K	DLVLYFARVECKLSEKLSTYNKSNRKTIKLE	4			0.999923	LSEK(1)LSTYNK	FALSE	LSEK(41.14)LSTYNK(-41.14)	2	-1.3634	41.1441	0.0192912	67.93	32.408	67.93																0.999923	41.1441	0.0192912	67.93	6311300
PF3D7_0821000	56	56	PF3D7_0821000	conserved Plasmodium protein, unknown function	>PF3D7_0821000 organism=Plasmodium_falciparum_3D7 product=conserved Plasmodium protein, unknown function location=Pf3D7_08_v3:948745-950899(+) length=514 sequence_SO=chromosome SO=protein_coding	1	K	NKEDYNSDRKENFDKKLCDNMNDKINIYDNI	1			0.999995	K(1)LCDNMNDK	FALSE	K(53.16)LCDNMNDK(-53.16)	2	-0.49047	53.1585	0.0307718	58.699	11.097	58.699																0.999995	53.1585	0.0307718	58.699	2684800
PF3D7_0821400	99	99	PF3D7_0821400	conserved Plasmodium protein, unknown function	>PF3D7_0821400 organism=Plasmodium_falciparum_3D7 product=conserved Plasmodium protein, unknown function location=Pf3D7_08_v3:965822-966657(+) length=124 sequence_SO=chromosome SO=protein_coding	1	K	KGTNSDSKSKNNDDNKSNVQKYGYFSWLWKY	8			1	SKNNDDNK(1)SNVQK	FALSE	SK(-70.8)NNDDNK(70.8)SNVQK(-113.67)	2	-0.011849	70.7979	9.36535e-39	236.3	173.21	236.3																1	70.7979	9.36535e-39	236.3	17327000
PF3D7_0821400	93	93	PF3D7_0821400	conserved Plasmodium protein, unknown function	>PF3D7_0821400 organism=Plasmodium_falciparum_3D7 product=conserved Plasmodium protein, unknown function location=Pf3D7_08_v3:965822-966657(+) length=124 sequence_SO=chromosome SO=protein_coding	1	K	QGTDKTKGTNSDSKSKNNDDNKSNVQKYGYF	2			0.999295	SK(0.999)NNDDNK(0.001)SNVQK	FALSE	SK(31.51)NNDDNK(-31.51)SNVQK(-89.31)	3	-0.83361	31.5129	2.57632e-05	137.84	101.16	137.84																0.999295	31.5129	2.57632e-05	137.84	93941000
PF3D7_0821400	84	84	PF3D7_0821400	conserved Plasmodium protein, unknown function	>PF3D7_0821400 organism=Plasmodium_falciparum_3D7 product=conserved Plasmodium protein, unknown function location=Pf3D7_08_v3:965822-966657(+) length=124 sequence_SO=chromosome SO=protein_coding	1	K	TDDKSKKDGQGTDKTKGTNSDSKSKNNDDNK	9			0.990379	DGQGTDK(0.01)TK(0.99)GTNSDSK	FALSE	DGQGTDK(-20.18)TK(20.18)GTNSDSK(-39.22)	3	0.084566	20.1794	2.09687e-06	95.197	83.279	95.197																0.990379	20.1794	2.09687e-06	95.197	37570000
PF3D7_0821400	64	64	PF3D7_0821400	conserved Plasmodium protein, unknown function	>PF3D7_0821400 organism=Plasmodium_falciparum_3D7 product=conserved Plasmodium protein, unknown function location=Pf3D7_08_v3:965822-966657(+) length=124 sequence_SO=chromosome SO=protein_coding	1	K	KKPDEKVCSSNTDSQKKSDGTDDKSKKDGQG	10			0.874584	VCSSNTDSQK(0.875)K(0.125)	FALSE	VCSSNTDSQK(8.43)K(-8.43)	2	0.25888	8.43447	0.00312352	75.819	67.409	75.819																0.874584	8.43447	0.00312352	75.819	3853300
PF3D7_0821800	30	30	PF3D7_0821800	protein transport protein SEC61 subunit beta, putative	>PF3D7_0821800 organism=Plasmodium_falciparum_3D7 product=protein transport protein SEC61 subunit beta (Sec61-beta) location=Pf3D7_08_v3:976074-976644(+) length=80 sequence_SO=chromosome SO=protein_coding	1	K	ARRRQSNASANGNNSKQRRNSNGNSNSIVKF	12	A.....K......	motif8	1	QSNASANGNNSK(1)QR	FALSE	QSNASANGNNSK(96.87)QR	3	1.0109	96.8656	9.13737e-05	96.866	77.766	96.866											1	96.8656	9.13737e-05	96.866	8281100	1	50.0878	0.00353307	50.088	9439800
PF3D7_0822900	909	909	PF3D7_0822900	conserved Plasmodium protein, unknown function	>PF3D7_0822900 organism=Plasmodium_falciparum_3D7 product=conserved Plasmodium protein, unknown function location=Pf3D7_08_v3:1007777-1011307(-) length=1176 sequence_SO=chromosome SO=protein_coding	1	K	MYLKNKSKLQGLNTKKYIAFNHNKYVRFLNS	1	......K..A...	motif6	1	K(1)YIAFNHNK	FALSE	K(88.57)YIAFNHNK(-88.57)	2	0.35209	88.5713	0.000707862	102.51	74.251	93.267																1	91.3494	0.000707862	102.51	22765000
PF3D7_0822900	917	917	PF3D7_0822900	conserved Plasmodium protein, unknown function	>PF3D7_0822900 organism=Plasmodium_falciparum_3D7 product=conserved Plasmodium protein, unknown function location=Pf3D7_08_v3:1007777-1011307(-) length=1176 sequence_SO=chromosome SO=protein_coding	1	K	LQGLNTKKYIAFNHNKYVRFLNSCYEKKMNS	8	.A....K......	motif11	1	YIAFNHNK(1)YVR	FALSE	YIAFNHNK(57.53)YVR	3	0.31682	57.5318	0.000143375	96.143	65.892	57.532																1	44.425	0.000143375	96.143	15084000
PF3D7_0822900	532	532	PF3D7_0822900	conserved Plasmodium protein, unknown function	>PF3D7_0822900 organism=Plasmodium_falciparum_3D7 product=conserved Plasmodium protein, unknown function location=Pf3D7_08_v3:1007777-1011307(-) length=1176 sequence_SO=chromosome SO=protein_coding	1	K	NNVLKELKFKSANNIKYGRDNNFDDITEKYI	6	..A...K......	motif11	1	SANNIK(1)YGR	FALSE	SANNIK(91.87)YGR	2	0.11907	91.8667	0.00628085	103.55	72.257	91.867																1	103.546	0.00628085	103.55	13513000
PF3D7_0822900	581	581	PF3D7_0822900	conserved Plasmodium protein, unknown function	>PF3D7_0822900 organism=Plasmodium_falciparum_3D7 product=conserved Plasmodium protein, unknown function location=Pf3D7_08_v3:1007777-1011307(-) length=1176 sequence_SO=chromosome SO=protein_coding	1	K	EEPYHYTNFVKHYVTKVGIYNNMEKNKLNFN	5			1	HYVTK(1)VGIYNNMEK	FALSE	HYVTK(80.75)VGIYNNMEK(-80.75)	3	-0.1985	80.7535	5.16072e-06	107.46	98.582	107.46																1	70.437	5.16072e-06	89.26	17220000
PF3D7_0822900	867	867	PF3D7_0822900	conserved Plasmodium protein, unknown function	>PF3D7_0822900 organism=Plasmodium_falciparum_3D7 product=conserved Plasmodium protein, unknown function location=Pf3D7_08_v3:1007777-1011307(-) length=1176 sequence_SO=chromosome SO=protein_coding	1	K	NNVKNTIKEKKEYYKKNVNCNYELINKNLLK	1			1	K(1)NVNCNYELINK	FALSE	K(91.03)NVNCNYELINK(-91.03)	2	0.065141	91.0298	4.59738e-05	124.42	103.05	120.57																1	91.0298	4.59738e-05	124.42	42818000
PF3D7_0822900	780	780	PF3D7_0822900	conserved Plasmodium protein, unknown function	>PF3D7_0822900 organism=Plasmodium_falciparum_3D7 product=conserved Plasmodium protein, unknown function location=Pf3D7_08_v3:1007777-1011307(-) length=1176 sequence_SO=chromosome SO=protein_coding	1	K	INIDNIKKHVNLENVKKNMDLKNVKKLINLE	8			0.900774	HVNLENVK(0.901)K(0.099)	FALSE	HVNLENVK(9.58)K(-9.58)	3	0.045315	9.57989	0.00124831	91.867	44.565	91.867																0.900774	9.57989	0.00124831	91.867	59711000
PF3D7_0822900	798	798	PF3D7_0822900	conserved Plasmodium protein, unknown function	>PF3D7_0822900 organism=Plasmodium_falciparum_3D7 product=conserved Plasmodium protein, unknown function location=Pf3D7_08_v3:1007777-1011307(-) length=1176 sequence_SO=chromosome SO=protein_coding	1	K	MDLKNVKKLINLENIKNKINFENVKERVNIK	9			0.929767	K(0.001)LINLENIK(0.93)NK(0.07)	FALSE	K(-31.96)LINLENIK(11.26)NK(-11.26)	3	-1.2803	11.2551	0.00094686	79.201	23.74	43.306																0.929767	11.2551	0.0151255	43.306	8647800
PF3D7_0822900	1012	1012	PF3D7_0822900	conserved Plasmodium protein, unknown function	>PF3D7_0822900 organism=Plasmodium_falciparum_3D7 product=conserved Plasmodium protein, unknown function location=Pf3D7_08_v3:1007777-1011307(-) length=1176 sequence_SO=chromosome SO=protein_coding	1	K	NIYNNSSSHKLLNTEKKKNTSNDSEQINNNL	6			0.994908	LLNTEK(0.995)K(0.005)	FALSE	LLNTEK(22.91)K(-22.91)	2	2.2679	22.9088	0.0064307	127.12	16.484	127.12																0.994908	22.9088	0.0209232	127.12	32329000
PF3D7_0822900	849	849	PF3D7_0822900	conserved Plasmodium protein, unknown function	>PF3D7_0822900 organism=Plasmodium_falciparum_3D7 product=conserved Plasmodium protein, unknown function location=Pf3D7_08_v3:1007777-1011307(-) length=1176 sequence_SO=chromosome SO=protein_coding	1	K	NYYDIFEEAYKNYINKYVNNVKNTIKEKKEY	5			0.999999	NYINK(1)YVNNVK	FALSE	NYINK(60.43)YVNNVK(-60.43)	2	-0.52021	60.4311	0.0013224	127.76	99.56	127.76																0.999999	60.4311	0.0013224	127.76	19703000
PF3D7_0822900	813	813	PF3D7_0822900	conserved Plasmodium protein, unknown function	>PF3D7_0822900 organism=Plasmodium_falciparum_3D7 product=conserved Plasmodium protein, unknown function location=Pf3D7_08_v3:1007777-1011307(-) length=1176 sequence_SO=chromosome SO=protein_coding	1	K	KNKINFENVKERVNIKNVTDHINIESISKNV	4			1	VNIK(1)NVTDHINIESISK	FALSE	VNIK(63.27)NVTDHINIESISK(-63.27)	3	0.17892	63.2738	1.00702e-07	80.361	68.46	77.221																1	63.2738	5.70382e-07	77.221	16346000
PF3D7_0822900	772	772	PF3D7_0822900	conserved Plasmodium protein, unknown function	>PF3D7_0822900 organism=Plasmodium_falciparum_3D7 product=conserved Plasmodium protein, unknown function location=Pf3D7_08_v3:1007777-1011307(-) length=1176 sequence_SO=chromosome SO=protein_coding	1	K	GVEIMKKHINIDNIKKHVNLENVKKNMDLKN	1			0.999976	K(1)HVNLENVK	FALSE	K(46.28)HVNLENVK(-46.28)	3	-0.6411	46.2796	0.0050221	60.691	34.279	60.398																0.999976	46.2796	0.0050221	60.398	22537000
PF3D7_0822900	908	908	PF3D7_0822900	conserved Plasmodium protein, unknown function	>PF3D7_0822900 organism=Plasmodium_falciparum_3D7 product=conserved Plasmodium protein, unknown function location=Pf3D7_08_v3:1007777-1011307(-) length=1176 sequence_SO=chromosome SO=protein_coding	1	K	NMYLKNKSKLQGLNTKKYIAFNHNKYVRFLN	7			0.993213	LQGLNTK(0.993)K(0.007)	FALSE	LQGLNTK(21.65)K(-21.65)	2	0.72634	21.6539	0.00317023	137.9	36.213	137.9																0.993213	21.6539	0.00317023	137.9	28037000
PF3D7_0822900	590	590	PF3D7_0822900	conserved Plasmodium protein, unknown function	>PF3D7_0822900 organism=Plasmodium_falciparum_3D7 product=conserved Plasmodium protein, unknown function location=Pf3D7_08_v3:1007777-1011307(-) length=1176 sequence_SO=chromosome SO=protein_coding	1	K	VKHYVTKVGIYNNMEKNKLNFNVPSQSYGIN	9			0.977134	VGIYNNMEK(0.977)NK(0.023)	FALSE	VGIYNNMEK(16.31)NK(-16.31)	3	-0.41739	16.3077	0.000164036	98.04	70.126	90.149																0.977134	16.3077	0.000164036	90.149	61352000
PF3D7_0822900	1100	1100	PF3D7_0822900	conserved Plasmodium protein, unknown function	>PF3D7_0822900 organism=Plasmodium_falciparum_3D7 product=conserved Plasmodium protein, unknown function location=Pf3D7_08_v3:1007777-1011307(-) length=1176 sequence_SO=chromosome SO=protein_coding	1	K	DNAYINVKGNLYFNTKDKLFYDIEYIKDISY	8			0.798326	GNLYFNTK(0.798)DK(0.202)	FALSE	GNLYFNTK(5.98)DK(-5.98)	2	-0.099129	5.9753	0.00570975	89.171	67.799	54.259																0.798326	5.9753	0.0433574	54.259	5631500
PF3D7_0822900	800	800	PF3D7_0822900	conserved Plasmodium protein, unknown function	>PF3D7_0822900 organism=Plasmodium_falciparum_3D7 product=conserved Plasmodium protein, unknown function location=Pf3D7_08_v3:1007777-1011307(-) length=1176 sequence_SO=chromosome SO=protein_coding	1	K	LKNVKKLINLENIKNKINFENVKERVNIKNV	2			0.999996	NK(1)INFENVK	FALSE	NK(54.04)INFENVK(-54.04)	2	0.085542	54.0434	0.00119054	101.65	27.182	101.65																0.999996	54.0434	0.00719922	101.65	3707800
PF3D7_0822900	726	726	PF3D7_0822900	conserved Plasmodium protein, unknown function	>PF3D7_0822900 organism=Plasmodium_falciparum_3D7 product=conserved Plasmodium protein, unknown function location=Pf3D7_08_v3:1007777-1011307(-) length=1176 sequence_SO=chromosome SO=protein_coding	1	K	YYPHCTYSNPLKSIKKYSCTNTKNYINEYNC	1			1	K(1)YSCTNTK	FALSE	K(130.33)YSCTNTK(-130.33)	2	0.051568	130.332	0.00544328	156.35	114.84	153.05																1	130.332	0.00544328	156.35	168900000
PF3D7_0822900	807	807	PF3D7_0822900	conserved Plasmodium protein, unknown function	>PF3D7_0822900 organism=Plasmodium_falciparum_3D7 product=conserved Plasmodium protein, unknown function location=Pf3D7_08_v3:1007777-1011307(-) length=1176 sequence_SO=chromosome SO=protein_coding	1	K	INLENIKNKINFENVKERVNIKNVTDHINIE	9			1	NKINFENVK(1)ER	FALSE	NK(-77.95)INFENVK(77.95)ER	3	0.28143	77.9526	0.000114507	117.01	26.305	95.618																1	77.9526	0.000114507	117.01
PF3D7_0822900	786	786	PF3D7_0822900	conserved Plasmodium protein, unknown function	>PF3D7_0822900 organism=Plasmodium_falciparum_3D7 product=conserved Plasmodium protein, unknown function location=Pf3D7_08_v3:1007777-1011307(-) length=1176 sequence_SO=chromosome SO=protein_coding	1	K	KKHVNLENVKKNMDLKNVKKLINLENIKNKI	5			0.998852	NMDLK(0.999)NVK(0.001)	FALSE	NMDLK(29.4)NVK(-29.4)	2	0.14205	29.3975	0.0123346	119.41	31.037	105.14																0.998852	29.3975	0.0123346	119.41	39962000
PF3D7_0822900	928	928	PF3D7_0822900	conserved Plasmodium protein, unknown function	>PF3D7_0822900 organism=Plasmodium_falciparum_3D7 product=conserved Plasmodium protein, unknown function location=Pf3D7_08_v3:1007777-1011307(-) length=1176 sequence_SO=chromosome SO=protein_coding	1	K	FNHNKYVRFLNSCYEKKMNSVKKKIELNKKF	8			0.976203	FLNSCYEK(0.976)K(0.024)	FALSE	FLNSCYEK(16.13)K(-16.13)	2	-0.020137	16.1302	0.00202428	122.33	87.766	122.33																0.976203	16.1302	0.00202428	122.33	36329000
PF3D7_0822900	526	526	PF3D7_0822900	conserved Plasmodium protein, unknown function	>PF3D7_0822900 organism=Plasmodium_falciparum_3D7 product=conserved Plasmodium protein, unknown function location=Pf3D7_08_v3:1007777-1011307(-) length=1176 sequence_SO=chromosome SO=protein_coding	1	K	KTQINLNNVLKELKFKSANNIKYGRDNNFDD	2	......K.A....	motif1	1	FK(1)SANNIK	FALSE	FK(93.51)SANNIK(-93.51)	2	-1.0087	93.5075	0.00909447	111.95	27.703	111.95																1	93.5075	0.00909447	111.95	37242000
PF3D7_0822900	511	511	PF3D7_0822900	conserved Plasmodium protein, unknown function	>PF3D7_0822900 organism=Plasmodium_falciparum_3D7 product=conserved Plasmodium protein, unknown function location=Pf3D7_08_v3:1007777-1011307(-) length=1176 sequence_SO=chromosome SO=protein_coding	1	K	HSNNIENISNCIQKKKTQINLNNVLKELKFK	1	......K.Q....	motif7	0.999987	K(1)TQINLNNVLK	FALSE	K(48.9)TQINLNNVLK(-48.9)	2	-0.32475	48.8969	0.0166693	53.237	20.908	53.237																0.999987	48.8969	0.0166693	53.237	2178700
PF3D7_0822900	878	878	PF3D7_0822900	conserved Plasmodium protein, unknown function	>PF3D7_0822900 organism=Plasmodium_falciparum_3D7 product=conserved Plasmodium protein, unknown function location=Pf3D7_08_v3:1007777-1011307(-) length=1176 sequence_SO=chromosome SO=protein_coding	1	K	EYYKKNVNCNYELINKNLLKVAANNINNLNN	11	......K.....A	motif2	0.778414	NVNCNYELINK(0.778)NLLK(0.222)	FALSE	NVNCNYELINK(5.46)NLLK(-5.46)	3	0.57909	5.45667	0.000574518	47.774	40.87	47.774																0.778414	5.45667	0.000574518	47.774	12529000
PF3D7_0822900	901	901	PF3D7_0822900	conserved Plasmodium protein, unknown function	>PF3D7_0822900 organism=Plasmodium_falciparum_3D7 product=conserved Plasmodium protein, unknown function location=Pf3D7_08_v3:1007777-1011307(-) length=1176 sequence_SO=chromosome SO=protein_coding	1	K	NNINNLNNMYLKNKSKLQGLNTKKYIAFNHN	2	......K.Q....	motif7	1	SK(1)LQGLNTK	FALSE	SK(87.3)LQGLNTK(-87.3)	2	0.64185	87.2964	0.00893812	98.048	37.612	98.048																1	87.2964	0.00893812	98.048	58604000
PF3D7_0822900	703	703	PF3D7_0822900	conserved Plasmodium protein, unknown function	>PF3D7_0822900 organism=Plasmodium_falciparum_3D7 product=conserved Plasmodium protein, unknown function location=Pf3D7_08_v3:1007777-1011307(-) length=1176 sequence_SO=chromosome SO=protein_coding	1	K	NPKLDCLSKSFSKIRKINLCNSAYYPHCTYS	1			1	K(1)INLCNSAYYPHCTYSNPLK	FALSE	K(64.97)INLCNSAYYPHCTYSNPLK(-64.97)	4	-0.7727	64.9667	4.4739e-07	66.152	57.295	66.152																1	64.9667	4.4739e-07	66.152	25889000
PF3D7_0822900	790	790	PF3D7_0822900	conserved Plasmodium protein, unknown function	>PF3D7_0822900 organism=Plasmodium_falciparum_3D7 product=conserved Plasmodium protein, unknown function location=Pf3D7_08_v3:1007777-1011307(-) length=1176 sequence_SO=chromosome SO=protein_coding	1	K	NLENVKKNMDLKNVKKLINLENIKNKINFEN	1			0.99999	K(1)LINLENIK	FALSE	K(49.92)LINLENIK(-49.92)	2	0.01188	49.9178	0.0208783	66.056	7.3571	66.056																0.99999	49.9178	0.0208783	66.056	3425500
PF3D7_0823300	1362	1362	PF3D7_0823300	histone acetyltransferase GCN5	>PF3D7_0823300 organism=Plasmodium_falciparum_3D7 product=histone acetyltransferase GCN5 (GCN5) location=Pf3D7_08_v3:1028752-1033514(+) length=1465 sequence_SO=chromosome SO=protein_coding	1	K	TREITKKVQHKEVQLKDQILGVLDYLEKQQS	9	......K.Q....	motif7	0.953189	VQHK(0.047)EVQLK(0.953)	TRUE	VQHK(-13.09)EVQLK(13.09)	2	0.75785	13.0893	0.0343599	49.536	13.089	49.536											0.953189	13.0893	0.0343599	49.536	2846700
PF3D7_0823800	176	176	PF3D7_0823800	DnaJ protein, putative	>PF3D7_0823800 organism=Plasmodium_falciparum_3D7 product=DnaJ protein, putative location=Pf3D7_08_v3:1043813-1045780(+) length=655 sequence_SO=chromosome SO=protein_coding	1	K	KTLSDSRLKKAYDNSKGKVLKLIESNSINLN	6	.A....K......	motif11	0.933814	AYDNSK(0.934)GK(0.066)	FALSE	AYDNSK(11.49)GK(-11.49)	2	-0.28537	11.4949	0.0311918	84.743	35.987	84.743																0.933814	11.4949	0.0311918	84.743	5505000
PF3D7_0823800	343	343	PF3D7_0823800	DnaJ protein, putative	>PF3D7_0823800 organism=Plasmodium_falciparum_3D7 product=DnaJ protein, putative location=Pf3D7_08_v3:1043813-1045780(+) length=655 sequence_SO=chromosome SO=protein_coding	1	K	HVILLTNKKKLSLQAKQITYKFNNIYKTYSI	6	.....AK......	motif5	0.999903	LSLQAK(1)QITYK	FALSE	LSLQAK(40.14)QITYK(-40.14)	3	0.38603	40.1376	0.00162316	58.274	41.36	58.274																0.999903	40.1376	0.00162316	58.274	5233200
PF3D7_0823800	372	372	PF3D7_0823800	DnaJ protein, putative	>PF3D7_0823800 organism=Plasmodium_falciparum_3D7 product=DnaJ protein, putative location=Pf3D7_08_v3:1043813-1045780(+) length=655 sequence_SO=chromosome SO=protein_coding	1	K	SIKYNEIDNISNESIKKSIIDSLKVLSIKKD	13			0.850034	YNEIDNISNESIK(0.85)K(0.15)	FALSE	YNEIDNISNESIK(7.53)K(-7.53)	3	0.51476	7.53443	0.00029559	64.104	52.046	64.104																0.850034	7.53443	0.00029559	64.104	6141900
PF3D7_0825300	120	120	PF3D7_0825300	SAYSvFN domain-containing protein, putative	>PF3D7_0825300 organism=Plasmodium_falciparum_3D7 product=conserved protein, unknown function location=Pf3D7_08_v3:1095116-1095562(-) length=148 sequence_SO=chromosome SO=protein_coding	1	K	YDDIDKNKFYIKGSSKYNNKLCTCGSKKKFK	4			0.99528	GSSK(0.995)YNNK(0.005)	FALSE	GSSK(23.24)YNNK(-23.24)	2	1.0724	23.2397	0.0363536	78.77	41.043	78.77																0.99528	23.2397	0.0363536	78.77	4564100
PF3D7_0826100	6202	6202	PF3D7_0826100	HECT-like E3 ubiquitin ligase, putative	>PF3D7_0826100 organism=Plasmodium_falciparum_3D7 product=E3 ubiquitin-protein ligase, putative location=Pf3D7_08_v3:1113369-1139144(-) length=8591 sequence_SO=chromosome SO=protein_coding	1	K	NKDKKLSRFTTTTNDKKKNTNEENDIIESNE	8			0.892338	FTTTTNDK(0.892)K(0.099)K(0.008)	FALSE	FTTTTNDK(9.53)K(-9.53)K(-20.36)	2	-0.08369	9.52934	0.00321215	135.55	114.55	104.22						0.496473		0.00321215	132.88		0.837266	7.6408	0.0246376	83.869	3358700	0.892338	9.52934	0.00368678	135.55	6175600
PF3D7_0826100	6401	6401	PF3D7_0826100	HECT-like E3 ubiquitin ligase, putative	>PF3D7_0826100 organism=Plasmodium_falciparum_3D7 product=E3 ubiquitin-protein ligase, putative location=Pf3D7_08_v3:1113369-1139144(-) length=8591 sequence_SO=chromosome SO=protein_coding	1	K	NITLTGISEKAQDNIKNKKIISIKMYKNYLK	6	.A....K......	motif11	0.890999	AQDNIK(0.891)NK(0.1)K(0.009)	FALSE	AQDNIK(9.48)NK(-9.48)K(-20.13)	2	-0.53805	9.48331	1.77602e-11	140.83	58.164	83.948						0.890999	9.48331	0.0485523	83.948	13011000						0.879384	8.67818	0.0138585	116.37	7559600
PF3D7_0826100	6203	6203	PF3D7_0826100	HECT-like E3 ubiquitin ligase, putative	>PF3D7_0826100 organism=Plasmodium_falciparum_3D7 product=E3 ubiquitin-protein ligase, putative location=Pf3D7_08_v3:1113369-1139144(-) length=8591 sequence_SO=chromosome SO=protein_coding	1	K	KDKKLSRFTTTTNDKKKNTNEENDIIESNEN	9			0.923765	FTTTTNDK(0.067)K(0.924)K(0.009)	FALSE	FTTTTNDK(-11.37)K(11.37)K(-20.16)	2	-0.48336	11.3729	0.00321215	135.55	114.55	132.88						0.923765	11.3729	0.00321215	132.88							0.511799	1.12664	0.00372669	73.499	5236300
PF3D7_0826100	2748	2748	PF3D7_0826100	HECT-like E3 ubiquitin ligase, putative	>PF3D7_0826100 organism=Plasmodium_falciparum_3D7 product=E3 ubiquitin-protein ligase, putative location=Pf3D7_08_v3:1113369-1139144(-) length=8591 sequence_SO=chromosome SO=protein_coding	1	K	LWMKEKNKEKKNVGNKDKEKDAFNYPNVNIL	5	......K.....A	motif2	0.99861	NVGNK(0.999)DK(0.001)EK	FALSE	NVGNK(28.59)DK(-28.59)EK(-51.53)	2	0.26375	28.5868	0.00988901	122.96	60.498	114.39																0.99861	28.5868	0.00988901	122.96	29850000
PF3D7_0826100	7390	7390	PF3D7_0826100	HECT-like E3 ubiquitin ligase, putative	>PF3D7_0826100 organism=Plasmodium_falciparum_3D7 product=E3 ubiquitin-protein ligase, putative location=Pf3D7_08_v3:1113369-1139144(-) length=8591 sequence_SO=chromosome SO=protein_coding	1	K	DRNGTNPERNVSCTNKENTNKNKDTKQKQNK	7			0.994431	NVSCTNK(0.994)ENTNK(0.006)	FALSE	NVSCTNK(22.52)ENTNK(-22.52)	3	0.96811	22.518	8.6548e-05	80.69	66.944	80.69																0.994431	22.518	8.6548e-05	80.69	6284300
PF3D7_0826500	704	704	PF3D7_0826500	ubiquitin conjugation factor E4 B, putative	>PF3D7_0826500 organism=Plasmodium_falciparum_3D7 product=ubiquitin conjugation factor E4 B, putative (UBE4B) location=Pf3D7_08_v3:1152302-1156282(+) length=1326 sequence_SO=chromosome SO=protein_coding	1	K	RENEKVERNEPIGENKRIENNDGVVENNQMN	8			1	NEPIGENK(1)R	FALSE	NEPIGENK(123.35)R	2	0.42022	123.355	0.00188676	123.35	87.91	123.35																1	123.355	0.00188676	123.35	78551000
PF3D7_0826700	226	226	PF3D7_0826700	receptor for activated c kinase	>PF3D7_0826700 organism=Plasmodium_falciparum_3D7 product=receptor for activated c kinase (RACK) location=Pf3D7_08_v3:1160164-1161708(-) length=323 sequence_SO=chromosome SO=protein_coding	1	K	PDGSLCASGGKDGVAKLWDVKEGKHLYSLET	5	.....AK......	motif5	0.999987	DGVAK(1)LWDVK	FALSE	DGVAK(48.99)LWDVK(-48.99)	2	0.49351	48.9861	0.0221207	61.419	37.43	61.419																0.999987	48.9861	0.029102	61.419	26809000
PF3D7_0826700	231	231	PF3D7_0826700	receptor for activated c kinase	>PF3D7_0826700 organism=Plasmodium_falciparum_3D7 product=receptor for activated c kinase (RACK) location=Pf3D7_08_v3:1160164-1161708(-) length=323 sequence_SO=chromosome SO=protein_coding	1	K	CASGGKDGVAKLWDVKEGKHLYSLETGSTIN	5	A.....K......	motif8	0.999965	LWDVK(1)EGK	FALSE	LWDVK(44.5)EGK(-44.5)	3	0.16417	44.5008	0.005306	114.28	57	66.351						0.996983	25.1911	0.0187002	102.51	205810000	0.998285	27.6497	0.027413	91.069	31769000	0.999965	44.5008	0.005306	114.28	146310000
PF3D7_0826700	221	221	PF3D7_0826700	receptor for activated c kinase	>PF3D7_0826700 organism=Plasmodium_falciparum_3D7 product=receptor for activated c kinase (RACK) location=Pf3D7_08_v3:1160164-1161708(-) length=323 sequence_SO=chromosome SO=protein_coding	1	K	TVTISPDGSLCASGGKDGVAKLWDVKEGKHL	26	.....GK......	motif4	0.994403	NLEGHTGVLNTVTISPDGSLCASGGK(0.994)DGVAK(0.006)	FALSE	NLEGHTGVLNTVTISPDGSLCASGGK(22.5)DGVAK(-22.5)	4	-0.14899	22.4957	1.44908e-18	73.361	66.351	73.361																0.994403	22.4957	1.44908e-18	73.361	32133000
PF3D7_0828300	263	263	PF3D7_0828300	conserved protein, unknown function	>PF3D7_0828300 organism=Plasmodium_falciparum_3D7 product=conserved Plasmodium protein, unknown function location=Pf3D7_08_v3:1221025-1222683(-) length=552 sequence_SO=chromosome SO=protein_coding	1	K	YDSDEPILIRSNLKNKINIQTNKLGNTSHYS	2			1	NK(1)INIQTNK	FALSE	NK(87.53)INIQTNK(-87.53)	2	0.2025	87.5286	0.00318585	123.35	53.757	123.35																1	87.5286	0.00318585	123.35	11962000
PF3D7_0831200	403	403	PF3D7_0831200	DnaJ protein, putative	>PF3D7_0831200 organism=Plasmodium_falciparum_3D7 product=DnaJ protein, putative location=Pf3D7_08_v3:1333288-1336299(+) length=961 sequence_SO=chromosome SO=protein_coding	1	K	LLNNPDLYKSESNNIKSNNIKSNNIKSNNIK	5			0.999886	SNNIK(1)SNNIK	FALSE	SNNIK(39.43)SNNIK(-39.43)	2	-0.47663	39.43	0.0118121	65.842	29.417	65.842											0.999886	39.43	0.0118121	65.842
PF3D7_0831200	312	312	PF3D7_0831200	DnaJ protein, putative	>PF3D7_0831200 organism=Plasmodium_falciparum_3D7 product=DnaJ protein, putative location=Pf3D7_08_v3:1333288-1336299(+) length=961 sequence_SO=chromosome SO=protein_coding	1	K	RKRRNRNENTKCAEKKNIDNYKEKVFLLKYN	1			1	K(1)NIDNYKEK	FALSE	K(85.83)NIDNYK(-85.83)EK(-122.59)	2	0.48208	85.8281	0.00673363	136.02	24.284	136.02						1	85.8281	0.00673363	136.02	11468000	0.999997	55.1943	0.0247729	99.568	7855600
PF3D7_0831400	182	182	PF3D7_0831400	Plasmodium exported protein, unknown function	>PF3D7_0831400 organism=Plasmodium_falciparum_3D7 product=Plasmodium exported protein, unknown function location=Pf3D7_08_v3:1344405-1345487(-) length=302 sequence_SO=chromosome SO=protein_coding	1	K	DQNLIEKCLCKLKAGKYINEAKIKYAHEIID	3	.....GK......	motif4	1	AGK(1)YINEAK	FALSE	AGK(82.94)YINEAK(-82.94)	2	-0.64742	82.9369	0.00207344	128.27	79.289	112.71						1	82.9369	0.00488892	112.71	58042000	1	99.0994	0.00207344	128.27	31813000	0.999975	45.9584	0.0440063	62.201	5344800
PF3D7_0831400	190	190	PF3D7_0831400	Plasmodium exported protein, unknown function	>PF3D7_0831400 organism=Plasmodium_falciparum_3D7 product=Plasmodium exported protein, unknown function location=Pf3D7_08_v3:1344405-1345487(-) length=302 sequence_SO=chromosome SO=protein_coding	1	K	LCKLKAGKYINEAKIKYAHEIIDSMKLTDKV	2	......K.A....	motif1	1	IK(1)YAHEIIDSMK	FALSE	IK(80.77)YAHEIIDSMK(-80.77)	3	-0.51794	80.7717	5.84346e-05	97.69	68.146	82.069											1	80.7717	5.84346e-05	97.69	16338000
PF3D7_0831400	179	179	PF3D7_0831400	Plasmodium exported protein, unknown function	>PF3D7_0831400 organism=Plasmodium_falciparum_3D7 product=Plasmodium exported protein, unknown function location=Pf3D7_08_v3:1344405-1345487(-) length=302 sequence_SO=chromosome SO=protein_coding	1	K	RLNDQNLIEKCLCKLKAGKYINEAKIKYAHE	2	......KA.....	motif3	0.935199	LK(0.935)AGK(0.064)YINEAK(0.001)	FALSE	LK(11.63)AGK(-11.63)YINEAK(-32.15)	3	0.5088	11.6316	0.00822462	51.727	22.769	40.015											0.935199	11.6316	0.00822462	51.727	16809000
PF3D7_0831400	200	200	PF3D7_0831400	Plasmodium exported protein, unknown function	>PF3D7_0831400 organism=Plasmodium_falciparum_3D7 product=Plasmodium exported protein, unknown function location=Pf3D7_08_v3:1344405-1345487(-) length=302 sequence_SO=chromosome SO=protein_coding	1	K	NEAKIKYAHEIIDSMKLTDKVKDIFKEFMRY	10			0.999935	YAHEIIDSMK(1)LTDK	FALSE	YAHEIIDSMK(41.88)LTDK(-41.88)	3	-0.53803	41.8817	3.73581e-06	115.12	104.17	104.41											0.999935	41.8817	3.73581e-06	115.12	42762000
PF3D7_0831400	298	298	PF3D7_0831400	Plasmodium exported protein, unknown function	>PF3D7_0831400 organism=Plasmodium_falciparum_3D7 product=Plasmodium exported protein, unknown function location=Pf3D7_08_v3:1344405-1345487(-) length=302 sequence_SO=chromosome SO=protein_coding	1	K	KIKKLMREKARKDKEKNGYI___________	4			0.999745	DKEK(1)NGYI	FALSE	DK(-35.94)EK(35.94)NGYI	2	-0.19636	35.9378	0.0365597	105.14	85.349	105.14											0.999745	35.9378	0.0365597	105.14	8531400
PF3D7_0831400	173	173	PF3D7_0831400	Plasmodium exported protein, unknown function	>PF3D7_0831400 organism=Plasmodium_falciparum_3D7 product=Plasmodium exported protein, unknown function location=Pf3D7_08_v3:1344405-1345487(-) length=302 sequence_SO=chromosome SO=protein_coding	1	K	TDEVTTRLNDQNLIEKCLCKLKAGKYINEAK	9			0.999864	LNDQNLIEK(1)CLCK	FALSE	LNDQNLIEK(38.67)CLCK(-38.67)	3	-0.19609	38.6686	5.63154e-07	132.79	109.61	132.79						0.999603	34.01	2.83E-05	109	37794000	0.999864	38.6686	5.63154e-07	132.79	96368000
PF3D7_0831400	204	204	PF3D7_0831400	Plasmodium exported protein, unknown function	>PF3D7_0831400 organism=Plasmodium_falciparum_3D7 product=Plasmodium exported protein, unknown function location=Pf3D7_08_v3:1344405-1345487(-) length=302 sequence_SO=chromosome SO=protein_coding	1	K	IKYAHEIIDSMKLTDKVKDIFKEFMRYYIWK	4			0.986607	LTDK(0.987)VK(0.013)DIFK	FALSE	LTDK(18.68)VK(-18.68)DIFK(-51.53)	3	-0.45032	18.675	0.00676508	62.633	41.261	62.633						0.964646	14.4281	0.0293826	41.399	4145100	0.986607	18.675	0.00676508	62.633	13602000
PF3D7_0831700	555	555	PF3D7_0831700	heat shock protein 70	>PF3D7_0831700 organism=Plasmodium_falciparum_3D7 product=heat shock protein 70 (HSP70-x) location=Pf3D7_08_v3:1365467-1367506(-) length=679 sequence_SO=chromosome SO=protein_coding	1	K	RLSKDDIDRMVNDAEKYKEEDEQNKNRIEAR	7	....A.K......	motif10	0.997394	MVNDAEK(0.997)YK(0.003)	FALSE	MVNDAEK(25.83)YK(-25.83)	2	0.81795	25.8294	0.00471315	114.86	85.94	114.86																0.997394	25.8294	0.00471315	114.86	75630000
PF3D7_0831700	600	600	PF3D7_0831700	heat shock protein 70	>PF3D7_0831700 organism=Plasmodium_falciparum_3D7 product=heat shock protein 70 (HSP70-x) location=Pf3D7_08_v3:1365467-1367506(-) length=679 sequence_SO=chromosome SO=protein_coding	1	K	QDENLKTKIPKDDSEKCMKTVKSVLDWLEKN	5			0.999323	DDSEK(0.999)CMK(0.001)	FALSE	DDSEK(31.69)CMK(-31.69)	2	0.094692	31.6885	0.0363536	78.77	35.687	78.77											0.999323	31.6885	0.0363536	78.77	8282500
PF3D7_0903100	187	187	PF3D7_0903100	protein RER1, putative	>PF3D7_0903100 organism=Plasmodium_falciparum_3D7 product=protein RER1, putative (RER1) location=Pf3D7_09_v3:130140-130937(-) length=201 sequence_SO=chromosome SO=protein_coding	1	K	KNMIRFKYLPFNTSTKQTYGSVVRGTKNGK_	9			1	YLPFNTSTK(1)QTYGSVVR	FALSE	YLPFNTSTK(45)QTYGSVVR	3	0.31689	44.9984	7.97134e-08	89.358	68.773	44.998																1	47.5475	7.97134e-08	89.358	30516000
PF3D7_0903100	178	178	PF3D7_0903100	protein RER1, putative	>PF3D7_0903100 organism=Plasmodium_falciparum_3D7 product=protein RER1, putative (RER1) location=Pf3D7_09_v3:130140-130937(-) length=201 sequence_SO=chromosome SO=protein_coding	1	K	FFATMKQQIKNMIRFKYLPFNTSTKQTYGSV	2			1	FK(1)YLPFNTSTK	FALSE	FK(63.21)YLPFNTSTK(-63.21)	2	2.1632	63.2108	0.00842692	68.515	53.143	68.515																1	63.2108	0.00842692	68.515	11870000
PF3D7_0903200	139	139	PF3D7_0903200	ras-related protein RAB7	>PF3D7_0903200 organism=Plasmodium_falciparum_3D7 product=ras-related protein RAB7 (RAB7) location=Pf3D7_09_v3:133762-135587(-) length=206 sequence_SO=chromosome SO=protein_coding	1	K	GNKVDETNKRKVQSLKVLQWCKSNNNIPYFE	6			0.991662	K(0.008)VQSLK(0.992)VLQWCK	FALSE	K(-20.76)VQSLK(20.76)VLQWCK(-50.27)	3	-0.079043	20.7578	0.00251257	57.175	50.045	57.175																0.991662	20.7578	0.00251257	57.175	10349000
PF3D7_0903400	1729	1729	PF3D7_0903400	ATP-dependent RNA helicase DDX60, putative	>PF3D7_0903400 organism=Plasmodium_falciparum_3D7 product=DEAD/DEAH box helicase, putative location=Pf3D7_09_v3:151700-159541(-) length=2536 sequence_SO=chromosome SO=protein_coding	1	K	QHDKYYGDEERAFNTKMENKMRREKYENMLK	5	..A...K......	motif11	0.982433	AFNTK(0.982)MENK(0.018)	FALSE	AFNTK(17.48)MENK(-17.48)	2	-0.60682	17.476	0.0164536	66.27	37.121	66.27																0.982433	17.476	0.0164536	66.27
PF3D7_0903600.1	748	748	PF3D7_0903600.1	conserved protein, unknown function, unspecified product	>PF3D7_0903600.1 organism=Plasmodium_falciparum_3D7 product=conserved Plasmodium protein, unknown function location=Pf3D7_09_v3:168493-172887(+) length=760 sequence_SO=chromosome SO=protein_coding	1	K	LQTYNLSLRNEITGIKLRAQTCAEYEKK___	7	......K..A...	motif6	1	NEITGIK(1)LR	FALSE	NEITGIK(123.35)LR	2	0.29304	123.355	0.00220069	144.09	56.613	123.35																1	135.711	0.00220069	144.09	18100000
PF3D7_0903600.1	759	759	PF3D7_0903600.1	conserved protein, unknown function, unspecified product	>PF3D7_0903600.1 organism=Plasmodium_falciparum_3D7 product=conserved Plasmodium protein, unknown function location=Pf3D7_09_v3:168493-172887(+) length=760 sequence_SO=chromosome SO=protein_coding	1	K	ITGIKLRAQTCAEYEKK______________	9			0.918733	AQTCAEYEK(0.919)K(0.081)	FALSE	AQTCAEYEK(10.53)K(-10.53)	2	-0.5391	10.5327	0.000662419	133.81	101.48	91.549																0.918733	10.5327	0.000662419	133.81	22681000
PF3D7_0903700	112	112	PF3D7_0903700	alpha tubulin 1	>PF3D7_0903700 organism=Plasmodium_falciparum_3D7 product=alpha tubulin 1 location=Pf3D7_09_v3:175542-177442(+) length=453 sequence_SO=chromosome SO=protein_coding	1	K	EDAANNFARGHYTIGKEVIDVCLDRIRKLAD	7	.....GK......	motif4	1	GHYTIGK(1)EVIDVCLDR	FALSE	GHYTIGK(63.68)EVIDVCLDR	3	0.18297	63.6823	2.83316e-05	63.682	6.3939	63.682																1	63.6823	2.83316e-05	63.682	5446000
PF3D7_0903700	60	60	PF3D7_0903700	alpha tubulin 1	>PF3D7_0903700 organism=Plasmodium_falciparum_3D7 product=alpha tubulin 1 location=Pf3D7_09_v3:175542-177442(+) length=453 sequence_SO=chromosome SO=protein_coding	1	K	NDDAFNTFFSETGAGKHVPRCVFVDLEPTVV	17	.....GK......	motif4	1	ANDDAFNTFFSETGAGK(1)HVPR	FALSE	ANDDAFNTFFSETGAGK(42.12)HVPR	4	-0.10837	42.1233	0.000342971	42.123	39.322	42.123																1	42.1233	0.000342971	42.123	15199000
PF3D7_0903700;tr|C9JDS9|C9JDS9_HUMAN;tr|F8VQQ4|F8VQQ4_HUMAN;tr|C9JEV8|C9JEV8_HUMAN;tr|C9JQ00|C9JQ00_HUMAN;tr|C9JJQ8|C9JJQ8_HUMAN;sp|Q13748|TBA3C_HUMAN;sp|Q71U36-2|TBA1A_HUMAN;sp|Q9BQE3|TBA1C_HUMAN;sp|Q71U36|TBA1A_HUMAN;tr|F5H5D3|F5H5D3_HUMAN;sp|P68363|TBA		163	PF3D7_0903700	alpha tubulin 1	>PF3D7_0903700 organism=Plasmodium_falciparum_3D7 product=alpha tubulin 1 location=Pf3D7_09_v3:175542-177442(+) length=453 sequence_SO=chromosome SO=protein_coding;>tr|C9JDS9|C9JDS9_HUMAN Tubulin alpha-4A chain (Fragment) OS=Homo sapiens GN=TUBA4A PE=1 SV	1	K	GFASLLMERLSVDYGKKSKLEFAIYPAPQVS;GFGCLMLERLSVDYGKKSKLNFCCWPSPQVS	7	.....GK......	motif4	0.964713	LSVDYGK(0.965)K(0.035)	FALSE	LSVDYGK(14.37)K(-14.37)	2	0.18073	14.3679	0.00794596	117.39	54.508	74.486											0.964713	14.3679	0.0257991	74.486	16528000	0.935008	11.5796	0.00794596	117.39	52328000
PF3D7_0904600	1676	1676	PF3D7_0904600	ubiquitin specific protease, putative	>PF3D7_0904600 organism=Plasmodium_falciparum_3D7 product=ubiquitin specific protease, putative location=Pf3D7_09_v3:212515-217983(+) length=1770 sequence_SO=chromosome SO=protein_coding	1	K	NILIIHLIRLQEDGSKIDKPIKFDMADFTIE	7			0.995153	LQEDGSK(0.995)IDK(0.005)PIK	FALSE	LQEDGSK(23.13)IDK(-23.13)PIK(-54.94)	3	-0.21818	23.1268	5.03404e-26	95.417	59.125	95.417						0.989572	20.0198	0.000189462	69.345	32639000	0.949989	12.7927	6.42911e-05	80.312	14235000	0.995153	23.1268	5.03404e-26	95.417	110110000
PF3D7_0904800	159	159	PF3D7_0904800	replication protein A1, small fragment	>PF3D7_0904800 organism=Plasmodium_falciparum_3D7 product=replication protein A1, small fragment (RPA1) location=Pf3D7_09_v3:222271-224156(+) length=484 sequence_SO=chromosome SO=protein_coding	1	K	IGIVKHIGTVSNLKTKQGNDIAKQNIIIVDD	2	......K.....A	motif2	1	TK(1)QGNDIAK	FALSE	TK(68.52)QGNDIAK(-68.52)	2	0.50422	68.5186	0.0214408	70.363	26.555	70.363																1	68.5186	0.0214408	70.363	7646600
PF3D7_0904900	2166	2166	PF3D7_0904900	copper-transporting ATPase	>PF3D7_0904900 organism=Plasmodium_falciparum_3D7 product=copper-transporting ATPase (CuTP) location=Pf3D7_09_v3:224875-232831(-) length=2568 sequence_SO=chromosome SO=protein_coding	1	K	IVSFITDKNKKNKYNKILDNSLKEHFINNSD	3			1	YNK(1)ILDNSLK	FALSE	YNK(82.65)ILDNSLK(-82.65)	2	-0.25496	82.6545	0.000523404	99.568	37.789	99.568											0.999978	46.6366	0.013982	74.841	8042600	1	72.944	0.000523404	86.344	10996000
PF3D7_0908000	399	399	PF3D7_0908000	plasma membrane protein 1, putative	>PF3D7_0908000 organism=Plasmodium_falciparum_3D7 product=P1 nuclease, putative location=Pf3D7_09_v3:369870-371554(-) length=416 sequence_SO=chromosome SO=protein_coding	1	K	LLLLFYFNIIMKRRNKMHLPDKIEHIELQGK	2			0.999655	NK(1)MHLPDKIEHIELQGK	FALSE	NK(34.62)MHLPDK(-34.62)IEHIELQGK(-65.68)	4	0.62876	34.6185	5.29942e-06	66.809	52.543	66.809																0.999655	34.6185	5.29942e-06	66.809	11654000
PF3D7_0911100	391	391	PF3D7_0911100	conserved protein, unknown function	>PF3D7_0911100 organism=Plasmodium_falciparum_3D7 product=conserved Plasmodium protein, unknown function location=Pf3D7_09_v3:504412-508130(+) length=1165 sequence_SO=chromosome SO=protein_coding	1	K	QDIIIDNNEKSFLYEKNRQQNINVYTQTSNK	6			1	SFLYEK(1)NR	FALSE	SFLYEK(133.12)NR	2	0.032881	133.116	0.00592258	133.12	75.835	133.12																1	133.116	0.00592258	133.12	214700000
PF3D7_0911100	329	329	PF3D7_0911100	conserved protein, unknown function	>PF3D7_0911100 organism=Plasmodium_falciparum_3D7 product=conserved Plasmodium protein, unknown function location=Pf3D7_09_v3:504412-508130(+) length=1165 sequence_SO=chromosome SO=protein_coding	1	K	LKNDSKTTIYDEGVSKKNIYNCDVNHIFDNF	10			0.860788	TTIYDEGVSK(0.861)K(0.139)	FALSE	TTIYDEGVSK(7.91)K(-7.91)	2	-0.26943	7.9122	0.010278	59.198	41.533	59.198																0.860788	7.9122	0.010278	59.198	4751900
PF3D7_0911100	406	406	PF3D7_0911100	conserved protein, unknown function	>PF3D7_0911100 organism=Plasmodium_falciparum_3D7 product=conserved Plasmodium protein, unknown function location=Pf3D7_09_v3:504412-508130(+) length=1165 sequence_SO=chromosome SO=protein_coding	1	K	KNRQQNINVYTQTSNKKSRWLCSTADDSHNE	13			0.825116	QQNINVYTQTSNK(0.825)K(0.175)	FALSE	QQNINVYTQTSNK(6.74)K(-6.74)	3	-1.517	6.73765	0.00501425	43.03	32.386	43.03																0.825116	6.73765	0.00501425	43.03
PF3D7_0913200	96	96	PF3D7_0913200	elongation factor 1-beta	>PF3D7_0913200 organism=Plasmodium_falciparum_3D7 product=elongation factor 1-beta (EF-1beta) location=Pf3D7_09_v3:575679-576509(+) length=276 sequence_SO=chromosome SO=protein_coding	1	K	KKKGNSGTNTTTCTNKKSNKAAGGDDDDDND	13	......K.....A	motif2	0.987677	GNSGTNTTTCTNK(0.988)K(0.012)	FALSE	GNSGTNTTTCTNK(19.04)K(-19.04)	2	-0.56984	19.0389	4.75953e-09	157.09	131.72	124.07																0.987677	19.0389	4.75953e-09	157.09
PF3D7_0914600	42	42	PF3D7_0914600	transcription elongation factor 1, putative	>PF3D7_0914600 organism=Plasmodium_falciparum_3D7 product=zinc binding protein, putative location=Pf3D7_09_v3:627754-628319(+) length=111 sequence_SO=chromosome SO=protein_coding	1	K	FCSYKKSVDIKLHRSKGIGELACLKCGVKYV	2	......K.....A	motif2	0.999997	SK(1)GIGELACLK	FALSE	SK(55.61)GIGELACLK(-55.61)	2	-1.6102	55.6143	0.0110581	57.175	31.701	57.175																0.999997	55.6143	0.0110581	57.175
PF3D7_0914700	7	7	PF3D7_0914700	major facilitator superfamily-related transporter, putative	>PF3D7_0914700 organism=Plasmodium_falciparum_3D7 product=transporter, putative location=Pf3D7_09_v3:630657-632207(+) length=516 sequence_SO=chromosome SO=protein_coding	1	K	_________MASDVSKENISQLKYEGQAPND	6	.A....K......	motif11	0.999959	ASDVSK(1)ENISQLK	FALSE	ASDVSK(43.9)ENISQLK(-43.9)	2	-0.00092291	43.9018	7.07355e-05	82.202	66.657	82.202											0.999959	43.9018	7.07355e-05	82.202	3208400
PF3D7_0915000	22	22	PF3D7_0915000	type II NADH:ubiquinone oxidoreductase	>PF3D7_0915000 organism=Plasmodium_falciparum_3D7 product=type II NADH:ubiquinone oxidoreductase (NDH2) location=Pf3D7_09_v3:639658-641259(-) length=533 sequence_SO=chromosome SO=protein_coding	1	K	KCGQANIFRSISNVRKIYNVAKNNLKNNKDI	1			1	K(1)IYNVAK	FALSE	K(89.26)IYNVAK(-89.26)	2	-0.2158	89.2615	0.0281749	107.32	48.766	97.602																1	89.2615	0.0281749	107.32	14409000
PF3D7_0915400	690	690	PF3D7_0915400	ATP-dependent 6-phosphofructokinase	>PF3D7_0915400 organism=Plasmodium_falciparum_3D7 product=6-phosphofructokinase (PFK9) location=Pf3D7_09_v3:650585-654841(-) length=1418 sequence_SO=chromosome SO=protein_coding	1	K	DDKARDGGSSPTSSAKKTKYNLSDDNNNNNN	11	.....AK......	motif5	0.951295	DGGSSPTSSAK(0.951)K(0.049)	FALSE	DGGSSPTSSAK(12.91)K(-12.91)	2	0.25475	12.9074	0.00193747	67.997	53.317	61.932																0.951295	12.9074	0.00193747	67.997	9839600
PF3D7_0916700	196	196	PF3D7_0916700	RNA-binding protein musashi, putative	>PF3D7_0916700 organism=Plasmodium_falciparum_3D7 product=RNA-binding protein musashi, putative (HoMu) location=Pf3D7_09_v3:696863-698029(-) length=388 sequence_SO=chromosome SO=protein_coding	1	K	KGYGFVTFKYVESVQKCLKSSHTLDNKELQV	7			0.998618	YVESVQK(0.999)CLK(0.001)	FALSE	YVESVQK(28.59)CLK(-28.59)	2	-0.18029	28.5879	0.00405681	88.495	58.752	88.495																0.998618	28.5879	0.00602183	88.495	16043000
PF3D7_0916700	181	181	PF3D7_0916700	RNA-binding protein musashi, putative	>PF3D7_0916700 organism=Plasmodium_falciparum_3D7 product=RNA-binding protein musashi, putative (HoMu) location=Pf3D7_09_v3:696863-698029(-) length=388 sequence_SO=chromosome SO=protein_coding	1	K	EIEDGIIVREKEGRSKGYGFVTFKYVESVQK	2	......K..G...	motif9	0.999998	SK(1)GYGFVTFK	FALSE	SK(56.5)GYGFVTFK(-56.5)	2	-2.0531	56.5045	0.0173793	58.172	30.918	58.172																0.999998	56.5045	0.0173793	58.172
PF3D7_0916700	305	305	PF3D7_0916700	RNA-binding protein musashi, putative	>PF3D7_0916700 organism=Plasmodium_falciparum_3D7 product=RNA-binding protein musashi, putative (HoMu) location=Pf3D7_09_v3:696863-698029(-) length=388 sequence_SO=chromosome SO=protein_coding	1	K	NRVVFLHFAVSQNLKKYQNNQNYVKKNQNFN	1	......K.Q....	motif7	1	K(1)YQNNQNYVK	FALSE	K(96.46)YQNNQNYVK(-96.46)	2	1.1845	96.463	0.00125732	111.61	61.567	111.61																1	96.463	0.00125732	111.61	10024000
PF3D7_0917300	5	5	PF3D7_0917300	conserved protein, unknown function	>PF3D7_0917300 organism=Plasmodium_falciparum_3D7 product=conserved Plasmodium membrane protein, unknown function location=Pf3D7_09_v3:718521-719540(+) length=339 sequence_SO=chromosome SO=protein_coding	1	K	___________MDYTKNKKNGNIGHMIKEFY	5			0.878533	MDYTK(0.879)NK(0.114)K(0.007)	FALSE	MDYTK(8.86)NK(-8.86)K(-20.91)	2	-0.71359	8.8554	0.00216623	131.03	95.831	131.03																0.878533	8.8554	0.00216623	131.03	31814000
PF3D7_0917900	443	443	PF3D7_0917900	heat shock protein 70	>PF3D7_0917900 organism=Plasmodium_falciparum_3D7 product=heat shock protein 70 (HSP70-2) location=Pf3D7_09_v3:737985-740276(+) length=652 sequence_SO=chromosome SO=protein_coding	1	K	IMTQLIKRNTVIPTKKSQTFSTYQDNQPAVL	1	......K.Q....	motif7	1	K(1)SQTFSTYQDNQPAVLIQVFEGER	FALSE	K(45.1)SQTFSTYQDNQPAVLIQVFEGER	3	0.024692	45.099	4.9705e-43	167.88	167.88	45.099											1	45.099	3.83893e-13	79.426	20684000	1	49.266	4.9705e-43	167.88	214870000
PF3D7_0917900	379	379	PF3D7_0917900	heat shock protein 70	>PF3D7_0917900 organism=Plasmodium_falciparum_3D7 product=heat shock protein 70 (HSP70-2) location=Pf3D7_09_v3:737985-740276(+) length=652 sequence_SO=chromosome SO=protein_coding	1	K	RIPKIQQIIKEFFNGKEPNRGINPDEAVAYG	6	.....GK......	motif4	1	EFFNGK(1)EPNR	FALSE	EFFNGK(74.84)EPNR	2	-0.60299	74.8411	0.00205465	107.21	81.088	74.841																1	74.8411	0.00205465	107.21
PF3D7_0917900	470	470	PF3D7_0917900	heat shock protein 70	>PF3D7_0917900 organism=Plasmodium_falciparum_3D7 product=heat shock protein 70 (HSP70-2) location=Pf3D7_09_v3:737985-740276(+) length=652 sequence_SO=chromosome SO=protein_coding	1	K	PAVLIQVFEGERALTKDNHLLGKFELSGIPP	4			0.999999	ALTK(1)DNHLLGK	FALSE	ALTK(59.43)DNHLLGK(-59.43)	3	-0.39466	59.426	0.000598004	72.434	50.105	72.434																0.999999	59.426	0.000598004	72.434	22412000
PF3D7_0917900	340	340	PF3D7_0917900	heat shock protein 70	>PF3D7_0917900 organism=Plasmodium_falciparum_3D7 product=heat shock protein 70 (HSP70-2) location=Pf3D7_09_v3:737985-740276(+) length=652 sequence_SO=chromosome SO=protein_coding	1	K	EELNDDLFRETLEPVKKVLDDAKYEKSKIDE	7	......K.....A	motif2	0.988335	ETLEPVK(0.988)K(0.012)	FALSE	ETLEPVK(19.28)K(-19.28)	2	-0.10176	19.2803	0.0270329	73.248	26.166	73.248																0.988335	19.2803	0.0270329	73.248	15345000
PF3D7_0918700	265	265	PF3D7_0918700	conserved Plasmodium protein, unknown function	>PF3D7_0918700 organism=Plasmodium_falciparum_3D7 product=conserved Plasmodium protein, unknown function location=Pf3D7_09_v3:769452-772105(+) length=737 sequence_SO=chromosome SO=protein_coding	1	K	DSALINSDMLGKNFEKDINKKRESVKIDSDN	4			0.999846	NFEK(1)DINK	FALSE	NFEK(38.12)DINK(-38.12)	2	0.017221	38.1247	0.0321101	83.206	8.0969	83.206																0.999846	38.1247	0.0321101	83.206	5433300
PF3D7_0919100	268	268	PF3D7_0919100	DnaJ protein, putative	>PF3D7_0919100 organism=Plasmodium_falciparum_3D7 product=DnaJ protein, putative location=Pf3D7_09_v3:786156-788212(+) length=370 sequence_SO=chromosome SO=protein_coding	1	K	ESTNYLKKNGEKLVTKLQQIRKGEASSQLNL	4	......K.Q....	motif7	1	LVTK(1)LQQIR	FALSE	LVTK(74.92)LQQIR	2	-0.11843	74.9199	0.00795951	74.92	23.133	74.92																1	51.0593	0.00795951	68.224	1838400
PF3D7_0919100	307	307	PF3D7_0919100	DnaJ protein, putative	>PF3D7_0919100 organism=Plasmodium_falciparum_3D7 product=DnaJ protein, putative location=Pf3D7_09_v3:786156-788212(+) length=370 sequence_SO=chromosome SO=protein_coding	1	K	EYLENGDKKNATVDSKLLSNVKEFALTLDSQ	7	.A....K......	motif11	0.999898	NATVDSK(1)LLSNVK	FALSE	NATVDSK(39.89)LLSNVK(-39.89)	2	-0.13195	39.8938	6.39667e-12	132.79	96.498	119.39																0.999898	39.8938	6.39667e-12	132.79	31537000
PF3D7_0919100	313	313	PF3D7_0919100	DnaJ protein, putative	>PF3D7_0919100 organism=Plasmodium_falciparum_3D7 product=DnaJ protein, putative location=Pf3D7_09_v3:786156-788212(+) length=370 sequence_SO=chromosome SO=protein_coding	1	K	DKKNATVDSKLLSNVKEFALTLDSQQISLLE	6	......K..A...	motif6	0.999933	LLSNVK(1)EFALTLDSQQISLLEK	FALSE	LLSNVK(41.76)EFALTLDSQQISLLEK(-41.76)	3	0.84159	41.7558	8.49332e-05	44.341	37.791	44.341																0.999933	41.7558	8.49332e-05	44.341	12058000
PF3D7_0920500	133	133	PF3D7_0920500	ADP-ribosylation factor, putative	>PF3D7_0920500 organism=Plasmodium_falciparum_3D7 product=ADP-ribosylation factor, putative location=Pf3D7_09_v3:841536-842655(+) length=191 sequence_SO=chromosome SO=protein_coding	1	K	DHVDNVLVVASKQDKKGCMTLDHVRKELKID	1	A.....K......	motif8	1	K(1)GCMTLDHVR	FALSE	K(46.8)GCMTLDHVR	3	-0.53697	46.7962	0.00452673	54.259	39.36	46.796																1	54.2593	0.00452673	54.259	5336900
PF3D7_0920800	335	335	PF3D7_0920800	inosine-5'-monophosphate dehydrogenase	>PF3D7_0920800 organism=Plasmodium_falciparum_3D7 product=inosine-5'-monophosphate dehydrogenase (IMPDH) location=Pf3D7_09_v3:852525-854057(-) length=510 sequence_SO=chromosome SO=protein_coding	1	K	CAVGRAQGTAVYHVSKYAHTRNIKTIADGGI	11	......K.A....	motif1	1	AQGTAVYHVSK(1)YAHTR	FALSE	AQGTAVYHVSK(66.02)YAHTR	3	-0.051935	66.0216	1.55876e-05	66.022	53.23	66.022																1	66.0216	1.55876e-05	66.022	9172400
PF3D7_0921000.1;PF3D7_0921000.2		153	PF3D7_0921000.1	ubiquitin-conjugating enzyme E2, putative	>PF3D7_0921000.1 organism=Plasmodium_falciparum_3D7 product=ubiquitin-conjugating enzyme, putative location=Pf3D7_09_v3:857587-858829(-) length=163 sequence_SO=chromosome SO=protein_coding;>PF3D7_0921000.2 organism=Plasmodium_falciparum_3D7 product=ubiqui	1	K	NVDAAVQLKNNIHEYKSKVRALARMC_____	7			0.998299	NNIHEYK(0.998)SK(0.002)	FALSE	NNIHEYK(27.68)SK(-27.68)	2	-0.3754	27.6849	0.00470414	114.97	114.97	96.342																0.998299	27.6849	0.00470414	114.97	8121300
PF3D7_0922100	313	313	PF3D7_0922100	ubiquitin-like protein, putative	>PF3D7_0922100 organism=Plasmodium_falciparum_3D7 product=ubiquitin-like protein, putative location=Pf3D7_09_v3:895415-900304(+) length=1542 sequence_SO=chromosome SO=protein_coding	1	K	NFIQNGKKDNKQRNVKEEEILEEEKSTNQRD	3			1	NVK(1)EEEILEEEK	FALSE	NVK(104.65)EEEILEEEK(-104.65)	2	0.64246	104.655	0.000541829	116.24	52.117	116.24																1	104.655	0.000541829	116.24	9936400
PF3D7_0922100	334	334	PF3D7_0922100	ubiquitin-like protein, putative	>PF3D7_0922100 organism=Plasmodium_falciparum_3D7 product=ubiquitin-like protein, putative location=Pf3D7_09_v3:895415-900304(+) length=1542 sequence_SO=chromosome SO=protein_coding	1	K	EEEKSTNQRDYYKDNKNDTKIYDEEQDDKHK	7			0.996687	DYYK(0.003)DNK(0.997)NDTK	FALSE	DYYK(-24.84)DNK(24.84)NDTK(-43.68)	2	0.35009	24.8399	1.01333e-08	178.71	146.83	152.4											0.994802	22.824	1.01333e-08	178.71		0.996687	24.8399	8.51834e-08	170.18	74481000
PF3D7_0922100	392	392	PF3D7_0922100	ubiquitin-like protein, putative	>PF3D7_0922100 organism=Plasmodium_falciparum_3D7 product=ubiquitin-like protein, putative location=Pf3D7_09_v3:895415-900304(+) length=1542 sequence_SO=chromosome SO=protein_coding	1	K	KKYKSDEKKLENYDEKENLEKKQKRKNKVND	8			0.999997	KLENYDEK(1)ENLEK	FALSE	K(-79.22)LENYDEK(55.66)ENLEK(-55.66)	3	0.22117	55.6593	2.93227e-05	126.1	91.833	126.1																0.999997	55.6593	2.93227e-05	126.1	26709000
PF3D7_0922100	331	331	PF3D7_0922100	ubiquitin-like protein, putative	>PF3D7_0922100 organism=Plasmodium_falciparum_3D7 product=ubiquitin-like protein, putative location=Pf3D7_09_v3:895415-900304(+) length=1542 sequence_SO=chromosome SO=protein_coding	1	K	EILEEEKSTNQRDYYKDNKNDTKIYDEEQDD	4			0.998865	DYYK(0.999)DNK(0.001)NDTK	FALSE	DYYK(29.48)DNK(-29.48)NDTK(-50.22)	3	0.38333	29.4809	0.000674374	84.479	71.202	68.355																0.998865	29.4809	0.00210899	68.355	9197200
PF3D7_0922100	413	413	PF3D7_0922100	ubiquitin-like protein, putative	>PF3D7_0922100 organism=Plasmodium_falciparum_3D7 product=ubiquitin-like protein, putative location=Pf3D7_09_v3:895415-900304(+) length=1542 sequence_SO=chromosome SO=protein_coding	1	K	KQKRKNKVNDKKIYQKNEIRAKHEYNSNNSG	4			1	IYQK(1)NEIR	FALSE	IYQK(80.44)NEIR	2	-0.1829	80.4381	0.00710668	91.318	39.972	80.438																1	80.4381	0.00710668	91.318	15136000
PF3D7_0922100	287	287	PF3D7_0922100	ubiquitin-like protein, putative	>PF3D7_0922100 organism=Plasmodium_falciparum_3D7 product=ubiquitin-like protein, putative location=Pf3D7_09_v3:895415-900304(+) length=1542 sequence_SO=chromosome SO=protein_coding	1	K	EEKNQHKQNTETSLNKDNRGSSNSTSNFIQN	9			1	QNTETSLNK(1)DNR	FALSE	QNTETSLNK(166.04)DNR	2	-0.0099368	166.04	1.27451e-14	190.46	132.38	166.04											1	166.04	1.27451e-14	190.46	40058000
PF3D7_0922100	322	322	PF3D7_0922100	ubiquitin-like protein, putative	>PF3D7_0922100 organism=Plasmodium_falciparum_3D7 product=ubiquitin-like protein, putative location=Pf3D7_09_v3:895415-900304(+) length=1542 sequence_SO=chromosome SO=protein_coding	1	K	NKQRNVKEEEILEEEKSTNQRDYYKDNKNDT	12			0.999998	NVKEEEILEEEK(1)STNQR	FALSE	NVK(-57.8)EEEILEEEK(57.8)STNQR	3	-0.34364	57.7975	1.96153e-06	76.378	64.31	76.378																0.999998	57.7975	1.96153e-06	76.378	46442000
PF3D7_0922200	305	305	PF3D7_0922200	S-adenosylmethionine synthetase	>PF3D7_0922200 organism=Plasmodium_falciparum_3D7 product=S-adenosylmethionine synthetase (SAMS) location=Pf3D7_09_v3:903362-904570(+) length=402 sequence_SO=chromosome SO=protein_coding	1	K	AAYYLRFIAKSLVANKFCRRVLVQASYSIGI	6	....A.K......	motif10	1	SLVANK(1)FCR	FALSE	SLVANK(68.63)FCR	2	-0.02814	68.625	0.00724963	101.54	79.549	68.625																1	91.0686	0.00724963	101.54	14293000
PF3D7_0922200	261	261	PF3D7_0922200	S-adenosylmethionine synthetase	>PF3D7_0922200 organism=Plasmodium_falciparum_3D7 product=S-adenosylmethionine synthetase (SAMS) location=Pf3D7_09_v3:903362-904570(+) length=402 sequence_SO=chromosome SO=protein_coding	1	K	FVLGGPAADAGLTGRKIICDTYGGWGAHGGG	1	A.....K......	motif8	1	K(1)IICDTYGGWGAHGGGAFSGK	FALSE	K(85.89)IICDTYGGWGAHGGGAFSGK(-85.89)	4	0.011837	85.8875	1.26876e-22	134.87	121.02	88.176						1	66.2151	5.50E-09	68.639	3804600						1	85.8875	1.26876e-22	134.87	83551000
PF3D7_0922200	184	184	PF3D7_0922200	S-adenosylmethionine synthetase	>PF3D7_0922200 organism=Plasmodium_falciparum_3D7 product=S-adenosylmethionine synthetase (SAMS) location=Pf3D7_09_v3:903362-904570(+) length=402 sequence_SO=chromosome SO=protein_coding	1	K	LGPDGKTQITIEYKNKGSCGGHLEPLRVHTV	2			1	NK(1)GSCGGHLEPLR	FALSE	NK(91.62)GSCGGHLEPLR	3	-0.95083	91.6203	6.53753e-22	196.74	142.68	91.62	1	70.8885	6.08E-05	95.428	133960000	1	51.6434	2.77E-07	166.03	1112400000	1	65.8954	0.000160379	71.879	62191000	1	75.7641	6.53753e-22	196.74	6483200000
PF3D7_0922200	391	391	PF3D7_0922200	S-adenosylmethionine synthetase	>PF3D7_0922200 organism=Plasmodium_falciparum_3D7 product=S-adenosylmethionine synthetase (SAMS) location=Pf3D7_09_v3:903362-904570(+) length=402 sequence_SO=chromosome SO=protein_coding	1	K	GHFGREGDTFTWEKIKDLSHEKNALKN____	2			1	IK(1)DLSHEK	FALSE	IK(110.67)DLSHEK(-110.67)	2	-0.62425	110.665	0.00324332	126.55	38.253	126.55																1	110.665	0.00324332	126.55	68377000
PF3D7_0922200	74	74	PF3D7_0922200	S-adenosylmethionine synthetase	>PF3D7_0922200 organism=Plasmodium_falciparum_3D7 product=S-adenosylmethionine synthetase (SAMS) location=Pf3D7_09_v3:903362-904570(+) length=402 sequence_SO=chromosome SO=protein_coding		K	FIFGEITTKAKVNYDKVTRDVLKHIGYDDES	5	A.....K......	motif8	1	VNYDK(1)VTR	FALSE	VNYDK(99.44)VTR	2	-0.28397	99.4417	0.021122	99.442	74.666	99.442						1	99.4417	0.021122	99.442	9329400	1	58.4333	0.0366577	58.433		1	88.3697	0.0276924	90.601	257020000
PF3D7_0922200	54	54	PF3D7_0922200	S-adenosylmethionine synthetase	>PF3D7_0922200 organism=Plasmodium_falciparum_3D7 product=S-adenosylmethionine synthetase (SAMS) location=Pf3D7_09_v3:903362-904570(+) length=402 sequence_SO=chromosome SO=protein_coding	1	K	LREDPYSKVACEVCAKKNYIFIFGEITTKAK	8	.....AK......	motif5	0.945221	VACEVCAK(0.945)K(0.055)	FALSE	VACEVCAK(12.37)K(-12.37)	2	-0.54577	12.3692	0.00116578	133.23	92.883	117.89						0.917131	10.4404	0.00231577	120.15	50910000	0.917131	10.4404	0.00231577	120.15	57781000	0.945221	12.3692	0.00231577	120.15	165690000
PF3D7_0922200	5	5	PF3D7_0922200	S-adenosylmethionine synthetase	>PF3D7_0922200 organism=Plasmodium_falciparum_3D7 product=S-adenosylmethionine synthetase (SAMS) location=Pf3D7_09_v3:903362-904570(+) length=402 sequence_SO=chromosome SO=protein_coding	1	K	___________MSQLKIKRGNFLFTSESVNE	4			0.997727	SQLK(0.998)IK(0.002)R	FALSE	SQLK(26.43)IK(-26.43)R	2	0.16743	26.425	0.0217995	94.262	12.478	89.142						0.99678	24.9069	0.023222	91.9	125390000						0.997727	26.425	0.0217995	94.262	549510000
PF3D7_0922200	397	397	PF3D7_0922200	S-adenosylmethionine synthetase	>PF3D7_0922200 organism=Plasmodium_falciparum_3D7 product=S-adenosylmethionine synthetase (SAMS) location=Pf3D7_09_v3:903362-904570(+) length=402 sequence_SO=chromosome SO=protein_coding	1	K	GDTFTWEKIKDLSHEKNALKN__________	8			0.999764	IKDLSHEK(1)NALK	FALSE	IK(-40.77)DLSHEK(38.18)NALK(-38.18)	3	0.12303	38.179	0.000191191	104.24	37.255	77.185																0.999764	38.179	0.000224018	82.85	88321000
PF3D7_0922200	299	299	PF3D7_0922200	S-adenosylmethionine synthetase	>PF3D7_0922200 organism=Plasmodium_falciparum_3D7 product=S-adenosylmethionine synthetase (SAMS) location=Pf3D7_09_v3:903362-904570(+) length=402 sequence_SO=chromosome SO=protein_coding	1	K	SKVDRSAAYYLRFIAKSLVANKFCRRVLVQA	4	.....AK......	motif5	0.999999	FIAK(1)SLVANK	FALSE	FIAK(60.82)SLVANK(-60.82)	2	-0.14349	60.8168	0.00207579	111.27	21.38	94.692						0.999999	60.8168	0.00211773	111.27	38461000						0.999998	57.5962	0.00207579	104.82	53751000
PF3D7_0922200	230	230	PF3D7_0922200	S-adenosylmethionine synthetase	>PF3D7_0922200 organism=Plasmodium_falciparum_3D7 product=S-adenosylmethionine synthetase (SAMS) location=Pf3D7_09_v3:903362-904570(+) length=402 sequence_SO=chromosome SO=protein_coding	1	K	KTDLMENVIKYVIPEKLLDNETLYYLNPSGK	6			1	YVIPEK(1)LLDNETLYYLNPSGK	FALSE	YVIPEK(82.88)LLDNETLYYLNPSGK(-82.88)	3	-0.1873	82.8766	1.31387e-22	133.21	123.06	130.56						0.999997	54.9249	2.63E-12	84.249	33477000						1	82.8766	1.31387e-22	133.21	292650000
PF3D7_0922200	162	162	PF3D7_0922200	S-adenosylmethionine synthetase	>PF3D7_0922200 organism=Plasmodium_falciparum_3D7 product=S-adenosylmethionine synthetase (SAMS) location=Pf3D7_09_v3:903362-904570(+) length=402 sequence_SO=chromosome SO=protein_coding	1	K	HHYATLLGKRLTEVRKLGILPYLGPDGKTQI	1			1	K(1)LGILPYLGPDGK	FALSE	K(70.89)LGILPYLGPDGK(-70.89)	2	0.35884	70.8885	0.000916803	73.877	37.585	70.889											1	70.8885	0.00114561	70.889	5172800	1	73.8051	0.000916803	73.877	9904400
PF3D7_0922200	81	81	PF3D7_0922200	S-adenosylmethionine synthetase	>PF3D7_0922200 organism=Plasmodium_falciparum_3D7 product=S-adenosylmethionine synthetase (SAMS) location=Pf3D7_09_v3:903362-904570(+) length=402 sequence_SO=chromosome SO=protein_coding	1	K	TKAKVNYDKVTRDVLKHIGYDDESKGLDYKT	4	......K..G...	motif9	0.999989	DVLK(1)HIGYDDESK	FALSE	DVLK(49.53)HIGYDDESK(-49.53)	3	-0.86795	49.5273	0.00049008	61.11	51.038	61.11																0.999989	49.5273	0.00049008	61.11	16018000
PF3D7_0922200	69	69	PF3D7_0922200	S-adenosylmethionine synthetase	>PF3D7_0922200 organism=Plasmodium_falciparum_3D7 product=S-adenosylmethionine synthetase (SAMS) location=Pf3D7_09_v3:903362-904570(+) length=402 sequence_SO=chromosome SO=protein_coding		K	KKNYIFIFGEITTKAKVNYDKVTRDVLKHIG	2	.....AK......	motif5	1	AK(1)VNYDK(1)VTR	FALSE	AK(65.84)VNYDK(65.84)VTR	3	-0.095677	65.8417	0.00123443	108.46	47.673	65.842						1	80.2867	0.0478066	108.46							1	65.8417	0.0204823	65.842	28795000
PF3D7_0922200	210	210	PF3D7_0922200	S-adenosylmethionine synthetase	>PF3D7_0922200 organism=Plasmodium_falciparum_3D7 product=S-adenosylmethionine synthetase (SAMS) location=Pf3D7_09_v3:903362-904570(+) length=402 sequence_SO=chromosome SO=protein_coding	1	K	RVHTVLISTQHAEDIKYEQLKTDLMENVIKY	15	..A...K......	motif11	0.999915	VHTVLISTQHAEDIK(1)YEQLK	FALSE	VHTVLISTQHAEDIK(40.68)YEQLK(-40.68)	4	0.20343	40.6803	6.44655e-23	141.07	125.91	99.392																0.999915	40.6803	3.4986e-22	135.08	366310000
PF3D7_0922200	95	95	PF3D7_0922200	S-adenosylmethionine synthetase	>PF3D7_0922200 organism=Plasmodium_falciparum_3D7 product=S-adenosylmethionine synthetase (SAMS) location=Pf3D7_09_v3:903362-904570(+) length=402 sequence_SO=chromosome SO=protein_coding	1	K	LKHIGYDDESKGLDYKTAEIKVSIDEQSPDI	5	......K.A....	motif1	0.997906	GLDYK(0.998)TAEIK(0.002)	FALSE	GLDYK(26.78)TAEIK(-26.78)	2	0.47951	26.7804	0.0200744	56.548	38.728	56.548											0.997906	26.7804	0.0200744	56.548
PF3D7_0922200	281	281	PF3D7_0922200	S-adenosylmethionine synthetase	>PF3D7_0922200 organism=Plasmodium_falciparum_3D7 product=S-adenosylmethionine synthetase (SAMS) location=Pf3D7_09_v3:903362-904570(+) length=402 sequence_SO=chromosome SO=protein_coding	1	K	TYGGWGAHGGGAFSGKDASKVDRSAAYYLRF	21	......K.A....	motif1	0.950308	KIICDTYGGWGAHGGGAFSGK(0.95)DASK(0.049)	FALSE	K(-35.47)IICDTYGGWGAHGGGAFSGK(12.84)DASK(-12.84)	4	-0.37938	12.8394	3.03973e-06	45.735	43.167	45.735																0.950308	12.8394	3.03973e-06	45.735	9274500
PF3D7_0922200	46	46	PF3D7_0922200	S-adenosylmethionine synthetase	>PF3D7_0922200 organism=Plasmodium_falciparum_3D7 product=S-adenosylmethionine synthetase (SAMS) location=Pf3D7_09_v3:903362-904570(+) length=402 sequence_SO=chromosome SO=protein_coding	1	K	SDAILDSCLREDPYSKVACEVCAKKNYIFIF	6	......K.A....	motif1	0.999798	EDPYSK(1)VACEVCAK	FALSE	EDPYSK(36.95)VACEVCAK(-36.95)	3	-0.013764	36.9482	0.0017639	43.03	33.187	43.03																0.999798	36.9482	0.0017639	43.03	4224000
PF3D7_0922200	371	371	PF3D7_0922200	S-adenosylmethionine synthetase	>PF3D7_0922200 organism=Plasmodium_falciparum_3D7 product=S-adenosylmethionine synthetase (SAMS) location=Pf3D7_09_v3:903362-904570(+) length=402 sequence_SO=chromosome SO=protein_coding	1	K	GFIIQELKLTEPVFSKTSAYGHFGREGDTFT	8	......K..A...	motif6	1	LTEPVFSK(1)TSAYGHFGR	FALSE	LTEPVFSK(46.89)TSAYGHFGR	4	-0.57004	46.8897	6.77895e-06	66.387	55.272	46.89																1	46.8897	6.77895e-06	66.387	35522000
PF3D7_0922200	155	155	PF3D7_0922200	S-adenosylmethionine synthetase	>PF3D7_0922200 organism=Plasmodium_falciparum_3D7 product=S-adenosylmethionine synthetase (SAMS) location=Pf3D7_09_v3:903362-904570(+) length=402 sequence_SO=chromosome SO=protein_coding	1	K	ENYMPLTHHYATLLGKRLTEVRKLGILPYLG	37	.....GK......	motif4	1	SPELIGAGDQGIMFGYATDETENYMPLTHHYATLLGK(1)R	FALSE	SPELIGAGDQGIMFGYATDETENYMPLTHHYATLLGK(48.65)R	4	-0.66521	48.6501	2.23144e-39	95.198	93.185	48.65																1	48.6501	2.23144e-39	95.198	37518000
PF3D7_0922200	174	174	PF3D7_0922200	S-adenosylmethionine synthetase	>PF3D7_0922200 organism=Plasmodium_falciparum_3D7 product=S-adenosylmethionine synthetase (SAMS) location=Pf3D7_09_v3:903362-904570(+) length=402 sequence_SO=chromosome SO=protein_coding	1	K	EVRKLGILPYLGPDGKTQITIEYKNKGSCGG	12	.....GK......	motif4	0.999669	LGILPYLGPDGK(1)TQITIEYK	FALSE	LGILPYLGPDGK(34.8)TQITIEYK(-34.8)	3	-0.45225	34.7979	0.000172053	46.461	40.792	46.461																0.999669	34.7979	0.000172053	46.461	9551200
PF3D7_0922200	245	245	PF3D7_0922200	S-adenosylmethionine synthetase	>PF3D7_0922200 organism=Plasmodium_falciparum_3D7 product=S-adenosylmethionine synthetase (SAMS) location=Pf3D7_09_v3:903362-904570(+) length=402 sequence_SO=chromosome SO=protein_coding	1	K	KLLDNETLYYLNPSGKFVLGGPAADAGLTGR	15	.....GK......	motif4	1	LLDNETLYYLNPSGK(1)FVLGGPAADAGLTGR	FALSE	LLDNETLYYLNPSGK(66.29)FVLGGPAADAGLTGR	3	0.17619	66.2945	1.86703e-12	66.294	61.701	66.294																1	66.2945	1.86703e-12	66.294	38658000
PF3D7_0922200	363	363	PF3D7_0922200	S-adenosylmethionine synthetase	>PF3D7_0922200 organism=Plasmodium_falciparum_3D7 product=S-adenosylmethionine synthetase (SAMS) location=Pf3D7_09_v3:903362-904570(+) length=402 sequence_SO=chromosome SO=protein_coding	1	K	LRNFDLRPGFIIQELKLTEPVFSKTSAYGHF	14			0.99997	NFDLRPGFIIQELK(1)LTEPVFSK	FALSE	NFDLRPGFIIQELK(45.22)LTEPVFSK(-45.22)	3	-0.34588	45.2218	5.06865e-11	75.064	66.388	75.064																0.99997	45.2218	5.06865e-11	75.064	16085000
PF3D7_0922200	90	90	PF3D7_0922200	S-adenosylmethionine synthetase	>PF3D7_0922200 organism=Plasmodium_falciparum_3D7 product=S-adenosylmethionine synthetase (SAMS) location=Pf3D7_09_v3:903362-904570(+) length=402 sequence_SO=chromosome SO=protein_coding	1	K	VTRDVLKHIGYDDESKGLDYKTAEIKVSIDE	9			0.996619	HIGYDDESK(0.997)GLDYK(0.003)	FALSE	HIGYDDESK(24.69)GLDYK(-24.69)	3	1.0215	24.695	0.00153288	45.28	30.292	45.28																0.996619	24.695	0.00153288	45.28	5030000
PF3D7_0922500	219	219	PF3D7_0922500	phosphoglycerate kinase	>PF3D7_0922500 organism=Plasmodium_falciparum_3D7 product=phosphoglycerate kinase (PGK) location=Pf3D7_09_v3:913230-914480(+) length=416 sequence_SO=chromosome SO=protein_coding	1	K	QRPLLAILGGAKVSDKIQLIKNLLDKVDRMI	4	......K.Q....	motif7	1	VSDK(1)IQLIK	FALSE	VSDK(83.86)IQLIK(-83.86)	2	0.31089	83.8558	0.00513835	109.66	38.213	109.66																1	83.8558	0.00513835	109.66	9453100
PF3D7_0922500	106	106	PF3D7_0922500	phosphoglycerate kinase	>PF3D7_0922500 organism=Plasmodium_falciparum_3D7 product=phosphoglycerate kinase (PGK) location=Pf3D7_09_v3:913230-914480(+) length=416 sequence_SO=chromosome SO=protein_coding	1	K	EVLFLNDCVGKEVEDKINAAKENSVILLENL	5	......K..A...	motif6	0.999771	EVEDK(1)INAAK	FALSE	EVEDK(36.39)INAAK(-36.39)	2	-0.31172	36.394	0.0052575	90.15	32.561	90.15																0.999771	36.394	0.0052575	90.15	2873300
PF3D7_0922500	140	140	PF3D7_0922500	phosphoglycerate kinase	>PF3D7_0922500 organism=Plasmodium_falciparum_3D7 product=phosphoglycerate kinase (PGK) location=Pf3D7_09_v3:913230-914480(+) length=416 sequence_SO=chromosome SO=protein_coding	1	K	IEEEGKGVDANGNKVKANKEDVEKFQNDLTK	2	......KA.....	motif3	0.999612	VK(1)ANKEDVEK	FALSE	VK(34.11)ANK(-34.11)EDVEK(-90.47)	3	-0.19617	34.1095	0.000806581	97.734	50.131	97.734																0.999612	34.1095	0.000806581	97.734	47085000
PF3D7_0922500	138	138	PF3D7_0922500	phosphoglycerate kinase	>PF3D7_0922500 organism=Plasmodium_falciparum_3D7 product=phosphoglycerate kinase (PGK) location=Pf3D7_09_v3:913230-914480(+) length=416 sequence_SO=chromosome SO=protein_coding	1	K	FHIEEEGKGVDANGNKVKANKEDVEKFQNDL	16	......K..A...	motif6	0.991625	FHIEEEGK(0.001)GVDANGNK(0.992)VK(0.008)	FALSE	FHIEEEGK(-31.35)GVDANGNK(21.13)VK(-21.13)	4	-0.02699	21.1281	4.59812e-07	101.65	48.93	74.296						0.984558	18.0453	0.00287137	100.02	7765900						0.991625	21.1281	4.59812e-07	101.65	6975400
PF3D7_0922500	74	74	PF3D7_0922500	phosphoglycerate kinase	>PF3D7_0922500 organism=Plasmodium_falciparum_3D7 product=phosphoglycerate kinase (PGK) location=Pf3D7_09_v3:913230-914480(+) length=416 sequence_SO=chromosome SO=protein_coding	1	K	ILISHCGRPDGLRNEKYTLKPVAETLKGLLG	3			0.999992	NEK(1)YTLKPVAETLK	FALSE	NEK(51.11)YTLK(-51.11)PVAETLK(-99.65)	3	-0.17172	51.1117	2.67055e-06	115.91	86.366	115.91																0.999992	51.1117	2.67055e-06	115.91	23031000
PF3D7_0924400	1176	1176	PF3D7_0924400	conserved Plasmodium protein, unknown function	>PF3D7_0924400 organism=Plasmodium_falciparum_3D7 product=conserved Plasmodium protein, unknown function location=Pf3D7_09_v3:988977-992915(+) length=1245 sequence_SO=chromosome SO=protein_coding	1	K	LNKTPTQTEIGQENYKKEGNYFDKPLDNMNS	13	......K..G...	motif9	0.970572	TPTQTEIGQENYK(0.971)K(0.029)	FALSE	TPTQTEIGQENYK(15.18)K(-15.18)	3	-0.69576	15.1827	4.55522e-05	88.224	70.971	82.202																0.970572	15.1827	4.55522e-05	88.224	23334000
PF3D7_0925700	365	365	PF3D7_0925700	histone deacetylase 1	>PF3D7_0925700 organism=Plasmodium_falciparum_3D7 product=histone deacetylase 1 (HDAC1) location=Pf3D7_09_v3:1028661-1030010(-) length=449 sequence_SO=chromosome SO=protein_coding	1	K	IPNYNSPEHLSRIKMKIAENLRHIEHAPGVQ	2	......K.A....	motif1	1	MK(1)IAENLR	FALSE	MK(50.04)IAENLR	3	-0.23791	50.0403	0.00832447	50.04	25.265	50.04																1	50.0403	0.00832447	50.04
PF3D7_0926600	751	751	PF3D7_0926600	conserved Plasmodium membrane protein, unknown function	>PF3D7_0926600 organism=Plasmodium_falciparum_3D7 product=conserved Plasmodium membrane protein, unknown function location=Pf3D7_09_v3:1084696-1089093(+) length=1378 sequence_SO=chromosome SO=protein_coding	3	K	SNVQEPDDVIHRKISKFQINKSVKTQNTLFS	3	......K.Q....	motif7	1	ISK(1)FQINK(1)SVK(1)	TRUE	ISK(55.31)FQINK(55.31)SVK(55.31)	2	-0.1351	55.3143	0.0202395	55.314	29.866	55.314	1	55.3143	0.0202395	55.314	24486000
PF3D7_0926600	759	759	PF3D7_0926600	conserved Plasmodium membrane protein, unknown function	>PF3D7_0926600 organism=Plasmodium_falciparum_3D7 product=conserved Plasmodium membrane protein, unknown function location=Pf3D7_09_v3:1084696-1089093(+) length=1378 sequence_SO=chromosome SO=protein_coding	3	K	VIHRKISKFQINKSVKTQNTLFSEESNENML	11	......K.Q....	motif7	1	ISK(1)FQINK(1)SVK(1)	TRUE	ISK(55.31)FQINK(55.31)SVK(55.31)	2	-0.1351	55.3143	0.0202395	55.314	29.866	55.314	1	55.3143	0.0202395	55.314	24486000
PF3D7_0926600	756	756	PF3D7_0926600	conserved Plasmodium membrane protein, unknown function	>PF3D7_0926600 organism=Plasmodium_falciparum_3D7 product=conserved Plasmodium membrane protein, unknown function location=Pf3D7_09_v3:1084696-1089093(+) length=1378 sequence_SO=chromosome SO=protein_coding	3	K	PDDVIHRKISKFQINKSVKTQNTLFSEESNE	8			1	ISK(1)FQINK(1)SVK(1)	TRUE	ISK(55.31)FQINK(55.31)SVK(55.31)	2	-0.1351	55.3143	0.0202395	55.314	29.866	55.314	1	55.3143	0.0202395	55.314	24486000
PF3D7_0929400	359	359	PF3D7_0929400	high molecular weight rhoptry protein 2	>PF3D7_0929400 organism=Plasmodium_falciparum_3D7 product=high molecular weight rhoptry protein 2 (RhopH2) location=Pf3D7_09_v3:1175203-1180762(+) length=1378 sequence_SO=chromosome SO=protein_coding	1	K	NLSRYIDIKKELNDEKAYKQLMSAIRKYVTT	6	......KA.....	motif3	0.99998	ELNDEK(1)AYK	FALSE	ELNDEK(46.92)AYK(-46.92)	2	0.46772	46.924	0.00206336	138.98	31.401	138.98						0.999891	39.626	0.00442292	117.89	59019000	0.999765	36.2813	0.00206336	134.25	92155000	0.99998	46.924	0.00250672	138.98	48461000
PF3D7_0929400	370	370	PF3D7_0929400	high molecular weight rhoptry protein 2	>PF3D7_0929400 organism=Plasmodium_falciparum_3D7 product=high molecular weight rhoptry protein 2 (RhopH2) location=Pf3D7_09_v3:1175203-1180762(+) length=1378 sequence_SO=chromosome SO=protein_coding	1	K	LNDEKAYKQLMSAIRKYVTTLTKADSDITYF	1			1	K(1)YVTTLTK	FALSE	K(147.14)YVTTLTK(-147.14)	2	-0.06098	147.139	0.00276856	168.83	34.581	152.34											1	147.139	0.00276856	168.83	60272000	1	74.9199	0.0253669	74.92	2544500
PF3D7_0931400	101	101	PF3D7_0931400	PUB domain-containing protein, putative	>PF3D7_0931400 organism=Plasmodium_falciparum_3D7 product=conserved Plasmodium protein, unknown function location=Pf3D7_09_v3:1263347-1264830(+) length=310 sequence_SO=chromosome SO=protein_coding	1	K	TSCEKMSKLSPEEAQKKALELQKKIREKKLL	8	......K.A....	motif1	0.895555	LSPEEAQK(0.896)K(0.104)	FALSE	LSPEEAQK(9.33)K(-9.33)	2	0.32016	9.33206	0.0122029	74.173	44.429	74.173																0.895555	9.33206	0.014507	74.173
PF3D7_0931400	23	23	PF3D7_0931400	PUB domain-containing protein, putative	>PF3D7_0931400 organism=Plasmodium_falciparum_3D7 product=conserved Plasmodium protein, unknown function location=Pf3D7_09_v3:1263347-1264830(+) length=310 sequence_SO=chromosome SO=protein_coding	1	K	VEQLVEMGYSKEISQKVIQKSGAKTIEDAIS	5			0.999992	EISQK(1)VIQK	FALSE	EISQK(50.99)VIQK(-50.99)	2	0.099419	50.9928	0.0267781	72.038	23.244	68.224																0.999992	50.9928	0.0308575	68.224	4748200
PF3D7_0931400	27	27	PF3D7_0931400	PUB domain-containing protein, putative	>PF3D7_0931400 organism=Plasmodium_falciparum_3D7 product=conserved Plasmodium protein, unknown function location=Pf3D7_09_v3:1263347-1264830(+) length=310 sequence_SO=chromosome SO=protein_coding	1	K	VEMGYSKEISQKVIQKSGAKTIEDAISWIEL	4	......K..A...	motif6	0.999761	VIQK(1)SGAK	FALSE	VIQK(36.21)SGAK(-36.21)	2	0.39158	36.2149	0.0148097	81.296	14.303	81.296																0.999761	36.2149	0.0148097	81.296
PF3D7_0931400	102	102	PF3D7_0931400	PUB domain-containing protein, putative	>PF3D7_0931400 organism=Plasmodium_falciparum_3D7 product=conserved Plasmodium protein, unknown function location=Pf3D7_09_v3:1263347-1264830(+) length=310 sequence_SO=chromosome SO=protein_coding	1	K	SCEKMSKLSPEEAQKKALELQKKIREKKLLK	1	......KA.....	motif3	1	K(1)ALELQK	FALSE	K(97.6)ALELQK(-97.6)	2	1.2584	97.6019	0.0054117	97.635	66.948	97.602																1	97.6019	0.0054117	97.635	3374500
PF3D7_0932000	5	5	PF3D7_0932000	conserved Plasmodium protein, unknown function	>PF3D7_0932000 organism=Plasmodium_falciparum_3D7 product=conserved Plasmodium protein, unknown function location=Pf3D7_09_v3:1278007-1278896(+) length=102 sequence_SO=chromosome SO=protein_coding	1	K	___________MTLKKIYNGHFRRVPSSSEK	1			1	K(1)IYNGHFR	FALSE	K(47.08)IYNGHFR	3	0.23096	47.0817	0.0056911	67.981	48.887	47.082																1	67.9808	0.0056911	67.981	4640500
PF3D7_0932100	53	53	PF3D7_0932100	protein MAM3, putative	>PF3D7_0932100 organism=Plasmodium_falciparum_3D7 product=protein MAM3, putative location=Pf3D7_09_v3:1279219-1283879(-) length=1274 sequence_SO=chromosome SO=protein_coding	1	K	LILVSEKNKKEINNAKNARKILPLRNNTNEI	6	......K.A....	motif1	1	EINNAK(1)NAR	FALSE	EINNAK(70.86)NAR	2	0.37578	70.8559	0.0280425	70.856	41.706	70.856																1	70.8559	0.0280425	70.856	9926900
PF3D7_0934700	242	242	PF3D7_0934700	UBX domain-containing protein, putative	>PF3D7_0934700 organism=Plasmodium_falciparum_3D7 product=UBX domain, putative location=Pf3D7_09_v3:1357411-1359262(+) length=531 sequence_SO=chromosome SO=protein_coding	1	K	SYDNGFTKYYENKYSKVHTDFFRGSLKEAIN	3			1	YSK(1)VHTDFFR	FALSE	YSK(67.33)VHTDFFR	3	-0.19422	67.3338	0.000255576	99.973	89.048	67.334																1	80.706	0.000255576	99.973	48931000
PF3D7_0934700	253	253	PF3D7_0934700	UBX domain-containing protein, putative	>PF3D7_0934700 organism=Plasmodium_falciparum_3D7 product=UBX domain, putative location=Pf3D7_09_v3:1357411-1359262(+) length=531 sequence_SO=chromosome SO=protein_coding	1	K	NKYSKVHTDFFRGSLKEAINKSRREEKLLLV	4	......K.A....	motif1	1	GSLK(1)EAINK	FALSE	GSLK(86.36)EAINK(-86.36)	2	0.2403	86.362	0.00227664	148.94	35.055	148.94						0.999978	46.6357	0.0449644	61.78	6454400	0.999943	42.4645	0.0449644	61.78	2493900	1	86.362	0.00227664	148.94	71366000
PF3D7_0934700	239	239	PF3D7_0934700	UBX domain-containing protein, putative	>PF3D7_0934700 organism=Plasmodium_falciparum_3D7 product=UBX domain, putative location=Pf3D7_09_v3:1357411-1359262(+) length=531 sequence_SO=chromosome SO=protein_coding	1	K	YTSSYDNGFTKYYENKYSKVHTDFFRGSLKE	5			0.999869	YYENK(1)YSK	FALSE	YYENK(38.82)YSK(-38.82)	2	-0.24683	38.82	0.0225463	97.635	26.293	97.635																0.999869	38.82	0.0225463	97.635	20702000
PF3D7_0934800	263	263	PF3D7_0934800	cAMP-dependent protein kinase catalytic subunit	>PF3D7_0934800 organism=Plasmodium_falciparum_3D7 product=cAMP-dependent protein kinase catalytic subunit (PKAc) location=Pf3D7_09_v3:1361935-1363848(+) length=342 sequence_SO=chromosome SO=protein_coding	1	K	YFPKFLDNNCKHLMKKLLSHDLTKRYGNLKK	1			1	K(1)LLSHDLTK	FALSE	K(94.61)LLSHDLTK(-94.61)	2	0.63056	94.6139	0.00283645	113.93	49.215	96.113																1	113.926	0.00283645	113.93	27885000
PF3D7_0934800	251	251	PF3D7_0934800	cAMP-dependent protein kinase catalytic subunit	>PF3D7_0934800 organism=Plasmodium_falciparum_3D7 product=cAMP-dependent protein kinase catalytic subunit (PKAc) location=Pf3D7_09_v3:1361935-1363848(+) length=342 sequence_SO=chromosome SO=protein_coding	1	K	LLIYQKILEGIIYFPKFLDNNCKHLMKKLLS	10			0.97111	ILEGIIYFPK(0.971)FLDNNCK(0.029)	FALSE	ILEGIIYFPK(15.27)FLDNNCK(-15.27)	3	0.18498	15.2652	0.00095034	41.088	36.184	41.088																0.97111	15.2652	0.00095034	41.088	8567200
PF3D7_0935900	380	380	PF3D7_0935900	ring-exported protein 1	>PF3D7_0935900 organism=Plasmodium_falciparum_3D7 product=ring-exported protein 1 (REX1) location=Pf3D7_09_v3:1420483-1422807(-) length=713 sequence_SO=chromosome SO=protein_coding	1	K	DEQHELKPQAEKDASKLTTTYDQTKEVKPQA	4	A.....K......	motif8	1	DASK(1)LTTTYDQTK	FALSE	DASK(80.57)LTTTYDQTK(-80.57)	2	-0.22963	80.5705	0.000106318	134.61	114.03	89.46											1	80.5705	0.000106318	134.61	31873000
PF3D7_0935900	364	364	PF3D7_0935900	ring-exported protein 1	>PF3D7_0935900 organism=Plasmodium_falciparum_3D7 product=ring-exported protein 1 (REX1) location=Pf3D7_09_v3:1420483-1422807(-) length=713 sequence_SO=chromosome SO=protein_coding	1	K	LQIVYDENQAKTAQAKDEQHELKPQAEKDAS	5	.....AK......	motif5	1	TAQAK(1)DEQHELKPQAEK	FALSE	TAQAK(67.41)DEQHELK(-67.41)PQAEK(-92.15)	3	-0.36621	67.4126	8.77703e-13	132.64	109.79	132.64											1	67.4126	8.77703e-13	132.64	80753000
PF3D7_0935900	202	202	PF3D7_0935900	ring-exported protein 1	>PF3D7_0935900 organism=Plasmodium_falciparum_3D7 product=ring-exported protein 1 (REX1) location=Pf3D7_09_v3:1420483-1422807(-) length=713 sequence_SO=chromosome SO=protein_coding	1	K	EEKEKEAKKKAEEFEKRKQLHEEEKRKARET	8	.A....K......	motif11	1	KKAEEFEK(1)R	FALSE	K(-159.02)K(-150.01)AEEFEK(150.01)R	2	-1.2541	150.01	0.00236616	161.17	108.68	161.17											1	150.01	0.00236616	161.17	132470000
PF3D7_0935900	195	195	PF3D7_0935900	ring-exported protein 1	>PF3D7_0935900 organism=Plasmodium_falciparum_3D7 product=ring-exported protein 1 (REX1) location=Pf3D7_09_v3:1420483-1422807(-) length=713 sequence_SO=chromosome SO=protein_coding	1	K	PEQGQKDEEKEKEAKKKAEEFEKRKQLHEEE	1	......K.A....	motif1	0.99852	K(0.999)K(0.001)AEEFEK	FALSE	K(28.29)K(-28.29)AEEFEK(-132.47)	2	0.11771	28.2896	8.82256e-05	157.99	60.563	137.95											0.99852	28.2896	8.82256e-05	157.99	118480000
PF3D7_0935900	250	250	PF3D7_0935900	ring-exported protein 1	>PF3D7_0935900 organism=Plasmodium_falciparum_3D7 product=ring-exported protein 1 (REX1) location=Pf3D7_09_v3:1420483-1422807(-) length=713 sequence_SO=chromosome SO=protein_coding	1	K	QEKKKVEHQKLIHKIKTQGDVDPAVQKVLNK	2	......K.Q....	motif7	1	IK(1)TQGDVDPAVQK	FALSE	IK(129.3)TQGDVDPAVQK(-129.3)	2	-0.042496	129.297	0.000109789	130.2	86.519	130.2											1	129.297	0.000109789	130.2	129980000
PF3D7_0935900	694	694	PF3D7_0935900	ring-exported protein 1	>PF3D7_0935900 organism=Plasmodium_falciparum_3D7 product=ring-exported protein 1 (REX1) location=Pf3D7_09_v3:1420483-1422807(-) length=713 sequence_SO=chromosome SO=protein_coding	1	K	NKEVKPQNEKYTYNQKVKAENTESEKSLLES	6	......K..A...	motif6	0.994704	YTYNQK(0.995)VK(0.005)	FALSE	YTYNQK(22.74)VK(-22.74)	2	0.3292	22.7374	0.00518941	139.28	77.317	139.28											0.994704	22.7374	0.00518941	139.28	27984000
PF3D7_0935900	211	211	PF3D7_0935900	ring-exported protein 1	>PF3D7_0935900 organism=Plasmodium_falciparum_3D7 product=ring-exported protein 1 (REX1) location=Pf3D7_09_v3:1420483-1422807(-) length=713 sequence_SO=chromosome SO=protein_coding	1	K	KAEEFEKRKQLHEEEKRKARETQQALHKKLQ	7	......K..A...	motif6	1	QLHEEEK(1)R	FALSE	QLHEEEK(115.49)R	2	0.16838	115.494	0.00585355	123.72	36.927	115.49											1	115.494	0.00585355	123.72	37452000
PF3D7_0935900	389	389	PF3D7_0935900	ring-exported protein 1	>PF3D7_0935900 organism=Plasmodium_falciparum_3D7 product=ring-exported protein 1 (REX1) location=Pf3D7_09_v3:1420483-1422807(-) length=713 sequence_SO=chromosome SO=protein_coding	1	K	AEKDASKLTTTYDQTKEVKPQAEKDASKLTT	9	......K.....A	motif2	0.937021	LTTTYDQTK(0.937)EVK(0.063)PQAEK	FALSE	LTTTYDQTK(11.74)EVK(-11.74)PQAEK(-37.56)	3	0.16355	11.7369	4.17405e-08	102.08	77.167	102.08											0.937021	11.7369	4.17405e-08	102.08	23751000
PF3D7_0935900	696	696	PF3D7_0935900	ring-exported protein 1	>PF3D7_0935900 organism=Plasmodium_falciparum_3D7 product=ring-exported protein 1 (REX1) location=Pf3D7_09_v3:1420483-1422807(-) length=713 sequence_SO=chromosome SO=protein_coding	1	K	EVKPQNEKYTYNQKVKAENTESEKSLLESSV	2	......KA.....	motif3	1	VK(1)AENTESEK	FALSE	VK(110.75)AENTESEK(-110.75)	2	-0.031751	110.746	0.00125161	126.71	82.166	126.71											1	110.746	0.00125161	126.71	51518000
PF3D7_0935900	397	397	PF3D7_0935900	ring-exported protein 1	>PF3D7_0935900 organism=Plasmodium_falciparum_3D7 product=ring-exported protein 1 (REX1) location=Pf3D7_09_v3:1420483-1422807(-) length=713 sequence_SO=chromosome SO=protein_coding	1	K	TTTYDQTKEVKPQAEKDASKLTTTYDQTKEV	8	......K.A....	motif1	0.999549	EVKPQAEK(1)DASK	FALSE	EVK(-41.4)PQAEK(34.22)DASK(-34.22)	2	0.14649	34.2199	0.000373319	74.987	52.981	74.987											0.999549	34.2199	0.000373319	74.987	75080000
PF3D7_0935900	204	204	PF3D7_0935900	ring-exported protein 1	>PF3D7_0935900 organism=Plasmodium_falciparum_3D7 product=ring-exported protein 1 (REX1) location=Pf3D7_09_v3:1420483-1422807(-) length=713 sequence_SO=chromosome SO=protein_coding	1	K	KEKEAKKKAEEFEKRKQLHEEEKRKARETQQ	1			1	K(1)QLHEEEK	FALSE	K(159.39)QLHEEEK(-159.39)	2	0.0067729	159.389	0.00511293	173.39	57.898	173.39											1	159.389	0.00511293	173.39	16021000
PF3D7_0935900	271	271	PF3D7_0935900	ring-exported protein 1	>PF3D7_0935900 organism=Plasmodium_falciparum_3D7 product=ring-exported protein 1 (REX1) location=Pf3D7_09_v3:1420483-1422807(-) length=713 sequence_SO=chromosome SO=protein_coding	1	K	DPAVQKVLNKYNQKEKDEEQQILKIRDLQVQ	2			1	EK(1)DEEQQILK	FALSE	EK(92.94)DEEQQILK(-92.94)	2	0.34082	92.939	0.00375267	94.692	58.784	94.692											1	92.939	0.00375267	94.692	17843000
PF3D7_0935900	244	244	PF3D7_0935900	ring-exported protein 1	>PF3D7_0935900 organism=Plasmodium_falciparum_3D7 product=ring-exported protein 1 (REX1) location=Pf3D7_09_v3:1420483-1422807(-) length=713 sequence_SO=chromosome SO=protein_coding	1	K	LQRLKEQEKKKVEHQKLIHKIKTQGDVDPAV	6			0.999995	KVEHQK(1)LIHK	FALSE	K(-67.21)VEHQK(53.29)LIHK(-53.29)	3	-0.058505	53.2926	0.000931547	94.692	47.39	94.692											0.999995	53.2926	0.000931547	94.692	15838000
PF3D7_0935900	306	306	PF3D7_0935900	ring-exported protein 1	>PF3D7_0935900 organism=Plasmodium_falciparum_3D7 product=ring-exported protein 1 (REX1) location=Pf3D7_09_v3:1420483-1422807(-) length=713 sequence_SO=chromosome SO=protein_coding	1	K	QQRIQSLKSTNNGQPKTKDEYLQLKDLQKEY	8			0.995093	STNNGQPK(0.995)TK(0.005)DEYLQLK	FALSE	STNNGQPK(23.14)TK(-23.14)DEYLQLK(-78.06)	3	1.2959	23.1414	1.48307e-07	108.63	96.142	108.63											0.995093	23.1414	1.48307e-07	108.63
PF3D7_0935900	185	185	PF3D7_0935900	ring-exported protein 1	>PF3D7_0935900 organism=Plasmodium_falciparum_3D7 product=ring-exported protein 1 (REX1) location=Pf3D7_09_v3:1420483-1422807(-) length=713 sequence_SO=chromosome SO=protein_coding	1	K	KSNIENNKDFPEQGQKDEEKEKEAKKKAEEF	15			0.856625	SNIENNK(0.001)DFPEQGQK(0.857)DEEK(0.132)EK(0.01)	FALSE	SNIENNK(-29.07)DFPEQGQK(8.12)DEEK(-8.12)EK(-19.24)	4	-0.034369	8.1186	9.86274e-09	68.42	62.194	49.528											0.856625	8.1186	9.86274e-09	68.42	23906000
PF3D7_0935900	196	196	PF3D7_0935900	ring-exported protein 1	>PF3D7_0935900 organism=Plasmodium_falciparum_3D7 product=ring-exported protein 1 (REX1) location=Pf3D7_09_v3:1420483-1422807(-) length=713 sequence_SO=chromosome SO=protein_coding	1	K	EQGQKDEEKEKEAKKKAEEFEKRKQLHEEEK	2	......KA.....	motif3	0.987447	K(0.013)K(0.987)AEEFEK	FALSE	K(-18.96)K(18.96)AEEFEK(-142.7)	2	-1.0475	18.9577	0.00993027	159.79	38.701	159.79						0.835289	7.05113	0.00993027	94.309		0.987447	18.9577	0.0215826	159.79	184150000
PF3D7_0935900	224	224	PF3D7_0935900	ring-exported protein 1	>PF3D7_0935900 organism=Plasmodium_falciparum_3D7 product=ring-exported protein 1 (REX1) location=Pf3D7_09_v3:1420483-1422807(-) length=713 sequence_SO=chromosome SO=protein_coding	1	K	EEKRKARETQQALHKKLQEQLQRLKEQEKKK	1	......K.Q....	motif7	1	K(1)LQEQLQR	FALSE	K(80.44)LQEQLQR	2	-0.12524	80.4381	0.00397848	176.6	76.587	80.438						1	80.4381	0.00804875	116.73	11336000	1	170.24	0.00397848	176.6	87887000
PF3D7_0935900	265	265	PF3D7_0935900	ring-exported protein 1	>PF3D7_0935900 organism=Plasmodium_falciparum_3D7 product=ring-exported protein 1 (REX1) location=Pf3D7_09_v3:1420483-1422807(-) length=713 sequence_SO=chromosome SO=protein_coding	1	K	KTQGDVDPAVQKVLNKYNQKEKDEEQQILKI	4			1	VLNK(1)YNQK	FALSE	VLNK(72.85)YNQK(-72.85)	2	-0.22809	72.8505	0.00586812	173.59	82.524	173.59						0.999999	60.5632	0.00586812	145.04	36199000	1	72.8505	0.00536973	173.59	265740000
PF3D7_0935900	298	298	PF3D7_0935900	ring-exported protein 1	>PF3D7_0935900 organism=Plasmodium_falciparum_3D7 product=ring-exported protein 1 (REX1) location=Pf3D7_09_v3:1420483-1422807(-) length=713 sequence_SO=chromosome SO=protein_coding	1	K	LQVQLRHIQQRIQSLKSTNNGQPKTKDEYLQ	5			1	IQSLK(1)STNNGQPK	FALSE	IQSLK(68.31)STNNGQPK(-68.31)	3	1.7477	68.3135	5.13645e-06	159.5	89.407	116.03						0.999997	54.7446	0.000133155	118.87	26291000	1	68.3135	5.13645e-06	159.5	519670000
PF3D7_0935900	279	279	PF3D7_0935900	ring-exported protein 1	>PF3D7_0935900 organism=Plasmodium_falciparum_3D7 product=ring-exported protein 1 (REX1) location=Pf3D7_09_v3:1420483-1422807(-) length=713 sequence_SO=chromosome SO=protein_coding	1	K	NKYNQKEKDEEQQILKIRDLQVQLRHIQQRI	10			1	EKDEEQQILK(1)IR	FALSE	EK(-88.24)DEEQQILK(88.24)IR	3	-0.30332	88.2446	4.09931e-107	309.68	249.76	91.961						1	88.2446	9.77E-05	128.88	104940000	1	104.771	4.09931e-107	309.68	1369500000
PF3D7_0935900	315	315	PF3D7_0935900	ring-exported protein 1	>PF3D7_0935900 organism=Plasmodium_falciparum_3D7 product=ring-exported protein 1 (REX1) location=Pf3D7_09_v3:1420483-1422807(-) length=713 sequence_SO=chromosome SO=protein_coding	1	K	TNNGQPKTKDEYLQLKDLQKEYYDKEQDEQN	9			0.999999	TKDEYLQLK(1)DLQK	FALSE	TK(-121.02)DEYLQLK(58.27)DLQK(-58.27)	3	-0.074078	58.2721	1.4679e-05	147.73	98.249	147.73						0.99966	35.5009	0.000434204	72.321	20631000	0.999999	58.2721	1.4679e-05	147.73	200620000
PF3D7_0935900	261	261	PF3D7_0935900	ring-exported protein 1	>PF3D7_0935900 organism=Plasmodium_falciparum_3D7 product=ring-exported protein 1 (REX1) location=Pf3D7_09_v3:1420483-1422807(-) length=713 sequence_SO=chromosome SO=protein_coding	1	K	IHKIKTQGDVDPAVQKVLNKYNQKEKDEEQQ	13			0.999774	IKTQGDVDPAVQK(1)VLNK	FALSE	IK(-110.56)TQGDVDPAVQK(36.46)VLNK(-36.46)	3	0.24659	36.4615	1.29051e-49	229.9	178.76	126.91						0.998834	29.3277	1.54E-07	109.95	34912000	0.999774	36.4615	1.29051e-49	229.9	236860000
PF3D7_0935900	223	223	PF3D7_0935900	ring-exported protein 1	>PF3D7_0935900 organism=Plasmodium_falciparum_3D7 product=ring-exported protein 1 (REX1) location=Pf3D7_09_v3:1420483-1422807(-) length=713 sequence_SO=chromosome SO=protein_coding	1	K	EEEKRKARETQQALHKKLQEQLQRLKEQEKK	8			0.990667	ETQQALHK(0.991)K(0.009)	FALSE	ETQQALHK(20.26)K(-20.26)	2	0.091017	20.2589	0.00278153	115.06	79.233	102.55						0.961434	13.9672	0.00294889	111.61	31166000	0.990667	20.2589	0.00278153	115.06	310480000
PF3D7_0935900	308	308	PF3D7_0935900	ring-exported protein 1	>PF3D7_0935900 organism=Plasmodium_falciparum_3D7 product=ring-exported protein 1 (REX1) location=Pf3D7_09_v3:1420483-1422807(-) length=713 sequence_SO=chromosome SO=protein_coding	1	K	RIQSLKSTNNGQPKTKDEYLQLKDLQKEYYD	2			1	TK(1)DEYLQLK	FALSE	TK(92.65)DEYLQLK(-92.65)	2	-0.03664	92.648	0.0105602	94.692	48.23	94.692						1	92.648	0.0105602	94.692	13481000
PF3D7_0936800	224	224	PF3D7_0936800	Plasmodium exported protein (PHISTc), unknown function	>PF3D7_0936800 organism=Plasmodium_falciparum_3D7 product=Plasmodium exported protein (PHISTc), unknown function location=Pf3D7_09_v3:1458392-1459862(+) length=383 sequence_SO=chromosome SO=protein_coding	1	K	EWIEFRKSMFDVWKEKLASEFREHGEMLNQK	2	......K.A....	motif1	1	EK(1)LASEFR	FALSE	EK(104.06)LASEFR	2	-1.1264	104.057	0.00332044	104.06	52.27	104.06											1	104.057	0.00332044	104.06	44636000
PF3D7_0936800	307	307	PF3D7_0936800	Plasmodium exported protein (PHISTc), unknown function	>PF3D7_0936800 organism=Plasmodium_falciparum_3D7 product=Plasmodium exported protein (PHISTc), unknown function location=Pf3D7_09_v3:1458392-1459862(+) length=383 sequence_SO=chromosome SO=protein_coding	1	K	NVEKPKLQQHKVQPPKVQQQKVQPPKSQQQK	5	......K.Q....	motif7	1	VQPPK(1)VQQQK	FALSE	VQPPK(72.69)VQQQK(-72.69)	2	-0.018733	72.6865	0.000203069	105.1	55.061	105.1											1	72.6865	0.000203069	105.1	98874000
PF3D7_0936800	373	373	PF3D7_0936800	Plasmodium exported protein (PHISTc), unknown function	>PF3D7_0936800 organism=Plasmodium_falciparum_3D7 product=Plasmodium exported protein (PHISTc), unknown function location=Pf3D7_09_v3:1458392-1459862(+) length=383 sequence_SO=chromosome SO=protein_coding	1	K	GQKQVSPKAKGNNQAKPTKGNKLKKN_____	6	.....AK......	motif5	0.999998	GNNQAK(1)PTK	FALSE	GNNQAK(56.57)PTK(-56.57)	2	-0.44864	56.5714	0.00939443	97.565	65.805	97.565											0.999998	56.5714	0.00939443	97.565	13458000
PF3D7_0936800	176	176	PF3D7_0936800	Plasmodium exported protein (PHISTc), unknown function	>PF3D7_0936800 organism=Plasmodium_falciparum_3D7 product=Plasmodium exported protein (PHISTc), unknown function location=Pf3D7_09_v3:1458392-1459862(+) length=383 sequence_SO=chromosome SO=protein_coding	1	K	RKFKFAHFEMQGYALKQEKFLLEYAFLSLNG	12	....A.K......	motif10	0.989868	FAHFEMQGYALK(0.99)QEK(0.01)	FALSE	FAHFEMQGYALK(19.9)QEK(-19.9)	3	-0.63443	19.8989	5.17315e-05	66.387	56.737	45.722											0.989868	19.8989	5.17315e-05	66.387	11490000
PF3D7_0936800	376	376	PF3D7_0936800	Plasmodium exported protein (PHISTc), unknown function	>PF3D7_0936800 organism=Plasmodium_falciparum_3D7 product=Plasmodium exported protein (PHISTc), unknown function location=Pf3D7_09_v3:1458392-1459862(+) length=383 sequence_SO=chromosome SO=protein_coding	1	K	QVSPKAKGNNQAKPTKGNKLKKN________	9	..A...K......	motif11	0.999777	GNNQAKPTK(1)GNK	FALSE	GNNQAK(-36.59)PTK(36.59)GNK(-54.95)	2	-0.33583	36.5879	2.10565e-14	189.24	161.81	175.48											0.999777	36.5879	2.10565e-14	189.24	22311000
PF3D7_0936800	357	357	PF3D7_0936800	Plasmodium exported protein (PHISTc), unknown function	>PF3D7_0936800 organism=Plasmodium_falciparum_3D7 product=Plasmodium exported protein (PHISTc), unknown function location=Pf3D7_09_v3:1458392-1459862(+) length=383 sequence_SO=chromosome SO=protein_coding	1	K	KVQPPKVQKPKLQNQKGQKQVSPKAKGNNQA	5	......K.Q....	motif7	1	LQNQK(1)GQK	FALSE	LQNQK(79.09)GQK(-79.09)	2	-0.037646	79.0885	0.00524273	152.41	81.722	152.41											1	79.0885	0.00524273	152.41	127600000
PF3D7_0936800	302	302	PF3D7_0936800	Plasmodium exported protein (PHISTc), unknown function	>PF3D7_0936800 organism=Plasmodium_falciparum_3D7 product=Plasmodium exported protein (PHISTc), unknown function location=Pf3D7_09_v3:1458392-1459862(+) length=383 sequence_SO=chromosome SO=protein_coding	1	K	NVNEDNVEKPKLQQHKVQPPKVQQQKVQPPK	5	......K.Q....	motif7	1	LQQHK(1)VQPPK	FALSE	LQQHK(79.26)VQPPK(-79.26)	2	-0.072294	79.2561	0.00135706	125.71	95.12	125.71											1	79.2561	0.00135706	125.71	6478700
PF3D7_0936800	322	322	PF3D7_0936800	Plasmodium exported protein (PHISTc), unknown function	>PF3D7_0936800 organism=Plasmodium_falciparum_3D7 product=Plasmodium exported protein (PHISTc), unknown function location=Pf3D7_09_v3:1458392-1459862(+) length=383 sequence_SO=chromosome SO=protein_coding	1	K	KVQQQKVQPPKSQQQKVQPPKSQQQKVQPPK	5	......K.Q....	motif7	1	SQQQK(1)VQPPK	FALSE	SQQQK(88.52)VQPPK(-88.52)	2	0.10491	88.5219	0.000308262	154.84	115.8	131.82											1	88.5219	0.000308262	154.84	122980000
PF3D7_0936800	312	312	PF3D7_0936800	Plasmodium exported protein (PHISTc), unknown function	>PF3D7_0936800 organism=Plasmodium_falciparum_3D7 product=Plasmodium exported protein (PHISTc), unknown function location=Pf3D7_09_v3:1458392-1459862(+) length=383 sequence_SO=chromosome SO=protein_coding	1	K	KLQQHKVQPPKVQQQKVQPPKSQQQKVQPPK	5	......K.Q....	motif7	1	VQQQK(1)VQPPK	FALSE	VQQQK(98.77)VQPPK(-98.77)	2	-0.098617	98.769	8.22644e-07	171.56	45.497	144.77											1	98.769	8.22644e-07	171.56	135850000
PF3D7_0936800	317	317	PF3D7_0936800	Plasmodium exported protein (PHISTc), unknown function	>PF3D7_0936800 organism=Plasmodium_falciparum_3D7 product=Plasmodium exported protein (PHISTc), unknown function location=Pf3D7_09_v3:1458392-1459862(+) length=383 sequence_SO=chromosome SO=protein_coding	1	K	KVQPPKVQQQKVQPPKSQQQKVQPPKSQQQK	5	......K.Q....	motif7	1	VQPPK(1)SQQQK	FALSE	VQPPK(68.53)SQQQK(-68.53)	2	0.17411	68.5255	0.00165024	112.3	61.491	112.3											1	68.5255	0.00165024	112.3	216620000
PF3D7_0936800	360	360	PF3D7_0936800	Plasmodium exported protein (PHISTc), unknown function	>PF3D7_0936800 organism=Plasmodium_falciparum_3D7 product=Plasmodium exported protein (PHISTc), unknown function location=Pf3D7_09_v3:1458392-1459862(+) length=383 sequence_SO=chromosome SO=protein_coding	1	K	PPKVQKPKLQNQKGQKQVSPKAKGNNQAKPT	3	......K.....A	motif2	1	GQK(1)QVSPK	FALSE	GQK(107.39)QVSPK(-107.39)	2	-0.026693	107.395	0.00889037	153.08	57.334	153.08											1	107.395	0.00889037	153.08	161290000
PF3D7_0936800	367	367	PF3D7_0936800	Plasmodium exported protein (PHISTc), unknown function	>PF3D7_0936800 organism=Plasmodium_falciparum_3D7 product=Plasmodium exported protein (PHISTc), unknown function location=Pf3D7_09_v3:1458392-1459862(+) length=383 sequence_SO=chromosome SO=protein_coding	1	K	KLQNQKGQKQVSPKAKGNNQAKPTKGNKLKK	2	.....AK......	motif5	0.999993	AK(1)GNNQAKPTK	FALSE	AK(51.73)GNNQAK(-51.73)PTK(-84.5)	2	-0.25449	51.7346	0.000649706	103.46	79.372	103.46											0.999993	51.7346	0.000649706	103.46	99735000
PF3D7_0936800	79	79	PF3D7_0936800	Plasmodium exported protein (PHISTc), unknown function	>PF3D7_0936800 organism=Plasmodium_falciparum_3D7 product=Plasmodium exported protein (PHISTc), unknown function location=Pf3D7_09_v3:1458392-1459862(+) length=383 sequence_SO=chromosome SO=protein_coding	1	K	PEEHNNLRSHSTSDPKKNEEKSLSDEINKCD	8			0.804202	SHSTSDPK(0.804)K(0.187)NEEK(0.009)	FALSE	SHSTSDPK(6.34)K(-6.34)NEEK(-19.54)	3	1.283	6.3387	0.00627299	46.069	31.623	46.069											0.804202	6.3387	0.00627299	46.069	3756900
PF3D7_0936900	41	41	PF3D7_0936900	Plasmodium exported protein (PHISTb), unknown function, pseudogene	>PF3D7_0936900 organism=Plasmodium_falciparum_3D7 product=Plasmodium exported protein (PHISTb), unknown function, pseudogene location=Pf3D7_09_v3:1462400-1463659(+) length=363 sequence_SO=chromosome SO=protein_coding	1	K	CTIYSFDDEENNTKRKNQFASFSKLCLKLCI	1	......K.Q....	motif7	1	K(1)NQFASFSK	FALSE	K(79.54)NQFASFSK(-79.54)	2	0.64991	79.5372	0.00812012	88.495	27.736	88.495											1	79.5372	0.00812012	88.495	2739900
PF3D7_1001600	178	178	PF3D7_1001600	exported lipase 2	>PF3D7_1001600 organism=Plasmodium_falciparum_3D7 product=alpha/beta hydrolase, putative location=Pf3D7_10_v3:86538-89009(-) length=763 sequence_SO=chromosome SO=protein_coding	1	K	VNYDIIKRLIYDDSKKYYLNEKNKEEIRNAE	1			1	K(1)YYLNEK	FALSE	K(83.48)YYLNEK(-83.48)	2	-0.1845	83.4791	0.0310223	101.33	12.958	101.33						1	83.4791	0.0310223	101.33	2718800
PF3D7_1002100	310	310	PF3D7_1002100	EMP1-trafficking protein	>PF3D7_1002100 organism=Plasmodium_falciparum_3D7 product=EMP1-trafficking protein (PTP5) location=Pf3D7_10_v3:106653-108662(-) length=631 sequence_SO=chromosome SO=protein_coding	1	K	ETSSTKESNDSNGATKKPSKYTMNLDSPLLK	10	....A.K......	motif10	0.978827	ESNDSNGATK(0.979)K(0.02)PSK(0.001)	FALSE	ESNDSNGATK(16.82)K(-16.82)PSK(-30.87)	3	0.47548	16.8171	6.39083e-05	103.76	87.384	103.76											0.978827	16.8171	6.39083e-05	103.76	13763000
PF3D7_1002100	263	263	PF3D7_1002100	EMP1-trafficking protein	>PF3D7_1002100 organism=Plasmodium_falciparum_3D7 product=EMP1-trafficking protein (PTP5) location=Pf3D7_10_v3:106653-108662(-) length=631 sequence_SO=chromosome SO=protein_coding	1	K	DSPLLKGSSEGETSSKKAQEKSVEPTKKPSK	10	......K.A....	motif1	0.833904	GSSEGETSSK(0.834)K(0.166)	FALSE	GSSEGETSSK(7.01)K(-7.01)	2	0.19169	7.00757	0.00116326	110.08	87.391	63.944											0.833904	7.00757	0.00116326	110.08	16551000
PF3D7_1002100	346	346	PF3D7_1002100	EMP1-trafficking protein	>PF3D7_1002100 organism=Plasmodium_falciparum_3D7 product=EMP1-trafficking protein (PTP5) location=Pf3D7_10_v3:106653-108662(-) length=631 sequence_SO=chromosome SO=protein_coding	1	K	KTSSNKESNESNEPTKKPSKYTMNLDSPLLK	10			0.858263	ESNESNEPTK(0.858)K(0.1)PSK(0.042)	FALSE	ESNESNEPTK(9.34)K(-9.34)PSK(-13.13)	3	-0.41809	9.3365	3.01261e-05	94.09	80.989	94.09											0.858263	9.3365	3.01261e-05	94.09	35148000
PF3D7_1002100	274	274	PF3D7_1002100	EMP1-trafficking protein	>PF3D7_1002100 organism=Plasmodium_falciparum_3D7 product=EMP1-trafficking protein (PTP5) location=Pf3D7_10_v3:106653-108662(-) length=631 sequence_SO=chromosome SO=protein_coding	1	K	ETSSKKAQEKSVEPTKKPSKYTMNLDSPLLK	6			0.849359	SVEPTK(0.849)K(0.145)PSK(0.006)	FALSE	SVEPTK(7.69)K(-7.69)PSK(-21.52)	2	0.18252	7.6875	0.0046114	91.549	63.345	91.549											0.849359	7.6875	0.0046114	91.549	15902000
PF3D7_1002400.1;PF3D7_1002400.2		97	PF3D7_1002400.1	transformer-2 protein homolog beta, putative	>PF3D7_1002400.1 organism=Plasmodium_falciparum_3D7 product=RNA-binding protein, putative location=Pf3D7_10_v3:121115-123291(+) length=248 sequence_SO=chromosome SO=protein_coding;>PF3D7_1002400.2 organism=Plasmodium_falciparum_3D7 product=RNA-binding pro	1	K	NKMEIEGREINVEIAKRNEPHEPTPGEYKGV	8	.....AK......	motif5	1	EINVEIAK(1)R	FALSE	EINVEIAK(69.28)R	2	0.19441	69.2755	0.00795	89.047	48.323	69.275																1	69.2755	0.00795	89.047	2100400
PF3D7_1002700	397	397	PF3D7_1002700	conserved Plasmodium protein, unknown function	>PF3D7_1002700 organism=Plasmodium_falciparum_3D7 product=conserved Plasmodium protein, unknown function location=Pf3D7_10_v3:129276-132110(+) length=944 sequence_SO=chromosome SO=protein_coding	1	K	NLRKIISSEVVCLKSKIQSYDTQSIPINNKL	2	......K.Q....	motif7	1	SK(1)IQSYDTQSIPINNK	FALSE	SK(68.22)IQSYDTQSIPINNK(-68.22)	3	-0.043737	68.2151	4.59953e-06	71.354	58.629	71.354																1	68.2151	4.59953e-06	71.354	51150000
PF3D7_1002700	872	872	PF3D7_1002700	conserved Plasmodium protein, unknown function	>PF3D7_1002700 organism=Plasmodium_falciparum_3D7 product=conserved Plasmodium protein, unknown function location=Pf3D7_10_v3:129276-132110(+) length=944 sequence_SO=chromosome SO=protein_coding	1	K	KPDKQEIYQKTNPNEKHIKIMKYKKSYYKVI	6			0.999554	TNPNEK(1)HIK	FALSE	TNPNEK(33.51)HIK(-33.51)	2	-0.038257	33.5053	0.0243929	74.269	47.045	62.463																0.999554	33.5053	0.0243929	74.269	17677000
PF3D7_1002900	56	56	PF3D7_1002900	conserved Plasmodium protein, unknown function	>PF3D7_1002900 organism=Plasmodium_falciparum_3D7 product=conserved Plasmodium protein, unknown function location=Pf3D7_10_v3:138765-139853(+) length=127 sequence_SO=chromosome SO=protein_coding	1	K	DDESAIVQFKNGVEKKHIESLGSYKIKPLSY	1			0.999995	K(1)HIESLGSYK	FALSE	K(53.36)HIESLGSYK(-53.36)	3	-0.61471	53.3627	0.00452673	54.259	28.786	54.259																0.999995	53.3627	0.00452673	54.259	10650000
PF3D7_1003500	6	6	PF3D7_1003500	40S ribosomal protein S20e, putative	>PF3D7_1003500 organism=Plasmodium_falciparum_3D7 product=40S ribosomal protein S20e, putative location=Pf3D7_10_v3:160316-160962(-) length=118 sequence_SO=chromosome SO=protein_coding		K	__________MSKLMKGAIDNEKYRLRRIRI	5			1	SK(1)LMK(1)GAIDNEKYR	FALSE	SK(162.56)LMK(91.83)GAIDNEK(-91.83)YR	3	-0.50533	91.8253	5.82865e-19	182.33	78.104	180.11	1	69.041	0.000158763	90.697	15410000	1	79.502	2.12E-05	140.49	82146000	1	77.1272	6.13059e-10	170.79	108520000	1	91.8253	5.82865e-19	182.33	370380000
PF3D7_1003500	3	3	PF3D7_1003500	40S ribosomal protein S20e, putative	>PF3D7_1003500 organism=Plasmodium_falciparum_3D7 product=40S ribosomal protein S20e, putative location=Pf3D7_10_v3:160316-160962(-) length=118 sequence_SO=chromosome SO=protein_coding	2	K	_____________MSKLMKGAIDNEKYRLRR	2			1	SK(1)LMK(1)GAIDNEKYR	FALSE	SK(79.19)LMK(49.91)GAIDNEK(-49.91)YR	3	-1.3515	79.1934	5.82865e-19	182.33	78.104	92.939	0.999989	49.3905	0.000310149	56.768		1	79.1934	2.12E-05	92.939	49495000	1	114.848	6.13059e-10	170.79	93184000	1	96.6584	5.82865e-19	182.33	323580000
PF3D7_1003500	13	13	PF3D7_1003500	40S ribosomal protein S20e, putative	>PF3D7_1003500 organism=Plasmodium_falciparum_3D7 product=40S ribosomal protein S20e, putative location=Pf3D7_10_v3:160316-160962(-) length=118 sequence_SO=chromosome SO=protein_coding	1	K	___MSKLMKGAIDNEKYRLRRIRIALTSKNL	7	.A....K......	motif11	1	GAIDNEK(1)YR	FALSE	GAIDNEK(137.84)YR	2	0.23395	137.843	0.00192282	157.68	89.697	137.84	1	96.6681	0.00960518	96.668	11242000	1	137.843	0.00192282	157.68	54263000	1	63.8162	0.00196846	133.23	41946000	1	123.86	0.00307152	123.86	51057000
PF3D7_1003500	40	40	PF3D7_1003500	40S ribosomal protein S20e, putative	>PF3D7_1003500 organism=Plasmodium_falciparum_3D7 product=40S ribosomal protein S20e, putative location=Pf3D7_10_v3:160316-160962(-) length=118 sequence_SO=chromosome SO=protein_coding	1	K	SKNLRAIEKVCSDIMKGAKEKNLNVSGPVRL	7	......K.A....	motif1	0.890452	VCSDIMK(0.89)GAK(0.11)	FALSE	VCSDIMK(9.1)GAK(-9.1)	2	0.46097	9.10007	0.0285552	51.436	30.916	51.436											0.890452	9.10007	0.0285552	51.436
PF3D7_1003500	26	26	PF3D7_1003500	40S ribosomal protein S20e, putative	>PF3D7_1003500 organism=Plasmodium_falciparum_3D7 product=40S ribosomal protein S20e, putative location=Pf3D7_10_v3:160316-160962(-) length=118 sequence_SO=chromosome SO=protein_coding	1	K	NEKYRLRRIRIALTSKNLRAIEKVCSDIMKG	6	..A...K......	motif11	1	IALTSK(1)NLR	FALSE	IALTSK(43.44)NLR	3	0.29799	43.442	0.00483689	96.668	33.484	43.442						1	43.442	0.00960518	96.668	6196500						1	47.6028	0.00483689	57.59	9143500
PF3D7_1003600	173	173	PF3D7_1003600	inner membrane complex protein 1c, putative	>PF3D7_1003600 organism=Plasmodium_falciparum_3D7 product=inner membrane complex protein 1c, putative (IMC1c) location=Pf3D7_10_v3:164945-165790(+) length=281 sequence_SO=chromosome SO=protein_coding	1	K	KNIDWEDEYKKYTESKGLQRYSLDQNNIYQQ	5			1	YTESK(1)GLQR	FALSE	YTESK(63.22)GLQR	2	0.50927	63.2161	0.00428588	118.5	62.965	63.216											1	63.2161	0.0101689	95.502	6922600	1	40.5023	0.00428588	118.5	72429000
PF3D7_1003600	28	28	PF3D7_1003600	inner membrane complex protein 1c, putative	>PF3D7_1003600 organism=Plasmodium_falciparum_3D7 product=inner membrane complex protein 1c, putative (IMC1c) location=Pf3D7_10_v3:164945-165790(+) length=281 sequence_SO=chromosome SO=protein_coding	1	K	KLDNIDAKETSTVDRKWVALTAYQPVDVVTK	1	......K.....A	motif2	1	K(1)WVALTAYQPVDVVTK	FALSE	K(68.48)WVALTAYQPVDVVTK(-68.48)	3	0.42192	68.4805	6.71619e-06	68.481	61.818	68.481																1	68.4805	6.71619e-06	68.481	13187000
PF3D7_1003600	214	214	PF3D7_1003600	inner membrane complex protein 1c, putative	>PF3D7_1003600 organism=Plasmodium_falciparum_3D7 product=inner membrane complex protein 1c, putative (IMC1c) location=Pf3D7_10_v3:164945-165790(+) length=281 sequence_SO=chromosome SO=protein_coding	1	K	AYNQNAFNRSYELLNKQSSVKSQNNASGENF	7			0.999986	SYELLNK(1)QSSVK	FALSE	SYELLNK(48.47)QSSVK(-48.47)	2	-0.053433	48.4743	0.000774521	105.65	74.92	105.65																0.999986	48.4743	0.000774521	105.65	16901000
PF3D7_1003600	20	20	PF3D7_1003600	inner membrane complex protein 1c, putative	>PF3D7_1003600 organism=Plasmodium_falciparum_3D7 product=inner membrane complex protein 1c, putative (IMC1c) location=Pf3D7_10_v3:164945-165790(+) length=281 sequence_SO=chromosome SO=protein_coding	1	K	IKSSNSFQKLDNIDAKETSTVDRKWVALTAY	7	.....AK......	motif5	0.999996	LDNIDAK(1)ETSTVDRK	FALSE	LDNIDAK(53.8)ETSTVDRK(-53.8)	3	-0.30215	53.7951	1.99585e-05	93.424	67.442	93.424																0.999996	53.7951	1.99585e-05	93.424	5633600
PF3D7_1003600	158	158	PF3D7_1003600	inner membrane complex protein 1c, putative	>PF3D7_1003600 organism=Plasmodium_falciparum_3D7 product=inner membrane complex protein 1c, putative (IMC1c) location=Pf3D7_10_v3:164945-165790(+) length=281 sequence_SO=chromosome SO=protein_coding	1	K	IEDSEEIIKYVPRNSKNIDWEDEYKKYTESK	3			0.99999	NSK(1)NIDWEDEYKK	FALSE	NSK(52.04)NIDWEDEYK(-52.04)K(-53.94)	3	0.62917	52.0366	0.00147848	60.196	51.284	54.898																0.99999	52.0366	0.00225218	54.898	13752000
PF3D7_1003600	141	141	PF3D7_1003600	inner membrane complex protein 1c, putative	>PF3D7_1003600 organism=Plasmodium_falciparum_3D7 product=inner membrane complex protein 1c, putative (IMC1c) location=Pf3D7_10_v3:164945-165790(+) length=281 sequence_SO=chromosome SO=protein_coding	1	K	DKIVEVPQIKEVVRFKQIEDSEEIIKYVPRN	2			0.999964	FK(1)QIEDSEEIIK	FALSE	FK(44.38)QIEDSEEIIK(-44.38)	3	0.88795	44.3761	0.00351712	44.426	20.958	44.426																0.999964	44.3761	0.00351712	44.426	3350500
PF3D7_1004300	419	419	PF3D7_1004300	E3 ubiquitin-protein ligase, putative	>PF3D7_1004300 organism=Plasmodium_falciparum_3D7 product=E3 ubiquitin-protein ligase, putative location=Pf3D7_10_v3:199452-202844(-) length=1130 sequence_SO=chromosome SO=protein_coding	1	K	TCRFELPTDDQEYNCKREELRERLNSEMSRN	13			1	FELPTDDQEYNCK(1)REELR	FALSE	FELPTDDQEYNCK(45)REELR	4	-0.88518	44.9984	1.01773e-18	180.09	180.09	44.998						1	117.932	1.37E-12	117.93	28450000	1	47.6215	2.51352e-07	113.76	19381000	1	45.2798	1.01773e-18	180.09	117290000
PF3D7_1004300	346	346	PF3D7_1004300	E3 ubiquitin-protein ligase, putative	>PF3D7_1004300 organism=Plasmodium_falciparum_3D7 product=E3 ubiquitin-protein ligase, putative location=Pf3D7_10_v3:199452-202844(-) length=1130 sequence_SO=chromosome SO=protein_coding	1	K	RNGPPPASEEVIKNLKVETLTEERAKELESC	3			1	NLK(1)VETLTEER	FALSE	NLK(62.34)VETLTEER	2	-0.37456	62.3383	0.00176766	113.22	60.977	62.338						1	62.3383	0.00176766	99.5	16217000	1	83.1822	0.00541696	83.182		1	85.8127	0.00156977	91.961	8606400
PF3D7_1004300	369	369	PF3D7_1004300	E3 ubiquitin-protein ligase, putative	>PF3D7_1004300 organism=Plasmodium_falciparum_3D7 product=E3 ubiquitin-protein ligase, putative location=Pf3D7_10_v3:199452-202844(-) length=1130 sequence_SO=chromosome SO=protein_coding	1	K	RAKELESCAICREEYKENDEVHRITDNERCR	4			1	EEYK(1)ENDEVHR	FALSE	EEYK(54.26)ENDEVHR	3	-0.18939	54.2593	0.000701987	69.721	61.007	54.259																1	54.2593	0.000701987	69.721	14787000
PF3D7_1008400	100	100	PF3D7_1008400	26S protease regulatory subunit 4, putative	>PF3D7_1008400 organism=Plasmodium_falciparum_3D7 product=26S protease regulatory subunit 4, putative (RPT2) location=Pf3D7_10_v3:347206-348667(-) length=448 sequence_SO=chromosome SO=protein_coding	1	K	EEYITNQEQIKSSDDKNYVKLKIDDLRGSPV	5			0.999996	SSDDK(1)NYVK	FALSE	SSDDK(53.6)NYVK(-53.6)	2	0.85637	53.5966	0.0049917	111.46	52.105	111.46																0.999996	53.5966	0.0049917	111.46	8498900
PF3D7_1008700	252	252	PF3D7_1008700	tubulin beta chain	>PF3D7_1008700 organism=Plasmodium_falciparum_3D7 product=tubulin beta chain location=Pf3D7_10_v3:360625-362480(-) length=445 sequence_SO=chromosome SO=protein_coding	1	K	TCSLRFPGQLNSDLRKLAVNLIPFPRLHFFM	1	......K.A....	motif1	1	K(1)LAVNLIPFPR	FALSE	K(47.3)LAVNLIPFPR	3	-0.53823	47.3018	0.000269625	120.06	105.38	47.302											1	47.3018	0.00498433	47.302	3792500	1	47.8938	0.000269625	120.06	46551000
PF3D7_1008700	324	324	PF3D7_1008700	tubulin beta chain	>PF3D7_1008700 organism=Plasmodium_falciparum_3D7 product=tubulin beta chain location=Pf3D7_10_v3:360625-362480(-) length=445 sequence_SO=chromosome SO=protein_coding	1	K	RYLTACAMFRGRMSTKEVDEQMLNVQNKNSS	4			1	MSTK(1)EVDEQMLNVQNK	FALSE	MSTK(78.99)EVDEQMLNVQNK(-78.99)	3	-0.31596	78.9855	3.83733e-07	104.94	86.924	86.497																1	78.9855	3.83733e-07	104.94	31409000
PF3D7_1008700	359	359	PF3D7_1008700	tubulin beta chain	>PF3D7_1008700 organism=Plasmodium_falciparum_3D7 product=tubulin beta chain location=Pf3D7_10_v3:360625-362480(-) length=445 sequence_SO=chromosome SO=protein_coding	1	K	WIPHNTKSSVCDIPPKGLKMAVTFVGNSTAI	9			0.970317	SSVCDIPPK(0.97)GLK(0.03)	FALSE	SSVCDIPPK(15.14)GLK(-15.14)	2	-2.2299	15.1441	0.00462101	57.175	48.765	57.175																0.970317	15.1441	0.00462101	57.175
PF3D7_1010200	1547	1547	PF3D7_1010200	DNA2/NAM7 helicase, putative	>PF3D7_1010200 organism=Plasmodium_falciparum_3D7 product=DNA2/NAM7 helicase, putative location=Pf3D7_10_v3:405017-410536(-) length=1839 sequence_SO=chromosome SO=protein_coding	1	K	CDEWDKIIEHYKMNNKIIKIKRKKFYKKINN	4			0.889243	MNNK(0.889)IIK(0.11)IK(0.001)	FALSE	MNNK(9.08)IIK(-9.08)IK(-30.66)	2	0.12232	9.07652	0.0301127	95.909	24.997	95.909											0.889243	9.07652	0.0301127	95.909	9540700
PF3D7_1010300	103	103	PF3D7_1010300	succinate dehydrogenase subunit 4, putative	>PF3D7_1010300 organism=Plasmodium_falciparum_3D7 product=succinate dehydrogenase subunit 4, putative (SDH4) location=Pf3D7_10_v3:414732-415328(+) length=118 sequence_SO=chromosome SO=protein_coding	1	K	SINWIYIEYVKNKKKKSNSPLDVKVVGKKNK	1			1	K(1)SNSPLDVK	FALSE	K(79.2)SNSPLDVK(-79.2)	2	0.10895	79.2027	0.00154775	149.33	68.544	97.734											0.999999	58.6451	0.0166379	70.808	2051500	1	79.2027	0.00154775	149.33	44007000
PF3D7_1010300	28	28	PF3D7_1010300	succinate dehydrogenase subunit 4, putative	>PF3D7_1010300 organism=Plasmodium_falciparum_3D7 product=succinate dehydrogenase subunit 4, putative (SDH4) location=Pf3D7_10_v3:414732-415328(+) length=118 sequence_SO=chromosome SO=protein_coding	1	K	GFEVPGLYGFKNVVNKLLGTGVERYFKIVNI	5	......K..G...	motif9	1	NVVNK(1)LLGTGVER	FALSE	NVVNK(58.32)LLGTGVER	2	0.65774	58.32	0.00685105	58.32	41.108	58.32																1	58.32	0.00685105	58.32	1967000
PF3D7_1010300	12	12	PF3D7_1010300	succinate dehydrogenase subunit 4, putative	>PF3D7_1010300 organism=Plasmodium_falciparum_3D7 product=succinate dehydrogenase subunit 4, putative (SDH4) location=Pf3D7_10_v3:414732-415328(+) length=118 sequence_SO=chromosome SO=protein_coding	1	K	____MKLKLNLAKKKKGFEVPGLYGFKNVVN	1	..A...K......	motif11	1	K(1)GFEVPGLYGFK	FALSE	K(80.69)GFEVPGLYGFK(-80.69)	2	-0.58886	80.6901	0.000577315	80.69	64.924	80.69																1	80.6901	0.000577315	80.69	6315500
PF3D7_1010300	111	111	PF3D7_1010300	succinate dehydrogenase subunit 4, putative	>PF3D7_1010300 organism=Plasmodium_falciparum_3D7 product=succinate dehydrogenase subunit 4, putative (SDH4) location=Pf3D7_10_v3:414732-415328(+) length=118 sequence_SO=chromosome SO=protein_coding	1	K	YVKNKKKKSNSPLDVKVVGKKNK________	8	......K..G...	motif9	0.990119	SNSPLDVK(0.99)VVGK(0.01)	FALSE	SNSPLDVK(20.01)VVGK(-20.01)	2	-0.02259	20.0089	0.0184586	52.576	32.733	52.576																0.990119	20.0089	0.0184586	52.576	5679000
PF3D7_1011200.1	42	42	PF3D7_1011200.1	BET1-like protein, putative, unspecified product	>PF3D7_1011200.1 organism=Plasmodium_falciparum_3D7 product=conserved Plasmodium protein, unknown function location=Pf3D7_10_v3:436958-437708(+) length=114 sequence_SO=chromosome SO=protein_coding	1	K	NDNYILDLEKKVQSLKLIGSNLRDEVRTSNS	5	......K..G...	motif9	1	VQSLK(1)LIGSNLRDEVR	FALSE	VQSLK(42.32)LIGSNLRDEVR	3	0.5541	42.3169	0.00199923	42.317	30.116	42.317																1	42.3169	0.00199923	42.317	1734900
PF3D7_1011400	133	133	PF3D7_1011400	proteasome subunit beta type-5	>PF3D7_1011400 organism=Plasmodium_falciparum_3D7 product=proteasome subunit beta type-5 location=Pf3D7_10_v3:441140-441955(-) length=271 sequence_SO=chromosome SO=protein_coding	1	K	YLGKIIKIYELRNNEKISVRAASTILSNILY	4	......K.....A	motif2	1	NNEK(1)ISVR	FALSE	NNEK(85.68)ISVR	2	0.23836	85.6757	0.0306347	85.676	35.651	85.676																1	85.6757	0.0306347	85.676	10606000
PF3D7_1011400	99	99	PF3D7_1011400	proteasome subunit beta type-5	>PF3D7_1011400 organism=Plasmodium_falciparum_3D7 product=proteasome subunit beta type-5 location=Pf3D7_10_v3:441140-441955(-) length=271 sequence_SO=chromosome SO=protein_coding	1	K	SFISSQNVEKIIEINKNILGTMAGGAADCLY	6			0.999472	IIEINK(0.999)NILGTMAGGAADCLYWEK(0.001)	FALSE	IIEINK(32.77)NILGTMAGGAADCLYWEK(-32.77)	3	0.16473	32.7696	9.41305e-05	41.446	35.613	41.446																0.999472	32.7696	9.41305e-05	41.446	10579000
PF3D7_1011700	169	169	PF3D7_1011700	DNA repair protein RAD23, putative	>PF3D7_1011700 organism=Plasmodium_falciparum_3D7 product=DNA repair protein RAD23, putative location=Pf3D7_10_v3:449154-450323(+) length=389 sequence_SO=chromosome SO=protein_coding	1	K	IDNICAMGFEKEQVKKAMILAYNNPNRAIDY	1	......KA.....	motif3	1	K(1)AMILAYNNPNR	FALSE	K(74.61)AMILAYNNPNR	2	-0.045075	74.6109	1.00481e-05	152.07	136.92	74.611						1	74.6109	4.57E-05	137.89	6756200						1	60.2551	1.00481e-05	152.07	7391200
PF3D7_1011700	82	82	PF3D7_1011700	DNA repair protein RAD23, putative	>PF3D7_1011700 organism=Plasmodium_falciparum_3D7 product=DNA repair protein RAD23, putative location=Pf3D7_10_v3:449154-450323(+) length=389 sequence_SO=chromosome SO=protein_coding	1	K	VIVMVTRRIINKNNQKEDINKESLSKIENNN	4			0.999994	NNQK(1)EDINKESLSK	FALSE	NNQK(52.47)EDINK(-52.47)ESLSK(-83.36)	3	0.26323	52.469	2.97696e-05	135.71	69.441	94.09																0.999994	52.469	2.97696e-05	135.71	7607900
PF3D7_1011700	49	49	PF3D7_1011700	DNA repair protein RAD23, putative	>PF3D7_1011700 organism=Plasmodium_falciparum_3D7 product=DNA repair protein RAD23, putative location=Pf3D7_10_v3:449154-450323(+) length=389 sequence_SO=chromosome SO=protein_coding	1	K	LADMPSDKQKLIFSGKILKDEDKATDILKDN	6	.....GK......	motif4	0.999862	LIFSGK(1)ILKDEDK	FALSE	LIFSGK(38.62)ILK(-38.62)DEDK(-74.06)	3	0.48112	38.6155	1.8697e-07	107.65	66.404	107.65						0.760694	5.13848	0.0122679	40.941	4388400						0.999862	38.6155	1.8697e-07	107.65	22253000
PF3D7_1011700	87	87	PF3D7_1011700	DNA repair protein RAD23, putative	>PF3D7_1011700 organism=Plasmodium_falciparum_3D7 product=DNA repair protein RAD23, putative location=Pf3D7_10_v3:449154-450323(+) length=389 sequence_SO=chromosome SO=protein_coding	1	K	TRRIINKNNQKEDINKESLSKIENNNNNNNN	9			0.99999	NNQKEDINK(1)ESLSK	FALSE	NNQK(-50.08)EDINK(50.08)ESLSK(-64.22)	3	-0.21747	50.0763	2.9901e-07	130.2	80.111	115.12																0.99999	50.0763	2.9901e-07	130.2	22692000
PF3D7_1011700	151	151	PF3D7_1011700	DNA repair protein RAD23, putative	>PF3D7_1011700 organism=Plasmodium_falciparum_3D7 product=DNA repair protein RAD23, putative location=Pf3D7_10_v3:449154-450323(+) length=389 sequence_SO=chromosome SO=protein_coding	1	K	SFNNAESMLLTGDKLKESIDNICAMGFEKEQ	2			0.999991	LK(1)ESIDNICAMGFEK	FALSE	LK(50.37)ESIDNICAMGFEK(-50.37)	3	-0.25307	50.3704	0.000403399	51.03	44.344	51.03																0.999991	50.3704	0.000403399	51.03	4858700
PF3D7_1011700	78	78	PF3D7_1011700	DNA repair protein RAD23, putative	>PF3D7_1011700 organism=Plasmodium_falciparum_3D7 product=DNA repair protein RAD23, putative location=Pf3D7_10_v3:449154-450323(+) length=389 sequence_SO=chromosome SO=protein_coding	1	K	DNDTVIVMVTRRIINKNNQKEDINKESLSKI	4			0.99999	IINK(1)NNQK	FALSE	IINK(49.88)NNQK(-49.88)	2	0.32441	49.8773	0.00666292	146.94	61.639	146.94						0.99999	49.8773	0.00666292	146.94	48379000						0.997628	26.2378	0.0116311	120.65	9464600
PF3D7_1011800	34	34	PF3D7_1011800	PRE-binding protein	>PF3D7_1011800 organism=Plasmodium_falciparum_3D7 product=PRE-binding protein (PREBP) location=Pf3D7_10_v3:455398-458817(+) length=1139 sequence_SO=chromosome SO=protein_coding	1	K	NSGVVNNMKDALMNDKKQGGSKLNEKKGSKV	7	......K.Q....	motif7	0.880846	DALMNDK(0.881)K(0.119)	FALSE	DALMNDK(8.69)K(-8.69)	2	0.46453	8.68792	0.0285838	71.692	32.029	69.598																0.880846	8.68792	0.0285838	71.692	10492000
PF3D7_1011800	594	594	PF3D7_1011800	PRE-binding protein	>PF3D7_1011800 organism=Plasmodium_falciparum_3D7 product=PRE-binding protein (PREBP) location=Pf3D7_10_v3:455398-458817(+) length=1139 sequence_SO=chromosome SO=protein_coding	1	K	ELIEKATNNEKNLLNKNISKNIKLDSILARG	5			0.753642	NLLNK(0.754)NISK(0.246)	FALSE	NLLNK(4.86)NISK(-4.86)	2	-0.2987	4.85599	0.0321698	67.414	9.7056	67.414																0.753642	4.85599	0.0321698	67.414	3656900
PF3D7_1012400	56	56	PF3D7_1012400	hypoxanthine-guanine phosphoribosyltransferase	>PF3D7_1012400 organism=Plasmodium_falciparum_3D7 product=hypoxanthine-guanine phosphoribosyltransferase (HGPRT) location=Pf3D7_10_v3:475327-476563(-) length=231 sequence_SO=chromosome SO=protein_coding	1	K	TKVLVPNGVIKNRIEKLAYDIKKVYNNEEFH	3	......K.A....	motif1	1	IEK(1)LAYDIK	FALSE	IEK(78.02)LAYDIK(-78.02)	2	0.65871	78.0211	0.000490916	94.692	19.851	94.692						0.999972	45.5264	0.00146214	74.392	22243000						1	78.0211	0.000490916	94.692	60661000
PF3D7_1012600	341	341	PF3D7_1012600	GMP synthase [glutamine-hydrolyzing]	>PF3D7_1012600 organism=Plasmodium_falciparum_3D7 product=GMP synthetase (GMPS) location=Pf3D7_10_v3:482527-484194(-) length=555 sequence_SO=chromosome SO=protein_coding	1	K	LQGVTDPEQKRKIIGKLFIEEFEKAVNNIDI	4	.....GK......	motif4	0.998763	IIGK(0.999)LFIEEFEK(0.001)	FALSE	IIGK(29.07)LFIEEFEK(-29.07)	3	-1.4691	29.071	0.00530831	41.339	11.616	41.339																0.998763	29.071	0.00530831	41.339	11802000
PF3D7_1015900	440	440	PF3D7_1015900	enolase	>PF3D7_1015900 organism=Plasmodium_falciparum_3D7 product=enolase (ENO) location=Pf3D7_10_v3:637138-639011(+) length=446 sequence_SO=chromosome SO=protein_coding	1	K	RIEESLGNNAVFAGEKFRLQLN_________	15	A.....K......	motif8	1	IEESLGNNAVFAGEK(1)FR	FALSE	IEESLGNNAVFAGEK(45.38)FR	3	0.45099	45.3843	2.98854e-05	58.98	51.271	45.384																1	58.9802	2.98854e-05	58.98	7947900
PF3D7_1015900	278	278	PF3D7_1015900	enolase	>PF3D7_1015900 organism=Plasmodium_falciparum_3D7 product=enolase (ENO) location=Pf3D7_10_v3:637138-639011(+) length=446 sequence_SO=chromosome SO=protein_coding	1	K	ENKTYDLDFKTPNNDKSLVKTGAQLVDLYID	6			1	TPNNDK(1)SLVK	FALSE	TPNNDK(71.77)SLVK(-71.77)	2	0.14176	71.7703	0.00101192	143.22	102.49	128.97																1	71.7703	0.00101192	143.22	50293000
PF3D7_1015900	249	249	PF3D7_1015900	enolase	>PF3D7_1015900 organism=Plasmodium_falciparum_3D7 product=enolase (ENO) location=Pf3D7_10_v3:637138-639011(+) length=446 sequence_SO=chromosome SO=protein_coding	1	K	LLVTAIKSAGYEGKVKIAMDVAASEFYNSEN	2	......K.A....	motif1	1	VK(1)IAMDVAASEFYNSENK	FALSE	VK(77.72)IAMDVAASEFYNSENK(-77.72)	3	-0.88478	77.723	1.91564e-09	81.157	71.466	81.157																1	77.723	1.91564e-09	81.157	18348000
PF3D7_1015900;tr|F5H0C8|F5H0C8_HUMAN;sp|P13929-3|ENOB_HUMAN;sp|P09104-2|ENOG_HUMAN;sp|P13929-2|ENOB_HUMAN;sp|P13929|ENOB_HUMAN;sp|P09104|ENOG_HUMAN		407	PF3D7_1015900	enolase	>PF3D7_1015900 organism=Plasmodium_falciparum_3D7 product=enolase (ENO) location=Pf3D7_10_v3:637138-639011(+) length=446 sequence_SO=chromosome SO=protein_coding;>tr|F5H0C8|F5H0C8_HUMAN Gamma-enolase OS=Homo sapiens GN=ENO2 PE=1 SV=1;>sp|P13929-3|ENOB_HUM	1	K	VFIADLVVALRTGQIKTGAPCRSERNAKYNQ	5	......K..A...	motif6	1	TGQIK(1)TGAPCR	FALSE	TGQIK(98.16)TGAPCR	2	0.029407	98.1563	0.0003945	98.156	82.292	98.156						1	98.1563	0.000762865	98.156	49865000						1	58.8288	0.0003945	77.744	72597000
PF3D7_1016400	135	135	PF3D7_1016400	serine/threonine protein kinase, FIKK family	>PF3D7_1016400 organism=Plasmodium_falciparum_3D7 product=serine/threonine protein kinase, FIKK family (FIKK10.1) location=Pf3D7_10_v3:656709-659027(-) length=609 sequence_SO=chromosome SO=protein_coding	1	K	DDEEDTYKNEKTILSKINVKEKWNKYRPRTN	5			0.991895	TILSK(0.992)INVK(0.008)	FALSE	TILSK(20.88)INVK(-20.88)	2	0.36196	20.8769	0.0236965	74.92	20.763	59.153						0.967895	14.7926	0.0417022	63.216	4032700	0.984033	17.8977	0.0236965	74.92	9561000	0.991895	20.8769	0.0243578	59.153
PF3D7_1016400	337	337	PF3D7_1016400	serine/threonine protein kinase, FIKK family	>PF3D7_1016400 organism=Plasmodium_falciparum_3D7 product=serine/threonine protein kinase, FIKK family (FIKK10.1) location=Pf3D7_10_v3:656709-659027(-) length=609 sequence_SO=chromosome SO=protein_coding	1	K	PGITPKLYKILYEPEKKEYDIEQNTPDCMFH	7			0.930776	ILYEPEK(0.931)K(0.069)	FALSE	ILYEPEK(11.29)K(-11.29)	2	2.0344	11.2859	0.0270329	73.248	24.825	73.248											0.930776	11.2859	0.0270329	73.248	2931900
PF3D7_1017500	95	95	PF3D7_1017500	myosin essential light chain ELC	>PF3D7_1017500 organism=Plasmodium_falciparum_3D7 product=conserved Plasmodium protein, unknown function location=Pf3D7_10_v3:701746-702422(+) length=134 sequence_SO=chromosome SO=protein_coding	1	K	NTNVQIKIDNFLGIMKALDTRLTESDLNILL	9	......KA.....	motif3	1	IDNFLGIMK(1)ALDTR	FALSE	IDNFLGIMK(41.54)ALDTR	3	-0.36137	41.5417	0.00271181	41.542	31.391	41.542																1	41.5417	0.00271181	41.542	7358200
PF3D7_1017500	129	129	PF3D7_1017500	myosin essential light chain ELC	>PF3D7_1017500 organism=Plasmodium_falciparum_3D7 product=conserved Plasmodium protein, unknown function location=Pf3D7_10_v3:701746-702422(+) length=134 sequence_SO=chromosome SO=protein_coding	1	K	NPENKSTLNLKTVSQKLTESI__________	5			1	TVSQK(1)LTESI	FALSE	TVSQK(80.92)LTESI	2	1.0638	80.9162	0.00581261	88.948	45.641	80.916																1	80.9162	0.00581261	88.948	40917000
PF3D7_1017500	124	124	PF3D7_1017500	myosin essential light chain ELC	>PF3D7_1017500 organism=Plasmodium_falciparum_3D7 product=conserved Plasmodium protein, unknown function location=Pf3D7_10_v3:701746-702422(+) length=134 sequence_SO=chromosome SO=protein_coding	1	K	LLQITNPENKSTLNLKTVSQKLTESI_____	6			1	STLNLK(1)TVSQK	FALSE	STLNLK(81.38)TVSQK(-81.38)	2	0.35037	81.3814	1.95269e-09	179.19	147.72	179.19																1	81.3814	1.95269e-09	179.19	44726000
PF3D7_1017500	8	8	PF3D7_1017500	myosin essential light chain ELC	>PF3D7_1017500 organism=Plasmodium_falciparum_3D7 product=conserved Plasmodium protein, unknown function location=Pf3D7_10_v3:701746-702422(+) length=134 sequence_SO=chromosome SO=protein_coding	1	K	________MASDMEEKFREAFILFSSCSDHI	7	A.....K......	motif8	1	ASDMEEK(1)FR	FALSE	ASDMEEK(62.46)FR	2	-0.32487	62.4631	0.00209757	78.098	68.093	62.463																1	62.4631	0.00209757	78.098	12052000
PF3D7_1017500	62	62	PF3D7_1017500	myosin essential light chain ELC	>PF3D7_1017500 organism=Plasmodium_falciparum_3D7 product=conserved Plasmodium protein, unknown function location=Pf3D7_10_v3:701746-702422(+) length=134 sequence_SO=chromosome SO=protein_coding	1	K	LPNDINMDYWLNFAKKHYNYEQPFKHINNVN	1	....A.K......	motif10	1	K(1)HYNYEQPFK	FALSE	K(66.24)HYNYEQPFK(-66.24)	3	0.11287	66.2369	0.0015674	73.499	51.046	73.499																1	66.2369	0.0015674	73.499	6992300
PF3D7_1018300	1011	1011	PF3D7_1018300	peptidase, putative	>PF3D7_1018300 organism=Plasmodium_falciparum_3D7 product=conserved Plasmodium protein, unknown function location=Pf3D7_10_v3:729809-732856(-) length=1015 sequence_SO=chromosome SO=protein_coding	1	K	DIQSYYFYRKSVHVAKTSSR___________	6			1	SVHVAK(1)TSSR	FALSE	SVHVAK(49.47)TSSR	3	-0.31502	49.472	0.00582346	49.472	41.053	49.472																1	49.472	0.00582346	49.472	4897300
PF3D7_1019000	1649	1649	PF3D7_1019000	eukaryotic translation initiation factor subunit eIF2A, putative	>PF3D7_1019000 organism=Plasmodium_falciparum_3D7 product=eukaryotic translation initiation factor subunit eIF2A, putative location=Pf3D7_10_v3:757795-765158(+) length=2405 sequence_SO=chromosome SO=protein_coding	1	K	QFIIILKHHDNLYLQKREKLITDHYDKQNVV	9			1	HHDNLYLQK(1)R	FALSE	HHDNLYLQK(43.3)R	3	0.29399	43.2968	0.00984245	43.297	32.545	43.297																1	43.2968	0.00984245	43.297	7982100
PF3D7_1019400	25	25	PF3D7_1019400	60S ribosomal protein L30e, putative	>PF3D7_1019400 organism=Plasmodium_falciparum_3D7 product=60S ribosomal protein L30e, putative location=Pf3D7_10_v3:786503-787008(+) length=108 sequence_SO=chromosome SO=protein_coding	1	K	GDNINAKLQLVMKSGKYQFGRKSCLKALRTG	3	.....GK......	motif4	1	SGK(1)YQFGR	FALSE	SGK(85.16)YQFGR	2	1.3833	85.1608	0.0153219	110.12	85.601	85.161																1	85.1608	0.0153219	110.12	94909000
PF3D7_1019400	7	7	PF3D7_1019400	60S ribosomal protein L30e, putative	>PF3D7_1019400 organism=Plasmodium_falciparum_3D7 product=60S ribosomal protein L30e, putative location=Pf3D7_10_v3:786503-787008(+) length=108 sequence_SO=chromosome SO=protein_coding	1	K	_________MAKKSKKSAGDNINAKLQLVMK	1	......K.A....	motif1	1	K(1)SAGDNINAK	FALSE	K(107.94)SAGDNINAK(-107.94)	2	-0.49955	107.939	0.00083493	138.76	77.852	138.76						1	107.939	0.00083493	138.76	17686000						1	75.3337	0.00224467	94.465	9197100
PF3D7_1019900	23	23	PF3D7_1019900	autophagy-related protein 8	>PF3D7_1019900 organism=Plasmodium_falciparum_3D7 product=autophagy-related protein 8 (ATG8) location=Pf3D7_10_v3:808618-808992(-) length=124 sequence_SO=chromosome SO=protein_coding	1	K	VSFENRVAETHKIRSKYPNRIPVVCERANRS	2			1	SK(1)YPNRIPVVCER	FALSE	SK(45.21)YPNRIPVVCER	3	0.79379	45.2069	0.00190802	56.569	50.293	45.207																1	56.5691	0.00190802	56.569	22432000
PF3D7_1019900	19	19	PF3D7_1019900	autophagy-related protein 8	>PF3D7_1019900 organism=Plasmodium_falciparum_3D7 product=autophagy-related protein 8 (ATG8) location=Pf3D7_10_v3:808618-808992(-) length=124 sequence_SO=chromosome SO=protein_coding	1	K	LKDEVSFENRVAETHKIRSKYPNRIPVVCER	6	..A...K......	motif11	1	VAETHK(1)IR	FALSE	VAETHK(66.43)IR	3	-0.45841	66.4293	0.0026585	130.22	66.656	66.429																1	106.042	0.0026585	130.22	47061000
PF3D7_1019900	47	47	PF3D7_1019900	autophagy-related protein 8	>PF3D7_1019900 organism=Plasmodium_falciparum_3D7 product=autophagy-related protein 8 (ATG8) location=Pf3D7_10_v3:808618-808992(-) length=124 sequence_SO=chromosome SO=protein_coding	1	K	CERANRSNLPIIEKKKFLVPMNMLVGEFKFI	1			0.999677	K(1)FLVPMNMLVGEFK	FALSE	K(34.9)FLVPMNMLVGEFK(-34.9)	3	0.034105	34.9042	0.0042257	40.278	32.598	40.278																0.999677	34.9042	0.0042257	40.278	4463400
PF3D7_1020900	181	181	PF3D7_1020900	ADP-ribosylation factor	>PF3D7_1020900 organism=Plasmodium_falciparum_3D7 product=ADP-ribosylation factor (ARF1) location=Pf3D7_10_v3:845086-846192(-) length=181 sequence_SO=chromosome SO=protein_coding	1	K	LYEGFDWLTTHLNNAK_______________	19			1	GDGLYEGFDWLTTHLNNAK(1)	TRUE	GDGLYEGFDWLTTHLNNAK(57.53)	3	-0.54725	57.5251	2.60125e-10	95.197	85.057	57.525																1	57.5251	2.60125e-10	95.197	36385000
PF3D7_1020900	127	127	PF3D7_1020900	ADP-ribosylation factor	>PF3D7_1020900 organism=Plasmodium_falciparum_3D7 product=ADP-ribosylation factor (ARF1) location=Pf3D7_10_v3:845086-846192(-) length=181 sequence_SO=chromosome SO=protein_coding	1	K	NEEELKDAIILVFANKQDLPNAMSAAEVTEK	18	......K.....A	motif2	0.999756	MINEEELKDAIILVFANK(1)QDLPNAMSAAEVTEK	FALSE	MINEEELK(-36.52)DAIILVFANK(36.52)QDLPNAMSAAEVTEK(-46.69)	4	0.54727	36.5217	5.05714e-19	74.81	72.812	74.81																0.999756	36.5217	5.05714e-19	74.81	78350000
PF3D7_1020900	117	117	PF3D7_1020900	ADP-ribosylation factor	>PF3D7_1020900 organism=Plasmodium_falciparum_3D7 product=ADP-ribosylation factor (ARF1) location=Pf3D7_10_v3:845086-846192(-) length=181 sequence_SO=chromosome SO=protein_coding	1	K	DAREELHRMINEEELKDAIILVFANKQDLPN	8	......K.A....	motif1	0.999592	MINEEELK(1)DAIILVFANK	FALSE	MINEEELK(33.89)DAIILVFANK(-33.89)	3	-0.49827	33.8908	0.00114255	40.493	34.124	40.493																0.999592	33.8908	0.00114255	40.493	8285000
PF3D7_1020900;tr|F5H0C7|F5H0C7_HUMAN;sp|P84077|ARF1_HUMAN;sp|P61204|ARF3_HUMAN;tr|F5H423|F5H423_HUMAN		73	PF3D7_1020900	ADP-ribosylation factor	>PF3D7_1020900 organism=Plasmodium_falciparum_3D7 product=ADP-ribosylation factor (ARF1) location=Pf3D7_10_v3:845086-846192(-) length=181 sequence_SO=chromosome SO=protein_coding;>tr|F5H0C7|F5H0C7_HUMAN ADP-ribosylation factor 3 (Fragment) OS=Homo sapiens	1	K	FRNISFTVWDVGGQDKIRPLWRHYYSNTDGL	14			1	NISFTVWDVGGQDK(1)IRPLWR	FALSE	NISFTVWDVGGQDK(53.45)IRPLWR	3	0.35127	53.4532	3.83814e-05	53.453	35.558	53.453																1	53.4532	3.83814e-05	53.453	14246000
PF3D7_1022700	4	4	PF3D7_1022700	phospholipid scramblase, putative	>PF3D7_1022700 organism=Plasmodium_falciparum_3D7 product=phospholipid scramblase, putative location=Pf3D7_10_v3:951752-952579(-) length=275 sequence_SO=chromosome SO=protein_coding	1	K	____________MEEKNIHMQPNINYSYRNP	4			1	MEEK(1)NIHMQPNINYSYR	FALSE	MEEK(55.69)NIHMQPNINYSYR	3	0.73875	55.6879	5.19417e-05	57.525	57.525	55.688																1	57.5251	5.19417e-05	57.525	11701000
PF3D7_1023000	14	14	PF3D7_1023000	conserved Plasmodium membrane protein, unknown function	>PF3D7_1023000 organism=Plasmodium_falciparum_3D7 product=conserved Plasmodium membrane protein, unknown function location=Pf3D7_10_v3:961066-962307(-) length=413 sequence_SO=chromosome SO=protein_coding	1	K	__MKMEDVEIKQALFKNENKMKGEKCTICKS	5			0.997717	QALFK(0.998)NENK(0.002)	FALSE	QALFK(26.41)NENK(-26.41)	2	1.0489	26.406	0.00357434	121.64	69.903	99.013																0.997717	26.406	0.00357434	121.64	21230000
PF3D7_1023000	333	333	PF3D7_1023000	conserved Plasmodium membrane protein, unknown function	>PF3D7_1023000 organism=Plasmodium_falciparum_3D7 product=conserved Plasmodium membrane protein, unknown function location=Pf3D7_10_v3:961066-962307(-) length=413 sequence_SO=chromosome SO=protein_coding	1	K	FFCIKLYNNTIKNKNKNFHFYDNYPFINDVK	2			0.999942	NK(1)NFHFYDNYPFINDVK	FALSE	NK(42.39)NFHFYDNYPFINDVK(-42.39)	3	0.23807	42.3866	0.000266678	46.249	39.475	46.249																0.999942	42.3866	0.000266678	46.249	17172000
PF3D7_1023000	23	23	PF3D7_1023000	conserved Plasmodium membrane protein, unknown function	>PF3D7_1023000 organism=Plasmodium_falciparum_3D7 product=conserved Plasmodium membrane protein, unknown function location=Pf3D7_10_v3:961066-962307(-) length=413 sequence_SO=chromosome SO=protein_coding	1	K	IKQALFKNENKMKGEKCTICKSKYGKFINAF	5			0.958832	MK(0.041)GEK(0.959)CTICK	FALSE	MK(-13.72)GEK(13.72)CTICK(-33.22)	3	0.16027	13.7203	0.0113426	53.756	38.127	51.276																0.958832	13.7203	0.0113426	53.756	28788000
PF3D7_1023900	1730	1730	PF3D7_1023900	chromodomain-helicase-DNA-binding protein 1 homolog, putative	>PF3D7_1023900 organism=Plasmodium_falciparum_3D7 product=chromodomain-helicase-DNA-binding protein 1 homolog, putative (CHD1) location=Pf3D7_10_v3:997475-1007461(-) length=3328 sequence_SO=chromosome SO=protein_coding	1	K	NDLQAGARAHRIGQTKTVQIYRLVTKDSIEQ	5			1	IGQTK(1)TVQIYR	FALSE	IGQTK(53.57)TVQIYR	3	0.017851	53.5672	0.00240233	53.567	37.56	53.567																1	53.5672	0.00240233	53.567	8246800
PF3D7_1023900	1806	1806	PF3D7_1023900	chromodomain-helicase-DNA-binding protein 1 homolog, putative	>PF3D7_1023900 organism=Plasmodium_falciparum_3D7 product=chromodomain-helicase-DNA-binding protein 1 homolog, putative (CHD1) location=Pf3D7_10_v3:997475-1007461(-) length=3328 sequence_SO=chromosome SO=protein_coding	1	K	ELSKILKFGAQKLWEKNSSKYSPQKLDEDKN	4	A.....K......	motif8	0.99899	LWEK(0.999)NSSK(0.001)	FALSE	LWEK(29.95)NSSK(-29.95)	2	1.4508	29.9505	0.033251	81.296	20.135	81.296																0.99899	29.9505	0.033251	81.296	1755700
PF3D7_1024800	1438	1438	PF3D7_1024800	exported protein 3	>PF3D7_1024800 organism=Plasmodium_falciparum_3D7 product=conserved Plasmodium protein, unknown function location=Pf3D7_10_v3:1034685-1039079(+) length=1464 sequence_SO=chromosome SO=protein_coding		K	AIKVYASVMKKKIGDKHDVVLSFKDREEIPV	4			1	IGDK(1)HDVVLSFK	FALSE	IGDK(76.75)HDVVLSFK(-76.75)	3	-0.53996	76.7546	6.19438e-05	135.91	93.851	84.365	1	63.6441	0.000258634	69.92	20036000						1	76.7546	6.19438e-05	135.91	438700000	0.999999	62.2727	0.000204046	73.219	23139000
PF3D7_1024800	1434	1434	PF3D7_1024800	exported protein 3	>PF3D7_1024800 organism=Plasmodium_falciparum_3D7 product=conserved Plasmodium protein, unknown function location=Pf3D7_10_v3:1034685-1039079(+) length=1464 sequence_SO=chromosome SO=protein_coding		K	LVSIAIKVYASVMKKKIGDKHDVVLSFKDRE	1	A.....K......	motif8	1	K(1)IGDK(1)HDVVLSFK	FALSE	K(80.91)IGDK(60.37)HDVVLSFK(-60.37)	3	-0.52673	80.9131	0.000165313	83.087	57.283	80.96											1	80.9131	0.000165313	83.087	117150000
PF3D7_1025000	825	825	PF3D7_1025000	EF-hand calcium-binding domain-containing protein, putative	>PF3D7_1025000 organism=Plasmodium_falciparum_3D7 product=formin 2, putative location=Pf3D7_10_v3:1045608-1049760(-) length=980 sequence_SO=chromosome SO=protein_coding	1	K	QNYLNNITNKRLNIQKLKNQHILLFNSLSNQ	6			0.997464	RLNIQK(0.997)LK(0.003)	FALSE	RLNIQK(25.95)LK(-25.95)	3	0.60242	25.9483	0.0226542	57.177	8.6162	57.177																0.997464	25.9483	0.0226542	57.177	780160
PF3D7_1025900	678	678	PF3D7_1025900	conserved protein, unknown function	>PF3D7_1025900 organism=Plasmodium_falciparum_3D7 product=conserved Plasmodium protein, unknown function location=Pf3D7_10_v3:1091436-1097277(-) length=1331 sequence_SO=chromosome SO=protein_coding	1	K	HLYPYQNSNTNNQIKKIENFNVSKNYMNESS	1			1	K(1)IENFNVSK	FALSE	K(77.96)IENFNVSK(-77.96)	2	0.50601	77.9583	0.0096603	83.499	24.684	83.499																1	77.9583	0.0096603	83.499	4164500
PF3D7_1026600	437	437	PF3D7_1026600	conserved Plasmodium protein, unknown function	>PF3D7_1026600 organism=Plasmodium_falciparum_3D7 product=conserved Plasmodium protein, unknown function location=Pf3D7_10_v3:1113495-1118573(-) length=1692 sequence_SO=chromosome SO=protein_coding	1	K	KSHETNVLCGNKIYNKCGNKNIFLDHSVFLN	4			0.999932	IYNK(1)CGNK	FALSE	IYNK(41.7)CGNK(-41.7)	2	0.92353	41.7012	0.0248898	94.662	51.539	89.55																0.999932	41.7012	0.0248898	94.662	14514000
PF3D7_1026600	433	433	PF3D7_1026600	conserved Plasmodium protein, unknown function	>PF3D7_1026600 organism=Plasmodium_falciparum_3D7 product=conserved Plasmodium protein, unknown function location=Pf3D7_10_v3:1113495-1118573(-) length=1692 sequence_SO=chromosome SO=protein_coding	1	K	NETNKSHETNVLCGNKIYNKCGNKNIFLDHS	11			0.954281	SHETNVLCGNK(0.954)IYNK(0.046)	FALSE	SHETNVLCGNK(13.2)IYNK(-13.2)	3	-0.55816	13.1958	0.000613202	47.037	35.454	47.037																0.954281	13.1958	0.000613202	47.037	4749800
PF3D7_1027300	224	224	PF3D7_1027300	peroxiredoxin	>PF3D7_1027300 organism=Plasmodium_falciparum_3D7 product=peroxiredoxin (nPrx) location=Pf3D7_10_v3:1140589-1142602(-) length=393 sequence_SO=chromosome SO=protein_coding	1	K	DKEKPKKSSTSTQKKKGSVSSTISKKSVKKS	1			1	K(1)GSVSSTISK	FALSE	K(106.58)GSVSSTISK(-106.58)	2	0.10958	106.578	7.17389e-07	169.89	101.05	114.24	1	85.8573	0.00335554	89.266	11759000	1	106.578	0.000522029	149.49	35421000						1	152.725	7.17389e-07	169.89	237270000
[truncated: 652 more rows]
