# Supplementary material for: Ubiquitin activation is essential for schizont maturation in Plasmodium falciparum blood-stage development
Source: PLoS Pathog. 2020 Jun 22;16(6):e1008640. doi: 10.1371/journal.ppat.1008640 (PMC7332102; doi:10.1371/journal.ppat.1008640)
Supplement: S3 Dataset — (XLSX) [file ppat.1008640.s011.xlsx]

## Sheet: P. falciparum site distribution
Proteins identified as ubiquitylated			Number of ubiquitylation sites identified at each stage of development
Gene name	LEADING AcNR	Protein Name (PlasmoDB v.46)	All parasite stages	Rings	Trophozoites	Schizonts	Merozoites
PF3D7_0202000	PF3D7_0202000	knob-associated histidine-rich protein	25		6	25	3
PF3D7_0822900	PF3D7_0822900	conserved Plasmodium protein, unknown function	25				25
PF3D7_0935900	PF3D7_0935900	ring-exported protein 1	24		9	23
PF3D7_0818900	PF3D7_0818900	heat shock protein 70	23	4	7	9	22
PF3D7_0922200	PF3D7_0922200	S-adenosylmethionine synthetase	23	1	8	5	22
PF3D7_1357100;PF3D7_1357000	PF3D7_1357100	elongation factor 1-alpha	23		1	13	22
PF3D7_0708400	PF3D7_0708400	heat shock protein 90	20	4	17	5	13
PF3D7_1468700	PF3D7_1468700	eukaryotic initiation factor 4A	15			3	15
PF3D7_0936800	PF3D7_0936800	Plasmodium exported protein (PHISTc), unknown function	13			13
PF3D7_0501200	PF3D7_0501200	parasite-infected erythrocyte surface protein	12		5	12	5
PF3D7_1027300	PF3D7_1027300	peroxiredoxin	12	1	2		12
PF3D7_1224300	PF3D7_1224300	polyadenylate-binding protein 1, putative	12			1	12
PF3D7_0402000	PF3D7_0402000	Plasmodium exported protein (PHISTa), unknown function	11		7	8
PF3D7_0407800	PF3D7_0407800	conserved Plasmodium protein, unknown function	11				11
PF3D7_0618000	PF3D7_0618000	conserved Plasmodium membrane protein, unknown function	11			2	11
PF3D7_1246200	PF3D7_1246200	actin I	11			6	11
PF3D7_1251200	PF3D7_1251200	coronin	11				11
PF3D7_1220900	PF3D7_1220900	heterochromatin protein 1	10		4		10
PF3D7_0414900	PF3D7_0414900	armadillo-domain containing rhoptry protein	9				9
PF3D7_1409300	PF3D7_1409300	DNA damage-inducible protein 1, putative	9		4	1	9
PF3D7_1444800	PF3D7_1444800	fructose-bisphosphate aldolase	9				9
PF3D7_1455300	PF3D7_1455300	conserved protein, unknown function	9				9
PF3D7_0500800	PF3D7_0500800	mature parasite-infected erythrocyte surface antigen	8		2	8
PF3D7_0523000	PF3D7_0523000	multidrug resistance protein 1	8	1	1	6	3
PF3D7_0525800	PF3D7_0525800	inner membrane complex protein 1g, putative	8				8
PF3D7_1351700	PF3D7_1351700	inner membrane complex protein 1f, putative	8				8
PF3D7_1352500	PF3D7_1352500	thioredoxin-related protein, putative	8		2		8
PF3D7_1401200	PF3D7_1401200	Plasmodium exported protein, unknown function	8		7	7
PF3D7_0102200	PF3D7_0102200	ring-infected erythrocyte surface antigen	7	4		6	1
PF3D7_0219400.1	PF3D7_0219400.1	ribosome associated membrane protein RAMP4, putative, unspecified product	7				7
PF3D7_0608800	PF3D7_0608800	ornithine aminotransferase	7		1	1	7
PF3D7_0613900	PF3D7_0613900	myosin E, putative	7				7
PF3D7_0817900	PF3D7_0817900	high mobility group protein B2	7		2		7
PF3D7_0831400	PF3D7_0831400	Plasmodium exported protein, unknown function	7		3	7	1
PF3D7_0922100	PF3D7_0922100	ubiquitin-like protein, putative	7			2	6
PF3D7_1130400	PF3D7_1130400	26S protease regulatory subunit 6A, putative	7		2		7
PF3D7_1301700	PF3D7_1301700	CX3CL1-binding protein 2	7			7
PF3D7_1365900;PF3D7_1211800;tr|M0R1M6|M0R1M6_HUMAN;tr|M0R2S1|M0R2S1_HUMAN;tr|F5H265|F5H265_HUMAN;tr|J3QS39|J3QS39_HUMAN;tr|J3QTR3|J3QTR3_HUMAN;tr|F5H6Q2|F5H6Q2_HUMAN;sp|P62987|RL40_HUMAN;tr|F5GYU3|F5GYU3_HUMAN;tr|F5H2Z3|F5H2Z3_HUMAN;tr|B4DV12|B4DV12_HUMAN	PF3D7_1365900	ubiquitin-60S ribosomal protein L40	7	5	6	5	7
PF3D7_0413900	PF3D7_0413900	ubiquitin carboxyl-terminal hydrolase 13, putative	6		2		6
PF3D7_0619400	PF3D7_0619400	cell division cycle protein 48 homologue, putative	6		1	2	5
PF3D7_0624600	PF3D7_0624600	SNF2 helicase, putative	6				6
PF3D7_0628300	PF3D7_0628300	choline/ethanolaminephosphotransferase, putative	6				6
PF3D7_0818200	PF3D7_0818200	14-3-3 protein	6				6
PF3D7_1003600	PF3D7_1003600	inner membrane complex protein 1c, putative	6			1	6
PF3D7_1011700	PF3D7_1011700	DNA repair protein RAD23, putative	6		3		6
PF3D7_1117700;tr|F5H018|F5H018_HUMAN;sp|P62826|RAN_HUMAN;tr|B5MDF5|B5MDF5_HUMAN;tr|J3KQE5|J3KQE5_HUMAN;tr|B4DV51|B4DV51_HUMAN	PF3D7_1117700	GTP-binding nuclear protein RAN/TC4	6	1	1	2	6
PF3D7_1202900	PF3D7_1202900	high mobility group protein B1	6		2		6
PF3D7_1342600	PF3D7_1342600	myosin A	6				6
PF3D7_1451100	PF3D7_1451100	elongation factor 2	6				6
PF3D7_1462800	PF3D7_1462800	glyceraldehyde-3-phosphate dehydrogenase	6		3		6
PF3D7_1465900	PF3D7_1465900	40S ribosomal protein S3	6	1	3	3	3
PF3D7_1466300	PF3D7_1466300	26S proteasome regulatory subunit RPN2, putative	6		1		6
PF3D7_0210600	PF3D7_0210600	conserved protein, unknown function	5				5
PF3D7_0318900	PF3D7_0318900	conserved protein, unknown function	5				5
PF3D7_0424600	PF3D7_0424600	Plasmodium exported protein (PHISTb), unknown function	5		3	5	3
PF3D7_0501000	PF3D7_0501000	Plasmodium exported protein, unknown function	5		1	5	3
PF3D7_0523400	PF3D7_0523400	DnaJ protein, putative	5			1	4
PF3D7_0528400	PF3D7_0528400	palmitoyltransferase DHHC7	5				5
PF3D7_0610400;PF3D7_0617900;tr|K7EK07|K7EK07_HUMAN;sp|Q6NXT2|H3C_HUMAN;sp|Q71DI3|H32_HUMAN;sp|Q16695|H31T_HUMAN;sp|P84243|H33_HUMAN;sp|P68431|H31_HUMAN	PF3D7_0610400	histone H3	5	1	3	2	5
PF3D7_0617800	PF3D7_0617800	histone H2A	5	1	4	3	5
PF3D7_0709700	PF3D7_0709700	prodrug activation and resistance esterase	5				5
PF3D7_0714000;sp|P57053|H2BFS_HUMAN	PF3D7_0714000	histone H2B variant	5	1	2	3	5
PF3D7_0826100	PF3D7_0826100	HECT-like E3 ubiquitin ligase, putative	5		3	1	5
PF3D7_0922500	PF3D7_0922500	phosphoglycerate kinase	5		1		5
PF3D7_1003500	PF3D7_1003500	40S ribosomal protein S20e, putative	5	3	4	4	4
PF3D7_1017500	PF3D7_1017500	myosin essential light chain ELC	5				5
PF3D7_1038000.1;PF3D7_1038000.2	PF3D7_1038000.1	antigen UB05	5		1	3	5
PF3D7_1102800	PF3D7_1102800	early transcribed membrane protein 11.2	5				5
PF3D7_1143100	PF3D7_1143100	AP2 domain transcription factor AP2-O, putative	5				5
PF3D7_1145400	PF3D7_1145400	dynamin-like protein	5				5
PF3D7_1225800	PF3D7_1225800	ubiquitin-activating enzyme E1	5		2		4
PF3D7_1236100	PF3D7_1236100	clustered-asparagine-rich protein	5				5
PF3D7_1342000	PF3D7_1342000	40S ribosomal protein S6	5		3	1	4
PF3D7_1343000	PF3D7_1343000	phosphoethanolamine N-methyltransferase	5		2		5
PF3D7_1356300	PF3D7_1356300	ubiquitin-conjugating enzyme E2, putative	5				5
PF3D7_1366800	PF3D7_1366800	phosphatidylserine synthase, putative	5				5
PF3D7_1370300	PF3D7_1370300	membrane associated histidine-rich protein 1	5		2	5
PF3D7_0103200	PF3D7_0103200	nucleoside transporter 4	4			2	3
PF3D7_0106300	PF3D7_0106300	calcium-transporting ATPase	4				4
PF3D7_0113200	PF3D7_0113200	Plasmodium exported protein, unknown function	4		1	3
PF3D7_0205900	PF3D7_0205900	26S proteasome regulatory subunit RPN1, putative	4				4
PF3D7_0209800	PF3D7_0209800	ATP-dependent RNA helicase UAP56	4				4
PF3D7_0320900	PF3D7_0320900	histone H2A.Z	4			2	4
PF3D7_0422300;PF3D7_0903700	PF3D7_0422300	alpha tubulin 2	4				4
PF3D7_0519700	PF3D7_0519700	FoP domain-containing protein, putative	4		2		4
PF3D7_0609800	PF3D7_0609800	palmitoyltransferase DHHC2, putative	4				4
PF3D7_0807300	PF3D7_0807300	ras-related protein Rab-18	4			1	4
PF3D7_0821400	PF3D7_0821400	conserved Plasmodium protein, unknown function	4				4
PF3D7_0917900	PF3D7_0917900	heat shock protein 70	4			1	4
PF3D7_0931400	PF3D7_0931400	PUB domain-containing protein, putative	4				4
PF3D7_1002100	PF3D7_1002100	EMP1-trafficking protein	4			4
PF3D7_1010300	PF3D7_1010300	succinate dehydrogenase subunit 4, putative	4			1	4
PF3D7_1015900	PF3D7_1015900	enolase	4		1		4
PF3D7_1020900	PF3D7_1020900	ADP-ribosylation factor	4				4
PF3D7_1102500	PF3D7_1102500	Plasmodium exported protein (PHISTb), unknown function	4			4
PF3D7_1105000;sp|P62805|H4_HUMAN	PF3D7_1105000	histone H4	4	1	1	1	4
PF3D7_1105100	PF3D7_1105100	histone H2B	4	2	4	4	4
PF3D7_1138400	PF3D7_1138400	guanylyl cyclase	4				4
PF3D7_1203900	PF3D7_1203900	ubiquitin-conjugating enzyme E2	4	1	3	2	4
PF3D7_1205500	PF3D7_1205500	zinc finger protein, putative	4				4
PF3D7_1211400	PF3D7_1211400	heat shock protein DNAJ homologue Pfj4	4				4
PF3D7_1219100	PF3D7_1219100	clathrin heavy chain, putative	4				4
PF3D7_1222700	PF3D7_1222700	glideosome-associated protein 45	4				4
PF3D7_1229100	PF3D7_1229100	multidrug resistance-associated protein 2	4				4
PF3D7_1302800	PF3D7_1302800	40S ribosomal protein S7, putative	4	2	3	2	4
PF3D7_1327300	PF3D7_1327300	conserved Plasmodium protein, unknown function	4				4
PF3D7_1330400.2;PF3D7_1330400.1	PF3D7_1330400.2	ER lumen protein retaining receptor 1, putative, unspecified product	4				4
PF3D7_1347200	PF3D7_1347200	nucleoside transporter 1	4		3	4	1
PF3D7_1354200	PF3D7_1354200	phosphoinositide phosphatase SAC1	4				4
PF3D7_1436300	PF3D7_1436300	translocon component PTEX150	4				4
PF3D7_1456800	PF3D7_1456800	V-type H(+)-translocating pyrophosphatase, putative	4			2	4
PF3D7_1478600	PF3D7_1478600	EMP1-trafficking protein	4			4
PF3D7_0109000	PF3D7_0109000	photosensitized INA-labeled protein PHIL1	3				3
PF3D7_0113900	PF3D7_0113900	CX3CL1-binding protein 1	3			3
PF3D7_0204700	PF3D7_0204700	hexose transporter	3	1	1	2	3
PF3D7_0206200	PF3D7_0206200	pantothenate transporter	3				3
PF3D7_0213100	PF3D7_0213100	protein SIS1	3				3
PF3D7_0304100	PF3D7_0304100	inner membrane complex protein 1e, putative	3				3
PF3D7_0417400	PF3D7_0417400	conserved Plasmodium protein, unknown function	3				3
PF3D7_0422700	PF3D7_0422700	eukaryotic initiation factor 4A-III, putative	3	1			3
PF3D7_0512600	PF3D7_0512600	ras-related protein Rab-1B	3				3
PF3D7_0525100	PF3D7_0525100	acyl-CoA synthetase	3				3
PF3D7_0527100	PF3D7_0527100	ubiquitin-conjugating enzyme E2 N, putative	3	3	2	2	3
PF3D7_0527500	PF3D7_0527500	Hsc70-interacting protein	3		1		3
PF3D7_0532400	PF3D7_0532400	lysine-rich membrane-associated PHISTb protein	3		1	3
PF3D7_0614300	PF3D7_0614300	major facilitator superfamily-related transporter, putative	3				3
PF3D7_0617200	PF3D7_0617200	conserved protein, unknown function	3				3
PF3D7_0617900	PF3D7_0617900	histone H3 variant	3	1	1	1	3
PF3D7_0618300	PF3D7_0618300	60S ribosomal protein L27a, putative	3		3	3	3
PF3D7_0630600	PF3D7_0630600	conserved protein, unknown function	3		3	1	2
PF3D7_0807800	PF3D7_0807800	26S proteasome regulatory subunit RPN10, putative	3				3
PF3D7_0808300	PF3D7_0808300	ubiquitin regulatory protein, putative	3		1		3
PF3D7_0819600	PF3D7_0819600	conserved protein, unknown function	3				3
PF3D7_0823800	PF3D7_0823800	DnaJ protein, putative	3				3
PF3D7_0826700	PF3D7_0826700	receptor for activated c kinase	3		1	1	3
PF3D7_0903700;tr|C9JDS9|C9JDS9_HUMAN;tr|F8VQQ4|F8VQQ4_HUMAN;tr|C9JEV8|C9JEV8_HUMAN;tr|C9JQ00|C9JQ00_HUMAN;tr|C9JJQ8|C9JJQ8_HUMAN;sp|Q13748|TBA3C_HUMAN;sp|Q71U36-2|TBA1A_HUMAN;sp|Q9BQE3|TBA1C_HUMAN;sp|Q71U36|TBA1A_HUMAN;tr|F5H5D3|F5H5D3_HUMAN;sp|P68363|TBA	PF3D7_0903700	alpha tubulin 1	3			1	3
PF3D7_0911100	PF3D7_0911100	conserved protein, unknown function	3				3
PF3D7_0916700	PF3D7_0916700	RNA-binding protein musashi, putative	3				3
PF3D7_0919100	PF3D7_0919100	DnaJ protein, putative	3				3
PF3D7_0926600	PF3D7_0926600	conserved Plasmodium membrane protein, unknown function	3	3
PF3D7_0934700	PF3D7_0934700	UBX domain-containing protein, putative	3		1	1	3
PF3D7_1004300	PF3D7_1004300	E3 ubiquitin-protein ligase, putative	3		2	2	3
PF3D7_1008700	PF3D7_1008700	tubulin beta chain	3			1	3
PF3D7_1019900	PF3D7_1019900	autophagy-related protein 8	3				3
PF3D7_1023000	PF3D7_1023000	conserved Plasmodium membrane protein, unknown function	3				3
PF3D7_1037500	PF3D7_1037500	dynamin-like protein	3				3
PF3D7_1113400	PF3D7_1113400	ubiquitin domain-containing protein DSK2, putative	3		1		3
PF3D7_1121600	PF3D7_1121600	exported protein 1	3			1	3
PF3D7_1125800	PF3D7_1125800	kelch domain-containing protein, putative	3	1			3
PF3D7_1128100	PF3D7_1128100	prefoldin subunit 5, putative	3				3
PF3D7_1129000	PF3D7_1129000	spermidine synthase	3			1	3
PF3D7_1129900	PF3D7_1129900	major facilitator superfamily-related transporter, putative	3		1	3
PF3D7_1130200	PF3D7_1130200	60S ribosomal protein P0	3		1	2	2
PF3D7_1132000	PF3D7_1132000	ubiquitin-like protein, putative	3				3
PF3D7_1138500	PF3D7_1138500	protein phosphatase PPM2	3		1		3
PF3D7_1142600	PF3D7_1142600	60S ribosomal protein L35ae, putative	3			3	1
PF3D7_1211900	PF3D7_1211900	non-SERCA-type Ca2+ -transporting P-ATPase	3		1	2	3
PF3D7_1216400	PF3D7_1216400	conserved Plasmodium membrane protein, unknown function	3				3
PF3D7_1238800	PF3D7_1238800	acyl-CoA synthetase	3				3
PF3D7_1242700	PF3D7_1242700	40S ribosomal protein S17, putative	3		2	3	1
PF3D7_1244600	PF3D7_1244600	ADP-ribosylation factor GTPase-activating protein	3				3
PF3D7_1246400	PF3D7_1246400	myosin A tail domain interacting protein	3				3
PF3D7_1248500	PF3D7_1248500	bax inhibitor 1, putative	3	1	2	2	3
PF3D7_1302000	PF3D7_1302000	EMP1-trafficking protein	3			3	1
PF3D7_1309100	PF3D7_1309100	60S ribosomal protein L24, putative	3			3
PF3D7_1319100	PF3D7_1319100	ubiquitin carboxyl-terminal hydrolase MINDY, putative	3				3
PF3D7_1323100	PF3D7_1323100	60S ribosomal protein L6, putative	3	1	2	3	1
PF3D7_1340900	PF3D7_1340900	sodium-dependent phosphate transporter	3			1	2
PF3D7_1353600	PF3D7_1353600	ER lumen protein retaining receptor	3			1	3
PF3D7_1407800	PF3D7_1407800	plasmepsin IV	3	1		2	3
PF3D7_1409400	PF3D7_1409400	conserved protein, unknown function	3				3
PF3D7_1410400	PF3D7_1410400	rhoptry-associated protein 1	3	3
PF3D7_1423300	PF3D7_1423300	serine/threonine protein phosphatase 7	3	1			3
PF3D7_1437900	PF3D7_1437900	HSP40, subfamily A	3				3
PF3D7_1439800	PF3D7_1439800	vesicle-associated membrane protein, putative	3			2	3
PF3D7_1447900	PF3D7_1447900	multidrug resistance protein 2	3		1	3
PF3D7_1449200	PF3D7_1449200	conserved Plasmodium protein, unknown function	3		1		3
PF3D7_1473200	PF3D7_1473200	DnaJ protein, putative	3		2		1
PF3D7_0108500	PF3D7_0108500	conserved Plasmodium protein, unknown function	2				2
PF3D7_0114000	PF3D7_0114000	exported protein family 1	2			2
PF3D7_0201900	PF3D7_0201900	erythrocyte membrane protein 3	2		1	2
PF3D7_0202500	PF3D7_0202500	early transcribed membrane protein 2	2				2
PF3D7_0214800	PF3D7_0214800	conserved Plasmodium membrane protein, unknown function	2			2
PF3D7_0217500	PF3D7_0217500	calcium-dependent protein kinase 1	2			1	2
PF3D7_0307700	PF3D7_0307700	conserved Plasmodium protein, unknown function	2				2
PF3D7_0316700	PF3D7_0316700	protein YOP1, putative	2				2
PF3D7_0318700	PF3D7_0318700	conserved Plasmodium protein, unknown function	2				2
PF3D7_0320100	PF3D7_0320100	protein transport protein SEC22	2				2
PF3D7_0322900	PF3D7_0322900	40S ribosomal protein S3A, putative	2			2
PF3D7_0401800	PF3D7_0401800	Plasmodium exported protein (PHISTb), unknown function	2		2	2
PF3D7_0403800	PF3D7_0403800	alpha/beta hydrolase, putative	2				2
PF3D7_0405900	PF3D7_0405900	apical sushi protein	2		2		2
PF3D7_0416800	PF3D7_0416800	small GTP-binding protein sar1	2			1	2
PF3D7_0420300	PF3D7_0420300	AP2 domain transcription factor, putative	2				2
PF3D7_0423500	PF3D7_0423500	glideosome associated protein with multiple membrane spans 2	2				2
PF3D7_0513800	PF3D7_0513800	ras-related protein Rab-1A	2			1	2
PF3D7_0515700	PF3D7_0515700	glideosome-associated protein 40, putative	2				2
PF3D7_0516700	PF3D7_0516700	ubiquitin carboxyl-terminal hydrolase 2, putative	2				2
PF3D7_0517700	PF3D7_0517700	eukaryotic translation initiation factor 3 subunit B, putative	2				2
PF3D7_0530100	PF3D7_0530100	SNARE protein, putative	2				2
PF3D7_0607400	PF3D7_0607400	G-protein associated signal transduction protein, putative	2				2
PF3D7_0613700	PF3D7_0613700	syntaxin-binding protein, putative	2				2
PF3D7_0614500	PF3D7_0614500	60S ribosomal protein L19	2		2		1
PF3D7_0621200	PF3D7_0621200	pyridoxine biosynthesis protein PDX1	2		1	1	2
PF3D7_0626800	PF3D7_0626800	pyruvate kinase	2				2
PF3D7_0702400	PF3D7_0702400	small exported membrane protein 1	2		1	2	1
PF3D7_0702500	PF3D7_0702500	Plasmodium exported protein, unknown function	2		1	1
PF3D7_0705400	PF3D7_0705400	DNA replication licensing factor MCM7	2		2
PF3D7_0708800	PF3D7_0708800	heat shock protein 110	2		1		2
PF3D7_0718500	PF3D7_0718500	prefoldin subunit 3, putative	2		1		1
PF3D7_0721400	PF3D7_0721400	rhoptry protein, putative	2				2
PF3D7_0801000	PF3D7_0801000	Plasmodium exported protein (PHISTc), unknown function	2			2
PF3D7_0802000	PF3D7_0802000	glutamate dehydrogenase, putative	2				2
PF3D7_0806300	PF3D7_0806300	ferlin-like protein, putative	2				2
PF3D7_0810300	PF3D7_0810300	protein phosphatase PPM5, putative	2				2
PF3D7_0812400	PF3D7_0812400	karyopherin alpha	2		1	1	2
PF3D7_0814200	PF3D7_0814200	DNA/RNA-binding protein Alba 1	2			1	2
PF3D7_0815200	PF3D7_0815200	importin subunit beta, putative	2				2
PF3D7_0817700	PF3D7_0817700	rhoptry neck protein 5	2	2
PF3D7_0831200	PF3D7_0831200	DnaJ protein, putative	2		1	2
PF3D7_0831700	PF3D7_0831700	heat shock protein 70	2			1	1
PF3D7_0903100	PF3D7_0903100	protein RER1, putative	2				2
PF3D7_0903600.1	PF3D7_0903600.1	conserved protein, unknown function, unspecified product	2				2
PF3D7_0929400	PF3D7_0929400	high molecular weight rhoptry protein 2	2		1	2	2
PF3D7_0934800	PF3D7_0934800	cAMP-dependent protein kinase catalytic subunit	2				2
PF3D7_1002700	PF3D7_1002700	conserved Plasmodium protein, unknown function	2				2
PF3D7_1011400	PF3D7_1011400	proteasome subunit beta type-5	2				2
PF3D7_1011800	PF3D7_1011800	PRE-binding protein	2				2
PF3D7_1016400	PF3D7_1016400	serine/threonine protein kinase, FIKK family	2		1	2	1
PF3D7_1019400	PF3D7_1019400	60S ribosomal protein L30e, putative	2		1		2
PF3D7_1023900	PF3D7_1023900	chromodomain-helicase-DNA-binding protein 1 homolog, putative	2				2
PF3D7_1024800	PF3D7_1024800	exported protein 3	2	1		2	1
PF3D7_1026600	PF3D7_1026600	conserved Plasmodium protein, unknown function	2				2
PF3D7_1115700;PF3D7_1115300	PF3D7_1115700	cysteine proteinase falcipain 2a	2		1	1	1
PF3D7_1115800	PF3D7_1115800	conserved Plasmodium protein, unknown function	2				2
PF3D7_1120100	PF3D7_1120100	phosphoglycerate mutase, putative	2		1		2
PF3D7_1122300	PF3D7_1122300	conserved Plasmodium protein, unknown function	2				2
PF3D7_1125700	PF3D7_1125700	kelch domain-containing protein, putative	2				2
PF3D7_1134800	PF3D7_1134800	coatomer subunit delta	2	1	2	2	2
PF3D7_1136500.1;PF3D7_1136500.2	PF3D7_1136500.1	casein kinase 1	2				2
PF3D7_1142700	PF3D7_1142700	methyltransferase, putative	2				2
PF3D7_1144900	PF3D7_1144900	ras-related protein Rab-6	2			1	2
PF3D7_1149000	PF3D7_1149000	antigen 332, DBL-like protein	2			2
PF3D7_1201200	PF3D7_1201200	Plasmodium exported protein (PHISTa-like), unknown function	2				2
PF3D7_1206200	PF3D7_1206200	eukaryotic translation initiation factor 3 subunit C, putative	2				2
PF3D7_1214900	PF3D7_1214900	conserved protein, unknown function	2				2
PF3D7_1223100	PF3D7_1223100	cAMP-dependent protein kinase regulatory subunit	2			1	2
PF3D7_1226800	PF3D7_1226800	ataxin-3, putative	2				2
PF3D7_1238600	PF3D7_1238600	sphingomyelin phosphodiesterase	2	1	1	1	2
PF3D7_1246300	PF3D7_1246300	clathrin adaptor domain-containing protein, putative	2				2
PF3D7_1303200.2;PF3D7_1303200.1	PF3D7_1303200.2	SNARE protein, putative	2				2
PF3D7_1304500	PF3D7_1304500	small heat shock protein, putative	2				2
PF3D7_1306400	PF3D7_1306400	26S protease regulatory subunit 10B, putative	2	1	1	1	2
PF3D7_1310700	PF3D7_1310700	RNA-binding protein, putative	2				2
PF3D7_1317400	PF3D7_1317400	zinc finger protein, putative	2				2
PF3D7_1320700;sp|Q96Q89-4|KI20B_HUMAN;sp|Q96Q89-3|KI20B_HUMAN;sp|Q96Q89|KI20B_HUMAN;sp|Q96Q89-2|KI20B_HUMAN;sp|Q96Q89-5|KI20B_HUMAN;PF3D7_1243900	PF3D7_1320700	conserved Plasmodium protein, unknown function	2		1		2
PF3D7_1321400	PF3D7_1321400	palmitoyltransferase DHHC8, putative	2				2
PF3D7_1321800	PF3D7_1321800	protein transport protein SFT2, putative	2				2
PF3D7_1322100	PF3D7_1322100	histone-lysine N-methyltransferase SET2	2		2
PF3D7_1323700	PF3D7_1323700	glideosome associated protein with multiple membrane spans 1	2		1	1	2
PF3D7_1338200	PF3D7_1338200	60S ribosomal protein L6, putative	2		1	1	2
PF3D7_1341200	PF3D7_1341200	60S ribosomal protein L18, putative	2			2
PF3D7_1347700	PF3D7_1347700	ethanolamine-phosphate cytidylyltransferase	2				2
PF3D7_1351400	PF3D7_1351400	60S ribosomal protein L17, putative	2			1	1
PF3D7_1368900	PF3D7_1368900	conserved protein, unknown function	2				2
PF3D7_1401400	PF3D7_1401400	early transcribed membrane protein 14.1	2				2
PF3D7_1409800	PF3D7_1409800	CUGBP Elav-like family member 2, putative	2				2
PF3D7_1409900	PF3D7_1409900	cytidine diphosphate-diacylglycerol synthase	2				2
PF3D7_1411200	PF3D7_1411200	rhomboid protease ROM8	2				2
PF3D7_1413700	PF3D7_1413700	conserved Plasmodium protein, unknown function	2				2
PF3D7_1414000	PF3D7_1414000	26S proteasome regulatory subunit RPN13, putative	2	1	1	1	2
PF3D7_1416500	PF3D7_1416500	NADP-specific glutamate dehydrogenase	2				2
PF3D7_1422500	PF3D7_1422500	ERAD-associated E3 ubiquitin-protein ligase HRD1	2			2	2
PF3D7_1438100	PF3D7_1438100	translocation protein SEC62, putative	2				2
PF3D7_1438400	PF3D7_1438400	metacaspase-2	2		1		1
PF3D7_1439500	PF3D7_1439500	oocyst rupture protein 2, putative	2				2
PF3D7_1444300	PF3D7_1444300	1-acyl-sn-glycerol-3-phosphate acyltransferase, putative	2				2
PF3D7_1457200	PF3D7_1457200	thioredoxin 1	2				2
PF3D7_1457900	PF3D7_1457900	conserved Plasmodium protein, unknown function	2				2
PF3D7_1459400	PF3D7_1459400	conserved protein, unknown function	2				2
PF3D7_1471100	PF3D7_1471100	exported protein 2	2				2
PF3D7_0104200	PF3D7_0104200	StAR-related lipid transfer protein	1		1		1
PF3D7_0104800	PF3D7_0104800	novel putative transporter 1, putative	1				1
PF3D7_0107000;sp|Q12798|CETN1_HUMAN	PF3D7_0107000	centrin-1	1				1
PF3D7_0110900	PF3D7_0110900	adenylate kinase-like protein 1	1				1
PF3D7_0202400	PF3D7_0202400	translation-enhancing factor	1			1
PF3D7_0204200	PF3D7_0204200	conserved Plasmodium protein, unknown function	1				1
PF3D7_0210000	PF3D7_0210000	secretory complex protein 61 gamma subunit	1				1
PF3D7_0210900	PF3D7_0210900	conserved Plasmodium protein, unknown function	1				1
PF3D7_0212100	PF3D7_0212100	conserved Plasmodium protein, unknown function	1		1
PF3D7_0212500	PF3D7_0212500	conserved Plasmodium protein, unknown function	1				1
PF3D7_0219600	PF3D7_0219600	replication factor C subunit 1, putative	1				1
PF3D7_0222100;PF3D7_0114100;PF3D7_1101700;PF3D7_1039700;PF3D7_0631400;PF3D7_0324100;PF3D7_0601200;PF3D7_0101300	PF3D7_0222100	Pfmc-2TM Maurer's cleft two transmembrane protein	1		1
PF3D7_0301700	PF3D7_0301700	Plasmodium exported protein, unknown function	1			1
PF3D7_0304200	PF3D7_0304200	EH domain-containing protein	1				1
PF3D7_0306300	PF3D7_0306300	glutaredoxin 1	1				1
PF3D7_0307100	PF3D7_0307100	40S ribosomal protein S12, putative	1		1	1	1
PF3D7_0307200	PF3D7_0307200	60S ribosomal protein L7, putative	1		1		1
PF3D7_0307500	PF3D7_0307500	spindle and kinetochore-associated protein 2, putative	1				1
PF3D7_0308300	PF3D7_0308300	conserved Plasmodium protein, unknown function	1				1
PF3D7_0309500	PF3D7_0309500	asparagine synthetase [glutamine-hydrolyzing], putative	1				1
PF3D7_0309600	PF3D7_0309600	60S acidic ribosomal protein P2	1		1		1
PF3D7_0312800	PF3D7_0312800	60S ribosomal protein L26, putative	1		1
PF3D7_0314100.1	PF3D7_0314100.1	vesicle transport v-SNARE protein, putative	1				1
PF3D7_0317600	PF3D7_0317600	40S ribosomal protein S11, putative	1			1
PF3D7_0321400	PF3D7_0321400	protein kinase, putative	1				1
PF3D7_0322300	PF3D7_0322300	diacylglycerol O-acyltransferase	1				1
PF3D7_0402400	PF3D7_0402400	Plasmodium exported protein, unknown function	1			1
PF3D7_0405200	PF3D7_0405200	ag-1 blood stage membrane protein homologue	1				1
PF3D7_0405600	PF3D7_0405600	TMEM33 domain-containing protein, putative	1				1
PF3D7_0406200	PF3D7_0406200	sexual stage-specific protein precursor	1			1
PF3D7_0406700	PF3D7_0406700	conserved Plasmodium protein, unknown function	1				1
PF3D7_0414600	PF3D7_0414600	acylated pleckstrin-homology domain-containing protein, putative	1				1
PF3D7_0417600	PF3D7_0417600	conserved Plasmodium protein, unknown function	1				1
PF3D7_0419600	PF3D7_0419600	ran-specific GTPase-activating protein 1, putative	1				1
PF3D7_0422400	PF3D7_0422400	40S ribosomal protein S19	1				1
PF3D7_0423700	PF3D7_0423700	early transcribed membrane protein 4	1			1
PF3D7_0501300	PF3D7_0501300	skeleton-binding protein 1	1			1
PF3D7_0503300	PF3D7_0503300	serine/arginine-rich splicing factor 12	1				1
PF3D7_0503400	PF3D7_0503400	actin-depolymerizing factor 1	1				1
PF3D7_0503800	PF3D7_0503800	60S ribosomal protein L31	1		1		1
PF3D7_0504900	PF3D7_0504900	conserved protein, unknown function	1				1
PF3D7_0505500	PF3D7_0505500	DNA mismatch repair protein MSH6, putative	1		1
PF3D7_0507700	PF3D7_0507700	nuclear protein localization protein 4, putative	1				1
PF3D7_0508300	PF3D7_0508300	triose phosphate transporter	1			1
PF3D7_0510200	PF3D7_0510200	peptidyl-prolyl cis-trans isomerase	1				1
PF3D7_0510500	PF3D7_0510500	topoisomerase I	1				1
PF3D7_0512000	PF3D7_0512000	prefoldin subunit 6, putative	1		1		1
PF3D7_0515000	PF3D7_0515000	pre-mRNA-splicing factor CWC2, putative	1				1
PF3D7_0516200	PF3D7_0516200	40S ribosomal protein S11	1			1	1
PF3D7_0516900	PF3D7_0516900	60S ribosomal protein L2	1			1	1
PF3D7_0517000	PF3D7_0517000	60S ribosomal protein L12, putative	1				1
PF3D7_0517300	PF3D7_0517300	serine/arginine-rich splicing factor 1	1				1
PF3D7_0517400	PF3D7_0517400	FACT complex subunit SPT16, putative	1				1
PF3D7_0520900	PF3D7_0520900	adenosylhomocysteinase	1				1
PF3D7_0522600	PF3D7_0522600	inner membrane complex protein	1				1
PF3D7_0523800	PF3D7_0523800	divalent metal transporter, putative	1		1	1
PF3D7_0525400	PF3D7_0525400	7-helix-1 protein	1				1
PF3D7_0527000	PF3D7_0527000	DNA replication licensing factor MCM3, putative	1		1
PF3D7_0532300	PF3D7_0532300	Plasmodium exported protein (PHISTb), unknown function	1			1
PF3D7_0605900	PF3D7_0605900	long chain polyunsaturated fatty acid elongation enzyme, putative	1				1
PF3D7_0606900	PF3D7_0606900	glutaredoxin-like protein	1				1
PF3D7_0609000	PF3D7_0609000	nucleoporin NUP637, putative	1				1
PF3D7_0613100	PF3D7_0613100	conserved Plasmodium protein, unknown function	1		1	1	1
PF3D7_0613300	PF3D7_0613300	rhoptry protein ROP14	1				1
PF3D7_0619000.1;PF3D7_0619000.2	PF3D7_0619000.1	conserved protein, unknown function	1				1
PF3D7_0621100	PF3D7_0621100	conserved Plasmodium protein, unknown function	1				1
PF3D7_0624000	PF3D7_0624000	hexokinase	1				1
PF3D7_0627300	PF3D7_0627300	E3 ubiquitin-protein ligase RNF5, putative	1		1	1	1
PF3D7_0627500	PF3D7_0627500	protein DJ-1	1				1
PF3D7_0629800	PF3D7_0629800	cullin-like protein, putative	1	1	1	1	1
PF3D7_0704100	PF3D7_0704100	conserved Plasmodium membrane protein, unknown function	1				1
PF3D7_0704800	PF3D7_0704800	protein phosphatase PPM12, putative	1				1
PF3D7_0707700	PF3D7_0707700	E3 ubiquitin-protein ligase, putative	1				1
PF3D7_0709000	PF3D7_0709000	chloroquine resistance transporter	1			1
PF3D7_0710000	PF3D7_0710000	conserved Plasmodium protein, unknown function	1				1
PF3D7_0715800	PF3D7_0715800	drug/metabolite transporter DMT1, putative	1			1
PF3D7_0716800	PF3D7_0716800	eukaryotic translation initiation factor 3 subunit I, putative	1				1
PF3D7_0719600	PF3D7_0719600	60S ribosomal protein L11a, putative	1			1
PF3D7_0719900	PF3D7_0719900	conserved Plasmodium membrane protein, unknown function	1		1
PF3D7_0722400	PF3D7_0722400	Obg-like ATPase 1, putative	1				1
PF3D7_0730300	PF3D7_0730300	AP2 domain transcription factor AP2-L, putative	1				1
PF3D7_0730400	PF3D7_0730400	IMP1-like protein, putative	1				1
PF3D7_0731300	PF3D7_0731300	Plasmodium exported protein (PHISTb), unknown function	1			1
PF3D7_0731500	PF3D7_0731500	erythrocyte binding antigen-175	1				1
PF3D7_0731600;PF3D7_1477900	PF3D7_0731600	acyl-CoA synthetase	1		1	1
PF3D7_0801800	PF3D7_0801800	mannose-6-phosphate isomerase, putative	1				1
PF3D7_0802200	PF3D7_0802200	1-cys peroxiredoxin	1				1
PF3D7_0803700	PF3D7_0803700	tubulin gamma chain	1				1
PF3D7_0803800;PF3D7_0524900	PF3D7_0803800	proteasome subunit beta type-4	1				1
PF3D7_0805600	PF3D7_0805600	PAP2-like protein, putative	1				1
PF3D7_0806500	PF3D7_0806500	DnaJ protein, putative	1				1
PF3D7_0806800	PF3D7_0806800	V-type proton ATPase subunit a, putative	1			1
PF3D7_0811000	PF3D7_0811000	cullin-1, putative	1	1	1	1	1
PF3D7_0812500	PF3D7_0812500	RNA-binding protein, putative	1		1
PF3D7_0813100	PF3D7_0813100	conserved Plasmodium protein, unknown function	1				1
PF3D7_0813300	PF3D7_0813300	conserved protein, unknown function	1		1		1
PF3D7_0813900	PF3D7_0813900	40S ribosomal protein S16, putative	1			1
PF3D7_0814000	PF3D7_0814000	60S ribosomal protein L13-2, putative	1		1		1
PF3D7_0814500	PF3D7_0814500	conserved protein, unknown function	1	1
PF3D7_0817500	PF3D7_0817500	histidine triad nucleotide-binding protein 1	1		1	1	1
PF3D7_0818500	PF3D7_0818500	zinc finger protein, putative	1				1
PF3D7_0819500	PF3D7_0819500	conserved protein, unknown function	1			1
PF3D7_0821000	PF3D7_0821000	conserved Plasmodium protein, unknown function	1				1
PF3D7_0821800	PF3D7_0821800	protein transport protein SEC61 subunit beta, putative	1			1	1
PF3D7_0823300	PF3D7_0823300	histone acetyltransferase GCN5	1			1
PF3D7_0825300	PF3D7_0825300	SAYSvFN domain-containing protein, putative	1				1
PF3D7_0826500	PF3D7_0826500	ubiquitin conjugation factor E4 B, putative	1				1
PF3D7_0828300	PF3D7_0828300	conserved protein, unknown function	1				1
PF3D7_0903200	PF3D7_0903200	ras-related protein RAB7	1				1
PF3D7_0903400	PF3D7_0903400	ATP-dependent RNA helicase DDX60, putative	1				1
PF3D7_0904600	PF3D7_0904600	ubiquitin specific protease, putative	1		1	1	1
PF3D7_0904800	PF3D7_0904800	replication protein A1, small fragment	1				1
PF3D7_0904900	PF3D7_0904900	copper-transporting ATPase	1			1	1
PF3D7_0908000	PF3D7_0908000	plasma membrane protein 1, putative	1				1
PF3D7_0913200	PF3D7_0913200	elongation factor 1-beta	1				1
PF3D7_0914600	PF3D7_0914600	transcription elongation factor 1, putative	1				1
PF3D7_0914700	PF3D7_0914700	major facilitator superfamily-related transporter, putative	1			1
PF3D7_0915000	PF3D7_0915000	type II NADH:ubiquinone oxidoreductase	1				1
PF3D7_0915400	PF3D7_0915400	ATP-dependent 6-phosphofructokinase	1				1
PF3D7_0917300	PF3D7_0917300	conserved protein, unknown function	1				1
PF3D7_0918700	PF3D7_0918700	conserved Plasmodium protein, unknown function	1				1
PF3D7_0920500	PF3D7_0920500	ADP-ribosylation factor, putative	1				1
PF3D7_0920800	PF3D7_0920800	inosine-5'-monophosphate dehydrogenase	1				1
PF3D7_0921000.1;PF3D7_0921000.2	PF3D7_0921000.1	ubiquitin-conjugating enzyme E2, putative	1				1
PF3D7_0924400	PF3D7_0924400	conserved Plasmodium protein, unknown function	1				1
PF3D7_0925700	PF3D7_0925700	histone deacetylase 1	1				1
PF3D7_0932000	PF3D7_0932000	conserved Plasmodium protein, unknown function	1				1
PF3D7_0932100	PF3D7_0932100	protein MAM3, putative	1				1
PF3D7_0936900	PF3D7_0936900	Plasmodium exported protein (PHISTb), unknown function, pseudogene	1			1
PF3D7_1001600	PF3D7_1001600	exported lipase 2	1		1
PF3D7_1002400.1;PF3D7_1002400.2	PF3D7_1002400.1	transformer-2 protein homolog beta, putative	1				1
PF3D7_1002900	PF3D7_1002900	conserved Plasmodium protein, unknown function	1				1
PF3D7_1008400	PF3D7_1008400	26S protease regulatory subunit 4, putative	1				1
PF3D7_1010200	PF3D7_1010200	DNA2/NAM7 helicase, putative	1			1
PF3D7_1011200.1	PF3D7_1011200.1	BET1-like protein, putative, unspecified product	1				1
PF3D7_1012400	PF3D7_1012400	hypoxanthine-guanine phosphoribosyltransferase	1		1		1
PF3D7_1012600	PF3D7_1012600	GMP synthase [glutamine-hydrolyzing]	1				1
PF3D7_1018300	PF3D7_1018300	peptidase, putative	1				1
PF3D7_1019000	PF3D7_1019000	eukaryotic translation initiation factor subunit eIF2A, putative	1				1
PF3D7_1022700	PF3D7_1022700	phospholipid scramblase, putative	1				1
PF3D7_1025000	PF3D7_1025000	EF-hand calcium-binding domain-containing protein, putative	1				1
PF3D7_1025900	PF3D7_1025900	conserved protein, unknown function	1				1
PF3D7_1027400	PF3D7_1027400	DNA-directed RNA polymerase II subunit RPB7, putative	1				1
PF3D7_1028200	PF3D7_1028200	RING zinc finger protein, putative	1				1
PF3D7_1029600	PF3D7_1029600	adenosine deaminase	1		1		1
PF3D7_1030500	PF3D7_1030500	26S proteasome regulatory subunit RPN9, putative	1				1
PF3D7_1031700	PF3D7_1031700	protein phosphatase inhibitor 3	1				1
PF3D7_1034500	PF3D7_1034500	conserved Plasmodium protein, unknown function	1				1
PF3D7_1036900	PF3D7_1036900	conserved Plasmodium protein, unknown function	1				1
PF3D7_1104100	PF3D7_1104100	syntaxin, Qa-SNARE family	1				1
PF3D7_1104300	PF3D7_1104300	conserved Plasmodium protein, unknown function	1				1
PF3D7_1105700	PF3D7_1105700	tRNA-splicing ligase RtcB, putative	1				1
PF3D7_1110100	PF3D7_1110100	conserved Plasmodium protein, unknown function	1				1
PF3D7_1110400	PF3D7_1110400	RNA-binding protein, putative	1				1
PF3D7_1111900	PF3D7_1111900	Josephin domain-containing protein, putative	1				1
PF3D7_1115400	PF3D7_1115400	cysteine proteinase falcipain 3	1				1
PF3D7_1116000	PF3D7_1116000	rhoptry neck protein 4	1	1
PF3D7_1116100	PF3D7_1116100	serine esterase, putative	1				1
PF3D7_1116500	PF3D7_1116500	folate transporter 2	1				1
PF3D7_1119000	PF3D7_1119000	acyl-CoA-binding protein, putative	1				1
PF3D7_1121100	PF3D7_1121100	conserved protein, unknown function	1				1
PF3D7_1124200	PF3D7_1124200	thioredoxin-like protein, putative	1				1
PF3D7_1124600	PF3D7_1124600	ethanolamine kinase	1				1
PF3D7_1126200	PF3D7_1126200	40S ribosomal protein S18, putative	1				1
PF3D7_1130700	PF3D7_1130700	structural maintenance of chromosomes protein 1, putative	1		1
PF3D7_1133400	PF3D7_1133400	apical membrane antigen 1	1				1
PF3D7_1136000	PF3D7_1136000	conserved Plasmodium protein, unknown function	1		1
PF3D7_1140600	PF3D7_1140600	conserved Plasmodium protein, unknown function	1				1
PF3D7_1142100	PF3D7_1142100	conserved Plasmodium protein, unknown function	1				1
PF3D7_1146000	PF3D7_1146000	ribosome assembly protein 4, putative	1				1
PF3D7_1147900	PF3D7_1147900	peroxisome assembly protein 22, putative	1				1
PF3D7_1203700	PF3D7_1203700	nucleosome assembly protein	1				1
PF3D7_1205600	PF3D7_1205600	tetratricopeptide repeat protein, putative	1				1
PF3D7_1205900	PF3D7_1205900	conserved protein, unknown function	1				1
PF3D7_1206800	PF3D7_1206800	conserved Plasmodium protein, unknown function	1				1
PF3D7_1213600;sp|P63167|DYL1_HUMAN;tr|F8VXL2|F8VXL2_HUMAN;tr|F8VRV5|F8VRV5_HUMAN	PF3D7_1213600	dynein light chain 1, putative	1				1
PF3D7_1213700	PF3D7_1213700	DNA-directed RNA polymerases I, II, and III subunit RPABC3, putative	1				1
PF3D7_1213800	PF3D7_1213800	proline--tRNA ligase	1				1
PF3D7_1215400	PF3D7_1215400	conserved Plasmodium protein, unknown function	1		1	1	1
PF3D7_1216200	PF3D7_1216200	glycerol-3-phosphate dehydrogenase [NAD(+)], putative	1				1
PF3D7_1221200	PF3D7_1221200	conserved Plasmodium protein, unknown function	1				1
PF3D7_1229400	PF3D7_1229400	macrophage migration inhibitory factor	1				1
PF3D7_1229500	PF3D7_1229500	T-complex protein 1 subunit gamma	1				1
PF3D7_1231100	PF3D7_1231100	ras-related protein Rab-2	1				1
PF3D7_1233300	PF3D7_1233300	pentatricopeptide repeat domain-containing protein, putative	1				1
PF3D7_1235600	PF3D7_1235600	serine hydroxymethyltransferase	1				1
PF3D7_1238000	PF3D7_1238000	COPI associated protein, putative	1		1		1
PF3D7_1238100	PF3D7_1238100	calcyclin binding protein, putative	1				1
PF3D7_1245900	PF3D7_1245900	ankyrin-repeat protein, putative	1				1
PF3D7_1248900;tr|J3KRP2|J3KRP2_HUMAN;tr|J3QSA9|J3QSA9_HUMAN;tr|J3QQM1|J3QQM1_HUMAN;tr|J3QRR3|J3QRR3_HUMAN;tr|J3QLH6|J3QLH6_HUMAN;tr|J3QRW1|J3QRW1_HUMAN;PF3D7_1306400;sp|P62195-2|PRS8_HUMAN;sp|P62195|PRS8_HUMAN	PF3D7_1248900	26S protease regulatory subunit 8, putative	1	1
PF3D7_1309300	PF3D7_1309300	U4/U6 small nuclear ribonucleoprotein PRP3, putative	1				1
PF3D7_1311500	PF3D7_1311500	26S protease regulatory subunit 7, putative	1				1
PF3D7_1311900	PF3D7_1311900	V-type proton ATPase catalytic subunit A	1				1
PF3D7_1312900	PF3D7_1312900	eukaryotic translation initation factor 4 gamma	1				1
PF3D7_1313000	PF3D7_1313000	ubiquitin-like protein nedd8 homologue, putative	1				1
PF3D7_1316600	PF3D7_1316600	choline-phosphate cytidylyltransferase	1				1
PF3D7_1318800	PF3D7_1318800	translocation protein SEC63, putative	1				1
PF3D7_1320600	PF3D7_1320600	ras-related protein Rab-11A	1				1
PF3D7_1321500.2;PF3D7_1321500.1	PF3D7_1321500.2	3',5'-cyclic nucleotide phosphodiesterase beta, unspecified product	1		1	1	1
PF3D7_1323200	PF3D7_1323200	V-type proton ATPase subunit G, putative	1			1	1
PF3D7_1324700	PF3D7_1324700	SNARE protein, putative	1				1
PF3D7_1324900	PF3D7_1324900	L-lactate dehydrogenase	1	1	1		1
PF3D7_1328500	PF3D7_1328500	alpha/beta-hydrolase, putative	1				1
PF3D7_1332000	PF3D7_1332000	syntaxin, Qa-SNARE family	1				1
PF3D7_1332200	PF3D7_1332200	conserved protein, unknown function	1				1
PF3D7_1333200	PF3D7_1333200	ubiquitin-activating enzyme	1				1
PF3D7_1335600	PF3D7_1335600	conserved Plasmodium protein, unknown function	1				1
PF3D7_1338100	PF3D7_1338100	26S proteasome regulatory subunit RPN3, putative	1		1		1
PF3D7_1344300	PF3D7_1344300	zinc finger protein, putative	1				1
PF3D7_1344800	PF3D7_1344800	aspartate carbamoyltransferase	1			1
PF3D7_1346100	PF3D7_1346100	protein transport protein SEC61 subunit alpha	1				1
PF3D7_1346400	PF3D7_1346400	VPS13 domain-containing protein, putative	1				1
PF3D7_1349700	PF3D7_1349700	peptidase, putative	1				1
PF3D7_1357800	PF3D7_1357800	T-complex protein 1 subunit delta	1				1
PF3D7_1357900	PF3D7_1357900	pyrroline-5-carboxylate reductase, putative	1				1
PF3D7_1358200	PF3D7_1358200	conserved Plasmodium protein, unknown function	1		1
PF3D7_1358400	PF3D7_1358400	conserved Plasmodium protein, unknown function	1				1
PF3D7_1358700	PF3D7_1358700	YOP1-like protein, putative	1				1
PF3D7_1358800	PF3D7_1358800	40S ribosomal protein S15	1				1
PF3D7_1360900	PF3D7_1360900	RNA-binding protein, putative	1				1
PF3D7_1361100	PF3D7_1361100	protein transport protein Sec24A	1				1
PF3D7_1361800	PF3D7_1361800	glideosome-associated connector	1				1
PF3D7_1361900	PF3D7_1361900	proliferating cell nuclear antigen 1	1		1		1
PF3D7_1362700	PF3D7_1362700	conserved Plasmodium protein, unknown function	1			1
PF3D7_1363400	PF3D7_1363400	polyubiquitin binding protein, putative	1				1
PF3D7_1365700	PF3D7_1365700	SNARE associated Golgi protein, putative	1				1
PF3D7_1368100	PF3D7_1368100	26S proteasome regulatory subunit RPN11, putative	1				1
PF3D7_1368200	PF3D7_1368200	ABC transporter E family member 1, putative	1				1
PF3D7_1402500	PF3D7_1402500	ribosomal protein S27a, putative	1		1	1
PF3D7_1407100	PF3D7_1407100	rRNA 2'-O-methyltransferase fibrillarin, putative	1				1
PF3D7_1408000	PF3D7_1408000	plasmepsin II	1			1
PF3D7_1409600	PF3D7_1409600	conserved Plasmodium protein, unknown function	1			1
PF3D7_1414400	PF3D7_1414400	serine/threonine protein phosphatase PP1	1				1
PF3D7_1418000	PF3D7_1418000	ubiquitin fusion degradation protein 1, putative	1				1
PF3D7_1424100	PF3D7_1424100	60S ribosomal protein L5, putative	1			1
PF3D7_1426000	PF3D7_1426000	60S ribosomal protein L21	1			1
PF3D7_1426200	PF3D7_1426200	protein arginine N-methyltransferase 1	1				1
PF3D7_1433400	PF3D7_1433400	zinc finger protein, putative	1				1
PF3D7_1434200	PF3D7_1434200	calmodulin	1				1
PF3D7_1434300	PF3D7_1434300	Hsp70/Hsp90 organizing protein	1				1
PF3D7_1435500	PF3D7_1435500	clathrin light chain, putative	1				1
PF3D7_1436200	PF3D7_1436200	conserved Plasmodium protein, unknown function	1				1
PF3D7_1437200	PF3D7_1437200	ribonucleoside-diphosphate reductase large subunit, putative	1				1
PF3D7_1438000	PF3D7_1438000	eukaryotic translation initiation factor eIF2A, putative	1				1
PF3D7_1439900	PF3D7_1439900	triosephosphate isomerase	1				1
PF3D7_1446300	PF3D7_1446300	conserved Plasmodium membrane protein, unknown function	1				1
PF3D7_1447000	PF3D7_1447000	40S ribosomal protein S5	1				1
PF3D7_1448600	PF3D7_1448600	SNARE protein, putative	1				1
PF3D7_1449800	PF3D7_1449800	conserved protein, unknown function	1				1
PF3D7_1452500	PF3D7_1452500	syntaxin-6, putative	1				1
PF3D7_1454400	PF3D7_1454400	aminopeptidase P	1				1
PF3D7_1457000	PF3D7_1457000	signal peptide peptidase	1				1
PF3D7_1457500	PF3D7_1457500	vacuolar protein sorting-associated protein 4	1				1
PF3D7_1458900	PF3D7_1458900	golgi apparatus membrane protein TVP23, putative	1				1
PF3D7_1459800	PF3D7_1459800	bax inhibitor 1, putative	1			1	1
PF3D7_1460600	PF3D7_1460600	inner membrane complex sub-compartment protein 3	1				1
PF3D7_1463900	PF3D7_1463900	EF-hand calcium-binding domain-containing protein, putative	1				1
PF3D7_1464700	PF3D7_1464700	ATP synthase (C/AC39) subunit, putative	1			1
PF3D7_1468100	PF3D7_1468100	kelch domain-containing protein, putative	1				1
PF3D7_1470900	PF3D7_1470900	proteasome subunit beta type-2, putative	1				1
PF3D7_1471400	PF3D7_1471400	diacylglycerol kinase, putative	1				1
PF3D7_1472900	PF3D7_1472900	dihydroorotase, putative	1				1
PF3D7_1476300	PF3D7_1476300	Plasmodium exported protein (PHISTb), unknown function	1	1		1
PF3D7_1477000	PF3D7_1477000	Plasmodium exported protein (hyp17), unknown function, pseudogene	1				1
PF3D7_1477500	PF3D7_1477500	Plasmodium exported protein (PHISTb), unknown function	1			1
