# Supplementary material for: Ubiquitin activation is essential for schizont maturation in Plasmodium falciparum blood-stage development
Source: PLoS Pathog. 2020 Jun 22;16(6):e1008640. doi: 10.1371/journal.ppat.1008640 (PMC7332102; doi:10.1371/journal.ppat.1008640)
Supplement: S5 Dataset — (XLSX) [file ppat.1008640.s013.xlsx]

## Sheet: exported proteins
Protein AcNR	Protein name (PlasmoDB v.46)	# TM Domains	"exported" in protein name	SignalP Peptide	SignalP Scores	ExportPred score	PEXEL	HT motif	"EXPORTED" as defined from at least one source
PF3D7_0103200	nucleoside transporter 4	11	FALSE	HMM: MLKKSEEIQIKVIFFFIGLLLSLPS, NN: MLKKSEEIQIKVIFFFIGLLLSL	NN Sum: 4, NN D: .55, HMM Prob: .08		FALSE	FALSE	TRUE
PF3D7_0104200	StAR-related lipid transfer protein	0	FALSE	HMM: MSLKRRKFILLSFVFSVVELIFGY, NN: MSLKRRKFILLSFVFSVVELIFGY	NN Sum: 4, NN D: .8, HMM Prob: 1		FALSE	TRUE	TRUE
PF3D7_0113200	Plasmodium exported protein, unknown function	2	TRUE	null	null	10.4042	FALSE	FALSE	TRUE
PF3D7_0113900	CX3CL1-binding protein 1	3	TRUE	HMM: MNIYIRTIFFAPFICLLIFSSNHGL, NN: MNIYIRTIFFAPFICLLIFSSNHGL	NN Sum: 2, NN D: .56, HMM Prob: .51	12.2273	FALSE	TRUE	TRUE
PF3D7_0114000	exported protein family 1	1	TRUE	null	null		FALSE	FALSE	TRUE
PF3D7_0201900	erythrocyte membrane protein 3	1	FALSE	HMM: MATIKKYHIRGRKNILIFLLKIFLFSPLIWILIYSE, NN: MATIKKYHIRGRKNILIFLLKIFLFSPLIWILIYSE	NN Sum: 3, NN D: .55, HMM Prob: .08		TRUE	TRUE	TRUE
PF3D7_0202000	knob-associated histidine-rich protein	0	FALSE	HMM: MKSFKNKNTLRRKKAFPVFTKILLVSFLVWVLKCS, NN: MKSFKNKNTLRRKKAFPVFTKILLVSFLVWVLKCS	NN Sum: 3, NN D: .52, HMM Prob: .91	11.4504	TRUE	TRUE	TRUE
PF3D7_0202500	early transcribed membrane protein 2	1	FALSE	HMM: MKLSKILYFFAALLALNFIAPR, NN: MKLSKILYFFAALLALNFIAPR	NN Sum: 3, NN D: .62, HMM Prob: .97		FALSE	FALSE	TRUE
PF3D7_0204200	conserved Plasmodium protein, unknown function	1	FALSE	HMM: MFILYIIFVVIPFLIFAY, NN: MFILYIIFVVIPFLIFAY	NN Sum: 4, NN D: .83, HMM Prob: .34		FALSE	FALSE	TRUE
PF3D7_0210600	conserved protein, unknown function	0	FALSE	HMM: MFYLDTHNILYLGSCLLASVCTLCICR, NN: MFYLDTHNILYLGSCLLASVCTL	NN Sum: 3, NN D: .52, HMM Prob: .46		FALSE	FALSE	TRUE
PF3D7_0222100	Pfmc-2TM Maurer's cleft two transmembrane protein	3	FALSE	HMM: MFHYIYKIYIFTIILCASNLF, NN: MFHYIYKIYIFTIILCASNLF	NN Sum: 2, NN D: .58, HMM Prob: .02		TRUE	TRUE	TRUE
PF3D7_0301700	Plasmodium exported protein, unknown function	2	TRUE	null	null		TRUE	FALSE	TRUE
PF3D7_0318900	conserved protein, unknown function	2	FALSE	HMM: MQKFISVIFLFIIYLSFHLIYTK, NN: MQKFISVIFLFIIYLSFHLIYTK	NN Sum: 4, NN D: .78, HMM Prob: .73		FALSE	FALSE	TRUE
PF3D7_0401800	Plasmodium exported protein (PHISTb), unknown function	1	TRUE	null	null	11.4746	TRUE	FALSE	TRUE
PF3D7_0402000	Plasmodium exported protein (PHISTa), unknown function	1	TRUE	null	null	11.3777	TRUE	FALSE	TRUE
PF3D7_0402400	Plasmodium exported protein, unknown function	1	TRUE	null	null	10.3508	TRUE	TRUE	TRUE
PF3D7_0405900	apical sushi protein	1	FALSE	HMM: MKIIYHILIFLLHYNIIIKAK, NN: MKIIYHILIFLLHYNIIIKAK	NN Sum: 3, NN D: .53, HMM Prob: .02		FALSE	FALSE	TRUE
PF3D7_0406200	sexual stage-specific protein precursor	2	FALSE	HMM: MNIRKFIPSLALMLIFFAFANLVLSD, NN: MNIRKFIPSLALMLIFFAFANLVLSD	NN Sum: 4, NN D: .91, HMM Prob: 1		FALSE	FALSE	TRUE
PF3D7_0423700	early transcribed membrane protein 4	2	FALSE	HMM: MKLSNLFYVFALLISMNVFVPGF, NN: MKLSNLFYVFALLISMNVFVPGFMNVLGK	NN Sum: 4, NN D: .65, HMM Prob: .83		FALSE	FALSE	TRUE
PF3D7_0424600	Plasmodium exported protein (PHISTb), unknown function	0	TRUE	null	null	14.6835	TRUE	TRUE	TRUE
PF3D7_0500800	mature parasite-infected erythrocyte surface antigen	0	FALSE	null	null		TRUE	TRUE	TRUE
PF3D7_0501000	Plasmodium exported protein, unknown function	1	TRUE	null	null	15.0856	TRUE	TRUE	TRUE
PF3D7_0501200	parasite-infected erythrocyte surface protein	3	FALSE	HMM: MLLFFAKLVVFTFFFWLLKYGKTR, NN: MLLFFAKLVVFTFFFWLLKYGKTRSY	NN Sum: 4, NN D: .76, HMM Prob: .99		TRUE	TRUE	TRUE
PF3D7_0522600	inner membrane complex protein	8	FALSE	HMM: MENFHLHSMIKMNSTVSLLFGIFLTVIGSIFMAIAN, NN: MENFHLHSMIKMNSTVSLLFGIFLTVIGS	NN Sum: 4, NN D: .56, HMM Prob: .04		FALSE	FALSE	TRUE
PF3D7_0532300	Plasmodium exported protein (PHISTb), unknown function	0	TRUE	null	null		TRUE	FALSE	TRUE
PF3D7_0532400	lysine-rich membrane-associated PHISTb protein	1	FALSE	null	null	11.7853	TRUE	FALSE	TRUE
PF3D7_0613100	conserved Plasmodium protein, unknown function	2	FALSE	HMM: MKFLFHYLYYILVYIYFVSAQ, NN: MKFLFHYLYYILVYIYFVSAQ	NN Sum: 4, NN D: .77, HMM Prob: .26		FALSE	FALSE	TRUE
PF3D7_0702400	small exported membrane protein 1	1	TRUE	null	null		FALSE	FALSE	TRUE
PF3D7_0702500	Plasmodium exported protein, unknown function	1	TRUE	null	null		FALSE	FALSE	TRUE
PF3D7_0731300	Plasmodium exported protein (PHISTb), unknown function	1	TRUE	null	null	16.158	TRUE	TRUE	TRUE
PF3D7_0731500	erythrocyte binding antigen-175	1	FALSE	HMM: MKCNISIYFFASFFVLYFAKAR, NN: MKCNISIYFFASFFVLYFAKAR	NN Sum: 4, NN D: .67, HMM Prob: .43		FALSE	FALSE	TRUE
PF3D7_0731600	acyl-CoA synthetase	0	FALSE	HMM: MNISFTVCSLFILLINVVLHGA, NN: MNISFTVCSLFILLINVVLHGA	NN Sum: 3, NN D: .65, HMM Prob: .95		FALSE	FALSE	TRUE
PF3D7_0801000	Plasmodium exported protein (PHISTc), unknown function	1	TRUE	null	null		FALSE	FALSE	TRUE
PF3D7_0805600	PAP2-like protein, putative	7	FALSE	HMM: MLTKVYLPTLLHVGYLFNTIQCI, NN: MLTKVYLPTLLHVGYLFNTIQCI	NN Sum: 4, NN D: .53, HMM Prob: .27		FALSE	FALSE	TRUE
PF3D7_0817500	histidine triad nucleotide-binding protein 1	1	FALSE	HMM: MGFKIVFIYLIFVCLMKIIPGF, NN: MGFKIVFIYLIFVCLMKIIPGF	NN Sum: 4, NN D: .7, HMM Prob: .85		FALSE	FALSE	TRUE
PF3D7_0825300	SAYSvFN domain-containing protein, putative	1	FALSE	null	null		TRUE	FALSE	TRUE
PF3D7_0831400	Plasmodium exported protein, unknown function	1	TRUE	HMM: MMRILYTNVFLFIAVLFCILSPGN, NN: MMRILYTNVFLFIAVLFCILSPGNNPL	NN Sum: 3, NN D: .64, HMM Prob: .5	10.7523	FALSE	FALSE	TRUE
PF3D7_0831700	heat shock protein 70	1	FALSE	HMM: MKTKICSYIHYIVLFLIATTTVHTA, NN: MKTKICSYIHYIVLFLIATTTVHTA	NN Sum: 4, NN D: .76, HMM Prob: .74		FALSE	FALSE	TRUE
PF3D7_0917900	heat shock protein 70	0	FALSE	HMM: MKQIRPYILLLIVSLLKFISAV, NN: MKQIRPYILLLIVSLLKFISAVDSN	NN Sum: 4, NN D: .86, HMM Prob: 1		FALSE	FALSE	TRUE
PF3D7_0919100	DnaJ protein, putative	6	FALSE	HMM: MLNDIILQVIVAAFGVAIVNSD, NN: MLNDIILQVIVAAFGVAIVNSD	NN Sum: 4, NN D: .47, HMM Prob: .72		FALSE	FALSE	TRUE
PF3D7_0926600	conserved Plasmodium membrane protein, unknown function	12	FALSE	HMM: MKKYHKKFPNEMNLFLINSIYTLTLLMFLEIFFFLLDGINTF, NN: MKKYHKKFPNEMNLFLINSIYTLTLLMFLEIFFFLLDGINTF	NN Sum: 3, NN D: .51, HMM Prob: .04		FALSE	FALSE	TRUE
PF3D7_0929400	high molecular weight rhoptry protein 2	0	FALSE	HMM: MIKVTIFLLLSIFSFNLYGL, NN: MIKVTIFLLLSIFSFNLYGL	NN Sum: 4, NN D: .8, HMM Prob: .93		FALSE	FALSE	TRUE
PF3D7_0932100	protein MAM3, putative	4	FALSE	HMM: MQLWLLITCIVVCGILSSLFSGLSLGI, NN: MQLWLLITCIVVCGILSSLFSGLSLGI	NN Sum: 2, NN D: .59, HMM Prob: .91		FALSE	FALSE	TRUE
PF3D7_0935900	ring-exported protein 1	1	TRUE	null	null		FALSE	FALSE	TRUE
PF3D7_0936800	Plasmodium exported protein (PHISTc), unknown function	1	TRUE	null	null		TRUE	FALSE	TRUE
PF3D7_0936900	Plasmodium exported protein (PHISTb), unknown function, pseudogene	0	TRUE	null	null		TRUE	TRUE	TRUE
PF3D7_1001600	exported lipase 2	0	FALSE	null	null		TRUE	FALSE	TRUE
PF3D7_1002100	EMP1-trafficking protein	1	FALSE	null	null		TRUE	TRUE	TRUE
PF3D7_1016400	serine/threonine protein kinase, FIKK family	1	FALSE	null	null	18.6063	TRUE	TRUE	TRUE
PF3D7_1018300	peptidase, putative	2	FALSE	HMM: MDVQKKKCKTYYLIAILIWFILISVVLSR, NN: MDVQKKKCKTYYLIAILIWFILISVVLSR	NN Sum: 4, NN D: .77, HMM Prob: .2		FALSE	TRUE	TRUE
PF3D7_1024800	exported protein 3	2	FALSE	HMM: MQIPTKFLVFFNLVILFVFLNFERVELK, NN: MQIPTKFLVFFNLVILFVFLNFERVELK	NN Sum: 4, NN D: .75, HMM Prob: .33		FALSE	FALSE	TRUE
PF3D7_1038000.1	antigen UB05	2	FALSE	HMM: MGSQIQPSRFLDSAILALFAMIISAS, NN: MGSQIQPSRFLDSAILALFAMIISAS	NN Sum: 4, NN D: .61, HMM Prob: .24		FALSE	FALSE	TRUE
PF3D7_1102500	Plasmodium exported protein (PHISTb), unknown function	1	TRUE	null	null		TRUE	FALSE	TRUE
PF3D7_1102800	early transcribed membrane protein 11.2	2	FALSE	HMM: MKITKIFYFFAALLALNFIAPN, NN: MKITKIFYFFAALLALNFIAPN	NN Sum: 2, NN D: .6, HMM Prob: .77		FALSE	FALSE	TRUE
PF3D7_1104100	syntaxin, Qa-SNARE family	1	FALSE	null	null		TRUE	FALSE	TRUE
PF3D7_1116000	rhoptry neck protein 4	0	FALSE	HMM: MSSVRFFLCIFLVLFTFIDIVKPF, NN: MSSVRFFLCIFLVLFTFIDIVKPF	NN Sum: 4, NN D: .83, HMM Prob: .84		FALSE	FALSE	TRUE
PF3D7_1121600	exported protein 1	1	TRUE	HMM: MKILSVFFLALFFIIFNKESLAE, NN: MKILSVFFLALFFIIFNKESLAE	NN Sum: 4, NN D: .85, HMM Prob: 1		FALSE	FALSE	TRUE
PF3D7_1122300	conserved Plasmodium protein, unknown function	2	FALSE	HMM: MTPVTFECISVALVSLFFIKILAY, NN: MTPVTFECISVALVSLFFIKILAY	NN Sum: 3, NN D: .62, HMM Prob: .73		FALSE	FALSE	TRUE
PF3D7_1133400	apical membrane antigen 1	1	FALSE	HMM: MRKLYCVLLLSAFEFTYMINFGRGQ, NN: MRKLYCVLLLSAFEFTYMINFGRGQ	NN Sum: 4, NN D: .62, HMM Prob: .9		FALSE	FALSE	TRUE
PF3D7_1201200	Plasmodium exported protein (PHISTa-like), unknown function	1	TRUE	null	null	15.0805	TRUE	FALSE	TRUE
PF3D7_1216400	conserved Plasmodium membrane protein, unknown function	9	FALSE	HMM: MFKRCILYFVISIFSLVLVVYKESR, NN: MFKRCILYFVISIFSLVLVVYK	NN Sum: 3, NN D: .66, HMM Prob: .01		FALSE	FALSE	TRUE
PF3D7_1301700	CX3CL1-binding protein 2	3	TRUE	HMM: MSFCYVRTISIALFLFIFLFLNNGN, NN: MSFCYVRTISIALFLFIFLFLNNGN	NN Sum: 4, NN D: .69, HMM Prob: .06	16.1624	TRUE	TRUE	TRUE
PF3D7_1302000	EMP1-trafficking protein	2	FALSE	null	null		TRUE	TRUE	TRUE
PF3D7_1324900	L-lactate dehydrogenase	1	FALSE	HMM: MAPKAKIVLVGSGMIGGVMAT, NN: MAPKAKIVLVGSGMIGGVMAT	NN Sum: 4, NN D: .68, HMM Prob: .87		FALSE	FALSE	TRUE
PF3D7_1333200	ubiquitin-activating enzyme	3	FALSE	HMM: MNILCIHIVYCFIACLLLCNINQVFTL, NN: MNILCIHIVYCFIACLLLCNINQVFTL	NN Sum: 4, NN D: .78, HMM Prob: .71		FALSE	FALSE	TRUE
PF3D7_1340900	sodium-dependent phosphate transporter	10	FALSE	HMM: MVTGPDMLWLVITSGIACFFMAFVTGA, NN: MVTGPDMLWLVITSGIACFFMAFVTGA	NN Sum: 4, NN D: .67, HMM Prob: .72		FALSE	FALSE	TRUE
PF3D7_1344800	aspartate carbamoyltransferase	1	FALSE	HMM: MIEIFCTAIVVITILIVGV, NN: MIEIFCTAIVVITILIVGVFVYMIIRTK	NN Sum: 3, NN D: .59, HMM Prob: 0		FALSE	FALSE	TRUE
PF3D7_1352500	thioredoxin-related protein, putative	2	FALSE	HMM: MAIFKKSIIIFLFFTFFNYCFSQ, NN: MAIFKKSIIIFLFFTFFNYCFSQ	NN Sum: 4, NN D: .91, HMM Prob: 1		FALSE	FALSE	TRUE
PF3D7_1366800	phosphatidylserine synthase, putative	9	FALSE	HMM: MKSVYLFASSLLTTLLLSNAN, NN: MKSVYLFASSLLTTLLLSNAN	NN Sum: 4, NN D: .7, HMM Prob: .99		FALSE	FALSE	TRUE
PF3D7_1401200	Plasmodium exported protein, unknown function	1	TRUE	HMM: MFPSYIRKFSFTLLLCIIALSC, NN: MFPSYIRKFSFTLLLCIIALSC	NN Sum: 3, NN D: .66, HMM Prob: .66	13.0425	TRUE	TRUE	TRUE
PF3D7_1401400	early transcribed membrane protein 14.1	2	FALSE	HMM: MKVSNILFFFFAIIAVKLVYPG, NN: MKVSNILFFFFAIIAVKLVYPGYVAAG	NN Sum: 4, NN D: .77, HMM Prob: .98		FALSE	FALSE	TRUE
PF3D7_1407800	plasmepsin IV	1	FALSE	null	null		TRUE	FALSE	TRUE
PF3D7_1409600	conserved Plasmodium protein, unknown function	2	FALSE	HMM: MNYCTLLTICFFFCLFLTN, NN: MNYCTLLTICFFFCLFLTNVVYE	NN Sum: 4, NN D: .84, HMM Prob: .33		FALSE	FALSE	TRUE
PF3D7_1410400	rhoptry-associated protein 1	0	FALSE	HMM: MSFYLGSLVIIFHVLFRNVADGI, NN: MSFYLGSLVIIFHVLFRNVADGI	NN Sum: 4, NN D: .8, HMM Prob: .86		FALSE	FALSE	TRUE
PF3D7_1422500	ERAD-associated E3 ubiquitin-protein ligase HRD1	5	FALSE	HMM: MELNMRLYILLSHLGLAFILMYAF, NN: MELNMRLYILLSHLGLAF	NN Sum: 4, NN D: .73, HMM Prob: .1		FALSE	FALSE	TRUE
PF3D7_1436300	translocon component PTEX150	0	FALSE	HMM: MRIIILALLIVCTIINYYCAV, NN: MRIIILALLIVCTIINYYCAV	NN Sum: 4, NN D: .72, HMM Prob: .9		FALSE	FALSE	TRUE
PF3D7_1444300	1-acyl-sn-glycerol-3-phosphate acyltransferase, putative	2	FALSE	HMM: MEIDVKKKYKHSNILIRLILTIYIYIVMFLTLSFSL, NN: MEIDVKKKYKHSNILIRLILTIYIYIVMFLTLSFSL	NN Sum: 3, NN D: .48, HMM Prob: 0		FALSE	FALSE	TRUE
PF3D7_1446300	conserved Plasmodium membrane protein, unknown function	8	FALSE	HMM: MKVLILFFIFSFFHIIYVLFVYAS, NN: MKVLILFFIFSFFHIIYVLFVYAS	NN Sum: 4, NN D: .74, HMM Prob: .39		FALSE	FALSE	TRUE
PF3D7_1454400	aminopeptidase P	1	FALSE	HMM: MQLNFLLFVFIFLMVFHLN, NN: MQLNFLLFVFIFLMVFHLNIFN	NN Sum: 2, NN D: .62, HMM Prob: .45		FALSE	FALSE	TRUE
PF3D7_1456800	V-type H(+)-translocating pyrophosphatase, putative	16	FALSE	HMM: MDLFYVFLFLPPTIGL, NN: MDLFYVFLFLPPTIGL	NN Sum: 4, NN D: .72, HMM Prob: .92		FALSE	FALSE	TRUE
PF3D7_1463900	EF-hand calcium-binding domain-containing protein, putative	7	FALSE	HMM: MLMLYLHILLCIFLNNPVLVTN, NN: MLMLYLHILLCIFLNNPVLVTNE	NN Sum: 3, NN D: .6, HMM Prob: .62		FALSE	TRUE	TRUE
PF3D7_1471100	exported protein 2	0	TRUE	HMM: MKVSYIFSFFLLFFVYKNTNTV, NN: MKVSYIFSFFLLFFVYKNTNTV	NN Sum: 4, NN D: .81, HMM Prob: .91		FALSE	FALSE	TRUE
PF3D7_1476300	Plasmodium exported protein (PHISTb), unknown function	1	TRUE	null	null		TRUE	FALSE	TRUE
PF3D7_1477000	Plasmodium exported protein (hyp17), unknown function, pseudogene	2	TRUE	null	null		TRUE	TRUE	TRUE
PF3D7_1477500	Plasmodium exported protein (PHISTb), unknown function	1	TRUE	null	null		FALSE	FALSE	TRUE
PF3D7_1478600	EMP1-trafficking protein	2	FALSE	null	null		TRUE	TRUE	TRUE

## Sheet: export_proteins_stage
			Number of ubiquitylation sites identified at each stage of development
Gene name	LEADING AcNR	Protein name (PlasmoDB v.46)	All parasite stages	Rings	Trophozoites	Schizonts	Merozoites
PF3D7_0103200	PF3D7_0103200	nucleoside transporter 4	4			2	3
PF3D7_0104200	PF3D7_0104200	StAR-related lipid transfer protein	1		1		1
PF3D7_0113200	PF3D7_0113200	Plasmodium exported protein, unknown function	4		1	3
PF3D7_0113900	PF3D7_0113900	CX3CL1-binding protein 1	3			3
PF3D7_0114000	PF3D7_0114000	exported protein family 1	2			2
PF3D7_0201900	PF3D7_0201900	erythrocyte membrane protein 3	2		1	2
PF3D7_0202000	PF3D7_0202000	knob-associated histidine-rich protein	25		6	25	3
PF3D7_0202500	PF3D7_0202500	early transcribed membrane protein 2	2				2
PF3D7_0204200	PF3D7_0204200	conserved Plasmodium protein, unknown function	1				1
PF3D7_0210600	PF3D7_0210600	conserved protein, unknown function	5				5
PF3D7_0222100;PF3D7_0114100;PF3D7_1101700;PF3D7_1039700;PF3D7_0631400;PF3D7_0324100;PF3D7_0601200;PF3D7_0101300	PF3D7_0222100	Pfmc-2TM Maurer's cleft two transmembrane protein	1		1
PF3D7_0301700	PF3D7_0301700	Plasmodium exported protein, unknown function	1			1
PF3D7_0318900	PF3D7_0318900	conserved protein, unknown function	5				5
PF3D7_0401800	PF3D7_0401800	Plasmodium exported protein (PHISTb), unknown function	2		2	2
PF3D7_0402000	PF3D7_0402000	Plasmodium exported protein (PHISTa), unknown function	11		7	8
PF3D7_0402400	PF3D7_0402400	Plasmodium exported protein, unknown function	1			1
PF3D7_0405900	PF3D7_0405900	apical sushi protein	2		2		2
PF3D7_0406200	PF3D7_0406200	sexual stage-specific protein precursor	1			1
PF3D7_0423700	PF3D7_0423700	early transcribed membrane protein 4	1			1
PF3D7_0424600	PF3D7_0424600	Plasmodium exported protein (PHISTb), unknown function	5		3	5	3
PF3D7_0500800	PF3D7_0500800	mature parasite-infected erythrocyte surface antigen	8		2	8
PF3D7_0501000	PF3D7_0501000	Plasmodium exported protein, unknown function	5		1	5	3
PF3D7_0501200	PF3D7_0501200	parasite-infected erythrocyte surface protein	12		5	12	5
PF3D7_0522600	PF3D7_0522600	inner membrane complex protein	1				1
PF3D7_0532300	PF3D7_0532300	Plasmodium exported protein (PHISTb), unknown function	1			1
PF3D7_0532400	PF3D7_0532400	lysine-rich membrane-associated PHISTb protein	3		1	3
PF3D7_0613100	PF3D7_0613100	conserved Plasmodium protein, unknown function	1		1	1	1
PF3D7_0702400	PF3D7_0702400	small exported membrane protein 1	2		1	2	1
PF3D7_0702500	PF3D7_0702500	Plasmodium exported protein, unknown function	2		1	1
PF3D7_0731300	PF3D7_0731300	Plasmodium exported protein (PHISTb), unknown function	1			1
PF3D7_0731500	PF3D7_0731500	erythrocyte binding antigen-175	1				1
PF3D7_0731600;PF3D7_1477900	PF3D7_0731600	acyl-CoA synthetase	1		1	1
PF3D7_0801000	PF3D7_0801000	Plasmodium exported protein (PHISTc), unknown function	2			2
PF3D7_0805600	PF3D7_0805600	PAP2-like protein, putative	1				1
PF3D7_0817500	PF3D7_0817500	histidine triad nucleotide-binding protein 1	1		1	1	1
PF3D7_0825300	PF3D7_0825300	SAYSvFN domain-containing protein, putative	1				1
PF3D7_0831400	PF3D7_0831400	Plasmodium exported protein, unknown function	7		3	7	1
PF3D7_0831700	PF3D7_0831700	heat shock protein 70	2			1	1
PF3D7_0917900	PF3D7_0917900	heat shock protein 70	4			1	4
PF3D7_0919100	PF3D7_0919100	DnaJ protein, putative	3				3
PF3D7_0926600	PF3D7_0926600	conserved Plasmodium membrane protein, unknown function	3	3
PF3D7_0929400	PF3D7_0929400	high molecular weight rhoptry protein 2	2		1	2	2
PF3D7_0932100	PF3D7_0932100	protein MAM3, putative	1				1
PF3D7_0935900	PF3D7_0935900	ring-exported protein 1	24		9	23
PF3D7_0936800	PF3D7_0936800	Plasmodium exported protein (PHISTc), unknown function	13			13
PF3D7_0936900	PF3D7_0936900	Plasmodium exported protein (PHISTb), unknown function, pseudogene	1			1
PF3D7_1001600	PF3D7_1001600	exported lipase 2	1		1
PF3D7_1002100	PF3D7_1002100	EMP1-trafficking protein	4			4
PF3D7_1016400	PF3D7_1016400	serine/threonine protein kinase, FIKK family	2		1	2	1
PF3D7_1018300	PF3D7_1018300	peptidase, putative	1				1
PF3D7_1024800	PF3D7_1024800	exported protein 3	2	1		2	1
PF3D7_1038000.1;PF3D7_1038000.2	PF3D7_1038000.1	antigen UB05	5		1	3	5
PF3D7_1102500	PF3D7_1102500	Plasmodium exported protein (PHISTb), unknown function	4			4
PF3D7_1102800	PF3D7_1102800	early transcribed membrane protein 11.2	5				5
PF3D7_1104100	PF3D7_1104100	syntaxin, Qa-SNARE family	1				1
PF3D7_1116000	PF3D7_1116000	rhoptry neck protein 4	1	1
PF3D7_1121600	PF3D7_1121600	exported protein 1	3			1	3
PF3D7_1122300	PF3D7_1122300	conserved Plasmodium protein, unknown function	2				2
PF3D7_1133400	PF3D7_1133400	apical membrane antigen 1	1				1
PF3D7_1201200	PF3D7_1201200	Plasmodium exported protein (PHISTa-like), unknown function	2				2
PF3D7_1216400	PF3D7_1216400	conserved Plasmodium membrane protein, unknown function	3				3
PF3D7_1301700	PF3D7_1301700	CX3CL1-binding protein 2	7			7
PF3D7_1302000	PF3D7_1302000	EMP1-trafficking protein	3			3	1
PF3D7_1324900	PF3D7_1324900	L-lactate dehydrogenase	1	1	1		1
PF3D7_1333200	PF3D7_1333200	ubiquitin-activating enzyme	1				1
PF3D7_1340900	PF3D7_1340900	sodium-dependent phosphate transporter	3			1	2
PF3D7_1344800	PF3D7_1344800	aspartate carbamoyltransferase	1			1
PF3D7_1352500	PF3D7_1352500	thioredoxin-related protein, putative	8		2		8
PF3D7_1366800	PF3D7_1366800	phosphatidylserine synthase, putative	5				5
PF3D7_1401200	PF3D7_1401200	Plasmodium exported protein, unknown function	8		7	7
PF3D7_1401400	PF3D7_1401400	early transcribed membrane protein 14.1	2				2
PF3D7_1407800	PF3D7_1407800	plasmepsin IV	3	1		2	3
PF3D7_1409600	PF3D7_1409600	conserved Plasmodium protein, unknown function	1			1
PF3D7_1410400	PF3D7_1410400	rhoptry-associated protein 1	3	3
PF3D7_1422500	PF3D7_1422500	ERAD-associated E3 ubiquitin-protein ligase HRD1	2			2	2
PF3D7_1436300	PF3D7_1436300	translocon component PTEX150	4				4
PF3D7_1444300	PF3D7_1444300	1-acyl-sn-glycerol-3-phosphate acyltransferase, putative	2				2
PF3D7_1446300	PF3D7_1446300	conserved Plasmodium membrane protein, unknown function	1				1
PF3D7_1454400	PF3D7_1454400	aminopeptidase P	1				1
PF3D7_1456800	PF3D7_1456800	V-type H(+)-translocating pyrophosphatase, putative	4			2	4
PF3D7_1463900	PF3D7_1463900	EF-hand calcium-binding domain-containing protein, putative	1				1
PF3D7_1471100	PF3D7_1471100	exported protein 2	2				2
PF3D7_1476300	PF3D7_1476300	Plasmodium exported protein (PHISTb), unknown function	1	1		1
PF3D7_1477000	PF3D7_1477000	Plasmodium exported protein (hyp17), unknown function, pseudogene	1				1
PF3D7_1477500	PF3D7_1477500	Plasmodium exported protein (PHISTb), unknown function	1			1
PF3D7_1478600	PF3D7_1478600	EMP1-trafficking protein	4			4
